# Supplementary material for: Corrigendum to “Transcriptome Profiling across Five Tissues of Giant Panda”
Source: Hindawi journal article supplement (doi:10.1155/2022/9846545), 2022-01-01
Supplement: f1 [file 9846545.f1.pdf]

## BioMed Research International

### Transcriptome profiling across five tissues of giant panda

Feng Li<sup>1,2,4</sup>, Chengdong Wang<sup>3,4</sup>, Zhongxian Xu<sup>1,4</sup>, Mingzhou Li<sup>1</sup>, Linhua Deng<sup>3</sup>, Ming Wei<sup>3</sup>, Hemin Zhang<sup>3</sup>, Kai Wu<sup>3</sup>, Ruihong Ning<sup>1</sup>, Diyan Li<sup>1</sup>, Mingyao Yang<sup>1</sup>, Mingwang Zhang<sup>1</sup>, Qingyong Ni<sup>1</sup>, Bo Zeng<sup>1\*</sup>, Desheng Li<sup>3\*</sup> and Ying Li<sup>1\*</sup>

<sup>1</sup> Farm Animal Genetic Resources Exploration and Innovation Key Laboratory of Sichuan Province, Sichuan Agricultural University, Chengdu 611130, China.

<sup>2</sup> Key Laboratory of Southwest China Wildlife Resources Conservation (Ministry of Education), China West Normal University, Nanchong 637002, China.

<sup>3</sup> Key Laboratory of SFGA on Conservation Biology of Rare Animals in the Giant Panda National Park (CCRCGP), Dujiangyan 611830, China.

<sup>4</sup> These authors contributed equally to this work.

\* Correspondence should be addressed to Ying Li, [yingli@sicau.edu.cn](mailto:yingli@sicau.edu.cn); Desheng Li, [1050133153@qq.com](mailto:1050133153@qq.com); Bo Zeng, [apollobovey@163.com](mailto:apollobovey@163.com).

**Supplementary Table S1: Individual information of giant panda used in this study.**

| Sample | Sex    | Age | Birth year | Death year | Cause of death  |
|--------|--------|-----|------------|------------|-----------------|
| 1      | female | 27  | 1988       | 2015       | Ovarian cancer  |
| 2      | female | 9   | 2007       | 2016       | Ileac pssion    |
| 3      | female | 0.5 | 2017       | 2018       | Virus infection |
| 4      | female | 0.5 | 2017       | 2018       | Virus infection |
| 5      | male   | 0.5 | 2017       | 2018       | Virus infection |
