# Supplementary material for: Corrigendum to “Transcriptome Profiling across Five Tissues of Giant Panda”
Source: Hindawi journal article supplement (doi:10.1155/2022/9846545), 2022-01-01
Supplement: f2 [file 9846545.f2.pdf]

**BioMed Research International****Transcriptome profiling across five tissues of giant panda**

Feng Li<sup>1,2,4</sup>, Chengdong Wang<sup>3,4</sup>, Zhongxian Xu<sup>1,4</sup>, Mingzhou Li<sup>1</sup>, Linhua Deng<sup>3</sup>, Ming Wei<sup>3</sup>, Hemin Zhang<sup>3</sup>, Kai Wu<sup>3</sup>, Ruihong Ning<sup>1</sup>, Diyan Li<sup>1</sup>, Mingyao Yang<sup>1</sup>, Mingwang Zhang<sup>1</sup>, Qingyong Ni<sup>1</sup>, Bo Zeng<sup>1\*</sup>, Desheng Li<sup>3\*</sup> and Ying Li<sup>1\*</sup>

<sup>1</sup> Farm Animal Genetic Resources Exploration and Innovation Key Laboratory of Sichuan Province, Sichuan Agricultural University, Chengdu 611130, China.

<sup>2</sup> Key Laboratory of Southwest China Wildlife Resources Conservation (Ministry of Education), China West Normal University, Nanchong 637002, China.

<sup>3</sup> Key Laboratory of SFGA on Conservation Biology of Rare Animals in the Giant Panda National Park (CCRCGP), Dujiangyan 611830, China.

<sup>4</sup> These authors contributed equally to this work.

\* Correspondence should be addressed to Ying Li, [yingli@sicau.edu.cn](mailto:yingli@sicau.edu.cn); Desheng Li, [1050133153@qq.com](mailto:1050133153@qq.com); Bo Zeng, [apollobovey@163.com](mailto:apollobovey@163.com).

**Supplementary Table S2: Quality summary of RNA-seq results in all samples of giant panda.**

| Sample   | Raw reads  | Clean reads | Clean bases (Gb) | Q30 (%) | Error rate (%) | Total mapped reads | Uniquely mapped reads |
|----------|------------|-------------|------------------|---------|----------------|--------------------|-----------------------|
| Heart_1  | 51,744,936 | 50,726,066  | 7.61             | 94.97   | 0.01           | 46,634,739         | 45,648,774            |
| Heart_2  | 47,851,148 | 46,089,008  | 6.91             | 93.12   | 0.01           | 42,228,397         | 41,273,541            |
| Heart_3  | 50,628,204 | 48,708,950  | 7.31             | 94.05   | 0.01           | 45,779,024         | 44,894,566            |
| Heart_4  | 51,844,648 | 50,187,242  | 7.53             | 93.82   | 0.01           | 46,795,885         | 45,836,127            |
| Heart_5  | 53,270,276 | 51,646,352  | 7.75             | 93.77   | 0.01           | 48,673,961         | 47,849,884            |
| Liver_1  | 50,465,764 | 49,475,252  | 7.42             | 94.98   | 0.01           | 45,920,054         | 44,917,153            |
| Liver_2  | 59,693,254 | 57,194,518  | 8.58             | 93.24   | 0.01           | 52,588,523         | 51,344,776            |
| Liver_3  | 49,170,054 | 47,299,158  | 7.09             | 94.16   | 0.01           | 44,400,247         | 42,384,130            |
| Liver_4  | 49,991,182 | 48,422,536  | 7.26             | 94.00   | 0.01           | 45,171,770         | 44,249,994            |
| Liver_5  | 57,827,022 | 57,302,930  | 8.60             | 94.61   | 0.01           | 54,315,952         | 53,057,011            |
| Spleen_1 | 50,401,038 | 49,133,374  | 7.37             | 94.9    | 0.01           | 44,017,687         | 43,244,089            |
| Spleen_2 | 50,067,098 | 47,923,264  | 7.19             | 91.83   | 0.02           | 41,770,566         | 41,081,521            |
| Spleen_3 | 50,460,884 | 48,556,290  | 7.28             | 93.50   | 0.01           | 44,372,147         | 43,580,484            |
| Spleen_4 | 57,571,712 | 55,730,934  | 8.36             | 93.64   | 0.01           | 50,687,962         | 49,857,154            |
| Spleen_5 | 62,963,770 | 60,993,434  | 9.15             | 94.14   | 0.01           | 55,556,977         | 54,448,341            |
| Lung_1   | 54,406,030 | 53,098,304  | 7.96             | 94.84   | 0.01           | 47,689,472         | 46,882,040            |
| Lung_2   | 55,993,872 | 53,194,246  | 7.98             | 92.76   | 0.02           | 47,664,214         | 47,089,945            |
| Lung_3   | 53,314,866 | 51,242,152  | 7.69             | 93.75   | 0.01           | 47,139,964         | 46,451,691            |
| Lung_4   | 59,395,156 | 57,417,972  | 8.61             | 93.64   | 0.01           | 52,593,123         | 51,923,926            |

|          |            |            |      |       |      |            |            |
|----------|------------|------------|------|-------|------|------------|------------|
| Lung_5   | 57,572,592 | 55,718,040 | 8.36 | 93.75 | 0.01 | 51,351,491 | 50,578,055 |
| Kidney_1 | 46,951,278 | 45,665,666 | 6.85 | 95.03 | 0.01 | 41,475,658 | 40,855,919 |
| Kidney_2 | 55,466,166 | 53,273,152 | 7.99 | 92.71 | 0.02 | 47,529,941 | 46,551,630 |
| Kidney_3 | 54,975,436 | 52,876,546 | 7.93 | 93.60 | 0.01 | 49,054,976 | 48,313,814 |
| Kidney_4 | 52,772,262 | 50,726,754 | 7.61 | 93.86 | 0.01 | 46,636,745 | 45,698,448 |
| Kidney_5 | 55,971,720 | 54,208,226 | 8.13 | 94.21 | 0.01 | 50,480,440 | 49,726,761 |
| Mean     | 53,630,815 | 51,872,415 | 7.78 | 93.88 | 0.01 | 47,621,197 | 46,709,591 |
