# Supplementary material for: Corrigendum to “Transcriptome Profiling across Five Tissues of Giant Panda”
Source: Hindawi journal article supplement (doi:10.1155/2022/9846545), 2022-01-01
Supplement: f4 [file 9846545.f4.pdf]

## Supplementary Information

### BioMed Research International

#### Transcriptome profiling across five tissues of giant panda

Feng Li<sup>1,2,4</sup>, Chengdong Wang<sup>3,4</sup>, Zhongxian Xu<sup>1,4</sup>, Mingzhou Li<sup>1</sup>, Linhua Deng<sup>3</sup>, Ming Wei<sup>3</sup>, Hemin Zhang<sup>3</sup>, Kai Wu<sup>3</sup>, Ruihong Ning<sup>1</sup>, Diyan Li<sup>1</sup>, Mingyao Yang<sup>1</sup>, Mingwang Zhang<sup>1</sup>, Qingyong Ni<sup>1</sup>, Bo Zeng<sup>1\*</sup>, Desheng Li<sup>3\*</sup> and Ying Li<sup>1\*</sup>

<sup>1</sup> Farm Animal Genetic Resources Exploration and Innovation Key Laboratory of Sichuan Province, Sichuan Agricultural University, Chengdu 611130, China.

<sup>2</sup> Key Laboratory of Southwest China Wildlife Resources Conservation (Ministry of Education), China West Normal University, Nanchong 637002, China.

<sup>3</sup> Key Laboratory of SFGA on Conservation Biology of Rare Animals in the Giant Panda National Park (CCRCGP), Dujiangyan 611830, China.

<sup>4</sup> These authors contributed equally to this work.

\* Correspondence should be addressed to Ying Li, [yingli@sicau.edu.cn](mailto:yingli@sicau.edu.cn); Desheng Li, [1050133153@qq.com](mailto:1050133153@qq.com); Bo Zeng, [apollobovey@163.com](mailto:apollobovey@163.com).

**Supplementary Table S4: List of tissue-specific differentially expressed genes of each tissue of giant panda.**

| Tissue | Gene id            | Gene name | Gene description                                                 |
|--------|--------------------|-----------|------------------------------------------------------------------|
| Heart  | ENSAMEG00000000017 | ILDR2     | immunoglobulin like domain containing receptor 2                 |
| Heart  | ENSAMEG00000000020 | DUSP27    | dual specificity phosphatase 27, atypical                        |
| Heart  | ENSAMEG00000000028 | CTH       | cystathionine gamma-lyase                                        |
| Heart  | ENSAMEG00000000066 | ACP5      | acid phosphatase 5, tartrate resistant                           |
| Heart  | ENSAMEG00000000091 | BTBD6     | BTB domain containing 6                                          |
| Heart  | ENSAMEG00000000101 | MORN4     | MORN repeat containing 4                                         |
| Heart  | ENSAMEG00000000108 | ANKRD2    | ankyrin repeat domain 2                                          |
| Heart  | ENSAMEG00000000136 | TRPC4     | transient receptor potential cation channel subfamily C member 4 |
| Heart  | ENSAMEG00000000156 | SEPTIN6   | septin 6                                                         |
| Heart  | ENSAMEG00000000212 | FXYP1     | FXYP domain containing ion transport regulator 1                 |
| Heart  | ENSAMEG00000000218 | --        | --                                                               |
| Heart  | ENSAMEG00000000228 | LSR       | lipolysis stimulated lipoprotein receptor                        |
| Heart  | ENSAMEG00000000285 | HOOK1     | hook microtubule tethering protein 1                             |
| Heart  | ENSAMEG00000000317 | --        | --                                                               |
| Heart  | ENSAMEG00000000366 | G6PD      | glucose-6-phosphate dehydrogenase                                |

|       |                    |           |                                                            |
|-------|--------------------|-----------|------------------------------------------------------------|
| Heart | ENSAMEG00000000377 | CCDC141   | coiled-coil domain containing 141                          |
| Heart | ENSAMEG00000000394 | TTN       | titin                                                      |
| Heart | ENSAMEG00000000462 | ZNF280B   | zinc finger protein 280B                                   |
| Heart | ENSAMEG00000000470 | DTNA      | dystrobrevin alpha                                         |
| Heart | ENSAMEG00000000485 | LRR8B     | leucine rich repeat containing 8 VRAC subunit B            |
| Heart | ENSAMEG00000000519 | OSR2      | odd-skipped related transcription factor 2                 |
| Heart | ENSAMEG00000000522 | EDN2      | endothelin 2                                               |
| Heart | ENSAMEG00000000543 | TM6SF1    | transmembrane 6 superfamily member 1                       |
| Heart | ENSAMEG00000000546 | TECRL     | trans-2,3-enoyl-CoA reductase like                         |
| Heart | ENSAMEG00000000576 | EPHX4     | epoxide hydrolase 4                                        |
| Heart | ENSAMEG00000000582 | BTBD1     | BTB domain containing 1                                    |
| Heart | ENSAMEG00000000610 | LARGE2    | LARGE xylosyl- and glucuronyltransferase 2                 |
| Heart | ENSAMEG00000000624 | TULP1     | tubby like protein 1                                       |
| Heart | ENSAMEG00000000640 | HSPB6     | heat shock protein family B (small) member 6               |
| Heart | ENSAMEG00000000671 | PLPPR1    | phospholipid phosphatase related 1                         |
| Heart | ENSAMEG00000000710 | --        | --                                                         |
| Heart | ENSAMEG00000000711 | CAP2      | cyclase associated actin cytoskeleton regulatory protein 2 |
| Heart | ENSAMEG00000000763 | TP63      | tumor protein p63                                          |
| Heart | ENSAMEG00000000775 | DMPK      | DM1 protein kinase                                         |
| Heart | ENSAMEG00000000776 | KIAA1324L | KIAA1324 like                                              |
| Heart | ENSAMEG00000000866 | MYLK3     | myosin light chain kinase 3                                |
| Heart | ENSAMEG00000000923 | ABCB4     | ATP binding cassette subfamily B member 4                  |
| Heart | ENSAMEG00000000931 | FHOD3     | formin homology 2 domain containing 3                      |
| Heart | ENSAMEG00000000988 | PACSIN1   | protein kinase C and casein kinase substrate in neurons 1  |
| Heart | ENSAMEG00000001051 | COX7A1    | cytochrome c oxidase subunit 7A1                           |
| Heart | ENSAMEG00000001117 | ACTN2     | actinin alpha 2                                            |
| Heart | ENSAMEG00000001161 | ST3GAL3   | ST3 beta-galactoside alpha-2,3-sialyltransferase 3         |
| Heart | ENSAMEG00000001296 | XIRP2     | xin actin binding repeat containing 2                      |
| Heart | ENSAMEG00000001314 | MET       | MET proto-oncogene, receptor tyrosine kinase               |
| Heart | ENSAMEG00000001332 | DNAJB6    | DnaJ heat shock protein family (Hsp40) member B6           |
| Heart | ENSAMEG00000001404 | MB        | myoglobin                                                  |
| Heart | ENSAMEG00000001424 | ADAMTSL4  | ADAMTS like 4                                              |
| Heart | ENSAMEG00000001435 | NUAK2     | NUAK family kinase 2                                       |
| Heart | ENSAMEG00000001476 | CDK18     | cyclin dependent kinase 18                                 |
| Heart | ENSAMEG00000001550 | PTP4A3    | protein tyrosine phosphatase type IVA, member 3            |
| Heart | ENSAMEG00000001552 | EEF1A2    | eukaryotic translation elongation factor 1 alpha 2         |
| Heart | ENSAMEG00000001578 | ADAMDEC1  | ADAM like decysin 1                                        |
| Heart | ENSAMEG00000001616 | UCN       | urocortin                                                  |
| Heart | ENSAMEG00000001625 | TRIM54    | tripartite motif containing 54                             |
| Heart | ENSAMEG00000001638 | IQGAP2    | IQ motif containing GTPase activating protein 2            |
| Heart | ENSAMEG00000001662 | TBX20     | T-box 20                                                   |
| Heart | ENSAMEG00000001730 | DUSP13    | dual specificity phosphatase 13                            |
| Heart | ENSAMEG00000001745 | ASB18     | ankyrin repeat and SOCS box containing 18                  |

|       |                    |              |                                                                    |
|-------|--------------------|--------------|--------------------------------------------------------------------|
| Heart | ENSAMEG00000001771 | AKR1C8P      | aldo-keto reductase family 1 member C8, pseudogene                 |
| Heart | ENSAMEG00000001779 | GBX2         | gastrulation brain homeobox 2                                      |
| Heart | ENSAMEG00000001819 | NDUFV3       | NADH:ubiquinone oxidoreductase subunit V3                          |
| Heart | ENSAMEG00000001864 | STAU2        | staufen double-stranded RNA binding protein 2                      |
| Heart | ENSAMEG00000001897 | PPP2R3B      | protein phosphatase 2 regulatory subunit B''beta                   |
| Heart | ENSAMEG00000001943 | PLIN4        | perilipin 4                                                        |
| Heart | ENSAMEG00000002012 | DPYSL5       | dihydropyrimidinase like 5                                         |
| Heart | ENSAMEG00000002134 | CACNA1D      | calcium voltage-gated channel subunit alpha1 D                     |
| Heart | ENSAMEG00000002200 | ST14         | suppression of tumorigenicity 14                                   |
| Heart | ENSAMEG00000002238 | DRC1         | dynein regulatory complex subunit 1                                |
| Heart | ENSAMEG00000002250 | TMEM144      | transmembrane protein 144                                          |
| Heart | ENSAMEG00000002265 | METTL7A      | methyltransferase like 7A                                          |
| Heart | ENSAMEG00000002298 | NT5M         | 5',3'-nucleotidase, mitochondrial                                  |
| Heart | ENSAMEG00000002387 | --           | --                                                                 |
| Heart | ENSAMEG00000002489 | SLC25A35     | solute carrier family 25 member 35                                 |
| Heart | ENSAMEG00000002508 | TMEM45B      | transmembrane protein 45B                                          |
| Heart | ENSAMEG00000002547 | ANK1         | ankyrin 1                                                          |
| Heart | ENSAMEG00000002550 | GALNT3       | polypeptide N-acetylgalactosaminyltransferase 3                    |
| Heart | ENSAMEG00000002556 | KCNJ5        | potassium voltage-gated channel subfamily J member 5               |
| Heart | ENSAMEG00000002573 | LOC100468405 | N-acetyllactosaminide<br>beta-1,6-N-acetylglucosaminyl-transferase |
| Heart | ENSAMEG00000002575 | CFAP65       | cilia and flagella associated protein 65                           |
| Heart | ENSAMEG00000002577 | PPP1R3A      | protein phosphatase 1 regulatory subunit 3A                        |
| Heart | ENSAMEG00000002582 | RYR2         | ryanodine receptor 2                                               |
| Heart | ENSAMEG00000002608 | PLCH1        | phospholipase C eta 1                                              |
| Heart | ENSAMEG00000002674 | SPATA6L      | spermatogenesis associated 6 like                                  |
| Heart | ENSAMEG00000002676 | PRKAG3       | protein kinase AMP-activated non-catalytic subunit gamma<br>3      |
| Heart | ENSAMEG00000002701 | NAT16        | N-acetyltransferase 16 (putative)                                  |
| Heart | ENSAMEG00000002706 | MOGAT3       | monoacylglycerol O-acyltransferase 3                               |
| Heart | ENSAMEG00000002804 | SDC1         | syndecan 1                                                         |
| Heart | ENSAMEG00000002890 | MIOX         | myo-inositol oxygenase                                             |
| Heart | ENSAMEG00000002953 | RNF150       | ring finger protein 150                                            |
| Heart | ENSAMEG00000002973 | FHL1         | four and a half LIM domains 1                                      |
| Heart | ENSAMEG00000002999 | CPT1B        | carnitine palmitoyltransferase 1B                                  |
| Heart | ENSAMEG00000003000 | PINK1        | PTEN induced putative kinase 1                                     |
| Heart | ENSAMEG00000003026 | ABCC8        | ATP binding cassette subfamily C member 8                          |
| Heart | ENSAMEG00000003040 | ARID3A       | AT-rich interaction domain 3A                                      |
| Heart | ENSAMEG00000003064 | GPR39        | G protein-coupled receptor 39                                      |
| Heart | ENSAMEG00000003082 | PDLIM2       | PDLIM2                                                             |
| Heart | ENSAMEG00000003158 | ITGA4        | integrin subunit alpha 4                                           |
| Heart | ENSAMEG00000003181 | USH1C        | USH1 protein network component harmonin                            |
| Heart | ENSAMEG00000003204 | NIPAL1       | NIPA like domain containing 1                                      |

|       |                    |          |                                                                     |
|-------|--------------------|----------|---------------------------------------------------------------------|
| Heart | ENSAMEG00000003217 | PAOX     | polyamine oxidase                                                   |
| Heart | ENSAMEG00000003272 | CORIN    | corin, serine peptidase                                             |
| Heart | ENSAMEG00000003321 | SHC3     | SHC adaptor protein 3                                               |
| Heart | ENSAMEG00000003341 | LGI3     | leucine rich repeat LGI family member 3                             |
| Heart | ENSAMEG00000003360 | REEP4    | receptor accessory protein 4                                        |
| Heart | ENSAMEG00000003381 | FPGT     | fucose-1-phosphate guanylyltransferase                              |
| Heart | ENSAMEG00000003388 | --       | --                                                                  |
| Heart | ENSAMEG00000003417 | TNNT1    | troponin T1, slow skeletal type                                     |
| Heart | ENSAMEG00000003421 | --       | --                                                                  |
| Heart | ENSAMEG00000003423 | GPNMB    | glycoprotein nmb                                                    |
| Heart | ENSAMEG00000003436 | PYGB     | glycogen phosphorylase B                                            |
| Heart | ENSAMEG00000003454 | ADAMTSL5 | ADAMTS like 5                                                       |
| Heart | ENSAMEG00000003486 | TNNI3    | troponin I3, cardiac type                                           |
| Heart | ENSAMEG00000003492 | SLC44A5  | solute carrier family 44 member 5                                   |
| Heart | ENSAMEG00000003512 | MREG     | melanoregulin                                                       |
| Heart | ENSAMEG00000003543 | --       | --                                                                  |
| Heart | ENSAMEG00000003546 | SPTB     | spectrin beta, erythrocytic                                         |
| Heart | ENSAMEG00000003591 | TMEM26   | transmembrane protein 26                                            |
| Heart | ENSAMEG00000003633 | CDS1     | CDP-diacylglycerol synthase 1                                       |
| Heart | ENSAMEG00000003736 | ACE      | angiotensin I converting enzyme                                     |
| Heart | ENSAMEG00000003762 | COQ10A   | coenzyme Q10A                                                       |
| Heart | ENSAMEG00000003817 | COL4A3   | collagen type IV alpha 3 chain                                      |
| Heart | ENSAMEG00000003831 | MYBL2    | MYB proto-oncogene like 2                                           |
| Heart | ENSAMEG00000003853 | SBK3     | SH3 domain binding kinase family member 3                           |
| Heart | ENSAMEG00000003860 | CCDC152  | coiled-coil domain containing 152                                   |
| Heart | ENSAMEG00000003863 | --       | --                                                                  |
| Heart | ENSAMEG00000003907 | JPH2     | junctionophilin 2                                                   |
| Heart | ENSAMEG00000003928 | CLEC1B   | C-type lectin domain family 1 member B                              |
| Heart | ENSAMEG00000004085 | CORO6    | coronin 6                                                           |
| Heart | ENSAMEG00000004173 | --       | --                                                                  |
| Heart | ENSAMEG00000004179 | CRYAB    | Ailuropoda melanoleuca crystallin alpha B (CRYAB), mRNA.            |
| Heart | ENSAMEG00000004234 | LRTM2    | leucine rich repeats and transmembrane domains 2                    |
| Heart | ENSAMEG00000004245 | GMPR     | guanosine monophosphate reductase                                   |
| Heart | ENSAMEG00000004263 | WNT5B    | Wnt family member 5B                                                |
| Heart | ENSAMEG00000004278 | ABHD15   | abhydrolase domain containing 15                                    |
| Heart | ENSAMEG00000004365 | PHLDB3   | pleckstrin homology like domain family B member 3                   |
| Heart | ENSAMEG00000004412 | MYCL     | MYCL proto-oncogene, bHLH transcription factor                      |
| Heart | ENSAMEG00000004418 | PRKCG    | protein kinase C gamma                                              |
| Heart | ENSAMEG00000004451 | CACNG6   | calcium voltage-gated channel auxiliary subunit gamma 6             |
| Heart | ENSAMEG00000004467 | APOBEC2  | apolipoprotein B mRNA editing enzyme catalytic subunit 2            |
| Heart | ENSAMEG00000004517 | ASB15    | ankyrin repeat and SOCS box containing 15                           |
| Heart | ENSAMEG00000004543 | LMOD2    | leiomodin 2                                                         |
| Heart | ENSAMEG00000004573 | ATP1A3   | ATPase Na <sup>+</sup> /K <sup>+</sup> transporting subunit alpha 3 |

|       |                    |              |                                                                                 |
|-------|--------------------|--------------|---------------------------------------------------------------------------------|
| Heart | ENSAMEG00000004596 | CAND2        | cullin associated and neddylation dissociated 2 (putative)                      |
| Heart | ENSAMEG00000004640 | IQSEC3       | IQ motif and Sec7 domain 3                                                      |
| Heart | ENSAMEG00000004687 | DCUN1D2      | defective in cullin neddylation 1 domain containing 2                           |
| Heart | ENSAMEG00000004699 | --           | --                                                                              |
| Heart | ENSAMEG00000004712 | ADPRHL1      | ADP-ribosylhydrolase like 1                                                     |
| Heart | ENSAMEG00000004756 | CAMK2A       | calcium/calmodulin dependent protein kinase II alpha                            |
| Heart | ENSAMEG00000004856 | GPAT3        | glycerol-3-phosphate acyltransferase 3                                          |
| Heart | ENSAMEG00000004865 | ALDOC        | aldolase, fructose-bisphosphate C                                               |
| Heart | ENSAMEG00000004894 | ARHGAP9      | Rho GTPase activating protein 9                                                 |
| Heart | ENSAMEG00000004913 | --           | --                                                                              |
| Heart | ENSAMEG00000004945 | CCDC136      | coiled-coil domain containing 136                                               |
| Heart | ENSAMEG00000004952 | FLNC         | filamin C                                                                       |
| Heart | ENSAMEG00000005005 | --           | --                                                                              |
| Heart | ENSAMEG00000005018 | LOC100464625 | placenta-specific gene 8 protein                                                |
| Heart | ENSAMEG00000005152 | PHOSPHO1     | phosphoethanolamine/phosphocholine phosphatase                                  |
| Heart | ENSAMEG00000005175 | SLC26A10     | solute carrier family 26 member 10                                              |
| Heart | ENSAMEG00000005179 | TLR3         | toll like receptor 3                                                            |
| Heart | ENSAMEG00000005186 | ACTC1        | actin, alpha, cardiac muscle 1                                                  |
| Heart | ENSAMEG00000005191 | SORBS2       | sorbin and SH3 domain containing 2                                              |
| Heart | ENSAMEG00000005193 | ENPP5        | ectonucleotide pyrophosphatase/phosphodiesterase 5 (putative)                   |
| Heart | ENSAMEG00000005244 | --           | --                                                                              |
| Heart | ENSAMEG00000005259 | FOLH1        | folate hydrolase 1                                                              |
| Heart | ENSAMEG00000005285 | STRIP2       | striatin interacting protein 2                                                  |
| Heart | ENSAMEG00000005321 | ANKRD23      | ankyrin repeat domain 23                                                        |
| Heart | ENSAMEG00000005409 | RAB11FIP4    | RAB11 family interacting protein 4                                              |
| Heart | ENSAMEG00000005530 | BICDL2       | BICD family like cargo adaptor 2                                                |
| Heart | ENSAMEG00000005545 | MMP25        | matrix metalloproteinase 25                                                     |
| Heart | ENSAMEG00000005568 | SYNM         | synemin                                                                         |
| Heart | ENSAMEG00000005581 | HAAO         | 3-hydroxyanthranilate 3,4-dioxygenase                                           |
| Heart | ENSAMEG00000005601 | KCNJ3        | potassium voltage-gated channel subfamily J member 3                            |
| Heart | ENSAMEG00000005631 | GNG7         | G protein subunit gamma 7                                                       |
| Heart | ENSAMEG00000005637 | LSMEM1       | leucine rich single-pass membrane protein 1                                     |
| Heart | ENSAMEG00000005675 | WIPF3        | WAS/WASL interacting protein family member 3                                    |
| Heart | ENSAMEG00000005679 | CALHM6       | calcium homeostasis modulator family member 6                                   |
| Heart | ENSAMEG00000005697 | DENND2D      | DENN domain containing 2D                                                       |
| Heart | ENSAMEG00000005814 | KLHL31       | kelch like family member 31                                                     |
| Heart | ENSAMEG00000005833 | CITED1       | Cbp/p300 interacting transactivator with Glu/Asp rich carboxy-terminal domain 1 |
| Heart | ENSAMEG00000005890 | PDLIM5       | PDZ and LIM domain 5                                                            |
| Heart | ENSAMEG00000005897 | DKK3         | dickkopf WNT signaling pathway inhibitor 3                                      |
| Heart | ENSAMEG00000005900 | TRPV4        | transient receptor potential cation channel subfamily V member 4                |

|       |                    |              |                                               |
|-------|--------------------|--------------|-----------------------------------------------|
| Heart | ENSAMEG00000005941 | DHX58        | DExH-box helicase 58                          |
| Heart | ENSAMEG00000005948 | SNX10        | sorting nexin 10                              |
| Heart | ENSAMEG00000006005 | USP28        | ubiquitin specific peptidase 28               |
| Heart | ENSAMEG00000006050 | EPM2A        | EPM2A, laforin glucan phosphatase             |
| Heart | ENSAMEG00000006056 | DAPK3        | death associated protein kinase 3             |
| Heart | ENSAMEG00000006071 | NEBL         | nebulette                                     |
| Heart | ENSAMEG00000006223 | EPCAM        | epithelial cell adhesion molecule             |
| Heart | ENSAMEG00000006291 | PPP4R4       | protein phosphatase 4 regulatory subunit 4    |
| Heart | ENSAMEG00000006321 | --           | --                                            |
| Heart | ENSAMEG00000006323 | ENO3         | enolase 3                                     |
| Heart | ENSAMEG00000006354 | FAH          | fumarylacetoacetate hydrolase                 |
| Heart | ENSAMEG00000006366 | SAPCD1       | suppressor APC domain containing 1            |
| Heart | ENSAMEG00000006372 | VWA7         | von Willebrand factor A domain containing 7   |
| Heart | ENSAMEG00000006380 | --           | --                                            |
| Heart | ENSAMEG00000006439 | EGLN3        | egl-9 family hypoxia inducible factor 3       |
| Heart | ENSAMEG00000006482 | FAM83H       | family with sequence similarity 83 member H   |
| Heart | ENSAMEG00000006487 | CDH13        | cadherin 13                                   |
| Heart | ENSAMEG00000006563 | ADRA1B       | adrenoceptor alpha 1B                         |
| Heart | ENSAMEG00000006607 | --           | --                                            |
| Heart | ENSAMEG00000006647 | --           | --                                            |
| Heart | ENSAMEG00000006681 | --           | --                                            |
| Heart | ENSAMEG00000006692 | CRHR2        | corticotropin releasing hormone receptor 2    |
| Heart | ENSAMEG00000006710 | LOC100476424 | death-associated protein kinase 1             |
| Heart | ENSAMEG00000006735 | SCD          | stearoyl-CoA desaturase                       |
| Heart | ENSAMEG00000006751 | PGD          | phosphogluconate dehydrogenase                |
| Heart | ENSAMEG00000006816 | LOC105240557 | sushi domain-containing protein 1             |
| Heart | ENSAMEG00000006823 | BAG2         | BCL2 associated athanogene 2                  |
| Heart | ENSAMEG00000006849 | ESYT3        | extended synaptotagmin 3                      |
| Heart | ENSAMEG00000006972 | WWC1         | WW and C2 domain containing 1                 |
| Heart | ENSAMEG00000006976 | PDE1C        | phosphodiesterase 1C                          |
| Heart | ENSAMEG00000006983 | ARHGDI3      | Rho GDP dissociation inhibitor gamma          |
| Heart | ENSAMEG00000006994 | PDIA2        | protein disulfide isomerase family A member 2 |
| Heart | ENSAMEG00000007003 | CLTB         | clathrin light chain B                        |
| Heart | ENSAMEG00000007007 | DDN          | dendrin                                       |
| Heart | ENSAMEG00000007033 | --           | --                                            |
| Heart | ENSAMEG00000007055 | MFAP5        | microfibril associated protein 5              |
| Heart | ENSAMEG00000007062 | TMEM171      | transmembrane protein 171                     |
| Heart | ENSAMEG00000007087 | MAATS1       | MYCBP associated and testis expressed 1       |
| Heart | ENSAMEG00000007101 | DENND1C      | DENN domain containing 1C                     |
| Heart | ENSAMEG00000007118 | GDF3         | growth differentiation factor 3               |
| Heart | ENSAMEG00000007148 | POPDC2       | popeye domain containing 2                    |
| Heart | ENSAMEG00000007223 | SLC7A7       | solute carrier family 7 member 7              |
| Heart | ENSAMEG00000007224 | TPM1         | tropomyosin 1                                 |

|       |                    |         |                                                        |
|-------|--------------------|---------|--------------------------------------------------------|
| Heart | ENSAMEG00000007231 | AK5     | adenylate kinase 5                                     |
| Heart | ENSAMEG00000007238 | SMTNL2  | smoothelin like 2                                      |
| Heart | ENSAMEG00000007248 | KCNK1   | potassium two pore domain channel subfamily K member 1 |
| Heart | ENSAMEG00000007311 | --      | --                                                     |
| Heart | ENSAMEG00000007328 | XK      | X-linked Kx blood group                                |
| Heart | ENSAMEG00000007337 | NEXN    | nexilin F-actin binding protein                        |
| Heart | ENSAMEG00000007362 | MYBPC3  | myosin binding protein C, cardiac                      |
| Heart | ENSAMEG00000007430 | SHANK2  | SH3 and multiple ankyrin repeat domains 2              |
| Heart | ENSAMEG00000007487 | TRDN    | triadin                                                |
| Heart | ENSAMEG00000007526 | SYNC    | syncoilin, intermediate filament protein               |
| Heart | ENSAMEG00000007591 | RAB31   | RAB31, member RAS oncogene family                      |
| Heart | ENSAMEG00000007739 | CDH1    | cadherin 1                                             |
| Heart | ENSAMEG00000007820 | CDH3    | cadherin 3                                             |
| Heart | ENSAMEG00000007918 | NDUFA11 | NADH:ubiquinone oxidoreductase subunit A11             |
| Heart | ENSAMEG00000007927 | ADSSL1  | adenylosuccinate synthase like 1                       |
| Heart | ENSAMEG00000007941 | ZC2HC1A | zinc finger C2HC-type containing 1A                    |
| Heart | ENSAMEG00000008002 | MAP3K9  | mitogen-activated protein kinase kinase kinase 9       |
| Heart | ENSAMEG00000008013 | --      | --                                                     |
| Heart | ENSAMEG00000008041 | LNX1    | ligand of numb-protein X 1                             |
| Heart | ENSAMEG00000008069 | SLC12A7 | solute carrier family 12 member 7                      |
| Heart | ENSAMEG00000008182 | SGCB    | sarcoglycan beta                                       |
| Heart | ENSAMEG00000008217 | --      | --                                                     |
| Heart | ENSAMEG00000008255 | --      | --                                                     |
| Heart | ENSAMEG00000008308 | TADA2B  | transcriptional adaptor 2B                             |
| Heart | ENSAMEG00000008322 | ID2     | inhibitor of DNA binding 2                             |
| Heart | ENSAMEG00000008339 | SLC9A3  | solute carrier family 9 member A3                      |
| Heart | ENSAMEG00000008373 | MBOAT2  | membrane bound O-acyltransferase domain containing 2   |
| Heart | ENSAMEG00000008429 | --      | --                                                     |
| Heart | ENSAMEG00000008481 | DUSP26  | dual specificity phosphatase 26                        |
| Heart | ENSAMEG00000008489 | RPL3L   | ribosomal protein L3 like                              |
| Heart | ENSAMEG00000008513 | RAMP1   | receptor activity modifying protein 1                  |
| Heart | ENSAMEG00000008518 | SCTR    | secretin receptor                                      |
| Heart | ENSAMEG00000008533 | STXBP2  | syntaxin binding protein 2                             |
| Heart | ENSAMEG00000008571 | FRY     | FRY microtubule binding protein                        |
| Heart | ENSAMEG00000008587 | PCDH8   | protocadherin 8                                        |
| Heart | ENSAMEG00000008605 | RBFOX1  | RNA binding fox-1 homolog 1                            |
| Heart | ENSAMEG00000008717 | FBXO17  | F-box protein 17                                       |
| Heart | ENSAMEG00000008743 | SLC25A4 | solute carrier family 25 member 4                      |
| Heart | ENSAMEG00000008763 | TNNC1   | troponin C, slow skeletal and cardiac muscles          |
| Heart | ENSAMEG00000008769 | ASB5    | ankyrin repeat and SOCS box containing 5               |
| Heart | ENSAMEG00000008809 | RGMA    | repulsive guidance molecule BMP co-receptor a          |
| Heart | ENSAMEG00000008818 | RASAL1  | RAS protein activator like 1                           |

|       |                    |              |                                                                |
|-------|--------------------|--------------|----------------------------------------------------------------|
| Heart | ENSAMEG00000008838 | COLQ         | collagen like tail subunit of asymmetric acetylcholinesterase  |
| Heart | ENSAMEG00000008850 | THSD4        | thrombospondin type 1 domain containing 4                      |
| Heart | ENSAMEG00000008879 | PKP2         | plakophilin 2                                                  |
| Heart | ENSAMEG00000008898 | CYP1A1       | cytochrome P450 family 1 subfamily A member 1                  |
| Heart | ENSAMEG00000008901 | LRRC39       | leucine rich repeat containing 39                              |
| Heart | ENSAMEG00000008917 | TRMT13       | tRNA methyltransferase 13 homolog                              |
| Heart | ENSAMEG00000008934 | MTUS2        | microtubule associated scaffold protein 2                      |
| Heart | ENSAMEG00000009011 | USP50        | ubiquitin specific peptidase 50                                |
| Heart | ENSAMEG00000009119 | KIF26B       | kinesin family member 26B                                      |
| Heart | ENSAMEG00000009131 | ACTA1        | actin, alpha 1, skeletal muscle                                |
| Heart | ENSAMEG00000009148 | --           | --                                                             |
| Heart | ENSAMEG00000009153 | TMEM35A      | transmembrane protein 35A                                      |
| Heart | ENSAMEG00000009193 | DMXL2        | Dmx like 2                                                     |
| Heart | ENSAMEG00000009200 | CAMK2D       | calcium/calmodulin dependent protein kinase II delta           |
| Heart | ENSAMEG00000009310 | ABRA         | actin binding Rho activating protein                           |
| Heart | ENSAMEG00000009361 | MYH7B        | myosin heavy chain 7B                                          |
| Heart | ENSAMEG00000009393 | YBX3         | Y-box binding protein 3                                        |
| Heart | ENSAMEG00000009440 | LOC100472452 | cytochrome P450 2D15                                           |
| Heart | ENSAMEG00000009448 | SYTL3        | synaptotagmin like 3                                           |
| Heart | ENSAMEG00000009471 | --           | --                                                             |
| Heart | ENSAMEG00000009531 | MCCD1        | mitochondrial coiled-coil domain 1                             |
| Heart | ENSAMEG00000009536 | FAM110C      | family with sequence similarity 110 member C                   |
| Heart | ENSAMEG00000009581 | SYNJ2        | synaptojanin 2                                                 |
| Heart | ENSAMEG00000009592 | HEY2         | hes related family bHLH transcription factor with YRPW motif 2 |
| Heart | ENSAMEG00000009617 | SMIM5        | small integral membrane protein 5                              |
| Heart | ENSAMEG00000009672 | RBM47        | RNA binding motif protein 47                                   |
| Heart | ENSAMEG00000009691 | BCAR3        | BCAR3, NSP family adaptor protein                              |
| Heart | ENSAMEG00000009740 | OSBPL10      | oxysterol binding protein like 10                              |
| Heart | ENSAMEG00000009835 | FUCA1        | alpha-L-fucosidase 1                                           |
| Heart | ENSAMEG00000009857 | RNF207       | ring finger protein 207                                        |
| Heart | ENSAMEG00000009867 | LOC105236178 | putative ATP-dependent RNA helicase TDRD12                     |
| Heart | ENSAMEG00000009873 | NPPB         | natriuretic peptide B                                          |
| Heart | ENSAMEG00000009891 | MYOM3        | myomesin 3                                                     |
| Heart | ENSAMEG00000009901 | GRB7         | growth factor receptor bound protein 7                         |
| Heart | ENSAMEG00000009912 | OPN4         | opsin 4                                                        |
| Heart | ENSAMEG00000009931 | TTC22        | tetratricopeptide repeat domain 22                             |
| Heart | ENSAMEG00000009934 | REEP1        | receptor accessory protein 1                                   |
| Heart | ENSAMEG00000009941 | LDB3         | LIM domain binding 3                                           |
| Heart | ENSAMEG00000009967 | GRAMD2B      | GRAM domain containing 2B                                      |
| Heart | ENSAMEG00000009998 | EMILIN2      | elastin microfibril interfacier 2                              |
| Heart | ENSAMEG00000010023 | MAP7         | microtubule associated protein 7                               |



|       |                    |            |                                                                       |
|-------|--------------------|------------|-----------------------------------------------------------------------|
| Heart | ENSAMEG00000010030 | PNMT       | phenylethanolamine N-methyltransferase                                |
| Heart | ENSAMEG00000010033 | MFN2       | mitofusin 2                                                           |
| Heart | ENSAMEG00000010035 | SMYD1      | SET and MYND domain containing 1                                      |
| Heart | ENSAMEG00000010039 | TCAP       | titin-cap                                                             |
| Heart | ENSAMEG00000010068 | MMP7       | matrix metalloproteinase 7                                            |
| Heart | ENSAMEG00000010085 | SV2A       | synaptic vesicle glycoprotein 2A                                      |
| Heart | ENSAMEG00000010097 | MYL9       | myosin light chain 9                                                  |
| Heart | ENSAMEG00000010108 | TMEM38A    | transmembrane protein 38A                                             |
| Heart | ENSAMEG00000010121 | LGALS1     | galectin 1                                                            |
| Heart | ENSAMEG00000010132 | TNFRSF8    | TNF receptor superfamily member 8                                     |
| Heart | ENSAMEG00000010183 | CHST15     | carbohydrate sulfotransferase 15                                      |
| Heart | ENSAMEG00000010197 | FGF1       | fibroblast growth factor 1                                            |
| Heart | ENSAMEG00000010277 | TANC1      | tetratricopeptide repeat, ankyrin repeat and coiled-coil containing 1 |
| Heart | ENSAMEG00000010346 | --         | --                                                                    |
| Heart | ENSAMEG00000010380 | TRIM63     | tripartite motif containing 63                                        |
| Heart | ENSAMEG00000010420 | ANO9       | anoctamin 9                                                           |
| Heart | ENSAMEG00000010473 | BZW2       | basic leucine zipper and W2 domains 2                                 |
| Heart | ENSAMEG00000010512 | CEP85      | centrosomal protein 85                                                |
| Heart | ENSAMEG00000010530 | MBP        | myelin basic protein                                                  |
| Heart | ENSAMEG00000010550 | GCOM1      | GRINL1A complex locus 1                                               |
| Heart | ENSAMEG00000010570 | MYOM1      | myomesin 1                                                            |
| Heart | ENSAMEG00000010606 | EPOR       | erythropoietin receptor                                               |
| Heart | ENSAMEG00000010611 | HACD1      | 3-hydroxyacyl-CoA dehydratase 1                                       |
| Heart | ENSAMEG00000010622 | KLHL41     | kelch like family member 41                                           |
| Heart | ENSAMEG00000010699 | EPS8L2     | EPS8 like 2                                                           |
| Heart | ENSAMEG00000010803 | FAM174B    | family with sequence similarity 174 member B                          |
| Heart | ENSAMEG00000010852 | CASQ2      | calsequestrin 2                                                       |
| Heart | ENSAMEG00000010858 | TACC2      | transforming acidic coiled-coil containing protein 2                  |
| Heart | ENSAMEG00000010862 | SRL        | sarcalumenin                                                          |
| Heart | ENSAMEG00000010870 | STYXL1     | serine/threonine/tyrosine interacting like 1                          |
| Heart | ENSAMEG00000010890 | GYG1       | glycogenin 1                                                          |
| Heart | ENSAMEG00000010896 | USP13      | ubiquitin specific peptidase 13                                       |
| Heart | ENSAMEG00000010933 | IRX4       | iroquois homeobox 4                                                   |
| Heart | ENSAMEG00000010959 | FGFR2      | fibroblast growth factor receptor 2                                   |
| Heart | ENSAMEG00000010966 | CP         | ceruloplasmin                                                         |
| Heart | ENSAMEG00000011080 | ARL6IP1    | ADP ribosylation factor like GTPase 6 interacting protein 1           |
| Heart | ENSAMEG00000011145 | FBXO32     | F-box protein 32                                                      |
| Heart | ENSAMEG00000011186 | KLHL38     | kelch like family member 38                                           |
| Heart | ENSAMEG00000011223 | PROB1      | proline rich basic protein 1                                          |
| Heart | ENSAMEG00000011266 | SESN2      | sestrin 2                                                             |
| Heart | ENSAMEG00000011277 | CUNH4orf19 | chromosome unknown C4orf19 homolog                                    |
| Heart | ENSAMEG00000011367 | TRNAU1AP   | tRNA selenocysteine 1 associated protein 1                            |

|       |                    |              |                                                           |
|-------|--------------------|--------------|-----------------------------------------------------------|
| Heart | ENSAMEG00000011403 | F5           | coagulation factor V                                      |
| Heart | ENSAMEG00000011404 | ROBO2        | roundabout guidance receptor 2                            |
| Heart | ENSAMEG00000011407 | LRRC7        | leucine rich repeat containing 7                          |
| Heart | ENSAMEG00000011433 | BVES         | blood vessel epicardial substance                         |
| Heart | ENSAMEG00000011452 | CDNF         | cerebral dopamine neurotrophic factor                     |
| Heart | ENSAMEG00000011509 | --           | --                                                        |
| Heart | ENSAMEG00000011514 | TRAK1        | trafficking kinesin protein 1                             |
| Heart | ENSAMEG00000011537 | PTH1H        | parathyroid hormone like hormone                          |
| Heart | ENSAMEG00000011558 | C3orf18      | chromosome 3 open reading frame 18                        |
| Heart | ENSAMEG00000011616 | NT5C1A       | 5'-nucleotidase, cytosolic 1A                             |
| Heart | ENSAMEG00000011654 | PDE4DIP      | phosphodiesterase 4D interacting protein                  |
| Heart | ENSAMEG00000011759 | ART3         | ADP-ribosyltransferase 3                                  |
| Heart | ENSAMEG00000011766 | ASB14        | ankyrin repeat and SOCS box containing 14                 |
| Heart | ENSAMEG00000011773 | TXLNB        | taxilin beta                                              |
| Heart | ENSAMEG00000011778 | LSMEM2       | leucine rich single-pass membrane protein 2               |
| Heart | ENSAMEG00000011779 | HSPB7        | heat shock protein family B (small) member 7              |
| Heart | ENSAMEG00000011799 | ABRA1        | ABRA C-terminal like                                      |
| Heart | ENSAMEG00000011804 | ACSF2        | acyl-CoA synthetase family member 2                       |
| Heart | ENSAMEG00000011855 | ITGA7        | integrin subunit alpha 7                                  |
| Heart | ENSAMEG00000011861 | SLMAP        | sarcolemma associated protein                             |
| Heart | ENSAMEG00000011870 | SLC38A3      | solute carrier family 38 member 3                         |
| Heart | ENSAMEG00000011890 | LOC100470069 | protein phosphatase 1 regulatory subunit 12B              |
| Heart | ENSAMEG00000011902 | SSPN         | sarcospan                                                 |
| Heart | ENSAMEG00000011916 | CDH2         | cadherin 2                                                |
| Heart | ENSAMEG00000012004 | TLN2         | talin 2                                                   |
| Heart | ENSAMEG00000012039 | MRAP2        | melanocortin 2 receptor accessory protein 2               |
| Heart | ENSAMEG00000012057 | SGCA         | sarcoglycan alpha                                         |
| Heart | ENSAMEG00000012065 | --           | --                                                        |
| Heart | ENSAMEG00000012103 | DHRS7C       | dehydrogenase/reductase 7C                                |
| Heart | ENSAMEG00000012137 | CLEC3B       | C-type lectin domain family 3 member B                    |
| Heart | ENSAMEG00000012143 | CDCP1        | CUB domain containing protein 1                           |
| Heart | ENSAMEG00000012160 | TNNT2        | troponin T2, cardiac type                                 |
| Heart | ENSAMEG00000012195 | S100A1       | S100 calcium binding protein A1                           |
| Heart | ENSAMEG00000012237 | RPRD1B       | regulation of nuclear pre-mRNA domain containing 1B       |
| Heart | ENSAMEG00000012267 | PPFIA4       | PTPRF interacting protein alpha 4                         |
| Heart | ENSAMEG00000012308 | RANBP3L      | RAN binding protein 3 like                                |
| Heart | ENSAMEG00000012312 | CRIP3        | cysteine rich protein 3                                   |
| Heart | ENSAMEG00000012338 | TRIM55       | tripartite motif containing 55                            |
| Heart | ENSAMEG00000012346 | ESPL1        | extra spindle pole bodies like 1, separase                |
| Heart | ENSAMEG00000012356 | CAV3         | caveolin 3                                                |
| Heart | ENSAMEG00000012357 | CHI3L1       | chitinase 3 like 1                                        |
| Heart | ENSAMEG00000012369 | ADAMTS7      | ADAM metalloproteinase with thrombospondin type 1 motif 7 |

|       |                    |          |                                                                                                   |
|-------|--------------------|----------|---------------------------------------------------------------------------------------------------|
| Heart | ENSAMEG00000012393 | MST1     | macrophage stimulating 1                                                                          |
| Heart | ENSAMEG00000012440 | HHATL    | hedgehog acyltransferase like                                                                     |
| Heart | ENSAMEG00000012471 | KLHL40   | kelch like family member 40                                                                       |
| Heart | ENSAMEG00000012478 | LRRC2    | leucine rich repeat containing 2                                                                  |
| Heart | ENSAMEG00000012484 | ZBTB47   | zinc finger and BTB domain containing 47                                                          |
| Heart | ENSAMEG00000012508 | C19orf47 | chromosome 19 open reading frame 47                                                               |
| Heart | ENSAMEG00000012517 | TESC     | tescalcin                                                                                         |
| Heart | ENSAMEG00000012518 | ACSBG1   | acyl-CoA synthetase bubblegum family member 1                                                     |
| Heart | ENSAMEG00000012531 | SEC22C   | SEC22 homolog C, vesicle trafficking protein                                                      |
| Heart | ENSAMEG00000012540 | DAG1     | dystroglycan 1                                                                                    |
| Heart | ENSAMEG00000012543 | --       | --                                                                                                |
| Heart | ENSAMEG00000012553 | --       | --                                                                                                |
| Heart | ENSAMEG00000012554 | CKM      | creatine kinase, M-type                                                                           |
| Heart | ENSAMEG00000012559 | --       | --                                                                                                |
| Heart | ENSAMEG00000012576 | DNAJA4   | DnaJ heat shock protein family (Hsp40) member A4                                                  |
| Heart | ENSAMEG00000012586 | MYL3     | myosin light chain 3                                                                              |
| Heart | ENSAMEG00000012612 | NEURL2   | neuralized E3 ubiquitin protein ligase 2                                                          |
| Heart | ENSAMEG00000012726 | DEFB1    | beta-defensin 103                                                                                 |
| Heart | ENSAMEG00000012737 | APOC1    | apolipoprotein C1                                                                                 |
| Heart | ENSAMEG00000012740 | APOE     | apolipoprotein E                                                                                  |
| Heart | ENSAMEG00000012755 | SH3BGR2  | SH3 domain binding glutamate rich protein like 2                                                  |
| Heart | ENSAMEG00000012814 | PRPH2    | peripherin 2                                                                                      |
| Heart | ENSAMEG00000012933 | CACNB2   | calcium voltage-gated channel auxiliary subunit beta 2                                            |
| Heart | ENSAMEG00000012970 | JOSD2    | Josephin domain containing 2                                                                      |
| Heart | ENSAMEG00000012992 | SNTA1    | syntrophin alpha 1                                                                                |
| Heart | ENSAMEG00000013171 | ASB12    | ankyrin repeat and SOCS box containing 12                                                         |
| Heart | ENSAMEG00000013245 | TMEM182  | transmembrane protein 182                                                                         |
| Heart | ENSAMEG00000013259 | MAMDC4   | MAM domain containing 4                                                                           |
| Heart | ENSAMEG00000013297 | FHL2     | four and a half LIM domains 2                                                                     |
| Heart | ENSAMEG00000013354 | SOX11    | SRY-box 11                                                                                        |
| Heart | ENSAMEG00000013371 | PARD6B   | par-6 family cell polarity regulator beta                                                         |
| Heart | ENSAMEG00000013410 | TRIM6    | tripartite motif containing 6                                                                     |
| Heart | ENSAMEG00000013468 | C1orf21  | chromosome 1 open reading frame 21                                                                |
| Heart | ENSAMEG00000013506 | PRKACB   | protein kinase cAMP-activated catalytic subunit beta                                              |
| Heart | ENSAMEG00000013510 | CENPP    | centromere protein P                                                                              |
| Heart | ENSAMEG00000013511 | PTX3     | pentraxin 3                                                                                       |
| Heart | ENSAMEG00000013527 | MLF1     | myeloid leukemia factor 1                                                                         |
| Heart | ENSAMEG00000013533 | SMARCD3  | SWI/SNF related, matrix associated, actin dependent regulator of chromatin, subfamily d, member 3 |
| Heart | ENSAMEG00000013547 | --       | --                                                                                                |
| Heart | ENSAMEG00000013559 | C1RL     | complement C1r subcomponent like                                                                  |
| Heart | ENSAMEG00000013564 | TMEM52   | transmembrane protein 52                                                                          |
| Heart | ENSAMEG00000013581 | DNASE2B  | deoxyribonuclease 2 beta                                                                          |

|       |                    |              |                                                                           |
|-------|--------------------|--------------|---------------------------------------------------------------------------|
| Heart | ENSAMEG00000013620 | IQCA1L       | IQ motif containing with AAA domain 1 like                                |
| Heart | ENSAMEG00000013644 | ASB10        | ankyrin repeat and SOCS box containing 10                                 |
| Heart | ENSAMEG00000013673 | --           | --                                                                        |
| Heart | ENSAMEG00000013677 | --           | --                                                                        |
| Heart | ENSAMEG00000013680 | PDGFRL       | platelet derived growth factor receptor like                              |
| Heart | ENSAMEG00000013682 | DERL3        | derlin 3                                                                  |
| Heart | ENSAMEG00000013784 | LOC100480698 | glutathione S-transferase theta-1                                         |
| Heart | ENSAMEG00000013791 | PFKM         | phosphofructokinase, muscle                                               |
| Heart | ENSAMEG00000013825 | MYL2         | myosin light chain 2                                                      |
| Heart | ENSAMEG00000013845 | CCDC63       | coiled-coil domain containing 63                                          |
| Heart | ENSAMEG00000013928 | PNLIP        | pancreatic lipase                                                         |
| Heart | ENSAMEG00000013991 | --           | --                                                                        |
| Heart | ENSAMEG00000013992 | KCNH2        | potassium voltage-gated channel subfamily H member 2                      |
| Heart | ENSAMEG00000013993 | GNB3         | G protein subunit beta 3                                                  |
| Heart | ENSAMEG00000014004 | PNLIPRP2     | pancreatic lipase related protein 2 (gene/pseudogene)                     |
| Heart | ENSAMEG00000014007 | ATP2A2       | ATPase sarcoplasmic/endoplasmic reticulum Ca <sup>2+</sup> transporting 2 |
| Heart | ENSAMEG00000014015 | NMB          | neuromedin B                                                              |
| Heart | ENSAMEG00000014026 | TTC39C       | tetratricopeptide repeat domain 39C                                       |
| Heart | ENSAMEG00000014038 | ALPK3        | alpha kinase 3                                                            |
| Heart | ENSAMEG00000014046 | ENO4         | enolase family member 4                                                   |
| Heart | ENSAMEG00000014060 | SHTN1        | shootin 1                                                                 |
| Heart | ENSAMEG00000014092 | SGCG         | sarcoglycan gamma                                                         |
| Heart | ENSAMEG00000014116 | SH3BGR       | SH3 domain binding glutamate rich protein                                 |
| Heart | ENSAMEG00000014131 | LGALS3BP     | galectin 3 binding protein                                                |
| Heart | ENSAMEG00000014164 | CASQ1        | calsequestrin 1                                                           |
| Heart | ENSAMEG00000014165 | --           | --                                                                        |
| Heart | ENSAMEG00000014235 | HAND2        | heart and neural crest derivatives expressed 2                            |
| Heart | ENSAMEG00000014238 | --           | --                                                                        |
| Heart | ENSAMEG00000014245 | ILDR1        | immunoglobulin like domain containing receptor 1                          |
| Heart | ENSAMEG00000014250 | GLRB         | glycine receptor beta                                                     |
| Heart | ENSAMEG00000014341 | --           | --                                                                        |
| Heart | ENSAMEG00000014348 | EREG         | epiregulin                                                                |
| Heart | ENSAMEG00000014363 | HRC          | histidine rich calcium binding protein                                    |
| Heart | ENSAMEG00000014365 | EDA2R        | ectodysplasin A2 receptor                                                 |
| Heart | ENSAMEG00000014426 | MRPL51       | mitochondrial ribosomal protein L51                                       |
| Heart | ENSAMEG00000014490 | IL5RA        | interleukin 5 receptor subunit alpha                                      |
| Heart | ENSAMEG00000014491 | GALNT16      | polypeptide N-acetylgalactosaminyltransferase 16                          |
| Heart | ENSAMEG00000014525 | MYOM2        | myomesin 2                                                                |
| Heart | ENSAMEG00000014564 | RFFL         | ring finger and FYVE like domain containing E3 ubiquitin protein ligase   |
| Heart | ENSAMEG00000014582 | FTL          | Ailuropoda melanoleuca ferritin light chain (FTL), mRNA.                  |
| Heart | ENSAMEG00000014616 | DHDH         | dihydrodiol dehydrogenase                                                 |

|       |                    |              |                                                   |
|-------|--------------------|--------------|---------------------------------------------------|
| Heart | ENSAMEG00000014637 | UNC45B       | unc-45 myosin chaperone B                         |
| Heart | ENSAMEG00000014670 | KERA         | keratocan                                         |
| Heart | ENSAMEG00000014674 | LUM          | lumican                                           |
| Heart | ENSAMEG00000014684 | MYL4         | myosin light chain 4                              |
| Heart | ENSAMEG00000014750 | GRIA3        | glutamate ionotropic receptor AMPA type subunit 3 |
| Heart | ENSAMEG00000014822 | RASL10B      | RAS like family 10 member B                       |
| Heart | ENSAMEG00000014823 | FAM241A      | family with sequence similarity 241 member A      |
| Heart | ENSAMEG00000014870 | POLQ         | DNA polymerase theta                              |
| Heart | ENSAMEG00000014942 | CAVIN4       | caveolae associated protein 4                     |
| Heart | ENSAMEG00000014952 | FBXO40       | F-box protein 40                                  |
| Heart | ENSAMEG00000014960 | KLHL30       | kelch like family member 30                       |
| Heart | ENSAMEG00000014978 | ABCB9        | ATP binding cassette subfamily B member 9         |
| Heart | ENSAMEG00000014986 | ABLIM1       | actin binding LIM protein 1                       |
| Heart | ENSAMEG00000015037 | LOC100478250 | solute carrier family 22 member 3                 |
| Heart | ENSAMEG00000015072 | ABLIM2       | actin binding LIM protein family member 2         |
| Heart | ENSAMEG00000015076 | --           | --                                                |
| Heart | ENSAMEG00000015099 | KBTBD12      | kelch repeat and BTB domain containing 12         |
| Heart | ENSAMEG00000015190 | KIAA1147     | KIAA1147                                          |
| Heart | ENSAMEG00000015212 | ALPK2        | alpha kinase 2                                    |
| Heart | ENSAMEG00000015250 | --           | --                                                |
| Heart | ENSAMEG00000015252 | RILPL1       | Rab interacting lysosomal protein like 1          |
| Heart | ENSAMEG00000015302 | NRAP         | nebulin related anchoring protein                 |
| Heart | ENSAMEG00000015361 | MPZ          | myelin protein zero                               |
| Heart | ENSAMEG00000015374 | C3orf14      | chromosome 3 open reading frame 14                |
| Heart | ENSAMEG00000015381 | PCP4L1       | Purkinje cell protein 4 like 1                    |
| Heart | ENSAMEG00000015419 | ACSL5        | acyl-CoA synthetase long chain family member 5    |
| Heart | ENSAMEG00000015633 | CMYA5        | cardiomyopathy associated 5                       |
| Heart | ENSAMEG00000015667 | --           | --                                                |
| Heart | ENSAMEG00000015670 | RBM20        | RNA binding motif protein 20                      |
| Heart | ENSAMEG00000015685 | AKAP6        | A-kinase anchoring protein 6                      |
| Heart | ENSAMEG00000015719 | JPH1         | junctionophilin 1                                 |
| Heart | ENSAMEG00000015725 | TIGAR        | TP53 induced glycolysis regulatory phosphatase    |
| Heart | ENSAMEG00000015746 | ENAH         | ENAH, actin regulator                             |
| Heart | ENSAMEG00000015788 | SMYD2        | SET and MYND domain containing 2                  |
| Heart | ENSAMEG00000015798 | ZNF106       | zinc finger protein 106                           |
| Heart | ENSAMEG00000015818 | ASB2         | ankyrin repeat and SOCS box containing 2          |
| Heart | ENSAMEG00000015838 | CKMT2        | creatine kinase, mitochondrial 2                  |
| Heart | ENSAMEG00000015891 | TMEM65       | transmembrane protein 65                          |
| Heart | ENSAMEG00000015901 | DNAJB5       | DnaJ heat shock protein family (Hsp40) member B5  |
| Heart | ENSAMEG00000015907 | PHF24        | PHD finger protein 24                             |
| Heart | ENSAMEG00000015921 | ACE2         | angiotensin I converting enzyme 2                 |
| Heart | ENSAMEG00000015924 | EYA4         | EYA transcriptional coactivator and phosphatase 4 |
| Heart | ENSAMEG00000016006 | SORBS1       | sorbin and SH3 domain containing 1                |

|       |                    |          |                                                               |
|-------|--------------------|----------|---------------------------------------------------------------|
| Heart | ENSAMEG00000016056 | PHKG1    | phosphorylase kinase catalytic subunit gamma 1                |
| Heart | ENSAMEG00000016081 | ITGB1BP2 | integrin subunit beta 1 binding protein 2                     |
| Heart | ENSAMEG00000016087 | PDLIM1   | PDZ and LIM domain 1                                          |
| Heart | ENSAMEG00000016096 | YIPF7    | Yip1 domain family member 7                                   |
| Heart | ENSAMEG00000016128 | WSCD2    | WSC domain containing 2                                       |
| Heart | ENSAMEG00000016175 | LDHB     | lactate dehydrogenase B                                       |
| Heart | ENSAMEG00000016190 | AAK1     | AP2 associated kinase 1                                       |
| Heart | ENSAMEG00000016226 | DGKD     | diacylglycerol kinase delta                                   |
| Heart | ENSAMEG00000016258 | --       | --                                                            |
| Heart | ENSAMEG00000016276 | AIF1L    | allograft inflammatory factor 1 like                          |
| Heart | ENSAMEG00000016284 | COX6A2   | cytochrome c oxidase subunit 6A2                              |
| Heart | ENSAMEG00000016286 | --       | --                                                            |
| Heart | ENSAMEG00000016321 | MYOT     | myotilin                                                      |
| Heart | ENSAMEG00000016331 | MAOB     | monoamine oxidase B                                           |
| Heart | ENSAMEG00000016338 | PLA2G4E  | phospholipase A2 group IVE                                    |
| Heart | ENSAMEG00000016352 | PLPP7    | phospholipid phosphatase 7 (inactive)                         |
| Heart | ENSAMEG00000016398 | PHEX     | phosphate regulating endopeptidase homolog X-linked           |
| Heart | ENSAMEG00000016415 | IRX6     | iroquois homeobox 6                                           |
| Heart | ENSAMEG00000016467 | SMPX     | small muscle protein, X-linked                                |
| Heart | ENSAMEG00000016475 | FITM1    | fat storage inducing transmembrane protein 1                  |
| Heart | ENSAMEG00000016476 | KLHL34   | kelch like family member 34                                   |
| Heart | ENSAMEG00000016542 | SLC2A4   | solute carrier family 2 member 4                              |
| Heart | ENSAMEG00000016569 | --       | --                                                            |
| Heart | ENSAMEG00000016574 | HHIP     | hedgehog interacting protein                                  |
| Heart | ENSAMEG00000016582 | CACNA2D1 | calcium voltage-gated channel auxiliary subunit alpha2delta 1 |
| Heart | ENSAMEG00000016588 | DHRS2    | dehydrogenase/reductase 2                                     |
| Heart | ENSAMEG00000016591 | GNAO1    | G protein subunit alpha o1                                    |
| Heart | ENSAMEG00000016616 | AP1G2    | adaptor related protein complex 1 gamma 2 subunit             |
| Heart | ENSAMEG00000016650 | TNK1     | tyrosine kinase non receptor 1                                |
| Heart | ENSAMEG00000016662 | DPYD     | dihydropyrimidine dehydrogenase                               |
| Heart | ENSAMEG00000016678 | MYH7     | myosin heavy chain 7                                          |
| Heart | ENSAMEG00000016692 | HAND1    | heart and neural crest derivatives expressed 1                |
| Heart | ENSAMEG00000016717 | CDH8     | cadherin 8                                                    |
| Heart | ENSAMEG00000016730 | PDHA1    | pyruvate dehydrogenase E1 alpha 1 subunit                     |
| Heart | ENSAMEG00000016731 | KIF1A    | kinesin family member 1A                                      |
| Heart | ENSAMEG00000016742 | SPEG     | SPEG complex locus                                            |
| Heart | ENSAMEG00000016743 | SLC12A3  | solute carrier family 12 member 3                             |
| Heart | ENSAMEG00000016756 | CPLX1    | complexin 1                                                   |
| Heart | ENSAMEG00000016767 | ANKRD1   | ankyrin repeat domain 1                                       |
| Heart | ENSAMEG00000016775 | FXR2     | FMR1 autosomal homolog 2                                      |
| Heart | ENSAMEG00000016787 | HTR7     | 5-hydroxytryptamine receptor 7                                |
| Heart | ENSAMEG00000016792 | TTC16    | tetratricopeptide repeat domain 16                            |

|       |                    |              |                                                                      |
|-------|--------------------|--------------|----------------------------------------------------------------------|
| Heart | ENSAMEG00000016801 | DES          | desmin                                                               |
| Heart | ENSAMEG00000016819 | SLC16A12     | solute carrier family 16 member 12                                   |
| Heart | ENSAMEG00000016827 | SYNPO2L      | synaptopodin 2 like                                                  |
| Heart | ENSAMEG00000016871 | OBSL1        | obscurin like 1                                                      |
| Heart | ENSAMEG00000016879 | INHHA        | inhibin alpha subunit                                                |
| Heart | ENSAMEG00000016900 | EFNB3        | ephrin B3                                                            |
| Heart | ENSAMEG00000016909 | SLC4A3       | solute carrier family 4 member 3                                     |
| Heart | ENSAMEG00000016925 | MYOZ2        | myozenin 2                                                           |
| Heart | ENSAMEG00000016958 | DGAT2        | diacylglycerol O-acyltransferase 2                                   |
| Heart | ENSAMEG00000017112 | ASB11        | ankyrin repeat and SOCS box containing 11                            |
| Heart | ENSAMEG00000017136 | CDH16        | cadherin 16                                                          |
| Heart | ENSAMEG00000017153 | LOC105234678 | catenin alpha-3                                                      |
| Heart | ENSAMEG00000017157 | GPC5         | glypican 5                                                           |
| Heart | ENSAMEG00000017159 | RRAD         | RRAD, Ras related glycolysis inhibitor and calcium channel regulator |
| Heart | ENSAMEG00000017177 | RAB27B       | RAB27B, member RAS oncogene family                                   |
| Heart | ENSAMEG00000017262 | NDRG4        | NDRG family member 4                                                 |
| Heart | ENSAMEG00000017295 | MCOLN2       | mucolipin 2                                                          |
| Heart | ENSAMEG00000017354 | DSP          | desmoplakin                                                          |
| Heart | ENSAMEG00000017376 | GATA5        | GATA binding protein 5                                               |
| Heart | ENSAMEG00000017417 | MLIP         | muscular LMNA interacting protein                                    |
| Heart | ENSAMEG00000017433 | NRN1         | neuritin 1                                                           |
| Heart | ENSAMEG00000017441 | TUBA8        | tubulin alpha 8                                                      |
| Heart | ENSAMEG00000017469 | FCMR         | Fc fragment of IgM receptor                                          |
| Heart | ENSAMEG00000017493 | PPP1R27      | protein phosphatase 1 regulatory subunit 27                          |
| Heart | ENSAMEG00000017522 | PGAM2        | phosphoglycerate mutase 2                                            |
| Heart | ENSAMEG00000017553 | --           | --                                                                   |
| Heart | ENSAMEG00000017554 | PPM1L        | protein phosphatase, Mg <sup>2+</sup> /Mn <sup>2+</sup> dependent 1L |
| Heart | ENSAMEG00000017567 | SH3RF2       | SH3 domain containing ring finger 2                                  |
| Heart | ENSAMEG00000017578 | MYL7         | myosin light chain 7                                                 |
| Heart | ENSAMEG00000017582 | PLAC8L1      | PLAC8 like 1                                                         |
| Heart | ENSAMEG00000017648 | KCNIP2       | potassium voltage-gated channel interacting protein 2                |
| Heart | ENSAMEG00000017650 | SCN5A        | sodium voltage-gated channel alpha subunit 5                         |
| Heart | ENSAMEG00000017720 | AP1S2        | adaptor related protein complex 1 sigma 2 subunit                    |
| Heart | ENSAMEG00000017749 | --           | --                                                                   |
| Heart | ENSAMEG00000017831 | PYGM         | glycogen phosphorylase, muscle associated                            |
| Heart | ENSAMEG00000017850 | LRRC20       | leucine rich repeat containing 20                                    |
| Heart | ENSAMEG00000017870 | MBOAT1       | membrane bound O-acyltransferase domain containing 1                 |
| Heart | ENSAMEG00000017899 | CLEC2L       | C-type lectin domain family 2 member L                               |
| Heart | ENSAMEG00000017910 | TSPAN15      | tetraspanin 15                                                       |
| Heart | ENSAMEG00000017946 | CSRP3        | cysteine and glycine rich protein 3                                  |
| Heart | ENSAMEG00000017964 | PTGR1        | prostaglandin reductase 1                                            |
| Heart | ENSAMEG00000017984 | IRF6         | interferon regulatory factor 6                                       |

|       |                    |              |                                                                    |
|-------|--------------------|--------------|--------------------------------------------------------------------|
| Heart | ENSAMEG00000017987 | MYO18B       | myosin XVIIIIB                                                     |
| Heart | ENSAMEG00000018031 | LEPR         | leptin receptor                                                    |
| Heart | ENSAMEG00000018037 | CAMTA1       | calmodulin binding transcription activator 1                       |
| Heart | ENSAMEG00000018059 | --           | --                                                                 |
| Heart | ENSAMEG00000018087 | MYPN         | myopalladin                                                        |
| Heart | ENSAMEG00000018115 | PPP1R13B     | protein phosphatase 1 regulatory subunit 13B                       |
| Heart | ENSAMEG00000018130 | --           | --                                                                 |
| Heart | ENSAMEG00000018146 | --           | --                                                                 |
| Heart | ENSAMEG00000018159 | CKB          | creatine kinase B                                                  |
| Heart | ENSAMEG00000018183 | MSRB3        | methionine sulfoxide reductase B3                                  |
| Heart | ENSAMEG00000018258 | PPP1R14C     | protein phosphatase 1 regulatory inhibitor subunit 14C             |
| Heart | ENSAMEG00000018339 | FLVCR2       | feline leukemia virus subgroup C cellular receptor family member 2 |
| Heart | ENSAMEG00000018349 | TGFB3        | transforming growth factor beta 3                                  |
| Heart | ENSAMEG00000018434 | GATB         | glutamyl-tRNA amidotransferase subunit B                           |
| Heart | ENSAMEG00000018467 | SRPK3        | SRSF protein kinase 3                                              |
| Heart | ENSAMEG00000018531 | RAB9B        | RAB9B, member RAS oncogene family                                  |
| Heart | ENSAMEG00000018576 | HSPB3        | heat shock protein family B (small) member 3                       |
| Heart | ENSAMEG00000018579 | LOC100467187 | histone H2A type 1-E                                               |
| Heart | ENSAMEG00000018627 | --           | --                                                                 |
| Heart | ENSAMEG00000018695 | C10orf71     | chromosome 10 open reading frame 71                                |
| Heart | ENSAMEG00000018705 | DIRAS1       | DIRAS family GTPase 1                                              |
| Heart | ENSAMEG00000018725 | KCNE1        | potassium voltage-gated channel subfamily E regulatory subunit 1   |
| Heart | ENSAMEG00000018771 | SLITRK6      | SLIT and NTRK like family member 6                                 |
| Heart | ENSAMEG00000018801 | --           | --                                                                 |
| Heart | ENSAMEG00000018819 | C1orf210     | chromosome 1 open reading frame 210                                |
| Heart | ENSAMEG00000018822 | TMEM125      | transmembrane protein 125                                          |
| Heart | ENSAMEG00000018830 | GREM2        | gremlin 2, DAN family BMP antagonist                               |
| Heart | ENSAMEG00000018834 | MYADML2      | myeloid associated differentiation marker like 2                   |
| Heart | ENSAMEG00000018844 | TMEM37       | transmembrane protein 37                                           |
| Heart | ENSAMEG00000018850 | PLN          | phospholamban                                                      |
| Heart | ENSAMEG00000018994 | --           | --                                                                 |
| Heart | ENSAMEG00000018995 | UBXN10       | UBX domain protein 10                                              |
| Heart | ENSAMEG00000019008 | --           | --                                                                 |
| Heart | ENSAMEG00000019019 | PCDH9        | protocadherin 9                                                    |
| Heart | ENSAMEG00000019029 | GPR22        | G protein-coupled receptor 22                                      |
| Heart | ENSAMEG00000019176 | --           | --                                                                 |
| Heart | ENSAMEG00000019267 | KCNF1        | potassium voltage-gated channel modifier subfamily F member 1      |
| Heart | ENSAMEG00000019285 | OXER1        | oxoeicosanoid receptor 1                                           |
| Heart | ENSAMEG00000019317 | --           | --                                                                 |
| Heart | ENSAMEG00000019373 | TMEM246      | transmembrane protein 246                                          |



|       |                    |              |                                                                               |
|-------|--------------------|--------------|-------------------------------------------------------------------------------|
| Heart | ENSAMEG00000019381 | GPR182       | G protein-coupled receptor 182                                                |
| Heart | ENSAMEG00000019420 | GJA3         | gap junction protein alpha 3                                                  |
| Heart | ENSAMEG00000019470 | LRRC10       | leucine rich repeat containing 10                                             |
| Heart | ENSAMEG00000019510 | KCNJ11       | potassium voltage-gated channel subfamily J member 11                         |
| Heart | ENSAMEG00000019531 | TMEM200A     | transmembrane protein 200A                                                    |
| Heart | ENSAMEG00000019547 | KCNJ2        | potassium voltage-gated channel subfamily J member 2                          |
| Heart | ENSAMEG00000019608 | LOC100480801 | hydroxycarboxylic acid receptor 2                                             |
| Heart | ENSAMEG00000019692 | GJA1         | gap junction protein alpha 1                                                  |
| Heart | ENSAMEG00000019705 | RNASE12      | ribonuclease A family member 12 (inactive)                                    |
| Heart | ENSAMEG00000019733 | CHRM2        | cholinergic receptor muscarinic 2                                             |
| Heart | ENSAMEG00000019745 | LOC100482289 | histone H4                                                                    |
| Heart | ENSAMEG00000019789 | ACKR3        | atypical chemokine receptor 3                                                 |
| Heart | ENSAMEG00000019910 | GCNT2        | glucosaminyl (N-acetyl) transferase 2, I-branching enzyme (I blood group)     |
| Heart | ENSAMEG00000019975 | XIRP1        | xin actin binding repeat containing 1                                         |
| Heart | ENSAMEG00000020121 | TIGD6        | tigger transposable element derived 6                                         |
| Heart | Novel00001         | --           | hypothetical protein M91_07955                                                |
| Heart | Novel00008         | --           | --                                                                            |
| Heart | Novel00012         | --           | --                                                                            |
| Heart | Novel00039         | --           | --                                                                            |
| Heart | Novel00064         | --           | PREDICTED: alpha-1B adrenergic receptor                                       |
| Heart | Novel00082         | --           | hypothetical protein PANDA_000426, partial                                    |
| Heart | Novel00089         | --           | hCG2041078, partial                                                           |
| Heart | Novel00098         | --           | --                                                                            |
| Heart | Novel00099         | --           | PREDICTED: heart- and neural crest derivatives-expressed protein 2 isoform X1 |
| Heart | Novel00100         | --           | PREDICTED: uncharacterized protein LOC102163811                               |
| Heart | Novel00107         | --           | hypothetical protein M91_09901                                                |
| Heart | Novel00149         | --           | --                                                                            |
| Heart | Novel00155         | --           | --                                                                            |
| Heart | Novel00164         | --           | --                                                                            |
| Heart | Novel00165         | --           | --                                                                            |
| Heart | Novel00215         | --           | --                                                                            |
| Heart | Novel00288         | --           | PREDICTED: myosin light chain kinase 3 isoform X1                             |
| Heart | Novel00311         | --           | unnamed protein product                                                       |
| Heart | Novel00312         | --           | endonuclease/reverse transcriptase                                            |
| Heart | Novel00320         | --           | --                                                                            |
| Heart | Novel00326         | --           | unnamed protein product                                                       |
| Heart | Novel00327         | --           | --                                                                            |
| Heart | Novel00328         | --           | --                                                                            |
| Heart | Novel00381         | --           | --                                                                            |
| Heart | Novel00382         | --           | --                                                                            |

|       |            |    |                                                                                            |
|-------|------------|----|--------------------------------------------------------------------------------------------|
| Heart | Novel00396 | -- | PREDICTED: LOW QUALITY PROTEIN: dnaJ homolog subfamily C member 5G                         |
| Heart | Novel00404 | -- | --                                                                                         |
| Heart | Novel00417 | -- | PREDICTED: Kv channel-interacting protein 2 isoform X7                                     |
| Heart | Novel00475 | -- | unnamed protein product                                                                    |
| Heart | Novel00476 | -- | --                                                                                         |
| Heart | Novel00499 | -- | --                                                                                         |
| Heart | Novel00502 | -- | --                                                                                         |
| Heart | Novel00503 | -- | --                                                                                         |
| Heart | Novel00509 | -- | --                                                                                         |
| Heart | Novel00553 | -- | --                                                                                         |
| Heart | Novel00569 | -- | PREDICTED: uncharacterized protein C6orf106 homolog isoform X2                             |
| Heart | Novel00599 | -- | endonuclease/reverse transcriptase                                                         |
| Heart | Novel00658 | -- | PREDICTED: FYN-binding protein-like                                                        |
| Heart | Novel00659 | -- | --                                                                                         |
| Heart | Novel00692 | -- | unknown protein, partial                                                                   |
| Heart | Novel00721 | -- | --                                                                                         |
| Heart | Novel00787 | -- | hypothetical protein M91_20110                                                             |
| Heart | Novel00790 | -- | PREDICTED: 60S ribosomal protein L39-like                                                  |
| Heart | Novel00791 | -- | hypothetical protein M91_11778                                                             |
| Heart | Novel00830 | -- | --                                                                                         |
| Heart | Novel00839 | -- | --                                                                                         |
| Heart | Novel00845 | -- | --                                                                                         |
| Heart | Novel00851 | -- | hypothetical protein EGM_19048, partial                                                    |
| Heart | Novel00868 | -- | --                                                                                         |
| Heart | Novel00910 | -- | PREDICTED: LOW QUALITY PROTEIN: melanopsin                                                 |
| Heart | Novel00917 | -- | hypothetical protein PANDA_003430                                                          |
| Heart | Novel00944 | -- | PREDICTED: Z-DNA-binding protein 1 isoform X5                                              |
| Heart | Novel00977 | -- | Ac1262                                                                                     |
| Heart | Novel00987 | -- | --                                                                                         |
| Heart | Novel01035 | -- | PREDICTED: N-acetyllactosaminide beta-1,6-N-acetylglucosaminyl-transferase, isoform A-like |
| Heart | Novel01040 | -- | PREDICTED: N-acetyllactosaminide beta-1,6-N-acetylglucosaminyl-transferase, isoform A-like |
| Heart | Novel01048 | -- | --                                                                                         |
| Heart | Novel01060 | -- | --                                                                                         |
| Heart | Novel01116 | -- | PREDICTED: LOW QUALITY PROTEIN: ovochymase-2                                               |
| Heart | Novel01131 | -- | PREDICTED: uncharacterized protein LOC103013146                                            |
| Heart | Novel01157 | -- | --                                                                                         |
| Heart | Novel01158 | -- | --                                                                                         |
| Heart | Novel01183 | -- | Unknown (protein for MGC:16614)                                                            |
| Heart | Novel01257 | -- | --                                                                                         |

|       |            |    |                                                                                           |
|-------|------------|----|-------------------------------------------------------------------------------------------|
| Heart | Novel01292 | -- | --                                                                                        |
| Heart | Novel01299 | -- | --                                                                                        |
| Heart | Novel01370 | -- | --                                                                                        |
| Heart | Novel01385 | -- | endonuclease/reverse transcriptase                                                        |
| Heart | Novel01427 | -- | --                                                                                        |
| Heart | Novel01465 | -- | --                                                                                        |
| Heart | Novel01468 | -- | --                                                                                        |
| Heart | Novel01503 | -- | --                                                                                        |
| Heart | Novel01521 | -- | --                                                                                        |
| Heart | Novel01527 | -- | --                                                                                        |
| Heart | Novel01567 | -- | --                                                                                        |
| Heart | Novel01572 | -- | --                                                                                        |
| Heart | Novel01613 | -- | endonuclease/reverse transcriptase                                                        |
| Heart | Novel01624 | -- | --                                                                                        |
| Heart | Novel01653 | -- | --                                                                                        |
| Heart | Novel01657 | -- | hypothetical protein M91_02115                                                            |
| Heart | Novel01679 | -- | --                                                                                        |
| Heart | Novel01681 | -- | --                                                                                        |
| Heart | Novel01685 | -- | hypothetical protein                                                                      |
| Heart | Novel01694 | -- | hypothetical protein PANDA_008428, partial                                                |
| Heart | Novel01703 | -- | PREDICTED: cAMP-specific 3',5'-cyclic phosphodiesterase 4D-like                           |
| Heart | Novel01712 | -- | PREDICTED: killer cell lectin-like receptor 2                                             |
| Heart | Novel01728 | -- | Matrix-remodeling-associated protein 7                                                    |
| Heart | Novel01732 | -- | --                                                                                        |
| Heart | Novel01745 | -- | --                                                                                        |
| Heart | Novel01763 | -- | --                                                                                        |
| Heart | Novel01855 | -- | --                                                                                        |
| Heart | Novel01857 | -- | --                                                                                        |
| Heart | Novel01858 | -- | PREDICTED: sodium/calcium exchanger 1 isoform X5                                          |
| Heart | Novel01978 | -- | --                                                                                        |
| Heart | Novel01981 | -- | --                                                                                        |
| Heart | Novel02015 | -- | PREDICTED: LOW QUALITY PROTEIN: endogenous retrovirus group K member 113 Pol protein-like |
| Heart | Novel02017 | -- | --                                                                                        |
| Heart | Novel02025 | -- | --                                                                                        |
| Heart | Novel02032 | -- | --                                                                                        |
| Heart | Novel02116 | -- | --                                                                                        |
| Heart | Novel02121 | -- | hypothetical protein EGM_19048, partial                                                   |
| Heart | Novel02131 | -- | hypothetical protein                                                                      |
| Heart | Novel02210 | -- | --                                                                                        |
| Heart | Novel02257 | -- | PREDICTED: regulator of G-protein signaling 6 isoform X3                                  |
| Heart | Novel02274 | -- | --                                                                                        |

|       |            |    |                                                                             |
|-------|------------|----|-----------------------------------------------------------------------------|
| Heart | Novel02286 | -- | PREDICTED: dapper homolog 3-like                                            |
| Heart | Novel02318 | -- | PREDICTED: neuropilin-2 isoform X5                                          |
| Heart | Novel02323 | -- | --                                                                          |
| Heart | Novel02328 | -- | hypothetical protein M91_12176, partial                                     |
| Heart | Novel02355 | -- | --                                                                          |
| Heart | Novel02361 | -- | --                                                                          |
| Heart | Novel02497 | -- | --                                                                          |
| Heart | Novel02498 | -- | --                                                                          |
| Heart | Novel02530 | -- | --                                                                          |
| Heart | Novel02541 | -- | hypothetical protein PANDA_010201, partial                                  |
| Heart | Novel02611 | -- | --                                                                          |
| Heart | Novel02646 | -- | PREDICTED: LOW QUALITY PROTEIN: protein phosphatase 1 regulatory subunit 3A |
| Heart | Novel02648 | -- | hypothetical protein M91_14620                                              |
| Heart | Novel02662 | -- | --                                                                          |
| Heart | Novel02675 | -- | --                                                                          |
| Heart | Novel02697 | -- | RecName: Full=LINE-1 reverse transcriptase homolog                          |
| Heart | Novel02703 | -- | Retrovirus-related Pol polyprotein LINE-1                                   |
| Heart | Novel02741 | -- | --                                                                          |
| Heart | Novel02825 | -- | --                                                                          |
| Heart | Novel02846 | -- | unnamed protein product                                                     |
| Heart | Novel02866 | -- | --                                                                          |
| Heart | Novel02887 | -- | --                                                                          |
| Heart | Novel02905 | -- | PREDICTED: glypican-5                                                       |
| Heart | Novel02936 | -- | PREDICTED: LOW QUALITY PROTEIN: UPF0378 protein KIAA0100 homolog, partial   |
| Heart | Novel02950 | -- | --                                                                          |
| Heart | Novel02979 | -- | hypothetical protein M91_18376, partial                                     |
| Heart | Novel03003 | -- | unnamed protein product                                                     |
| Heart | Novel03004 | -- | hypothetical protein M91_02115                                              |
| Heart | Novel03005 | -- | hypothetical protein M91_18376, partial                                     |
| Heart | Novel03006 | -- | putative p150                                                               |
| Heart | Novel03007 | -- | --                                                                          |
| Heart | Novel03042 | -- | --                                                                          |
| Heart | Novel03044 | -- | PREDICTED: LOW QUALITY PROTEIN: muscular LMNA-interacting protein           |
| Heart | Novel03102 | -- | --                                                                          |
| Heart | Novel03127 | -- | PREDICTED: roundabout homolog 2-like                                        |
| Heart | Novel03159 | -- | hypothetical protein H920_06064                                             |
| Heart | Novel03283 | -- | --                                                                          |
| Heart | Novel03335 | -- | --                                                                          |
| Heart | Novel03379 | -- | unnamed protein product                                                     |
| Heart | Novel03387 | -- | --                                                                          |

|       |            |    |                                                                                 |
|-------|------------|----|---------------------------------------------------------------------------------|
| Heart | Novel03388 | -- | --                                                                              |
| Heart | Novel03410 | -- | --                                                                              |
| Heart | Novel03441 | -- | Retrovirus-related Pol polyprotein LINE-1                                       |
| Heart | Novel03453 | -- | PREDICTED: 40S ribosomal protein SA-like                                        |
| Heart | Novel03517 | -- | --                                                                              |
| Heart | Novel03525 | -- | --                                                                              |
| Heart | Novel03531 | -- | PREDICTED: FH1/FH2 domain-containing protein 3 isoform X9                       |
| Heart | Novel03537 | -- | --                                                                              |
| Heart | Novel03598 | -- | --                                                                              |
| Heart | Novel03631 | -- | --                                                                              |
| Heart | Novel03636 | -- | --                                                                              |
| Heart | Novel03690 | -- | --                                                                              |
| Heart | Novel03699 | -- | --                                                                              |
| Heart | Novel03701 | -- | --                                                                              |
| Heart | Novel03702 | -- | --                                                                              |
| Heart | Novel03713 | -- | PREDICTED: alpha-parvin isoform X3                                              |
| Heart | Novel03715 | -- | --                                                                              |
| Heart | Novel03716 | -- | hypothetical protein MDA_GLEAN10024817                                          |
| Heart | Novel03736 | -- | PREDICTED: transcription factor 15, partial                                     |
| Heart | Novel03757 | -- | --                                                                              |
| Heart | Novel03790 | -- | Ribosomal protein S6                                                            |
| Heart | Novel03799 | -- | PREDICTED: zinc finger and BTB domain-containing protein 47                     |
| Heart | Novel03841 | -- | PREDICTED: cadherin-8 isoform X2                                                |
| Heart | Novel03843 | -- | hypothetical protein PANDA_015316, partial                                      |
| Heart | Novel03858 | -- | --                                                                              |
| Heart | Novel03878 | -- | PREDICTED: integrin alpha-D                                                     |
| Heart | Novel03885 | -- | --                                                                              |
| Heart | Novel03898 | -- | hypothetical protein M91_09901                                                  |
| Heart | Novel03902 | -- | hypothetical protein PANDA_015499                                               |
| Heart | Novel03918 | -- | --                                                                              |
| Heart | Novel03935 | -- | --                                                                              |
| Heart | Novel03966 | -- | PREDICTED: uncharacterized protein LOC103679605                                 |
| Heart | Novel04009 | -- | hypothetical protein                                                            |
| Heart | Novel04059 | -- | PREDICTED: glypican-5                                                           |
| Heart | Novel04089 | -- | --                                                                              |
| Heart | Novel04095 | -- | PREDICTED: LOW QUALITY PROTEIN: cGMP-inhibited 3',5'-cyclic phosphodiesterase A |
| Heart | Novel04170 | -- | --                                                                              |
| Heart | Novel04208 | -- | putative p150                                                                   |
| Heart | Novel04222 | -- | --                                                                              |
| Heart | Novel04231 | -- | --                                                                              |

|       |            |    |                                                               |
|-------|------------|----|---------------------------------------------------------------|
| Heart | Novel04233 | -- | --                                                            |
| Heart | Novel04303 | -- | --                                                            |
| Heart | Novel04305 | -- | --                                                            |
| Heart | Novel04306 | -- | --                                                            |
| Heart | Novel04373 | -- | hypothetical protein M91_15722                                |
| Heart | Novel04400 | -- | PREDICTED: catenin alpha-3-like, partial                      |
| Heart | Novel04454 | -- | --                                                            |
| Heart | Novel04457 | -- | --                                                            |
| Heart | Novel04482 | -- | --                                                            |
| Heart | Novel04539 | -- | hypothetical protein M91_00785, partial                       |
| Heart | Novel04540 | -- | hypothetical protein M91_14419, partial                       |
| Heart | Novel04561 | -- | PREDICTED: radial spoke head 1 homolog isoform X1             |
| Heart | Novel04577 | -- | --                                                            |
| Heart | Novel04582 | -- | --                                                            |
| Heart | Novel04589 | -- | --                                                            |
| Heart | Novel04594 | -- | --                                                            |
| Heart | Novel04598 | -- | --                                                            |
| Heart | Novel04662 | -- | --                                                            |
| Heart | Novel04682 | -- | --                                                            |
| Heart | Novel04711 | -- | PREDICTED: histone H2A type 1-J isoform X1                    |
| Heart | Novel04714 | -- | --                                                            |
| Heart | Novel04716 | -- | unnamed protein product                                       |
| Heart | Novel04730 | -- | PREDICTED: receptor expression-enhancing protein 1 isoform X2 |
| Heart | Novel04731 | -- | PREDICTED: catenin alpha-3-like, partial                      |
| Heart | Novel04753 | -- | Da1-12                                                        |
| Heart | Novel04794 | -- | --                                                            |
| Heart | Novel04795 | -- | --                                                            |
| Heart | Novel04806 | -- | --                                                            |
| Heart | Novel04837 | -- | --                                                            |
| Heart | Novel04846 | -- | --                                                            |
| Heart | Novel04855 | -- | PREDICTED: melanoma inhibitory activity protein 3-like        |
| Heart | Novel04874 | -- | tRNA-splicing endonuclease subunit Sen15                      |
| Heart | Novel04895 | -- | --                                                            |
| Heart | Novel04910 | -- | --                                                            |
| Heart | Novel04930 | -- | --                                                            |
| Heart | Novel04934 | -- | unnamed protein product                                       |
| Heart | Novel04977 | -- | unnamed protein product                                       |
| Heart | Novel05015 | -- | --                                                            |
| Heart | Novel05017 | -- | --                                                            |
| Heart | Novel05024 | -- | --                                                            |
| Heart | Novel05047 | -- | --                                                            |
| Heart | Novel05093 | -- | --                                                            |

|       |                    |         |                                                               |
|-------|--------------------|---------|---------------------------------------------------------------|
| Heart | Novel05099         | --      | PREDICTED: RNA binding protein fox-1 homolog 2 isoform X8     |
| Heart | Novel05103         | --      | --                                                            |
| Heart | Novel05122         | --      | --                                                            |
| Heart | Novel05127         | --      | PREDICTED: uncharacterized protein LOC101368442               |
| Heart | Novel05162         | --      | PREDICTED: uncharacterized protein LOC102156706               |
| Heart | Novel05204         | --      | PREDICTED: RNA binding protein fox-1 homolog 1                |
| Heart | Novel05205         | --      | endonuclease/reverse transcriptase                            |
| Heart | Novel05219         | --      | LINE-1 element ORF2 (predicted)                               |
| Heart | Novel05249         | --      | PREDICTED: LOW QUALITY PROTEIN: obscurin-like                 |
| Heart | Novel05250         | --      | PREDICTED: LOW QUALITY PROTEIN: obscurin-like                 |
| Heart | Novel05256         | --      | hypothetical protein CB1_000794010                            |
| Heart | Novel05283         | --      | --                                                            |
| Heart | Novel05294         | --      | --                                                            |
| Heart | Novel05299         | --      | --                                                            |
| Heart | Novel05304         | --      | --                                                            |
| Heart | Novel05319         | --      | PREDICTED: putative uncharacterized protein C14orf132 homolog |
| Heart | Novel05328         | --      | --                                                            |
| Heart | Novel05341         | --      | --                                                            |
| Heart | Novel05361         | --      | --                                                            |
| Heart | Novel05378         | --      | --                                                            |
| Heart | Novel05379         | --      | --                                                            |
| Heart | Novel05417         | --      | --                                                            |
| Heart | Novel05490         | --      | --                                                            |
| Heart | Novel05516         | --      | --                                                            |
| Heart | Novel05641         | --      | --                                                            |
| Heart | Novel05684         | --      | --                                                            |
| Heart | Novel05783         | --      | --                                                            |
| Heart | Novel05813         | --      | --                                                            |
| Heart | Novel05817         | --      | PREDICTED: interferon-inducible GTPase 1-like                 |
| Heart | Novel05824         | --      | --                                                            |
| Heart | Novel05839         | --      | unnamed protein product                                       |
| Heart | Novel05866         | --      | --                                                            |
| Heart | Novel05911         | --      | --                                                            |
| Heart | Novel05929         | --      | tetratricopeptide repeat protein 39B-like protein, partial    |
| Heart | Novel05940         | --      | slow myosin heavy chain                                       |
| Heart | Novel05971         | --      | --                                                            |
| Heart | Novel06017         | --      | PREDICTED: epidermal growth factor receptor isoform X2        |
| Liver | ENSAMEG00000000008 | SLC13A3 | solute carrier family 13 member 3                             |
| Liver | ENSAMEG00000000041 | SYT11   | synaptotagmin 11                                              |
| Liver | ENSAMEG00000000094 | JAG2    | jagged 2                                                      |
| Liver | ENSAMEG00000000107 | HOGA1   | 4-hydroxy-2-oxoglutarate aldolase 1                           |

|       |                    |              |                                                     |
|-------|--------------------|--------------|-----------------------------------------------------|
| Liver | ENSAMEG00000000141 | CLU          | clusterin                                           |
| Liver | ENSAMEG00000000147 | LOC100478547 | L-gulonolactone oxidase                             |
| Liver | ENSAMEG00000000189 | SCN1B        | sodium voltage-gated channel beta subunit 1         |
| Liver | ENSAMEG00000000244 | HAMP         | hepcidin antimicrobial peptide                      |
| Liver | ENSAMEG00000000245 | MAG          | myelin associated glycoprotein                      |
| Liver | ENSAMEG00000000261 | TF           | transferrin                                         |
| Liver | ENSAMEG00000000315 | RAPGEF4      | Rap guanine nucleotide exchange factor 4            |
| Liver | ENSAMEG00000000316 | TRHDE        | thyrotropin releasing hormone degrading enzyme      |
| Liver | ENSAMEG00000000317 | --           | --                                                  |
| Liver | ENSAMEG00000000341 | LOC100468106 | inhibitor of carbonic anhydrase                     |
| Liver | ENSAMEG00000000342 | CYP2J2       | cytochrome P450 family 2 subfamily J member 2       |
| Liver | ENSAMEG00000000398 | COLEC10      | collectin subfamily member 10                       |
| Liver | ENSAMEG00000000438 | MS4A4A       | membrane spanning 4-domains A4A                     |
| Liver | ENSAMEG00000000451 | --           | --                                                  |
| Liver | ENSAMEG00000000470 | DTNA         | dystrobrevin alpha                                  |
| Liver | ENSAMEG00000000656 | --           | --                                                  |
| Liver | ENSAMEG00000000671 | PLPPR1       | phospholipid phosphatase related 1                  |
| Liver | ENSAMEG00000000677 | FOXA3        | forkhead box A3                                     |
| Liver | ENSAMEG00000000923 | ABCB4        | ATP binding cassette subfamily B member 4           |
| Liver | ENSAMEG00000000931 | FHOD3        | formin homology 2 domain containing 3               |
| Liver | ENSAMEG00000000982 | GOLT1A       | golgi transport 1A                                  |
| Liver | ENSAMEG00000000994 | KNG1         | kininogen 1                                         |
| Liver | ENSAMEG00000001013 | HRG          | histidine rich glycoprotein                         |
| Liver | ENSAMEG00000001033 | MTPP         | microsomal triglyceride transfer protein            |
| Liver | ENSAMEG00000001036 | FETUB        | fetuin B                                            |
| Liver | ENSAMEG00000001041 | AHSG         | alpha 2-HS glycoprotein                             |
| Liver | ENSAMEG00000001045 | C5           | complement C5                                       |
| Liver | ENSAMEG00000001179 | SLC30A1      | solute carrier family 30 member 1                   |
| Liver | ENSAMEG00000001253 | GCKR         | glucokinase regulator                               |
| Liver | ENSAMEG00000001290 | STEAP4       | STEAP4 metalloproteinase                            |
| Liver | ENSAMEG00000001367 | SPINK8       | serine peptidase inhibitor, Kazal type 8 (putative) |
| Liver | ENSAMEG00000001428 | FGF7         | fibroblast growth factor 7                          |
| Liver | ENSAMEG00000001439 | LOC100465875 | zinc finger protein 671                             |
| Liver | ENSAMEG00000001451 | FTCD         | formimidoyltransferase cyclodeaminase               |
| Liver | ENSAMEG00000001528 | MFSD4A       | major facilitator superfamily domain containing 4A  |
| Liver | ENSAMEG00000001588 | FGFBP1       | fibroblast growth factor binding protein 1          |
| Liver | ENSAMEG00000001662 | TBX20        | T-box 20                                            |
| Liver | ENSAMEG00000001767 | --           | --                                                  |
| Liver | ENSAMEG00000001793 | ADK          | adenosine kinase                                    |
| Liver | ENSAMEG00000001835 | WASF3        | WAS protein family member 3                         |
| Liver | ENSAMEG00000001848 | PDE9A        | phosphodiesterase 9A                                |
| Liver | ENSAMEG00000001851 | --           | --                                                  |
| Liver | ENSAMEG00000001910 | GLT1D1       | glycosyltransferase 1 domain containing 1           |



|       |                    |              |                                                                     |
|-------|--------------------|--------------|---------------------------------------------------------------------|
| Liver | ENSAMEG00000001937 | --           | --                                                                  |
| Liver | ENSAMEG00000001939 | BRSK2        | BR serine/threonine kinase 2                                        |
| Liver | ENSAMEG00000001970 | PLCXD1       | phosphatidylinositol specific phospholipase C X domain containing 1 |
| Liver | ENSAMEG00000001986 | FGF19        | fibroblast growth factor 19                                         |
| Liver | ENSAMEG00000002007 | SLC24A5      | solute carrier family 24 member 5                                   |
| Liver | ENSAMEG00000002096 | ADAMTS8      | ADAM metalloproteinase with thrombospondin type 1 motif 8           |
| Liver | ENSAMEG00000002098 | HAL          | histidine ammonia-lyase                                             |
| Liver | ENSAMEG00000002115 | AMDHD1       | amidohydrolase domain containing 1                                  |
| Liver | ENSAMEG00000002167 | IGF2         | insulin like growth factor 2                                        |
| Liver | ENSAMEG00000002176 | INS-IGF2     | INS-IGF2 readthrough                                                |
| Liver | ENSAMEG00000002199 | CREB3L3      | cAMP responsive element binding protein 3 like 3                    |
| Liver | ENSAMEG00000002202 | CLDN19       | claudin 19                                                          |
| Liver | ENSAMEG00000002213 | PGLYRP2      | peptidoglycan recognition protein 2                                 |
| Liver | ENSAMEG00000002287 | LOC100482523 | haptoglobin                                                         |
| Liver | ENSAMEG00000002316 | LOC109488752 | cytochrome P450 3A12-like                                           |
| Liver | ENSAMEG00000002320 | LOC100471068 | glutathione S-transferase A1-like                                   |
| Liver | ENSAMEG00000002374 | TAT          | tyrosine aminotransferase                                           |
| Liver | ENSAMEG00000002383 | PROS1        | protein S                                                           |
| Liver | ENSAMEG00000002399 | --           | --                                                                  |
| Liver | ENSAMEG00000002423 | CCDC198      | coiled-coil domain containing 198                                   |
| Liver | ENSAMEG00000002450 | PLCB4        | phospholipase C beta 4                                              |
| Liver | ENSAMEG00000002508 | TMEM45B      | transmembrane protein 45B                                           |
| Liver | ENSAMEG00000002540 | --           | --                                                                  |
| Liver | ENSAMEG00000002548 | DHODH        | dihydroorotate dehydrogenase (quinone)                              |
| Liver | ENSAMEG00000002691 | ELOVL2       | ELOVL fatty acid elongase 2                                         |
| Liver | ENSAMEG00000002751 | RIPPLY1      | rippy transcriptional repressor 1                                   |
| Liver | ENSAMEG00000002772 | SLC51B       | solute carrier family 51 beta subunit                               |
| Liver | ENSAMEG00000002950 | ADAM23       | ADAM metalloproteinase domain 23                                    |
| Liver | ENSAMEG00000002954 | MLLT3        | MLLT3, super elongation complex subunit                             |
| Liver | ENSAMEG00000002998 | VIL1         | villin 1                                                            |
| Liver | ENSAMEG00000003019 | TMEM30B      | transmembrane protein 30B                                           |
| Liver | ENSAMEG00000003024 | DPYSL3       | dihydropyrimidinase like 3                                          |
| Liver | ENSAMEG00000003097 | LIPC         | lipase C, hepatic type                                              |
| Liver | ENSAMEG00000003107 | LOC100468534 | cytochrome P450 2C23-like                                           |
| Liver | ENSAMEG00000003132 | CYP2E1       | cytochrome P450 family 2 subfamily E member 1                       |
| Liver | ENSAMEG00000003162 | OR13G1       | olfactory receptor 13G1                                             |
| Liver | ENSAMEG00000003167 | SCART1       | scavenger receptor family member expressed on T cells 1             |
| Liver | ENSAMEG00000003191 | PFKP         | phosphofructokinase, platelet                                       |
| Liver | ENSAMEG00000003262 | PRAP1        | proline rich acidic protein 1                                       |
| Liver | ENSAMEG00000003353 | LCN9         | lipocalin 9                                                         |
| Liver | ENSAMEG00000003367 | --           | --                                                                  |

|       |                    |              |                                                        |
|-------|--------------------|--------------|--------------------------------------------------------|
| Liver | ENSAMEG00000003375 | --           | --                                                     |
| Liver | ENSAMEG00000003470 | SLC22A16     | solute carrier family 22 member 16                     |
| Liver | ENSAMEG00000003480 | C4BPA        | complement component 4 binding protein alpha           |
| Liver | ENSAMEG00000003490 | PECR         | peroxisomal trans-2-enoyl-CoA reductase                |
| Liver | ENSAMEG00000003516 | C4BPB        | complement component 4 binding protein beta            |
| Liver | ENSAMEG00000003517 | FN1          | fibronectin 1                                          |
| Liver | ENSAMEG00000003557 | IL13RA2      | interleukin 13 receptor subunit alpha 2                |
| Liver | ENSAMEG00000003564 | FNDC1        | fibronectin type III domain containing 1               |
| Liver | ENSAMEG00000003566 | TMEM86B      | transmembrane protein 86B                              |
| Liver | ENSAMEG00000003628 | C1orf116     | chromosome 1 open reading frame 116                    |
| Liver | ENSAMEG00000003674 | SERPINA7     | serpin family A member 7                               |
| Liver | ENSAMEG00000003716 | --           | --                                                     |
| Liver | ENSAMEG00000003736 | ACE          | angiotensin I converting enzyme                        |
| Liver | ENSAMEG00000003852 | CYB561       | cytochrome b561                                        |
| Liver | ENSAMEG00000003871 | PTGER3       | prostaglandin E receptor 3                             |
| Liver | ENSAMEG00000003941 | APOF         | apolipoprotein F                                       |
| Liver | ENSAMEG00000004006 | SLC15A1      | solute carrier family 15 member 1                      |
| Liver | ENSAMEG00000004014 | GLS2         | glutaminase 2                                          |
| Liver | ENSAMEG00000004046 | --           | --                                                     |
| Liver | ENSAMEG00000004055 | C8A          | complement C8 alpha chain                              |
| Liver | ENSAMEG00000004085 | CORO6        | coronin 6                                              |
| Liver | ENSAMEG00000004223 | PLXDC1       | plexin domain containing 1                             |
| Liver | ENSAMEG00000004329 | ABCC11       | ATP binding cassette subfamily C member 11             |
| Liver | ENSAMEG00000004376 | LOC105235077 | cytochrome P450 3A12-like                              |
| Liver | ENSAMEG00000004402 | LOC100464453 | contactin-associated protein-like 2                    |
| Liver | ENSAMEG00000004409 | B4GALNT3     | beta-1,4-N-acetyl-galactosaminyltransferase 3          |
| Liver | ENSAMEG00000004584 | SLC6A12      | solute carrier family 6 member 12                      |
| Liver | ENSAMEG00000004675 | SHMT1        | serine hydroxymethyltransferase 1                      |
| Liver | ENSAMEG00000004701 | SORT1        | sortilin 1                                             |
| Liver | ENSAMEG00000004767 | HGD          | homogentisate 1,2-dioxygenase                          |
| Liver | ENSAMEG00000004847 | AFM          | afamin                                                 |
| Liver | ENSAMEG00000004873 | INHBC        | inhibin beta C subunit                                 |
| Liver | ENSAMEG00000004875 | INHBE        | inhibin beta E subunit                                 |
| Liver | ENSAMEG00000004925 | ZNF548       | zinc finger protein 548                                |
| Liver | ENSAMEG00000005051 | VTN          | vitronectin                                            |
| Liver | ENSAMEG00000005080 | CPS1         | carbamoyl-phosphate synthase 1                         |
| Liver | ENSAMEG00000005085 | F11          | coagulation factor XI                                  |
| Liver | ENSAMEG00000005093 | SLC12A2      | solute carrier family 12 member 2                      |
| Liver | ENSAMEG00000005097 | KLKB1        | kallikrein B1                                          |
| Liver | ENSAMEG00000005176 | RASGEF1B     | RasGEF domain family member 1B                         |
| Liver | ENSAMEG00000005288 | --           | --                                                     |
| Liver | ENSAMEG00000005374 | DSTN         | destrin, actin depolymerizing factor                   |
| Liver | ENSAMEG00000005464 | PFKFB1       | 6-phosphofructo-2-kinase/fructose-2,6-bisphosphatase 1 |

|       |                    |              |                                                            |
|-------|--------------------|--------------|------------------------------------------------------------|
| Liver | ENSAMEG00000005568 | SYNM         | synemin                                                    |
| Liver | ENSAMEG00000005596 | MSMO1        | methylsterol monooxygenase 1                               |
| Liver | ENSAMEG00000005651 | AQP11        | aquaporin 11                                               |
| Liver | ENSAMEG00000005664 | SLCO3A1      | solute carrier organic anion transporter family member 3A1 |
| Liver | ENSAMEG00000005696 | BHMT         | betaine--homocysteine S-methyltransferase                  |
| Liver | ENSAMEG00000005723 | ESRP1        | epithelial splicing regulatory protein 1                   |
| Liver | ENSAMEG00000005730 | LOC100466123 | UDP-glucuronosyltransferase 2B31                           |
| Liver | ENSAMEG00000005769 | ABCG5        | ATP binding cassette subfamily G member 5                  |
| Liver | ENSAMEG00000005817 | SLC22A9      | solute carrier family 22 member 9                          |
| Liver | ENSAMEG00000005956 | SLC22A10     | solute carrier family 22 member 10                         |
| Liver | ENSAMEG00000005960 | TMTC1        | transmembrane and tetratricopeptide repeat containing 1    |
| Liver | ENSAMEG00000006059 | TREH         | trehalase                                                  |
| Liver | ENSAMEG00000006080 | GC           | GC, vitamin D binding protein                              |
| Liver | ENSAMEG00000006108 | --           | --                                                         |
| Liver | ENSAMEG00000006218 | LOC100480295 | multidrug resistance-associated protein 9                  |
| Liver | ENSAMEG00000006243 | LOC100471407 | cytochrome P450 2C41                                       |
| Liver | ENSAMEG00000006300 | SERPINA6     | serpin family A member 6                                   |
| Liver | ENSAMEG00000006318 | SERPINA1     | serpin family A member 1                                   |
| Liver | ENSAMEG00000006330 | --           | --                                                         |
| Liver | ENSAMEG00000006332 | ARMC3        | armadillo repeat containing 3                              |
| Liver | ENSAMEG00000006363 | SERPINA11    | serpin family A member 11                                  |
| Liver | ENSAMEG00000006400 | SDK1         | sidekick cell adhesion molecule 1                          |
| Liver | ENSAMEG00000006404 | PAH          | phenylalanine hydroxylase                                  |
| Liver | ENSAMEG00000006405 | SERPINA4     | serpin family A member 4                                   |
| Liver | ENSAMEG00000006411 | SERPINA5     | serpin family A member 5                                   |
| Liver | ENSAMEG00000006430 | SERPINA3     | serpin family A member 3                                   |
| Liver | ENSAMEG00000006448 | UROC1        | urocanate hydratase 1                                      |
| Liver | ENSAMEG00000006475 | SULT1C3      | sulfotransferase 1C1                                       |
| Liver | ENSAMEG00000006497 | EGFLAM       | EGF like, fibronectin type III and laminin G domains       |
| Liver | ENSAMEG00000006694 | PNPLA3       | patatin like phospholipase domain containing 3             |
| Liver | ENSAMEG00000006737 | UCK2         | uridine-cytidine kinase 2                                  |
| Liver | ENSAMEG00000006748 | SLC41A2      | solute carrier family 41 member 2                          |
| Liver | ENSAMEG00000006830 | LOC105234899 | anosmin-1                                                  |
| Liver | ENSAMEG00000006884 | SLC38A4      | solute carrier family 38 member 4                          |
| Liver | ENSAMEG00000006910 | F2           | coagulation factor II, thrombin                            |
| Liver | ENSAMEG00000006922 | ERLIN1       | ER lipid raft associated 1                                 |
| Liver | ENSAMEG00000006944 | --           | --                                                         |
| Liver | ENSAMEG00000006951 | CPN1         | carboxypeptidase N subunit 1                               |
| Liver | ENSAMEG00000006981 | FAM189A2     | family with sequence similarity 189 member A2              |
| Liver | ENSAMEG00000007016 | C8B          | complement C8 beta chain                                   |
| Liver | ENSAMEG00000007018 | ABCC2        | ATP binding cassette subfamily C member 2                  |
| Liver | ENSAMEG00000007061 | FKBP11       | FK506 binding protein 11                                   |

|       |                    |              |                                                                               |
|-------|--------------------|--------------|-------------------------------------------------------------------------------|
| Liver | ENSAMEG00000007080 | SLC13A5      | solute carrier family 13 member 5                                             |
| Liver | ENSAMEG00000007121 | OTC          | ornithine carbamoyltransferase                                                |
| Liver | ENSAMEG00000007161 | C3           | complement C3                                                                 |
| Liver | ENSAMEG00000007319 | MS4A15       | membrane spanning 4-domains A15                                               |
| Liver | ENSAMEG00000007338 | LOC100478101 | lysozyme C, milk isozyme                                                      |
| Liver | ENSAMEG00000007391 | SYT9         | synaptotagmin 9                                                               |
| Liver | ENSAMEG00000007398 | SLC35E4      | solute carrier family 35 member E4                                            |
| Liver | ENSAMEG00000007407 | A1BG         | alpha-1-B glycoprotein                                                        |
| Liver | ENSAMEG00000007412 | RAP1GAP2     | RAP1 GTPase activating protein 2                                              |
| Liver | ENSAMEG00000007428 | ONECUT1      | one cut homeobox 1                                                            |
| Liver | ENSAMEG00000007460 | SLC27A5      | solute carrier family 27 member 5                                             |
| Liver | ENSAMEG00000007512 | HSD3B7       | hydroxy-delta-5-steroid dehydrogenase, 3 beta- and steroid delta-isomerase 7  |
| Liver | ENSAMEG00000007532 | TMED6        | transmembrane p24 trafficking protein 6                                       |
| Liver | ENSAMEG00000007549 | CACNA1H      | calcium voltage-gated channel subunit alpha1 H                                |
| Liver | ENSAMEG00000007593 | --           | --                                                                            |
| Liver | ENSAMEG00000007612 | PRICKLE2     | prickle planar cell polarity protein 2                                        |
| Liver | ENSAMEG00000007809 | SERPINF1     | serpin family F member 1                                                      |
| Liver | ENSAMEG00000007834 | SLC1A2       | solute carrier family 1 member 2                                              |
| Liver | ENSAMEG00000007848 | WFIKKN2      | WAP, follistatin/kazal, immunoglobulin, kunitz and netrin domain containing 2 |
| Liver | ENSAMEG00000007857 | SERPINF2     | serpin family F member 2                                                      |
| Liver | ENSAMEG00000008014 | POU2F3       | POU class 2 homeobox 3                                                        |
| Liver | ENSAMEG00000008089 | PIP5K1B      | phosphatidylinositol-4-phosphate 5-kinase type 1 beta                         |
| Liver | ENSAMEG00000008108 | ITIH4        | inter-alpha-trypsin inhibitor heavy chain family member 4                     |
| Liver | ENSAMEG00000008119 | TUSC3        | tumor suppressor candidate 3                                                  |
| Liver | ENSAMEG00000008201 | ITIH3        | inter-alpha-trypsin inhibitor heavy chain 3                                   |
| Liver | ENSAMEG00000008282 | ITIH1        | inter-alpha-trypsin inhibitor heavy chain 1                                   |
| Liver | ENSAMEG00000008373 | MBOAT2       | membrane bound O-acyltransferase domain containing 2                          |
| Liver | ENSAMEG00000008599 | PKHD1        | PKHD1 ciliary IPT domain containing fibrocystin/polyductin                    |
| Liver | ENSAMEG00000008612 | SDSL         | serine dehydratase like                                                       |
| Liver | ENSAMEG00000008632 | SDS          | serine dehydratase                                                            |
| Liver | ENSAMEG00000008662 | APOA1        | Apolipoprotein A-I Proapolipoprotein A-I Truncated apolipoprotein A-I         |
| Liver | ENSAMEG00000008670 | APOC3        | apolipoprotein C3                                                             |
| Liver | ENSAMEG00000008780 | SERPIND1     | serpin family D member 1                                                      |
| Liver | ENSAMEG00000008782 | SEMA3G       | semaphorin 3G                                                                 |
| Liver | ENSAMEG00000008818 | RASAL1       | RAS protein activator like 1                                                  |
| Liver | ENSAMEG00000008842 | CYP1A2       | cytochrome P450 family 1 subfamily A member 2                                 |
| Liver | ENSAMEG00000008863 | ACSM2B       | acyl-CoA synthetase medium chain family member 2B                             |
| Liver | ENSAMEG00000009122 | RHOU         | ras homolog family member U                                                   |
| Liver | ENSAMEG00000009303 | MYH11        | myosin heavy chain 11                                                         |
| Liver | ENSAMEG00000009385 | --           | --                                                                            |

|       |                    |              |                                                         |
|-------|--------------------|--------------|---------------------------------------------------------|
| Liver | ENSAMEG00000009436 | LOC100474489 | uncharacterized LOC100474489                            |
| Liver | ENSAMEG00000009440 | LOC100472452 | cytochrome P450 2D15                                    |
| Liver | ENSAMEG00000009485 | MASP2        | mannan binding lectin serine peptidase 2                |
| Liver | ENSAMEG00000009516 | --           | --                                                      |
| Liver | ENSAMEG00000009545 | GALP         | galanin like peptide                                    |
| Liver | ENSAMEG00000009551 | --           | --                                                      |
| Liver | ENSAMEG00000009713 | AGT          | angiotensinogen                                         |
| Liver | ENSAMEG00000009798 | PROM2        | prominin 2                                              |
| Liver | ENSAMEG00000009854 | FAM151A      | family with sequence similarity 151 member A            |
| Liver | ENSAMEG00000009861 | SLC17A3      | solute carrier family 17 member 3                       |
| Liver | ENSAMEG00000009877 | CIB3         | calcium and integrin binding family member 3            |
| Liver | ENSAMEG00000009948 | SLC17A4      | solute carrier family 17 member 4                       |
| Liver | ENSAMEG00000009952 | DHCR24       | 24-dehydrocholesterol reductase                         |
| Liver | ENSAMEG00000009962 | ITIH2        | inter-alpha-trypsin inhibitor heavy chain 2             |
| Liver | ENSAMEG00000009978 | SLC30A10     | solute carrier family 30 member 10                      |
| Liver | ENSAMEG00000010170 | TRIM9        | tripartite motif containing 9                           |
| Liver | ENSAMEG00000010217 | FOXJ1        | forkhead box J1                                         |
| Liver | ENSAMEG00000010227 | ARG1         | arginase 1                                              |
| Liver | ENSAMEG00000010248 | F10          | coagulation factor X                                    |
| Liver | ENSAMEG00000010256 | PON3         | paraoxonase 3                                           |
| Liver | ENSAMEG00000010261 | ALDH5A1      | aldehyde dehydrogenase 5 family member A1               |
| Liver | ENSAMEG00000010289 | F7           | coagulation factor VII                                  |
| Liver | ENSAMEG00000010291 | SPART        | spartin                                                 |
| Liver | ENSAMEG00000010294 | GPLD1        | glycosylphosphatidylinositol specific phospholipase D1  |
| Liver | ENSAMEG00000010324 | ENPP3        | ectonucleotide pyrophosphatase/phosphodiesterase 3      |
| Liver | ENSAMEG00000010395 | TM4SF4       | transmembrane 4 L six family member 4                   |
| Liver | ENSAMEG00000010411 | BAIAP2L2     | BAI1 associated protein 2 like 2                        |
| Liver | ENSAMEG00000010415 | --           | --                                                      |
| Liver | ENSAMEG00000010479 | --           | --                                                      |
| Liver | ENSAMEG00000010547 | MOXD1        | monooxygenase DBH like 1                                |
| Liver | ENSAMEG00000010616 | VNN1         | vanin 1                                                 |
| Liver | ENSAMEG00000010632 | CDHR5        | cadherin related family member 5                        |
| Liver | ENSAMEG00000010658 | FAM20A       | FAM20A, golgi associated secretory pathway pseudokinase |
| Liver | ENSAMEG00000010706 | PCDHGB4      | protocadherin gamma subfamily B, 4                      |
| Liver | ENSAMEG00000010784 | ABCB11       | ATP binding cassette subfamily B member 11              |
| Liver | ENSAMEG00000010793 | ANGPTL8      | angiopoietin like 8                                     |
| Liver | ENSAMEG00000010817 | NROB2        | nuclear receptor subfamily 0 group B member 2           |
| Liver | ENSAMEG00000011075 | AVP          | arginine vasopressin                                    |
| Liver | ENSAMEG00000011089 | LHX2         | LIM homeobox 2                                          |
| Liver | ENSAMEG00000011125 | SLC25A47     | solute carrier family 25 member 47                      |
| Liver | ENSAMEG00000011178 | GDF15        | growth differentiation factor 15                        |
| Liver | ENSAMEG00000011252 | AZGP1        | alpha-2-glycoprotein 1, zinc-binding                    |
| Liver | ENSAMEG00000011259 | MBNL3        | muscleblind like splicing regulator 3                   |

|       |                    |              |                                                              |
|-------|--------------------|--------------|--------------------------------------------------------------|
| Liver | ENSAMEG00000011289 | CLTCL1       | clathrin heavy chain like 1                                  |
| Liver | ENSAMEG00000011329 | PELI3        | pellino E3 ubiquitin protein ligase family member 3          |
| Liver | ENSAMEG00000011547 | IL1RAP       | interleukin 1 receptor accessory protein                     |
| Liver | ENSAMEG00000011605 | ADAMTS13     | ADAM metalloproteinase with thrombospondin type 1 motif 13   |
| Liver | ENSAMEG00000011718 | LOC100464961 | UDP-glucuronosyltransferase 2B31                             |
| Liver | ENSAMEG00000011723 | SLC25A15     | solute carrier family 25 member 15                           |
| Liver | ENSAMEG00000011739 | LOC100471847 | phosphatidylinositol 3,4,5-trisphosphate 3-phosphatase TPTE2 |
| Liver | ENSAMEG00000011749 | LOC100464709 | UDP-glucuronosyltransferase 2C1                              |
| Liver | ENSAMEG00000011842 | APOH         | apolipoprotein H                                             |
| Liver | ENSAMEG00000011854 | HEBP2        | heme binding protein 2                                       |
| Liver | ENSAMEG00000011870 | SLC38A3      | solute carrier family 38 member 3                            |
| Liver | ENSAMEG00000011881 | AGMAT        | agmatinase                                                   |
| Liver | ENSAMEG00000011898 | CFH          | complement factor H                                          |
| Liver | ENSAMEG00000012004 | TLN2         | talin 2                                                      |
| Liver | ENSAMEG00000012016 | ANGPTL6      | angiopoietin like 6                                          |
| Liver | ENSAMEG00000012033 | LOC100470692 | complement C3                                                |
| Liver | ENSAMEG00000012066 | ACOX2        | acyl-CoA oxidase 2                                           |
| Liver | ENSAMEG00000012078 | LBP          | lipopolysaccharide binding protein                           |
| Liver | ENSAMEG00000012096 | UGT2A1       | UDP glucuronosyltransferase family 2 member A1 complex locus |
| Liver | ENSAMEG00000012122 | GLP2R        | glucagon like peptide 2 receptor                             |
| Liver | ENSAMEG00000012141 | SOAT2        | sterol O-acyltransferase 2                                   |
| Liver | ENSAMEG00000012216 | LOC100468789 | sulfotransferase 1 family member D1                          |
| Liver | ENSAMEG00000012233 | VLDLR        | very low density lipoprotein receptor                        |
| Liver | ENSAMEG00000012249 | SLC6A20      | solute carrier family 6 member 20                            |
| Liver | ENSAMEG00000012296 | PDE7A        | phosphodiesterase 7A                                         |
| Liver | ENSAMEG00000012313 | NADK2        | NAD kinase 2, mitochondrial                                  |
| Liver | ENSAMEG00000012319 | LMCD1        | LIM and cysteine rich domains 1                              |
| Liver | ENSAMEG00000012393 | MST1         | macrophage stimulating 1                                     |
| Liver | ENSAMEG00000012397 | LOC100477732 | UDP-glucuronosyltransferase 3A2                              |
| Liver | ENSAMEG00000012408 | DACH1        | dachshund family transcription factor 1                      |
| Liver | ENSAMEG00000012477 | RTP3         | receptor transporter protein 3                               |
| Liver | ENSAMEG00000012541 | VIPR1        | vasoactive intestinal peptide receptor 1                     |
| Liver | ENSAMEG00000012553 | --           | --                                                           |
| Liver | ENSAMEG00000012556 | LOC100474871 | alpha-1-acid glycoprotein                                    |
| Liver | ENSAMEG00000012650 | NR5A2        | nuclear receptor subfamily 5 group A member 2                |
| Liver | ENSAMEG00000012730 | APOC2        | apolipoprotein C2                                            |
| Liver | ENSAMEG00000012734 | APOC4        | apolipoprotein C4                                            |
| Liver | ENSAMEG00000012737 | APOC1        | apolipoprotein C1                                            |
| Liver | ENSAMEG00000012740 | APOE         | apolipoprotein E                                             |

|       |                    |              |                                                                      |
|-------|--------------------|--------------|----------------------------------------------------------------------|
| Liver | ENSAMEG00000012783 | MAGI2        | membrane associated guanylate kinase, WW and PDZ domain containing 2 |
| Liver | ENSAMEG00000012797 | PRDX4        | peroxiredoxin 4                                                      |
| Liver | ENSAMEG00000012834 | KIF12        | kinesin family member 12                                             |
| Liver | ENSAMEG00000012851 | AMBP         | alpha-1-microglobulin/bikunin precursor                              |
| Liver | ENSAMEG00000012883 | HAPLN3       | hyaluronan and proteoglycan link protein 3                           |
| Liver | ENSAMEG00000012894 | MFGE8        | milk fat globule-EGF factor 8 protein                                |
| Liver | ENSAMEG00000013016 | LOC100482856 | pulmonary surfactant-associated protein A                            |
| Liver | ENSAMEG00000013025 | MAT1A        | methionine adenosyltransferase 1A                                    |
| Liver | ENSAMEG00000013049 | LIMCH1       | LIM and calponin homology domains 1                                  |
| Liver | ENSAMEG00000013084 | --           | --                                                                   |
| Liver | ENSAMEG00000013086 | APOB         | apolipoprotein B                                                     |
| Liver | ENSAMEG00000013126 | KYNU         | kynureninase                                                         |
| Liver | ENSAMEG00000013144 | CPB2         | carboxypeptidase B2                                                  |
| Liver | ENSAMEG00000013281 | NNMT         | nicotinamide N-methyltransferase                                     |
| Liver | ENSAMEG00000013288 | LRAT         | lecithin retinol acyltransferase                                     |
| Liver | ENSAMEG00000013326 | C8G          | complement C8 gamma chain                                            |
| Liver | ENSAMEG00000013516 | OMD          | osteomodulin                                                         |
| Liver | ENSAMEG00000013530 | UCMA         | upper zone of growth plate and cartilage matrix associated           |
| Liver | ENSAMEG00000013550 | --           | --                                                                   |
| Liver | ENSAMEG00000013562 | ATF5         | activating transcription factor 5                                    |
| Liver | ENSAMEG00000013566 | C1R          | complement C1r                                                       |
| Liver | ENSAMEG00000013581 | DNASE2B      | deoxyribonuclease 2 beta                                             |
| Liver | ENSAMEG00000013593 | RAPGEF3      | Rap guanine nucleotide exchange factor 3                             |
| Liver | ENSAMEG00000013668 | C1S          | complement C1s                                                       |
| Liver | ENSAMEG00000013690 | SLC7A2       | solute carrier family 7 member 2                                     |
| Liver | ENSAMEG00000013784 | LOC100480698 | glutathione S-transferase theta-1                                    |
| Liver | ENSAMEG00000013822 | RBP4         | retinol binding protein 4                                            |
| Liver | ENSAMEG00000013869 | A2M          | alpha-2-macroglobulin                                                |
| Liver | ENSAMEG00000013900 | LOC100473316 | alkylglycerol monooxygenase                                          |
| Liver | ENSAMEG00000013958 | SLC6A11      | sodium- and chloride-dependent GABA transporter 3                    |
| Liver | ENSAMEG00000013968 | MFSD6        | major facilitator superfamily domain containing 6                    |
| Liver | ENSAMEG00000014005 | TRIB3        | tribbles pseudokinase 3                                              |
| Liver | ENSAMEG00000014024 | HSPA12A      | heat shock protein family A (Hsp70) member 12A                       |
| Liver | ENSAMEG00000014093 | CORO2B       | coronin 2B                                                           |
| Liver | ENSAMEG00000014110 | BMP10        | bone morphogenetic protein 10                                        |
| Liver | ENSAMEG00000014137 | HSD17B2      | hydroxysteroid 17-beta dehydrogenase 2                               |
| Liver | ENSAMEG00000014369 | PARM1        | prostate androgen-regulated mucin-like protein 1                     |
| Liver | ENSAMEG00000014373 | NQO2         | N-ribosyldihyronicotinamide:quinone reductase 2                      |
| Liver | ENSAMEG00000014441 | SEC16B       | SEC16 homolog B, endoplasmic reticulum export factor                 |
| Liver | ENSAMEG00000014444 | PRG2         | proteoglycan 2, pro eosinophil major basic protein                   |
| Liver | ENSAMEG00000014526 | SERPING1     | serpin family G member 1                                             |
| Liver | ENSAMEG00000014693 | NPY1R        | neuropeptide Y receptor Y1                                           |

|       |                    |              |                                                         |
|-------|--------------------|--------------|---------------------------------------------------------|
| Liver | ENSAMEG00000014698 | HSD17B14     | hydroxysteroid 17-beta dehydrogenase 14                 |
| Liver | ENSAMEG00000014737 | NTRK1        | neurotrophic receptor tyrosine kinase 1                 |
| Liver | ENSAMEG00000014756 | --           | --                                                      |
| Liver | ENSAMEG00000014759 | FGF21        | fibroblast growth factor 21                             |
| Liver | ENSAMEG00000014791 | --           | --                                                      |
| Liver | ENSAMEG00000014806 | ADCY1        | adenylate cyclase 1                                     |
| Liver | ENSAMEG00000014809 | ONECUT2      | one cut homeobox 2                                      |
| Liver | ENSAMEG00000014815 | HGFAC        | HGF activator                                           |
| Liver | ENSAMEG00000014822 | RASL10B      | RAS like family 10 member B                             |
| Liver | ENSAMEG00000014828 | TFR2         | transferrin receptor 2                                  |
| Liver | ENSAMEG00000014850 | ENPEP        | glutamyl aminopeptidase                                 |
| Liver | ENSAMEG00000014871 | PRRT2        | proline rich transmembrane protein 2                    |
| Liver | ENSAMEG00000014889 | ATF7IP2      | activating transcription factor 7 interacting protein 2 |
| Liver | ENSAMEG00000014891 | PCOLCE       | procollagen C-endopeptidase enhancer                    |
| Liver | ENSAMEG00000014904 | CCL16        | C-C motif chemokine ligand 16                           |
| Liver | ENSAMEG00000014967 | ANGPTL3      | angiopoietin like 3                                     |
| Liver | ENSAMEG00000015076 | --           | --                                                      |
| Liver | ENSAMEG00000015085 | ROR1         | receptor tyrosine kinase like orphan receptor 1         |
| Liver | ENSAMEG00000015162 | WEE2         | Wee1-like protein kinase 2                              |
| Liver | ENSAMEG00000015180 | GATA2        | GATA binding protein 2                                  |
| Liver | ENSAMEG00000015230 | C6           | complement C6                                           |
| Liver | ENSAMEG00000015302 | NRAP         | nebulin related anchoring protein                       |
| Liver | ENSAMEG00000015349 | HABP2        | hyaluronan binding protein 2                            |
| Liver | ENSAMEG00000015360 | FEZF2        | FEZ family zinc finger 2                                |
| Liver | ENSAMEG00000015443 | APOA2        | apolipoprotein A2                                       |
| Liver | ENSAMEG00000015468 | TDO2         | tryptophan 2,3-dioxygenase                              |
| Liver | ENSAMEG00000015595 | --           | --                                                      |
| Liver | ENSAMEG00000015644 | SERPINC1     | serpin family C member 1                                |
| Liver | ENSAMEG00000015680 | CRP          | C-reactive protein                                      |
| Liver | ENSAMEG00000015688 | APCS         | amyloid P component, serum                              |
| Liver | ENSAMEG00000015845 | LNK2         | ligand of numb-protein X 2                              |
| Liver | ENSAMEG00000015866 | ATP2B2       | ATPase plasma membrane Ca <sup>2+</sup> transporting 2  |
| Liver | ENSAMEG00000015867 | ACOT12       | acyl-CoA thioesterase 12                                |
| Liver | ENSAMEG00000015875 | SLC17A2      | solute carrier family 17 member 2                       |
| Liver | ENSAMEG00000015924 | EYA4         | EYA transcriptional coactivator and phosphatase 4       |
| Liver | ENSAMEG00000015960 | PLG          | plasminogen                                             |
| Liver | ENSAMEG00000016027 | HAO1         | hydroxyacid oxidase 1                                   |
| Liver | ENSAMEG00000016034 | --           | --                                                      |
| Liver | ENSAMEG00000016100 | TM4SF5       | transmembrane 4 L six family member 5                   |
| Liver | ENSAMEG00000016104 | LOC100470213 | cytochrome P450 2C21                                    |
| Liver | ENSAMEG00000016164 | UGT1A1       | UDP glucuronosyltransferase family 1 member A1          |
| Liver | ENSAMEG00000016189 | F9           | coagulation factor IX                                   |
| Liver | ENSAMEG00000016198 | GYS2         | glycogen synthase 2                                     |



|       |                    |          |                                                                              |
|-------|--------------------|----------|------------------------------------------------------------------------------|
| Liver | ENSAMEG00000016273 | FREM2    | FRAS1 related extracellular matrix protein 2                                 |
| Liver | ENSAMEG00000016356 | CLEC10A  | C-type lectin domain containing 10A                                          |
| Liver | ENSAMEG00000016372 | HPX      | hemopexin                                                                    |
| Liver | ENSAMEG00000016377 | ASGR2    | asialoglycoprotein receptor 2                                                |
| Liver | ENSAMEG00000016382 | ASGR1    | asialoglycoprotein receptor 1                                                |
| Liver | ENSAMEG00000016434 | --       | --                                                                           |
| Liver | ENSAMEG00000016440 | --       | --                                                                           |
| Liver | ENSAMEG00000016453 | DAO      | D-amino acid oxidase                                                         |
| Liver | ENSAMEG00000016464 | SPIC     | Spi-C transcription factor                                                   |
| Liver | ENSAMEG00000016482 | CNKS2    | connector enhancer of kinase suppressor of Ras 2                             |
| Liver | ENSAMEG00000016507 | PCK2     | phosphoenolpyruvate carboxykinase 2, mitochondrial                           |
| Liver | ENSAMEG00000016667 | --       | --                                                                           |
| Liver | ENSAMEG00000016675 | SNED1    | sushi, nidogen and EGF like domains 1                                        |
| Liver | ENSAMEG00000016798 | PROC     | protein C, inactivator of coagulation factors Va and VIIIa                   |
| Liver | ENSAMEG00000016952 | CA10     | carbonic anhydrase 10                                                        |
| Liver | ENSAMEG00000016994 | THPO     | thrombopoietin                                                               |
| Liver | ENSAMEG00000017034 | PLA2G12B | phospholipase A2 group XIIB                                                  |
| Liver | ENSAMEG00000017044 | OIT3     | oncprotein induced transcript 3                                              |
| Liver | ENSAMEG00000017094 | C9       | complement C9                                                                |
| Liver | ENSAMEG00000017136 | CDH16    | cadherin 16                                                                  |
| Liver | ENSAMEG00000017149 | CHRD2    | chordin like 2                                                               |
| Liver | ENSAMEG00000017207 | CES3     | carboxylesterase 3                                                           |
| Liver | ENSAMEG00000017292 | ADAMTS5  | ADAM metalloproteinase with thrombospondin type 1 motif 5                    |
| Liver | ENSAMEG00000017360 | NTSR1    | neurotensin receptor 1                                                       |
| Liver | ENSAMEG00000017407 | PYCR1    | pyrroline-5-carboxylate reductase 1                                          |
| Liver | ENSAMEG00000017498 | PDZK1    | PDZ domain containing 1                                                      |
| Liver | ENSAMEG00000017501 | SLC25A18 | solute carrier family 25 member 18                                           |
| Liver | ENSAMEG00000017524 | CFHR5    | complement factor H related 5                                                |
| Liver | ENSAMEG00000017529 | F13B     | coagulation factor XIII B chain                                              |
| Liver | ENSAMEG00000017590 | LCAT     | lecithin-cholesterol acyltransferase                                         |
| Liver | ENSAMEG00000017641 | HFE2     | hemochromatosis type 2 (juvenile)                                            |
| Liver | ENSAMEG00000017643 | GDF2     | growth differentiation factor 2                                              |
| Liver | ENSAMEG00000017661 | HMGCS2   | 3-hydroxy-3-methylglutaryl-CoA synthase 2                                    |
| Liver | ENSAMEG00000017673 | NPC1L1   | NPC1 like intracellular cholesterol transporter 1                            |
| Liver | ENSAMEG00000017684 | HSD3B1   | hydroxy-delta-5-steroid dehydrogenase, 3 beta- and steroid delta-isomerase 1 |
| Liver | ENSAMEG00000017763 | LEAP2    | liver enriched antimicrobial peptide 2                                       |
| Liver | ENSAMEG00000017827 | PALD1    | phosphatase domain containing, paladin 1                                     |
| Liver | ENSAMEG00000017883 | SLC22A12 | solute carrier family 22 member 12                                           |
| Liver | ENSAMEG00000017902 | LECT2    | leukocyte cell derived chemotaxin 2                                          |
| Liver | ENSAMEG00000018006 | SVEP1    | sushi, von Willebrand factor type A, EGF and pentraxin domain containing 1   |

|       |                    |              |                                                                             |
|-------|--------------------|--------------|-----------------------------------------------------------------------------|
| Liver | ENSAMEG00000018008 | AKR1D1       | aldo-keto reductase family 1 member D1                                      |
| Liver | ENSAMEG00000018041 | GSTO2        | glutathione S-transferase omega 2                                           |
| Liver | ENSAMEG00000018075 | PBLD         | phenazine biosynthesis like protein domain containing                       |
| Liver | ENSAMEG00000018103 | CCDC80       | coiled-coil domain containing 80                                            |
| Liver | ENSAMEG00000018129 | F12          | coagulation factor XII                                                      |
| Liver | ENSAMEG00000018202 | CA5A         | carbonic anhydrase 5A                                                       |
| Liver | ENSAMEG00000018206 | AMN          | amnion associated transmembrane protein                                     |
| Liver | ENSAMEG00000018209 | PAPLN        | papilin, proteoglycan like sulfated glycoprotein                            |
| Liver | ENSAMEG00000018237 | TES          | testin LIM domain protein                                                   |
| Liver | ENSAMEG00000018286 | LTBP2        | latent transforming growth factor beta binding protein 2                    |
| Liver | ENSAMEG00000018300 | NAGS         | N-acetylglutamate synthase                                                  |
| Liver | ENSAMEG00000018343 | ERG28        | ergosterol biosynthesis 28 homolog                                          |
| Liver | ENSAMEG00000018429 | PRSS48       | serine protease 48                                                          |
| Liver | ENSAMEG00000018437 | COLEC11      | collectin subfamily member 11                                               |
| Liver | ENSAMEG00000018454 | SFRP2        | secreted frizzled related protein 2                                         |
| Liver | ENSAMEG00000018459 | FGB          | fibrinogen beta chain                                                       |
| Liver | ENSAMEG00000018462 | FGA          | fibrinogen alpha chain                                                      |
| Liver | ENSAMEG00000018463 | FGG          | fibrinogen gamma chain                                                      |
| Liver | ENSAMEG00000018551 | BEX3         | brain expressed X-linked 3                                                  |
| Liver | ENSAMEG00000018554 | TCEAL9       | transcription elongation factor A like 9                                    |
| Liver | ENSAMEG00000018562 | TRAM1L1      | translocation associated membrane protein 1 like 1                          |
| Liver | ENSAMEG00000018660 | ANG          | angiogenin                                                                  |
| Liver | ENSAMEG00000018665 | RNASE4       | ribonuclease A family member 4                                              |
| Liver | ENSAMEG00000018735 | CLDN14       | claudin 14                                                                  |
| Liver | ENSAMEG00000019249 | FFAR3        | free fatty acid receptor 3                                                  |
| Liver | ENSAMEG00000019276 | CYP8B1       | cytochrome P450 family 8 subfamily B member 1                               |
| Liver | ENSAMEG00000019355 | HIST3H2A     | histone cluster 3 H2A                                                       |
| Liver | ENSAMEG00000019531 | TMEM200A     | transmembrane protein 200A                                                  |
| Liver | ENSAMEG00000019546 | GJB1         | gap junction protein beta 1                                                 |
| Liver | ENSAMEG00000019652 | --           | --                                                                          |
| Liver | ENSAMEG00000020071 | LOC100474272 | neuropeptide Y receptor type 4                                              |
| Liver | ENSAMEG00000020133 | PCDHB15      | protocadherin beta-15                                                       |
| Liver | Novel00025         | --           | hypothetical protein EGM_19048, partial                                     |
| Liver | Novel00227         | --           | --                                                                          |
| Liver | Novel00245         | --           | hypothetical protein PAL_GLEAN10015091                                      |
| Liver | Novel00657         | --           | hypothetical protein M91_03766                                              |
| Liver | Novel00679         | --           | PREDICTED: phosphatidylinositol 4-phosphate 5-kinase type-1 beta isoform X1 |
| Liver | Novel00753         | --           | PREDICTED: stimulated by retinoic acid gene 6 protein-like isoform X4       |
| Liver | Novel00766         | --           | --                                                                          |
| Liver | Novel00768         | --           | --                                                                          |
| Liver | Novel00769         | --           | --                                                                          |

|       |            |    |                                                        |
|-------|------------|----|--------------------------------------------------------|
| Liver | Novel00939 | -- | --                                                     |
| Liver | Novel00942 | -- | unnamed protein product                                |
| Liver | Novel00961 | -- | --                                                     |
| Liver | Novel01001 | -- | unknown                                                |
| Liver | Novel01117 | -- | PREDICTED: synaptotagmin-9-like                        |
| Liver | Novel01143 | -- | --                                                     |
| Liver | Novel01307 | -- | PREDICTED: ankyrin repeat domain-containing protein 45 |
| Liver | Novel01333 | -- | --                                                     |
| Liver | Novel01450 | -- | --                                                     |
| Liver | Novel01563 | -- | PREDICTED: CD99 antigen-like protein 2 isoform X3      |
| Liver | Novel01568 | -- | --                                                     |
| Liver | Novel01605 | -- | --                                                     |
| Liver | Novel01798 | -- | PREDICTED: probable C-mannosyltransferase DPY19L2      |
| Liver | Novel01816 | -- | --                                                     |
| Liver | Novel01887 | -- | --                                                     |
| Liver | Novel01923 | -- | --                                                     |
| Liver | Novel01981 | -- | --                                                     |
| Liver | Novel01987 | -- | PREDICTED: neuronal regeneration-related protein-like  |
| Liver | Novel02034 | -- | --                                                     |
| Liver | Novel02133 | -- | --                                                     |
| Liver | Novel02138 | -- | --                                                     |
| Liver | Novel02294 | -- | PREDICTED: adenosine kinase-like, partial              |
| Liver | Novel02310 | -- | --                                                     |
| Liver | Novel02311 | -- | PREDICTED: serpin A3-6                                 |
| Liver | Novel02319 | -- | PREDICTED: uncharacterized protein LOC100483682        |
| Liver | Novel02464 | -- | --                                                     |
| Liver | Novel02477 | -- | --                                                     |
| Liver | Novel02489 | -- | --                                                     |
| Liver | Novel02561 | -- | --                                                     |
| Liver | Novel02590 | -- | --                                                     |
| Liver | Novel02687 | -- | hypothetical protein M91_01570                         |
| Liver | Novel02759 | -- | --                                                     |
| Liver | Novel02777 | -- | --                                                     |
| Liver | Novel02826 | -- | hypothetical protein                                   |
| Liver | Novel02865 | -- | --                                                     |
| Liver | Novel02896 | -- | --                                                     |
| Liver | Novel02972 | -- | --                                                     |
| Liver | Novel03099 | -- | hypothetical protein PANDA_012351                      |
| Liver | Novel03108 | -- | --                                                     |
| Liver | Novel03143 | -- | PREDICTED: UDP-glucuronosyltransferase 3A2 isoform X3  |
| Liver | Novel03408 | -- | hypothetical protein                                   |
| Liver | Novel03458 | -- | --                                                     |
| Liver | Novel03492 | -- | PREDICTED: olfactory receptor 6C3-like                 |

|       |            |    |                                                              |
|-------|------------|----|--------------------------------------------------------------|
| Liver | Novel03541 | -- | PREDICTED: uncharacterized protein LOC105260882              |
| Liver | Novel03547 | -- | hypothetical protein PANDA_014163                            |
| Liver | Novel03553 | -- | endonuclease/reverse transcriptase                           |
| Liver | Novel03621 | -- | PREDICTED: uncharacterized protein LOC105498491 isoform X2   |
| Liver | Novel03667 | -- | PREDICTED: Wilms tumor protein 1-interacting protein         |
| Liver | Novel03670 | -- | --                                                           |
| Liver | Novel03672 | -- | PREDICTED: CD99 antigen-like protein 2 isoform X3            |
| Liver | Novel03726 | -- | --                                                           |
| Liver | Novel03797 | -- | --                                                           |
| Liver | Novel04234 | -- | --                                                           |
| Liver | Novel04282 | -- | --                                                           |
| Liver | Novel04298 | -- | PREDICTED: chymotrypsinogen B-like                           |
| Liver | Novel04335 | -- | PREDICTED: phospholipid-transporting ATPase IB-like          |
| Liver | Novel04388 | -- | PREDICTED: LOW QUALITY PROTEIN: zinc finger protein 665-like |
| Liver | Novel04421 | -- | --                                                           |
| Liver | Novel04434 | -- | hypothetical protein M91_01570                               |
| Liver | Novel04441 | -- | PREDICTED: uncharacterized protein LOC102160087              |
| Liver | Novel04509 | -- | --                                                           |
| Liver | Novel04515 | -- | --                                                           |
| Liver | Novel04616 | -- | --                                                           |
| Liver | Novel04659 | -- | --                                                           |
| Liver | Novel04705 | -- | unnamed protein product                                      |
| Liver | Novel04706 | -- | PREDICTED: alpha-fetoprotein-like                            |
| Liver | Novel04720 | -- | --                                                           |
| Liver | Novel04748 | -- | --                                                           |
| Liver | Novel04903 | -- | --                                                           |
| Liver | Novel04908 | -- | --                                                           |
| Liver | Novel04923 | -- | --                                                           |
| Liver | Novel05062 | -- | --                                                           |
| Liver | Novel05211 | -- | --                                                           |
| Liver | Novel05222 | -- | --                                                           |
| Liver | Novel05274 | -- | hypothetical protein EGK_20962                               |
| Liver | Novel05285 | -- | PREDICTED: plexin-A4                                         |
| Liver | Novel05311 | -- | PREDICTED: complement component C8 beta chain                |
| Liver | Novel05323 | -- | --                                                           |
| Liver | Novel05345 | -- | PREDICTED: E3 ubiquitin-protein ligase TRIM9 isoform X4      |
| Liver | Novel05366 | -- | --                                                           |
| Liver | Novel05391 | -- | --                                                           |
| Liver | Novel05419 | -- | hypothetical protein EGM_19048, partial                      |
| Liver | Novel05452 | -- | --                                                           |
| Liver | Novel05517 | -- | PREDICTED: UDP-glucuronosyltransferase 3A1-like, partial     |

|        |                    |              |                                                                  |
|--------|--------------------|--------------|------------------------------------------------------------------|
| Liver  | Novel05518         | --           | --                                                               |
| Liver  | Novel05561         | --           | --                                                               |
| Liver  | Novel05606         | --           | PREDICTED: LOW QUALITY PROTEIN: mammaglobin-A-like               |
| Liver  | Novel05704         | --           | PREDICTED: cytochrome P450 4A6-like                              |
| Liver  | Novel05780         | --           | --                                                               |
| Liver  | Novel05953         | --           | --                                                               |
| Liver  | Novel06002         | --           | PREDICTED: trehalase, partial                                    |
| Liver  | Novel06011         | --           | --                                                               |
| Spleen | ENSAMEG00000000057 | CXCR5        | C-X-C motif chemokine receptor 5                                 |
| Spleen | ENSAMEG00000000067 | --           | --                                                               |
| Spleen | ENSAMEG00000000120 | --           | --                                                               |
| Spleen | ENSAMEG00000000135 | PBK          | PDZ binding kinase                                               |
| Spleen | ENSAMEG00000000191 | HPN          | hepsin                                                           |
| Spleen | ENSAMEG00000000267 | CDCA7        | cell division cycle associated 7                                 |
| Spleen | ENSAMEG00000000269 | CD22         | CD22 molecule                                                    |
| Spleen | ENSAMEG00000000271 | LOC100482046 | cytokine SCM-1 beta                                              |
| Spleen | ENSAMEG00000000363 | RORC         | RAR related orphan receptor C                                    |
| Spleen | ENSAMEG00000000371 | CDT1         | chromatin licensing and DNA replication factor 1                 |
| Spleen | ENSAMEG00000000396 | MS4A1        | membrane spanning 4-domains A1                                   |
| Spleen | ENSAMEG00000000432 | HFM1         | HFM1, ATP dependent DNA helicase homolog                         |
| Spleen | ENSAMEG00000000438 | MS4A4A       | membrane spanning 4-domains A4A                                  |
| Spleen | ENSAMEG00000000460 | --           | --                                                               |
| Spleen | ENSAMEG00000000539 | CLNK         | cytokine dependent hematopoietic cell linker                     |
| Spleen | ENSAMEG00000000546 | TECRL        | trans-2,3-enoyl-CoA reductase like                               |
| Spleen | ENSAMEG00000000558 | CLPS         | colipase                                                         |
| Spleen | ENSAMEG00000000607 | SEMA3A       | semaphorin 3A                                                    |
| Spleen | ENSAMEG00000000651 | SEMA3D       | semaphorin 3D                                                    |
| Spleen | ENSAMEG00000000693 | NPHS1        | NPHS1, nephrin                                                   |
| Spleen | ENSAMEG00000000709 | STMND1       | stathmin domain containing 1                                     |
| Spleen | ENSAMEG00000000749 | PADI6        | peptidyl arginine deiminase 6                                    |
| Spleen | ENSAMEG00000000751 | TP53I11      | tumor protein p53 inducible protein 11                           |
| Spleen | ENSAMEG00000000832 | LAX1         | lymphocyte transmembrane adaptor 1                               |
| Spleen | ENSAMEG00000000855 | PTPRCAP      | protein tyrosine phosphatase, receptor type C associated protein |
| Spleen | ENSAMEG00000000874 | LOC100471652 | T-cell surface glycoprotein CD1a                                 |
| Spleen | ENSAMEG00000000898 | SLC37A2      | solute carrier family 37 member 2                                |
| Spleen | ENSAMEG00000000910 | ETNK2        | ethanolamine kinase 2                                            |
| Spleen | ENSAMEG00000001125 | CPNE7        | copine 7                                                         |
| Spleen | ENSAMEG00000001169 | --           | --                                                               |
| Spleen | ENSAMEG00000001172 | --           | --                                                               |
| Spleen | ENSAMEG00000001438 | --           | --                                                               |
| Spleen | ENSAMEG00000001440 | LOC100465875 | zinc finger protein 671                                          |
| Spleen | ENSAMEG00000001443 | --           | --                                                               |

|        |                    |              |                                                                      |
|--------|--------------------|--------------|----------------------------------------------------------------------|
| Spleen | ENSAMEG00000001479 | CDH11        | cadherin 11                                                          |
| Spleen | ENSAMEG00000001490 | PTCHD4       | patched domain containing 4                                          |
| Spleen | ENSAMEG00000001508 | ADAM28       | ADAM metallopeptidase domain 28                                      |
| Spleen | ENSAMEG00000001530 | KCNQ2        | potassium voltage-gated channel subfamily Q member 2                 |
| Spleen | ENSAMEG00000001613 | MEP1A        | mepirin A subunit alpha                                              |
| Spleen | ENSAMEG00000001681 | ENTPD3       | ectonucleoside triphosphate diphosphohydrolase 3                     |
| Spleen | ENSAMEG00000001875 | SLC4A8       | solute carrier family 4 member 8                                     |
| Spleen | ENSAMEG00000001908 | HLA-DOA      | major histocompatibility complex, class II, DO alpha                 |
| Spleen | ENSAMEG00000001948 | DKK2         | dickkopf WNT signaling pathway inhibitor 2                           |
| Spleen | ENSAMEG00000001963 | OPCML        | opioid binding protein/cell adhesion molecule like                   |
| Spleen | ENSAMEG00000002090 | PIK3R6       | phosphoinositide-3-kinase regulatory subunit 6                       |
| Spleen | ENSAMEG00000002238 | DRC1         | dynein regulatory complex subunit 1                                  |
| Spleen | ENSAMEG00000002259 | IL17REL      | interleukin 17 receptor E like                                       |
| Spleen | ENSAMEG00000002276 | RXFP1        | relaxin/insulin like family peptide receptor 1                       |
| Spleen | ENSAMEG00000002422 | LOC105234503 | dynein heavy chain 5, axonemal                                       |
| Spleen | ENSAMEG00000002478 | SSPO         | SCO-spondin                                                          |
| Spleen | ENSAMEG00000002513 | CXCL13       | C-X-C motif chemokine ligand 13                                      |
| Spleen | ENSAMEG00000002553 | CAPSL        | calcyphosine like                                                    |
| Spleen | ENSAMEG00000002608 | PLCH1        | phospholipase C eta 1                                                |
| Spleen | ENSAMEG00000002626 | --           | --                                                                   |
| Spleen | ENSAMEG00000002668 | MADCAM1      | mucosal vascular addressin cell adhesion molecule 1                  |
| Spleen | ENSAMEG00000002723 | ANKDD1A      | ankyrin repeat and death domain containing 1A                        |
| Spleen | ENSAMEG00000002725 | --           | --                                                                   |
| Spleen | ENSAMEG00000002754 | MILR1        | mast cell immunoglobulin like receptor 1                             |
| Spleen | ENSAMEG00000002762 | --           | --                                                                   |
| Spleen | ENSAMEG00000002804 | SDC1         | syndecan 1                                                           |
| Spleen | ENSAMEG00000002860 | ITGA8        | integrin subunit alpha 8                                             |
| Spleen | ENSAMEG00000002874 | VSIG1        | V-set and immunoglobulin domain containing 1                         |
| Spleen | ENSAMEG00000002885 | CD40LG       | CD40 ligand                                                          |
| Spleen | ENSAMEG00000002909 | SCN4A        | sodium voltage-gated channel alpha subunit 4                         |
| Spleen | ENSAMEG00000002977 | MAPK4        | mitogen-activated protein kinase 4                                   |
| Spleen | ENSAMEG00000003033 | CD79B        | CD79b molecule                                                       |
| Spleen | ENSAMEG00000003038 | GH1          | Ailuropoda melanoleuca somatotropin (GH1), mRNA.                     |
| Spleen | ENSAMEG00000003057 | --           | --                                                                   |
| Spleen | ENSAMEG00000003064 | GPR39        | G protein-coupled receptor 39                                        |
| Spleen | ENSAMEG00000003084 | PPM1K        | protein phosphatase, Mg <sup>2+</sup> /Mn <sup>2+</sup> dependent 1K |
| Spleen | ENSAMEG00000003144 | IL12A        | interleukin 12A                                                      |
| Spleen | ENSAMEG00000003153 | STK32A       | serine/threonine kinase 32A                                          |
| Spleen | ENSAMEG00000003167 | SCART1       | scavenger receptor family member expressed on T cells 1              |
| Spleen | ENSAMEG00000003170 | TXK          | TXK tyrosine kinase                                                  |
| Spleen | ENSAMEG00000003205 | PLA2G2D      | phospholipase A2 group IID                                           |
| Spleen | ENSAMEG00000003290 | LIMD2        | LIM domain containing 2                                              |
| Spleen | ENSAMEG00000003427 | ERICH3       | glutamate rich 3                                                     |

|        |                    |          |                                                            |
|--------|--------------------|----------|------------------------------------------------------------|
| Spleen | ENSAMEG00000003432 | --       | --                                                         |
| Spleen | ENSAMEG00000003438 | CR2      | complement C3d receptor 2                                  |
| Spleen | ENSAMEG00000003452 | DDO      | D-aspartate oxidase                                        |
| Spleen | ENSAMEG00000003473 | TAFA3    | TAFA chemokine like family member 3                        |
| Spleen | ENSAMEG00000003557 | IL13RA2  | interleukin 13 receptor subunit alpha 2                    |
| Spleen | ENSAMEG00000003576 | SLC35F1  | solute carrier family 35 member F1                         |
| Spleen | ENSAMEG00000003624 | FAM184A  | family with sequence similarity 184 member A               |
| Spleen | ENSAMEG00000003676 | --       | --                                                         |
| Spleen | ENSAMEG00000003697 | TNFRSF9  | TNF receptor superfamily member 9                          |
| Spleen | ENSAMEG00000003730 | CTNND2   | catenin delta 2                                            |
| Spleen | ENSAMEG00000003770 | NRROS    | negative regulator of reactive oxygen species              |
| Spleen | ENSAMEG00000003831 | MYBL2    | MYB proto-oncogene like 2                                  |
| Spleen | ENSAMEG00000003850 | SBK2     | SH3 domain binding kinase family member 2                  |
| Spleen | ENSAMEG00000003951 | TLX3     | T cell leukemia homeobox 3                                 |
| Spleen | ENSAMEG00000004167 | C11orf52 | chromosome 11 open reading frame 52                        |
| Spleen | ENSAMEG00000004195 | ARL5C    | ADP ribosylation factor like GTPase 5C                     |
| Spleen | ENSAMEG00000004338 | POU2AF1  | POU class 2 associating factor 1                           |
| Spleen | ENSAMEG00000004450 | --       | --                                                         |
| Spleen | ENSAMEG00000004457 | CD5L     | CD5 molecule like                                          |
| Spleen | ENSAMEG00000004479 | CD79A    | CD79a molecule                                             |
| Spleen | ENSAMEG00000004534 | TMEM255B | transmembrane protein 255B                                 |
| Spleen | ENSAMEG00000004633 | DCLK1    | doublecortin like kinase 1                                 |
| Spleen | ENSAMEG00000004634 | KLRD1    | killer cell lectin like receptor D1                        |
| Spleen | ENSAMEG00000004661 | TBX21    | T-box 21                                                   |
| Spleen | ENSAMEG00000004693 | CLDN11   | claudin 11                                                 |
| Spleen | ENSAMEG00000004721 | EDIL3    | EGF like repeats and discoidin domains 3                   |
| Spleen | ENSAMEG00000004752 | GTRP1    | growth hormone regulated TBC protein 1                     |
| Spleen | ENSAMEG00000004848 | --       | --                                                         |
| Spleen | ENSAMEG00000004883 | IGHM     | immunoglobulin heavy constant mu                           |
| Spleen | ENSAMEG00000004905 | --       | --                                                         |
| Spleen | ENSAMEG00000005020 | PLAC8    | placenta specific 8                                        |
| Spleen | ENSAMEG00000005154 | NOS2     | nitric oxide synthase 2                                    |
| Spleen | ENSAMEG00000005181 | ZAP70    | zeta chain of T cell receptor associated protein kinase 70 |
| Spleen | ENSAMEG00000005207 | NOX4     | NADPH oxidase 4                                            |
| Spleen | ENSAMEG00000005233 | PDLIM3   | PDZ and LIM domain 3                                       |
| Spleen | ENSAMEG00000005259 | FOLH1    | folate hydrolase 1                                         |
| Spleen | ENSAMEG00000005310 | ARHGEF37 | Rho guanine nucleotide exchange factor 37                  |
| Spleen | ENSAMEG00000005530 | BICDL2   | BICD family like cargo adaptor 2                           |
| Spleen | ENSAMEG00000005829 | --       | --                                                         |
| Spleen | ENSAMEG00000005851 | ROS1     | ROS proto-oncogene 1, receptor tyrosine kinase             |
| Spleen | ENSAMEG00000005863 | JCHAIN   | joining chain of multimeric IgA and IgM                    |
| Spleen | ENSAMEG00000005942 | MSC      | musculin                                                   |
| Spleen | ENSAMEG00000005998 | ITK      | IL2 inducible T cell kinase                                |

|        |                    |              |                                                        |
|--------|--------------------|--------------|--------------------------------------------------------|
| Spleen | ENSAMEG00000006136 | BLK          | BLK proto-oncogene, Src family tyrosine kinase         |
| Spleen | ENSAMEG00000006223 | EPCAM        | epithelial cell adhesion molecule                      |
| Spleen | ENSAMEG00000006268 | NIPAL4       | NIPA like domain containing 4                          |
| Spleen | ENSAMEG00000006286 | EPHA5        | EPH receptor A5                                        |
| Spleen | ENSAMEG00000006292 | --           | --                                                     |
| Spleen | ENSAMEG00000006302 | --           | --                                                     |
| Spleen | ENSAMEG00000006311 | TRBV16       | T cell receptor beta variable 16 (gene/pseudogene)     |
| Spleen | ENSAMEG00000006312 | TRBV19       | T cell receptor beta variable 19                       |
| Spleen | ENSAMEG00000006313 | --           | --                                                     |
| Spleen | ENSAMEG00000006400 | SDK1         | sidekick cell adhesion molecule 1                      |
| Spleen | ENSAMEG00000006445 | KCNIP4       | potassium voltage-gated channel interacting protein 4  |
| Spleen | ENSAMEG00000006673 | NAV3         | neuron navigator 3                                     |
| Spleen | ENSAMEG00000006749 | GABRA1       | gamma-aminobutyric acid type A receptor alpha1 subunit |
| Spleen | ENSAMEG00000006799 | NYX          | nyctalopin                                             |
| Spleen | ENSAMEG00000006830 | LOC105234899 | anosmin-1                                              |
| Spleen | ENSAMEG00000006927 | CPLX2        | complexin 2                                            |
| Spleen | ENSAMEG00000006972 | WWC1         | WW and C2 domain containing 1                          |
| Spleen | ENSAMEG00000006985 | PCED1B       | PC-esterase domain containing 1B                       |
| Spleen | ENSAMEG00000007018 | ABCC2        | ATP binding cassette subfamily C member 2              |
| Spleen | ENSAMEG00000007039 | --           | --                                                     |
| Spleen | ENSAMEG00000007082 | AICDA        | activation induced cytidine deaminase                  |
| Spleen | ENSAMEG00000007133 | TRDC         | T cell receptor delta constant                         |
| Spleen | ENSAMEG00000007135 | --           | --                                                     |
| Spleen | ENSAMEG00000007231 | AK5          | adenylate kinase 5                                     |
| Spleen | ENSAMEG00000007274 | BRINP1       | BMP/retinoic acid inducible neural specific 1          |
| Spleen | ENSAMEG00000007277 | NKX2-3       | NK2 homeobox 3                                         |
| Spleen | ENSAMEG00000007409 | GLB1L2       | galactosidase beta 1 like 2                            |
| Spleen | ENSAMEG00000007493 | CD6          | CD6 molecule                                           |
| Spleen | ENSAMEG00000007547 | CD5          | CD5 molecule                                           |
| Spleen | ENSAMEG00000007637 | CACNA1E      | calcium voltage-gated channel subunit alpha1 E         |
| Spleen | ENSAMEG00000007639 | PLD4         | phospholipase D family member 4                        |
| Spleen | ENSAMEG00000007672 | LCK          | LCK proto-oncogene, Src family tyrosine kinase         |
| Spleen | ENSAMEG00000007735 | IGHV6-1      | immunoglobulin heavy variable 6-1                      |
| Spleen | ENSAMEG00000007862 | COBL         | cordon-bleu WH2 repeat protein                         |
| Spleen | ENSAMEG00000007865 | SEPTIN1      | septin 1                                               |
| Spleen | ENSAMEG00000007896 | KCNQ5        | potassium voltage-gated channel subfamily Q member 5   |
| Spleen | ENSAMEG00000007935 | DSC2         | desmocollin 2                                          |
| Spleen | ENSAMEG00000008065 | SCML4        | Scm polycomb group protein like 4                      |
| Spleen | ENSAMEG00000008079 | --           | --                                                     |
| Spleen | ENSAMEG00000008093 | SLC36A2      | solute carrier family 36 member 2                      |
| Spleen | ENSAMEG00000008164 | DSG2         | desmoglein 2                                           |
| Spleen | ENSAMEG00000008188 | --           | --                                                     |
| Spleen | ENSAMEG00000008189 | --           | --                                                     |



|        |                    |              |                                                                            |
|--------|--------------------|--------------|----------------------------------------------------------------------------|
| Spleen | ENSAMEG00000008190 | --           | --                                                                         |
| Spleen | ENSAMEG00000008217 | --           | --                                                                         |
| Spleen | ENSAMEG00000008247 | --           | --                                                                         |
| Spleen | ENSAMEG00000008265 | LOC105238776 | uncharacterized LOC105238776                                               |
| Spleen | ENSAMEG00000008395 | CRTAM        | cytotoxic and regulatory T cell molecule                                   |
| Spleen | ENSAMEG00000008423 | --           | --                                                                         |
| Spleen | ENSAMEG00000008427 | --           | --                                                                         |
| Spleen | ENSAMEG00000008447 | CLMP         | CXADR like membrane protein                                                |
| Spleen | ENSAMEG00000008550 | --           | --                                                                         |
| Spleen | ENSAMEG00000008683 | --           | --                                                                         |
| Spleen | ENSAMEG00000008750 | --           | --                                                                         |
| Spleen | ENSAMEG00000008793 | CPLX3        | complexin 3                                                                |
| Spleen | ENSAMEG00000008796 | LMAN1L       | lectin, mannose binding 1 like                                             |
| Spleen | ENSAMEG00000008811 | ISM1         | isthmin 1                                                                  |
| Spleen | ENSAMEG00000008823 | CNTNAP5      | contactin associated protein like 5                                        |
| Spleen | ENSAMEG00000008842 | CYP1A2       | cytochrome P450 family 1 subfamily A member 2                              |
| Spleen | ENSAMEG00000008865 | TNFSF11      | TNF superfamily member 11                                                  |
| Spleen | ENSAMEG00000008876 | BAIAP2L1     | BAI1 associated protein 2 like 1                                           |
| Spleen | ENSAMEG00000008898 | CYP1A1       | cytochrome P450 family 1 subfamily A member 1                              |
| Spleen | ENSAMEG00000008911 | --           | --                                                                         |
| Spleen | ENSAMEG00000008913 | --           | --                                                                         |
| Spleen | ENSAMEG00000009037 | NOX1         | NADPH oxidase 1                                                            |
| Spleen | ENSAMEG00000009069 | CYP11A1      | cytochrome P450 family 11 subfamily A member 1                             |
| Spleen | ENSAMEG00000009121 | XKRX         | XK related, X-linked                                                       |
| Spleen | ENSAMEG00000009237 | TP73         | tumor protein p73                                                          |
| Spleen | ENSAMEG00000009264 | C15orf59     | chromosome 15 open reading frame 59                                        |
| Spleen | ENSAMEG00000009342 | NKX3-2       | NK3 homeobox 2                                                             |
| Spleen | ENSAMEG00000009362 | TNFRSF13C    | TNF receptor superfamily member 13C                                        |
| Spleen | ENSAMEG00000009399 | P2RX1        | purinergic receptor P2X 1                                                  |
| Spleen | ENSAMEG00000009412 | ATP2A3       | ATPase sarcoplasmic/endoplasmic reticulum Ca <sup>2+</sup> -transporting 3 |
| Spleen | ENSAMEG00000009419 | ECHDC2       | enoyl-CoA hydratase domain containing 2                                    |
| Spleen | ENSAMEG00000009437 | STYK1        | serine/threonine/tyrosine kinase 1                                         |
| Spleen | ENSAMEG00000009440 | LOC100472452 | cytochrome P450 2D15                                                       |
| Spleen | ENSAMEG00000009473 | CD72         | CD72 molecule                                                              |
| Spleen | ENSAMEG00000009479 | --           | --                                                                         |
| Spleen | ENSAMEG00000009488 | LTA          | lymphotoxin alpha                                                          |
| Spleen | ENSAMEG00000009525 | --           | --                                                                         |
| Spleen | ENSAMEG00000009547 | POLE2        | DNA polymerase epsilon 2, accessory subunit                                |
| Spleen | ENSAMEG00000009613 | TNFRSF17     | TNF receptor superfamily member 17                                         |
| Spleen | ENSAMEG00000009652 | PGBD5        | piggyBac transposable element derived 5                                    |
| Spleen | ENSAMEG00000009730 | ALDH8A1      | aldehyde dehydrogenase 8 family member A1                                  |
| Spleen | ENSAMEG00000009859 | LGALS4       | galectin 4                                                                 |

|        |                    |            |                                                         |
|--------|--------------------|------------|---------------------------------------------------------|
| Spleen | ENSAMEG00000009888 | IKZF3      | IKAROS family zinc finger 3                             |
| Spleen | ENSAMEG00000010008 | CD8A       | CD8a molecule                                           |
| Spleen | ENSAMEG00000010032 | TMEM156    | transmembrane protein 156                               |
| Spleen | ENSAMEG00000010071 | NCMAP      | non-compact myelin associated protein                   |
| Spleen | ENSAMEG00000010102 | RUNX3      | runt related transcription factor 3                     |
| Spleen | ENSAMEG00000010113 | SLA2       | Src like adaptor 2                                      |
| Spleen | ENSAMEG00000010127 | PAX5       | paired box 5                                            |
| Spleen | ENSAMEG00000010156 | PERP       | PERP, TP53 apoptosis effector                           |
| Spleen | ENSAMEG00000010166 | --         | --                                                      |
| Spleen | ENSAMEG00000010173 | --         | --                                                      |
| Spleen | ENSAMEG00000010182 | MAP4K1     | mitogen-activated protein kinase kinase kinase kinase 1 |
| Spleen | ENSAMEG00000010185 | --         | --                                                      |
| Spleen | ENSAMEG00000010189 | --         | --                                                      |
| Spleen | ENSAMEG00000010191 | TRAT1      | T cell receptor associated transmembrane adaptor 1      |
| Spleen | ENSAMEG00000010196 | F2RL3      | F2R like thrombin or trypsin receptor 3                 |
| Spleen | ENSAMEG00000010234 | SOX21      | SRY-box 21                                              |
| Spleen | ENSAMEG00000010299 | PLPP4      | phospholipid phosphatase 4                              |
| Spleen | ENSAMEG00000010347 | CNTN1      | contactin 1                                             |
| Spleen | ENSAMEG00000010373 | PKP3       | plakophilin 3                                           |
| Spleen | ENSAMEG00000010399 | GRPR       | gastrin releasing peptide receptor                      |
| Spleen | ENSAMEG00000010411 | BAIAP2L2   | BAI1 associated protein 2 like 2                        |
| Spleen | ENSAMEG00000010441 | --         | --                                                      |
| Spleen | ENSAMEG00000010598 | TSPEAR     | thrombospondin type laminin G domain and EAR repeats    |
| Spleen | ENSAMEG00000010631 | FAM129C    | family with sequence similarity 129 member C            |
| Spleen | ENSAMEG00000010650 | --         | --                                                      |
| Spleen | ENSAMEG00000010658 | FAM20A     | FAM20A, golgi associated secretory pathway pseudokinase |
| Spleen | ENSAMEG00000010676 | NLRC3      | NLR family CARD domain containing 3                     |
| Spleen | ENSAMEG00000010699 | EPS8L2     | EPS8 like 2                                             |
| Spleen | ENSAMEG00000010758 | FCHO1      | FCH domain only 1                                       |
| Spleen | ENSAMEG00000010800 | --         | --                                                      |
| Spleen | ENSAMEG00000010836 | SIGLEC1    | sialic acid binding Ig like lectin 1                    |
| Spleen | ENSAMEG00000011003 | GRAP2      | GRB2-related adaptor protein 2                          |
| Spleen | ENSAMEG00000011008 | IL12RB1    | interleukin 12 receptor subunit beta 1                  |
| Spleen | ENSAMEG00000011163 | IL21R      | interleukin 21 receptor                                 |
| Spleen | ENSAMEG00000011166 | NR5A1      | nuclear receptor subfamily 5 group A member 1           |
| Spleen | ENSAMEG00000011277 | CUNH4orf19 | chromosome unknown C4orf19 homolog                      |
| Spleen | ENSAMEG00000011326 | STC2       | stanniocalcin 2                                         |
| Spleen | ENSAMEG00000011394 | --         | --                                                      |
| Spleen | ENSAMEG00000011397 | --         | --                                                      |
| Spleen | ENSAMEG00000011400 | --         | --                                                      |
| Spleen | ENSAMEG00000011427 | LMO7       | LIM domain 7                                            |
| Spleen | ENSAMEG00000011477 | --         | --                                                      |
| Spleen | ENSAMEG00000011507 | --         | --                                                      |

|        |                    |              |                                                            |
|--------|--------------------|--------------|------------------------------------------------------------|
| Spleen | ENSAMEG00000011508 | CCK          | cholecystokinin                                            |
| Spleen | ENSAMEG00000011515 | DOCK10       | dedicator of cytokinesis 10                                |
| Spleen | ENSAMEG00000011517 | CERS1        | ceramide synthase 1                                        |
| Spleen | ENSAMEG00000011584 | WNT5A        | Wnt family member 5A                                       |
| Spleen | ENSAMEG00000011595 | HOMER3       | homer scaffolding protein 3                                |
| Spleen | ENSAMEG00000011640 | TMEM91       | transmembrane protein 91                                   |
| Spleen | ENSAMEG00000011678 | RNF43        | ring finger protein 43                                     |
| Spleen | ENSAMEG00000011779 | HSPB7        | heat shock protein family B (small) member 7               |
| Spleen | ENSAMEG00000011835 | LOC100470434 | proline dehydrogenase 1, mitochondrial                     |
| Spleen | ENSAMEG00000011844 | SLC25A34     | solute carrier family 25 member 34                         |
| Spleen | ENSAMEG00000011859 | ARFGEF3      | ARFGEF family member 3                                     |
| Spleen | ENSAMEG00000011870 | SLC38A3      | solute carrier family 38 member 3                          |
| Spleen | ENSAMEG00000011916 | CDH2         | cadherin 2                                                 |
| Spleen | ENSAMEG00000011924 | LOC100470574 | receptor-type tyrosine-protein phosphatase V-like          |
| Spleen | ENSAMEG00000011943 | KRT8         | keratin 8                                                  |
| Spleen | ENSAMEG00000011948 | LOC105241797 | killer cell lectin-like receptor 5                         |
| Spleen | ENSAMEG00000011977 | FCRL5        | Fc receptor like 5                                         |
| Spleen | ENSAMEG00000011981 | KRT18        | keratin 18                                                 |
| Spleen | ENSAMEG00000011985 | --           | --                                                         |
| Spleen | ENSAMEG00000011988 | KLRK1        | killer cell lectin like receptor K1                        |
| Spleen | ENSAMEG00000012007 | --           | --                                                         |
| Spleen | ENSAMEG00000012009 | FCRL3        | Fc receptor like 3                                         |
| Spleen | ENSAMEG00000012066 | ACOX2        | acyl-CoA oxidase 2                                         |
| Spleen | ENSAMEG00000012147 | LAD1         | ladinin 1                                                  |
| Spleen | ENSAMEG00000012265 | TNFRSF13B    | TNF receptor superfamily member 13B                        |
| Spleen | ENSAMEG00000012342 | SSUH2        | ssu-2 homolog (C. elegans)                                 |
| Spleen | ENSAMEG00000012376 | CMTM8        | CKLF like MARVEL transmembrane domain containing 8         |
| Spleen | ENSAMEG00000012439 | FMOD         | fibromodulin                                               |
| Spleen | ENSAMEG00000012458 | EDN3         | endothelin 3                                               |
| Spleen | ENSAMEG00000012579 | PSTPIP2      | proline-serine-threonine phosphatase interacting protein 2 |
| Spleen | ENSAMEG00000012617 | --           | --                                                         |
| Spleen | ENSAMEG00000012699 | AVPR1B       | arginine vasopressin receptor 1B                           |
| Spleen | ENSAMEG00000012729 | --           | --                                                         |
| Spleen | ENSAMEG00000012731 | EOMES        | eomesodermin                                               |
| Spleen | ENSAMEG00000012746 | CAMK4        | calcium/calmodulin dependent protein kinase IV             |
| Spleen | ENSAMEG00000012764 | NEGR1        | neuronal growth regulator 1                                |
| Spleen | ENSAMEG00000012786 | PTCRA        | pre T cell antigen receptor alpha                          |
| Spleen | ENSAMEG00000012856 | SLA          | Src like adaptor                                           |
| Spleen | ENSAMEG00000012919 | KIF21A       | kinesin family member 21A                                  |
| Spleen | ENSAMEG00000013028 | RGN          | regucalcin                                                 |
| Spleen | ENSAMEG00000013107 | SPIB         | Spi-B transcription factor                                 |
| Spleen | ENSAMEG00000013141 | CD3G         | CD3g molecule                                              |
| Spleen | ENSAMEG00000013155 | CD3D         | CD3d molecule                                              |

|        |                    |              |                                                         |
|--------|--------------------|--------------|---------------------------------------------------------|
| Spleen | ENSAMEG00000013166 | CD3E         | CD3e molecule                                           |
| Spleen | ENSAMEG00000013306 | MYH14        | myosin heavy chain 14                                   |
| Spleen | ENSAMEG00000013475 | CCDC3        | coiled-coil domain containing 3                         |
| Spleen | ENSAMEG00000013498 | CLSTN3       | calsyntenin 3                                           |
| Spleen | ENSAMEG00000013523 | GABRD        | gamma-aminobutyric acid type A receptor delta subunit   |
| Spleen | ENSAMEG00000013547 | --           | --                                                      |
| Spleen | ENSAMEG00000013613 | TNFRSF4      | TNF receptor superfamily member 4                       |
| Spleen | ENSAMEG00000013628 | --           | --                                                      |
| Spleen | ENSAMEG00000013800 | TMC8         | transmembrane channel like 8                            |
| Spleen | ENSAMEG00000013858 | --           | --                                                      |
| Spleen | ENSAMEG00000013909 | LOC105241990 | contactin-associated protein-like 5                     |
| Spleen | ENSAMEG00000014075 | CYP4B1       | cytochrome P450 family 4 subfamily B member 1           |
| Spleen | ENSAMEG00000014082 | LAMB4        | laminin subunit beta 4                                  |
| Spleen | ENSAMEG00000014087 | --           | --                                                      |
| Spleen | ENSAMEG00000014088 | SLAMF7       | SLAM family member 7                                    |
| Spleen | ENSAMEG00000014107 | GKN2         | gastrokine 2                                            |
| Spleen | ENSAMEG00000014126 | RSPO4        | R-spondin 4                                             |
| Spleen | ENSAMEG00000014283 | --           | --                                                      |
| Spleen | ENSAMEG00000014285 | --           | --                                                      |
| Spleen | ENSAMEG00000014350 | AREG         | amphiregulin                                            |
| Spleen | ENSAMEG00000014444 | PRG2         | proteoglycan 2, pro eosinophil major basic protein      |
| Spleen | ENSAMEG00000014466 | CD27         | CD27 molecule                                           |
| Spleen | ENSAMEG00000014507 | SH3GL3       | SH3 domain containing GRB2 like 3, endophilin A3        |
| Spleen | ENSAMEG00000014522 | GUCY1A2      | guanylate cyclase 1 soluble subunit alpha 2             |
| Spleen | ENSAMEG00000014612 | MAPT         | microtubule associated protein tau                      |
| Spleen | ENSAMEG00000014643 | PI15         | peptidase inhibitor 15                                  |
| Spleen | ENSAMEG00000014693 | NPY1R        | neuropeptide Y receptor Y1                              |
| Spleen | ENSAMEG00000014699 | NPY5R        | neuropeptide Y receptor Y5                              |
| Spleen | ENSAMEG00000014704 | ITGB3        | integrin subunit beta 3                                 |
| Spleen | ENSAMEG00000014728 | MMD          | monocyte to macrophage differentiation associated       |
| Spleen | ENSAMEG00000014806 | ADCY1        | adenylate cyclase 1                                     |
| Spleen | ENSAMEG00000014889 | ATF7IP2      | activating transcription factor 7 interacting protein 2 |
| Spleen | ENSAMEG00000015007 | SH2D2A       | SH2 domain containing 2A                                |
| Spleen | ENSAMEG00000015066 | GDNF         | glial cell derived neurotrophic factor                  |
| Spleen | ENSAMEG00000015075 | --           | --                                                      |
| Spleen | ENSAMEG00000015225 | ELL3         | elongation factor for RNA polymerase II 3               |
| Spleen | ENSAMEG00000015232 | NR1H4        | nuclear receptor subfamily 1 group H member 4           |
| Spleen | ENSAMEG00000015552 | ZP3          | zona pellucida glycoprotein 3                           |
| Spleen | ENSAMEG00000015558 | SCN1A        | sodium voltage-gated channel alpha subunit 1            |
| Spleen | ENSAMEG00000015664 | RORB         | RAR related orphan receptor B                           |
| Spleen | ENSAMEG00000015679 | CD19         | CD19 molecule                                           |
| Spleen | ENSAMEG00000015681 | LY9          | lymphocyte antigen 9                                    |
| Spleen | ENSAMEG00000015682 | --           | --                                                      |

|        |                    |              |                                                    |
|--------|--------------------|--------------|----------------------------------------------------|
| Spleen | ENSAMEG00000015726 | SH2D1A       | SH2 domain containing 1A                           |
| Spleen | ENSAMEG00000015734 | RYR3         | ryanodine receptor 3                               |
| Spleen | ENSAMEG00000015813 | BCL11A       | B cell CLL/lymphoma 11A                            |
| Spleen | ENSAMEG00000015837 | STXBP6       | syntaxin binding protein 6                         |
| Spleen | ENSAMEG00000015997 | LAMP3        | lysosomal associated membrane protein 3            |
| Spleen | ENSAMEG00000016011 | PRRX2        | paired related homeobox 2                          |
| Spleen | ENSAMEG00000016044 | LOC100468389 | immunoglobulin omega chain                         |
| Spleen | ENSAMEG00000016128 | WSCD2        | WSC domain containing 2                            |
| Spleen | ENSAMEG00000016211 | CNTNAP4      | contactin associated protein like 4                |
| Spleen | ENSAMEG00000016331 | MAOB         | monoamine oxidase B                                |
| Spleen | ENSAMEG00000016382 | ASGR1        | asialoglycoprotein receptor 1                      |
| Spleen | ENSAMEG00000016415 | IRX6         | iroquois homeobox 6                                |
| Spleen | ENSAMEG00000016420 | SPTBN5       | spectrin beta, non-erythrocytic 5                  |
| Spleen | ENSAMEG00000016464 | SPIC         | Spi-C transcription factor                         |
| Spleen | ENSAMEG00000016521 | OLFML2A      | olfactomedin like 2A                               |
| Spleen | ENSAMEG00000016556 | ITGBL1       | integrin subunit beta like 1                       |
| Spleen | ENSAMEG00000017019 | DLL1         | delta like canonical Notch ligand 1                |
| Spleen | ENSAMEG00000017060 | ADGRG5       | adhesion G protein-coupled receptor G5             |
| Spleen | ENSAMEG00000017094 | C9           | complement C9                                      |
| Spleen | ENSAMEG00000017114 | TMEM151A     | transmembrane protein 151A                         |
| Spleen | ENSAMEG00000017246 | DDAH1        | dimethylarginine dimethylaminohydrolase 1          |
| Spleen | ENSAMEG00000017354 | DSP          | desmoplakin                                        |
| Spleen | ENSAMEG00000017416 | LY86         | lymphocyte antigen 86                              |
| Spleen | ENSAMEG00000017460 | CARMIL2      | capping protein regulator and myosin 1 linker 2    |
| Spleen | ENSAMEG00000017469 | FCMR         | Fc fragment of IgM receptor                        |
| Spleen | ENSAMEG00000017474 | IL24         | interleukin 24                                     |
| Spleen | ENSAMEG00000017521 | CD160        | CD160 molecule                                     |
| Spleen | ENSAMEG00000017527 | STMN2        | stathmin 2                                         |
| Spleen | ENSAMEG00000017567 | SH3RF2       | SH3 domain containing ring finger 2                |
| Spleen | ENSAMEG00000017604 | TLX1         | T cell leukemia homeobox 1                         |
| Spleen | ENSAMEG00000017709 | --           | --                                                 |
| Spleen | ENSAMEG00000018010 | CAMK1G       | calcium/calmodulin dependent protein kinase IG     |
| Spleen | ENSAMEG00000018026 | PTPN3        | protein tyrosine phosphatase, non-receptor type 3  |
| Spleen | ENSAMEG00000018031 | LEPR         | leptin receptor                                    |
| Spleen | ENSAMEG00000018076 | PTN          | pleiotrophin                                       |
| Spleen | ENSAMEG00000018086 | ASPG         | asparaginase                                       |
| Spleen | ENSAMEG00000018123 | BTLA         | B and T lymphocyte associated                      |
| Spleen | ENSAMEG00000018144 | GCSAM        | germinal center associated signaling and motility  |
| Spleen | ENSAMEG00000018148 | TAGLN3       | transgelin 3                                       |
| Spleen | ENSAMEG00000018170 | CD96         | CD96 molecule                                      |
| Spleen | ENSAMEG00000018202 | CA5A         | carbonic anhydrase 5A                              |
| Spleen | ENSAMEG00000018311 | RPS6KL1      | ribosomal protein S6 kinase like 1                 |
| Spleen | ENSAMEG00000018338 | BATF         | basic leucine zipper ATF-like transcription factor |

|        |                    |              |                                                                  |
|--------|--------------------|--------------|------------------------------------------------------------------|
| Spleen | ENSAMEG00000018458 | ARHGAP4      | Rho GTPase activating protein 4                                  |
| Spleen | ENSAMEG00000018488 | TLR10        | toll like receptor 10                                            |
| Spleen | ENSAMEG00000018603 | KCNE4        | potassium voltage-gated channel subfamily E regulatory subunit 4 |
| Spleen | ENSAMEG00000018668 | --           | --                                                               |
| Spleen | ENSAMEG00000018677 | LOC100482217 | profilin-1                                                       |
| Spleen | ENSAMEG00000018739 | --           | --                                                               |
| Spleen | ENSAMEG00000018766 | --           | --                                                               |
| Spleen | ENSAMEG00000018799 | --           | --                                                               |
| Spleen | ENSAMEG00000018807 | CHST1        | carbohydrate sulfotransferase 1                                  |
| Spleen | ENSAMEG00000018810 | GPR55        | G protein-coupled receptor 55                                    |
| Spleen | ENSAMEG00000018822 | TMEM125      | transmembrane protein 125                                        |
| Spleen | ENSAMEG00000018850 | PLN          | phospholamban                                                    |
| Spleen | ENSAMEG00000018888 | --           | --                                                               |
| Spleen | ENSAMEG00000018906 | LOC100474158 | olfactory receptor 10G9                                          |
| Spleen | ENSAMEG00000019079 | P2RY13       | purinergic receptor P2Y13                                        |
| Spleen | ENSAMEG00000019089 | DIRAS2       | DIRAS family GTPase 2                                            |
| Spleen | ENSAMEG00000019097 | LINGO4       | leucine rich repeat and Ig domain containing 4                   |
| Spleen | ENSAMEG00000019299 | --           | --                                                               |
| Spleen | ENSAMEG00000019310 | --           | --                                                               |
| Spleen | ENSAMEG00000019396 | XCR1         | X-C motif chemokine receptor 1                                   |
| Spleen | ENSAMEG00000019512 | --           | --                                                               |
| Spleen | ENSAMEG00000019552 | --           | --                                                               |
| Spleen | ENSAMEG00000019556 | --           | --                                                               |
| Spleen | ENSAMEG00000019561 | --           | --                                                               |
| Spleen | ENSAMEG00000019586 | AKAP5        | A-kinase anchoring protein 5                                     |
| Spleen | ENSAMEG00000019595 | CCR6         | C-C motif chemokine receptor 6                                   |
| Spleen | ENSAMEG00000019672 | --           | --                                                               |
| Spleen | ENSAMEG00000019767 | CXCR3        | C-X-C motif chemokine receptor 3                                 |
| Spleen | ENSAMEG00000019777 | TLR7         | toll like receptor 7                                             |
| Spleen | ENSAMEG00000019880 | LRRN2        | leucine rich repeat neuronal 2                                   |
| Spleen | ENSAMEG00000019904 | GPR65        | G protein-coupled receptor 65                                    |
| Spleen | ENSAMEG00000019956 | --           | --                                                               |
| Spleen | ENSAMEG00000020056 | RNASE13      | ribonuclease A family member 13 (inactive)                       |
| Spleen | ENSAMEG00000020100 | CH25H        | cholesterol 25-hydroxylase                                       |
| Spleen | ENSAMEG00000020118 | GPR18        | G protein-coupled receptor 18                                    |
| Spleen | ENSAMEG00000020141 | SMIM33       | small integral membrane protein 33                               |
| Spleen | ENSAMEG00000020150 | --           | --                                                               |
| Spleen | ENSAMEG00000020169 | P2RY10       | P2Y receptor family member 10                                    |
| Spleen | ENSAMEG00000020171 | GPR174       | G protein-coupled receptor 174                                   |
| Spleen | ENSAMEG00000020236 | --           | --                                                               |
| Spleen | Novel00102         | --           | neurotrimin, isoform CRA_b                                       |
| Spleen | Novel00110         | --           | hypothetical protein                                             |

|        |            |    |                                                                                            |
|--------|------------|----|--------------------------------------------------------------------------------------------|
| Spleen | Novel00149 | -- | --                                                                                         |
| Spleen | Novel00192 | -- | PREDICTED: collagen alpha-1(III) chain-like                                                |
| Spleen | Novel00204 | -- | --                                                                                         |
| Spleen | Novel00228 | -- | PREDICTED: fibrous sheath-interacting protein 1 isoform X2                                 |
| Spleen | Novel00253 | -- | hypothetical protein EGM_18659, partial                                                    |
| Spleen | Novel00314 | -- | --                                                                                         |
| Spleen | Novel00336 | -- | --                                                                                         |
| Spleen | Novel00372 | -- | --                                                                                         |
| Spleen | Novel00416 | -- | hypothetical protein, conserved                                                            |
| Spleen | Novel00421 | -- | --                                                                                         |
| Spleen | Novel00422 | -- | --                                                                                         |
| Spleen | Novel00494 | -- | --                                                                                         |
| Spleen | Novel00495 | -- | PREDICTED: uncharacterized protein LOC100464472, partial                                   |
| Spleen | Novel00505 | -- | unnamed protein product                                                                    |
| Spleen | Novel00507 | -- | PREDICTED: alpha-(1,6)-fucosyltransferase isoform X3                                       |
| Spleen | Novel00589 | -- | --                                                                                         |
| Spleen | Novel00654 | -- | --                                                                                         |
| Spleen | Novel00706 | -- | --                                                                                         |
| Spleen | Novel00889 | -- | --                                                                                         |
| Spleen | Novel00969 | -- | --                                                                                         |
| Spleen | Novel00996 | -- | --                                                                                         |
| Spleen | Novel01035 | -- | PREDICTED: N-acetyllactosaminide beta-1,6-N-acetylglucosaminyl-transferase, isoform A-like |
| Spleen | Novel01061 | -- | --                                                                                         |
| Spleen | Novel01062 | -- | PREDICTED: uncharacterized protein LOC100737626                                            |
| Spleen | Novel01068 | -- | --                                                                                         |
| Spleen | Novel01085 | -- | --                                                                                         |
| Spleen | Novel01169 | -- | --                                                                                         |
| Spleen | Novel01410 | -- | --                                                                                         |
| Spleen | Novel01424 | -- | --                                                                                         |
| Spleen | Novel01454 | -- | --                                                                                         |
| Spleen | Novel01457 | -- | PREDICTED: uncharacterized protein LOC609006                                               |
| Spleen | Novel01464 | -- | --                                                                                         |
| Spleen | Novel01475 | -- | --                                                                                         |
| Spleen | Novel01503 | -- | --                                                                                         |
| Spleen | Novel01507 | -- | --                                                                                         |
| Spleen | Novel01591 | -- | --                                                                                         |
| Spleen | Novel01600 | -- | --                                                                                         |
| Spleen | Novel01602 | -- | --                                                                                         |
| Spleen | Novel01636 | -- | PREDICTED: homeodomain-only protein isoform X1                                             |
| Spleen | Novel01645 | -- | --                                                                                         |
| Spleen | Novel01659 | -- | --                                                                                         |

|        |            |    |                                                                      |
|--------|------------|----|----------------------------------------------------------------------|
| Spleen | Novel01676 | -- | --                                                                   |
| Spleen | Novel01687 | -- | --                                                                   |
| Spleen | Novel01710 | -- | hypothetical protein M91_18372, partial                              |
| Spleen | Novel01738 | -- | --                                                                   |
| Spleen | Novel01758 | -- | PREDICTED: uncharacterized protein LOC105582071                      |
| Spleen | Novel01759 | -- | --                                                                   |
| Spleen | Novel01840 | -- | --                                                                   |
| Spleen | Novel01866 | -- | PREDICTED: proline-rich protein 2-like                               |
| Spleen | Novel01924 | -- | LRRGT00194                                                           |
| Spleen | Novel02011 | -- | --                                                                   |
| Spleen | Novel02030 | -- | --                                                                   |
| Spleen | Novel02036 | -- | --                                                                   |
| Spleen | Novel02053 | -- | --                                                                   |
| Spleen | Novel02089 | -- | --                                                                   |
| Spleen | Novel02091 | -- | LRRG00130                                                            |
| Spleen | Novel02106 | -- | --                                                                   |
| Spleen | Novel02146 | -- | hypothetical protein M91_20222, partial                              |
| Spleen | Novel02157 | -- | PREDICTED: unconventional myosin-XVB-like                            |
| Spleen | Novel02195 | -- | PREDICTED: LOW QUALITY PROTEIN: liprin-alpha-2                       |
| Spleen | Novel02220 | -- | --                                                                   |
| Spleen | Novel02221 | -- | --                                                                   |
| Spleen | Novel02237 | -- | PREDICTED: Fc receptor-like A isoform X1                             |
| Spleen | Novel02253 | -- | --                                                                   |
| Spleen | Novel02301 | -- | --                                                                   |
| Spleen | Novel02535 | -- | PREDICTED: LOW QUALITY PROTEIN: uncharacterized protein LOC105944309 |
| Spleen | Novel02538 | -- | --                                                                   |
| Spleen | Novel02558 | -- | --                                                                   |
| Spleen | Novel02560 | -- | PREDICTED: solute carrier family 40 member 1-like                    |
| Spleen | Novel02588 | -- | --                                                                   |
| Spleen | Novel02653 | -- | T cell receptor beta chain, partial                                  |
| Spleen | Novel02686 | -- | --                                                                   |
| Spleen | Novel02794 | -- | --                                                                   |
| Spleen | Novel02809 | -- | --                                                                   |
| Spleen | Novel02810 | -- | --                                                                   |
| Spleen | Novel02813 | -- | --                                                                   |
| Spleen | Novel02814 | -- | --                                                                   |
| Spleen | Novel02827 | -- | LRRGT00191                                                           |
| Spleen | Novel02845 | -- | --                                                                   |
| Spleen | Novel02947 | -- | hCG1820541, partial                                                  |
| Spleen | Novel03051 | -- | --                                                                   |
| Spleen | Novel03124 | -- | PREDICTED: catenin delta-2-like                                      |
| Spleen | Novel03158 | -- | --                                                                   |



|        |            |    |                                                                   |
|--------|------------|----|-------------------------------------------------------------------|
| Spleen | Novel03163 | -- | unnamed protein product                                           |
| Spleen | Novel03239 | -- | --                                                                |
| Spleen | Novel03265 | -- | --                                                                |
| Spleen | Novel03268 | -- | --                                                                |
| Spleen | Novel03320 | -- | unnamed protein product                                           |
| Spleen | Novel03410 | -- | --                                                                |
| Spleen | Novel03428 | -- | hypothetical protein EGM_19048, partial                           |
| Spleen | Novel03429 | -- | PREDICTED: uncharacterized protein LOC101134168                   |
| Spleen | Novel03492 | -- | PREDICTED: olfactory receptor 6C3-like                            |
| Spleen | Novel03495 | -- | --                                                                |
| Spleen | Novel03508 | -- | --                                                                |
| Spleen | Novel03532 | -- | --                                                                |
| Spleen | Novel03543 | -- | --                                                                |
| Spleen | Novel03551 | -- | protein Shroom4-like protein                                      |
| Spleen | Novel03601 | -- | --                                                                |
| Spleen | Novel03646 | -- | --                                                                |
| Spleen | Novel03675 | -- | --                                                                |
| Spleen | Novel03806 | -- | --                                                                |
| Spleen | Novel03845 | -- | hCG1759600                                                        |
| Spleen | Novel03909 | -- | hypothetical protein M91_11495, partial                           |
| Spleen | Novel03973 | -- | endonuclease/reverse transcriptase                                |
| Spleen | Novel03975 | -- | --                                                                |
| Spleen | Novel03976 | -- | --                                                                |
| Spleen | Novel03977 | -- | hypothetical protein PANDA_015862                                 |
| Spleen | Novel03988 | -- | unnamed protein product                                           |
| Spleen | Novel03989 | -- | PREDICTED: tigger transposable element-derived protein 1-like     |
| Spleen | Novel04004 | -- | hypothetical protein EGM_06233, partial                           |
| Spleen | Novel04047 | -- | --                                                                |
| Spleen | Novel04067 | -- | PREDICTED: tripartite motif-containing protein 34-like isoform X3 |
| Spleen | Novel04068 | -- | --                                                                |
| Spleen | Novel04101 | -- | --                                                                |
| Spleen | Novel04235 | -- | PREDICTED: stathmin domain-containing protein 1                   |
| Spleen | Novel04286 | -- | --                                                                |
| Spleen | Novel04346 | -- | --                                                                |
| Spleen | Novel04355 | -- | --                                                                |
| Spleen | Novel04371 | -- | --                                                                |
| Spleen | Novel04445 | -- | PREDICTED: LOW QUALITY PROTEIN: collagen alpha-4(VI) chain-like   |
| Spleen | Novel04465 | -- | --                                                                |
| Spleen | Novel04479 | -- | hypothetical protein M91_12176, partial                           |
| Spleen | Novel04539 | -- | hypothetical protein M91_00785, partial                           |

|        |                    |         |                                                                |
|--------|--------------------|---------|----------------------------------------------------------------|
| Spleen | Novel04574         | --      | --                                                             |
| Spleen | Novel04611         | --      | --                                                             |
| Spleen | Novel04690         | --      | --                                                             |
| Spleen | Novel04692         | --      | similar to ribosomal protein L17                               |
| Spleen | Novel04723         | --      | endonuclease/reverse transcriptase                             |
| Spleen | Novel04760         | --      | PREDICTED: T-lymphocyte surface antigen Ly-9-like, partial     |
| Spleen | Novel04792         | --      | --                                                             |
| Spleen | Novel04888         | --      | --                                                             |
| Spleen | Novel04891         | --      | --                                                             |
| Spleen | Novel04892         | --      | PREDICTED: calmodulin                                          |
| Spleen | Novel04915         | --      | --                                                             |
| Spleen | Novel04961         | --      | --                                                             |
| Spleen | Novel05049         | --      | PREDICTED: receptor-type tyrosine-protein phosphatase U-like   |
| Spleen | Novel05192         | --      | PREDICTED: uncharacterized protein LOC105234449                |
| Spleen | Novel05267         | --      | PREDICTED: T-cell receptor gamma chain C region C10.5          |
| Spleen | Novel05268         | --      | hypothetical protein PANDA_020698, partial                     |
| Spleen | Novel05320         | --      | --                                                             |
| Spleen | Novel05363         | --      | PREDICTED: guanylate cyclase soluble subunit alpha-2-like      |
| Spleen | Novel05368         | --      | hypothetical protein PANDA_020949, partial                     |
| Spleen | Novel05482         | --      | --                                                             |
| Spleen | Novel05519         | --      | --                                                             |
| Spleen | Novel05586         | --      | PREDICTED: CMRF35-like molecule 7                              |
| Spleen | Novel05601         | --      | --                                                             |
| Spleen | Novel05602         | --      | PREDICTED: Ig mu chain C region membrane-bound form isoform X5 |
| Spleen | Novel05630         | --      | --                                                             |
| Spleen | Novel05699         | --      | hypothetical protein PANDA_022568, partial                     |
| Spleen | Novel05700         | --      | hypothetical protein M91_07955                                 |
| Spleen | Novel05756         | --      | hypothetical protein PANDA_022245, partial                     |
| Spleen | Novel05789         | --      | hypothetical protein PANDA_022245, partial                     |
| Spleen | Novel05913         | --      | hypothetical protein PANDA_022433, partial                     |
| Spleen | Novel05962         | --      | --                                                             |
| Spleen | Novel06007         | --      | Ig lambda chain V-I region BL2                                 |
| Lung   | ENSAMEG00000000066 | ACP5    | acid phosphatase 5, tartrate resistant                         |
| Lung   | ENSAMEG00000000092 | --      | --                                                             |
| Lung   | ENSAMEG00000000119 | --      | --                                                             |
| Lung   | ENSAMEG00000000120 | --      | --                                                             |
| Lung   | ENSAMEG00000000260 | TACSTD2 | tumor associated calcium signal transducer 2                   |
| Lung   | ENSAMEG00000000330 | ZNF385B | zinc finger protein 385B                                       |
| Lung   | ENSAMEG00000000473 | TEKT2   | tektin 2                                                       |
| Lung   | ENSAMEG00000000567 | UPK1A   | uroplakin 1A                                                   |
| Lung   | ENSAMEG00000000586 | FGF10   | fibroblast growth factor 10                                    |

|      |                    |              |                                                                   |
|------|--------------------|--------------|-------------------------------------------------------------------|
| Lung | ENSAMEG00000000761 | VSIG2        | V-set and immunoglobulin domain containing 2                      |
| Lung | ENSAMEG00000000776 | KIAA1324L    | KIAA1324 like                                                     |
| Lung | ENSAMEG00000000840 | LOC100470906 | T-cell surface glycoprotein CD1a                                  |
| Lung | ENSAMEG00000000847 | LOC100471155 | T-cell surface glycoprotein CD1a                                  |
| Lung | ENSAMEG00000000874 | LOC100471652 | T-cell surface glycoprotein CD1a                                  |
| Lung | ENSAMEG00000000931 | FHOD3        | formin homology 2 domain containing 3                             |
| Lung | ENSAMEG00000000944 | TMEM212      | transmembrane protein 212                                         |
| Lung | ENSAMEG00000000972 | SCGB3A1      | secretoglobin family 3A member 1                                  |
| Lung | ENSAMEG00000000994 | KNG1         | kininogen 1                                                       |
| Lung | ENSAMEG00000001045 | C5           | complement C5                                                     |
| Lung | ENSAMEG00000001068 | RSPO1        | R-spondin 1                                                       |
| Lung | ENSAMEG00000001184 | CFTR         | cystic fibrosis transmembrane conductance regulator               |
| Lung | ENSAMEG00000001313 | --           | --                                                                |
| Lung | ENSAMEG00000001329 | KIF19        | kinesin family member 19                                          |
| Lung | ENSAMEG00000001508 | ADAM28       | ADAM metallopeptidase domain 28                                   |
| Lung | ENSAMEG00000001535 | SHC4         | SHC adaptor protein 4                                             |
| Lung | ENSAMEG00000001573 | LOC100481102 | keratin, type II cuticular Hb1                                    |
| Lung | ENSAMEG00000001642 | EFCAB1       | EF-hand calcium binding domain 1                                  |
| Lung | ENSAMEG00000001650 | ANKRD66      | ankyrin repeat domain 66                                          |
| Lung | ENSAMEG00000001677 | FCRLB        | Fc receptor like B                                                |
| Lung | ENSAMEG00000001683 | KRT7         | keratin 7                                                         |
| Lung | ENSAMEG00000001688 | GPR68        | G protein-coupled receptor 68                                     |
| Lung | ENSAMEG00000001725 | C1orf54      | chromosome 1 open reading frame 54                                |
| Lung | ENSAMEG00000001738 | IQCA1        | IQ motif containing with AAA domain 1                             |
| Lung | ENSAMEG00000001749 | --           | --                                                                |
| Lung | ENSAMEG00000001762 | SMIM41       | small integral membrane protein 41                                |
| Lung | ENSAMEG00000001798 | FAM183A      | family with sequence similarity 183 member A                      |
| Lung | ENSAMEG00000001888 | TSHR         | thyroid stimulating hormone receptor                              |
| Lung | ENSAMEG00000001940 | RSPH1        | radial spoke head 1 homolog                                       |
| Lung | ENSAMEG00000002023 | TFF1         | trefoil factor 1                                                  |
| Lung | ENSAMEG00000002265 | METTL7A      | methyltransferase like 7A                                         |
| Lung | ENSAMEG00000002295 | SLC22A18     | solute carrier family 22 member 18                                |
| Lung | ENSAMEG00000002301 | RASSF10      | Ras association domain family member 10                           |
| Lung | ENSAMEG00000002304 | --           | --                                                                |
| Lung | ENSAMEG00000002317 | SFTPB        | surfactant protein B                                              |
| Lung | ENSAMEG00000002492 | AGER         | advanced glycosylation end-product specific receptor              |
| Lung | ENSAMEG00000002502 | KNDC1        | kinase non-catalytic C-lobe domain containing 1                   |
| Lung | ENSAMEG00000002503 | APOBEC4      | apolipoprotein B mRNA editing enzyme catalytic polypeptide like 4 |
| Lung | ENSAMEG00000002575 | CFAP65       | cilia and flagella associated protein 65                          |
| Lung | ENSAMEG00000002584 | LOC105234745 | mucin-17-like                                                     |
| Lung | ENSAMEG00000002619 | MAK          | male germ cell associated kinase                                  |
| Lung | ENSAMEG00000002620 | ATP6V0D2     | ATPase H <sup>+</sup> transporting V0 subunit d2                  |

|      |                    |              |                                                                  |
|------|--------------------|--------------|------------------------------------------------------------------|
| Lung | ENSAMEG00000002626 | --           | --                                                               |
| Lung | ENSAMEG00000002682 | SLC1A1       | solute carrier family 1 member 1                                 |
| Lung | ENSAMEG00000002708 | OSR1         | odd-skipped related transcription factor 1                       |
| Lung | ENSAMEG00000002754 | MILR1        | mast cell immunoglobulin like receptor 1                         |
| Lung | ENSAMEG00000002762 | --           | --                                                               |
| Lung | ENSAMEG00000002782 | IDO1         | indoleamine 2,3-dioxygenase 1                                    |
| Lung | ENSAMEG00000002800 | ALOX15B      | arachidonate 15-lipoxygenase, type B                             |
| Lung | ENSAMEG00000002840 | C5orf49      | chromosome 5 open reading frame 49                               |
| Lung | ENSAMEG00000002893 | NKX2-1       | NK2 homeobox 1                                                   |
| Lung | ENSAMEG00000003066 | PDE1A        | phosphodiesterase 1A                                             |
| Lung | ENSAMEG00000003080 | CATIP        | ciliogenesis associated TTC17 interacting protein                |
| Lung | ENSAMEG00000003140 | PLA2G2E      | phospholipase A2 group IIE                                       |
| Lung | ENSAMEG00000003248 | TRPC6        | transient receptor potential cation channel subfamily C member 6 |
| Lung | ENSAMEG00000003331 | SFTPC        | surfactant protein C                                             |
| Lung | ENSAMEG00000003480 | C4BPA        | complement component 4 binding protein alpha                     |
| Lung | ENSAMEG00000003624 | FAM184A      | family with sequence similarity 184 member A                     |
| Lung | ENSAMEG00000003646 | RTKN2        | rhotekin 2                                                       |
| Lung | ENSAMEG00000003796 | LOC105234588 | IQ and AAA domain-containing protein 1                           |
| Lung | ENSAMEG00000003811 | TM4SF19      | transmembrane 4 L six family member 19                           |
| Lung | ENSAMEG00000003959 | SLC6A4       | solute carrier family 6 member 4                                 |
| Lung | ENSAMEG00000003989 | TESPA1       | thymocyte expressed, positive selection associated 1             |
| Lung | ENSAMEG00000004046 | --           | --                                                               |
| Lung | ENSAMEG00000004122 | C11orf16     | chromosome 11 open reading frame 16                              |
| Lung | ENSAMEG00000004298 | FAT3         | FAT atypical cadherin 3                                          |
| Lung | ENSAMEG00000004323 | C11orf88     | chromosome 11 open reading frame 88                              |
| Lung | ENSAMEG00000004329 | ABCC11       | ATP binding cassette subfamily C member 11                       |
| Lung | ENSAMEG00000004338 | POU2AF1      | POU class 2 associating factor 1                                 |
| Lung | ENSAMEG00000004432 | C13orf46     | chromosome 13 open reading frame 46                              |
| Lung | ENSAMEG00000004479 | CD79A        | CD79a molecule                                                   |
| Lung | ENSAMEG00000004515 | MUC15        | mucin 15, cell surface associated                                |
| Lung | ENSAMEG00000004557 | KIAA1324     | KIAA1324                                                         |
| Lung | ENSAMEG00000004693 | CLDN11       | claudin 11                                                       |
| Lung | ENSAMEG00000004775 | CSGALNACT1   | chondroitin sulfate N-acetylgalactosaminyltransferase 1          |
| Lung | ENSAMEG00000004777 | EDARADD      | EDAR associated death domain                                     |
| Lung | ENSAMEG00000004866 | TEX52        | testis expressed 52                                              |
| Lung | ENSAMEG00000004883 | IGHM         | immunoglobulin heavy constant mu                                 |
| Lung | ENSAMEG00000005003 | CXCL17       | C-X-C motif chemokine ligand 17                                  |
| Lung | ENSAMEG00000005020 | PLAC8        | placenta specific 8                                              |
| Lung | ENSAMEG00000005065 | PLB1         | phospholipase B1                                                 |
| Lung | ENSAMEG00000005188 | PTGFRN       | prostaglandin F2 receptor inhibitor                              |
| Lung | ENSAMEG00000005230 | BMP3         | bone morphogenetic protein 3                                     |
| Lung | ENSAMEG00000005284 | TFCP2L1      | transcription factor CP2 like 1                                  |

|      |                    |          |                                                             |
|------|--------------------|----------|-------------------------------------------------------------|
| Lung | ENSAMEG00000005292 | ANGPT2   | angiopoietin 2                                              |
| Lung | ENSAMEG00000005528 | DTHD1    | death domain containing 1                                   |
| Lung | ENSAMEG00000005665 | PIFO     | primary cilia formation                                     |
| Lung | ENSAMEG00000005685 | CALHM5   | calcium homeostasis modulator family member 5               |
| Lung | ENSAMEG00000005788 | CCL13    | C-C motif chemokine ligand 13                               |
| Lung | ENSAMEG00000005819 | FAM162B  | family with sequence similarity 162 member B                |
| Lung | ENSAMEG00000005826 | AMTN     | amelotin                                                    |
| Lung | ENSAMEG00000005851 | ROS1     | ROS proto-oncogene 1, receptor tyrosine kinase              |
| Lung | ENSAMEG00000005863 | JCHAIN   | joining chain of multimeric IgA and IgM                     |
| Lung | ENSAMEG00000005871 | FAR2     | fatty acyl-CoA reductase 2                                  |
| Lung | ENSAMEG00000005892 | HOXA6    | homeobox A6                                                 |
| Lung | ENSAMEG00000005927 | ATP10A   | ATPase phospholipid transporting 10A (putative)             |
| Lung | ENSAMEG00000005934 | --       | --                                                          |
| Lung | ENSAMEG00000006146 | CFAP161  | cilia and flagella associated protein 161                   |
| Lung | ENSAMEG00000006169 | CCDC81   | coiled-coil domain containing 81                            |
| Lung | ENSAMEG00000006173 | GRAMD2A  | GRAM domain containing 2A                                   |
| Lung | ENSAMEG00000006234 | CLDN18   | claudin 18                                                  |
| Lung | ENSAMEG00000006313 | --       | --                                                          |
| Lung | ENSAMEG00000006446 | SULT1C2  | sulfotransferase family 1C member 2                         |
| Lung | ENSAMEG00000006640 | COLEC12  | collectin subfamily member 12                               |
| Lung | ENSAMEG00000006653 | PTTG1    | PTTG1 regulator of sister chromatid separation, securin     |
| Lung | ENSAMEG00000006741 | NOD2     | nucleotide binding oligomerization domain containing 2      |
| Lung | ENSAMEG00000006809 | SCUBE1   | signal peptide, CUB domain and EGF like domain containing 1 |
| Lung | ENSAMEG00000006864 | TCAF2    | TRPM8 channel associated factor 2                           |
| Lung | ENSAMEG00000006960 | AQP8     | aquaporin 8                                                 |
| Lung | ENSAMEG00000007039 | --       | --                                                          |
| Lung | ENSAMEG00000007135 | --       | --                                                          |
| Lung | ENSAMEG00000007150 | --       | --                                                          |
| Lung | ENSAMEG00000007198 | PLA2G3   | phospholipase A2 group III                                  |
| Lung | ENSAMEG00000007209 | INPP5J   | inositol polyphosphate-5-phosphatase J                      |
| Lung | ENSAMEG00000007288 | A3GALT2  | alpha 1,3-galactosyltransferase 2                           |
| Lung | ENSAMEG00000007300 | UPK1B    | uroplakin 1B                                                |
| Lung | ENSAMEG00000007480 | SEC14L4  | SEC14 like lipid binding 4                                  |
| Lung | ENSAMEG00000007483 | SEC14L3  | SEC14 like lipid binding 3                                  |
| Lung | ENSAMEG00000007517 | HAPLN1   | hyaluronan and proteoglycan link protein 1                  |
| Lung | ENSAMEG00000007545 | CDKN2B   | cyclin dependent kinase inhibitor 2B                        |
| Lung | ENSAMEG00000007593 | --       | --                                                          |
| Lung | ENSAMEG00000007633 | --       | --                                                          |
| Lung | ENSAMEG00000007821 | DCDC2B   | doublecortin domain containing 2B                           |
| Lung | ENSAMEG00000007894 | CAPS     | calcyphosine                                                |
| Lung | ENSAMEG00000007915 | MCTP1    | multiple C2 and transmembrane domain containing 1           |
| Lung | ENSAMEG00000007952 | SLC22A31 | solute carrier family 22 member 31                          |

|      |                    |              |                                                              |
|------|--------------------|--------------|--------------------------------------------------------------|
| Lung | ENSAMEG00000008000 | DDC          | dopa decarboxylase                                           |
| Lung | ENSAMEG00000008079 | --           | --                                                           |
| Lung | ENSAMEG00000008174 | SPATA18      | spermatogenesis associated 18                                |
| Lung | ENSAMEG00000008217 | --           | --                                                           |
| Lung | ENSAMEG00000008258 | NKD2         | naked cuticle homolog 2                                      |
| Lung | ENSAMEG00000008427 | --           | --                                                           |
| Lung | ENSAMEG00000008448 | VIPR2        | vasoactive intestinal peptide receptor 2                     |
| Lung | ENSAMEG00000008534 | HOPX         | HOP homeobox                                                 |
| Lung | ENSAMEG00000008555 | LOC105234723 | sciellin                                                     |
| Lung | ENSAMEG00000008599 | PKHD1        | PKHD1 ciliary IPT domain containing fibrocystin/polyductin   |
| Lung | ENSAMEG00000008662 | APOA1        | Apolipoprotein A-I                                           |
| Lung | ENSAMEG00000008683 | --           | --                                                           |
| Lung | ENSAMEG00000008789 | FAM196B      | family with sequence similarity 196 member B                 |
| Lung | ENSAMEG00000008802 | TBX4         | T-box 4                                                      |
| Lung | ENSAMEG00000008863 | ACSM2B       | acyl-CoA synthetase medium chain family member 2B            |
| Lung | ENSAMEG00000008871 | FAM216B      | family with sequence similarity 216 member B                 |
| Lung | ENSAMEG00000008913 | --           | --                                                           |
| Lung | ENSAMEG00000008921 | LOC105242279 | thrombospondin type-1 domain-containing protein 7B           |
| Lung | ENSAMEG00000008938 | RIBC2        | RIB43A domain with coiled-coils 2                            |
| Lung | ENSAMEG00000008984 | GP2          | glycoprotein 2                                               |
| Lung | ENSAMEG00000009007 | LOC100478867 | radial spoke head 10 homolog B                               |
| Lung | ENSAMEG00000009009 | TSPAN19      | tetraspanin 19                                               |
| Lung | ENSAMEG00000009010 | BICD1        | BICD cargo adaptor 1                                         |
| Lung | ENSAMEG00000009043 | --           | --                                                           |
| Lung | ENSAMEG00000009264 | C15orf59     | chromosome 15 open reading frame 59                          |
| Lung | ENSAMEG00000009278 | TBXT         | T-box transcription factor T                                 |
| Lung | ENSAMEG00000009292 | GDPD2        | glycerophosphodiester phosphodiesterase domain containing 2  |
| Lung | ENSAMEG00000009399 | P2RX1        | purinergic receptor P2X 1                                    |
| Lung | ENSAMEG00000009440 | LOC100472452 | cytochrome P450 2D15                                         |
| Lung | ENSAMEG00000009442 | CCNO         | cyclin O                                                     |
| Lung | ENSAMEG00000009525 | --           | --                                                           |
| Lung | ENSAMEG00000009526 | ACOXL        | acyl-CoA oxidase like                                        |
| Lung | ENSAMEG00000009530 | C8orf34      | chromosome 8 open reading frame 34                           |
| Lung | ENSAMEG00000009646 | NPHP1        | nephrocystin 1                                               |
| Lung | ENSAMEG00000009731 | LDLRAD1      | low density lipoprotein receptor class A domain containing 1 |
| Lung | ENSAMEG00000009849 | CD93         | CD93 molecule                                                |
| Lung | ENSAMEG00000009876 | GRID1        | glutamate ionotropic receptor delta type subunit 1           |
| Lung | ENSAMEG00000009981 | ANGPTL5      | angiopoietin like 5                                          |
| Lung | ENSAMEG00000009985 | CEP126       | centrosomal protein 126                                      |
| Lung | ENSAMEG00000010030 | PNMT         | phenylethanolamine N-methyltransferase                       |
| Lung | ENSAMEG00000010062 | LOC100477293 | annexin A8                                                   |

|      |                    |              |                                                                      |
|------|--------------------|--------------|----------------------------------------------------------------------|
| Lung | ENSAMEG00000010166 | --           | --                                                                   |
| Lung | ENSAMEG00000010185 | --           | --                                                                   |
| Lung | ENSAMEG00000010189 | --           | --                                                                   |
| Lung | ENSAMEG00000010232 | KIAA0319     | KIAA0319                                                             |
| Lung | ENSAMEG00000010289 | F7           | coagulation factor VII                                               |
| Lung | ENSAMEG00000010294 | GPLD1        | glycosylphosphatidylinositol specific phospholipase D1               |
| Lung | ENSAMEG00000010479 | --           | --                                                                   |
| Lung | ENSAMEG00000010522 | CFAP46       | cilia and flagella associated protein 46                             |
| Lung | ENSAMEG00000010541 | AGR2         | anterior gradient 2, protein disulphide isomerase family member      |
| Lung | ENSAMEG00000010687 | GSG1         | germ cell associated 1                                               |
| Lung | ENSAMEG00000010738 | GPRC5A       | G protein-coupled receptor class C group 5 member A                  |
| Lung | ENSAMEG00000010782 | ST8SIA2      | ST8 alpha-N-acetyl-neuraminide alpha-2,8-sialyltransferase 2         |
| Lung | ENSAMEG00000010788 | SPEF1        | sperm flagellar 1                                                    |
| Lung | ENSAMEG00000010815 | --           | --                                                                   |
| Lung | ENSAMEG00000010825 | SPTBN2       | spectrin beta, non-erythrocytic 2                                    |
| Lung | ENSAMEG00000010938 | NRG2         | neuregulin 2                                                         |
| Lung | ENSAMEG00000010959 | FGFR2        | fibroblast growth factor receptor 2                                  |
| Lung | ENSAMEG00000010989 | CCL26        | C-C motif chemokine ligand 26                                        |
| Lung | ENSAMEG00000011029 | SOX2         | SRY-box 2                                                            |
| Lung | ENSAMEG00000011032 | CCDC39       | coiled-coil domain containing 39                                     |
| Lung | ENSAMEG00000011038 | LRRC74B      | leucine rich repeat containing 74B                                   |
| Lung | ENSAMEG00000011045 | TM4SF18      | transmembrane 4 L six family member 18                               |
| Lung | ENSAMEG00000011060 | --           | --                                                                   |
| Lung | ENSAMEG00000011277 | CUNH4orf19   | chromosome unknown C4orf19 homolog                                   |
| Lung | ENSAMEG00000011375 | CRLF1        | cytokine receptor like factor 1                                      |
| Lung | ENSAMEG00000011494 | FBP1         | fructose-bisphosphatase 1                                            |
| Lung | ENSAMEG00000011512 | NYAP2        | neuronal tyrosine-phosphorylated phosphoinositide-3-kinase adaptor 2 |
| Lung | ENSAMEG00000011544 | --           | --                                                                   |
| Lung | ENSAMEG00000011666 | ZMYND10      | zinc finger MYND-type containing 10                                  |
| Lung | ENSAMEG00000011683 | --           | --                                                                   |
| Lung | ENSAMEG00000011776 | TCTE1        | t-complex-associated-testis-expressed 1                              |
| Lung | ENSAMEG00000011844 | SLC25A34     | solute carrier family 25 member 34                                   |
| Lung | ENSAMEG00000011870 | SLC38A3      | solute carrier family 38 member 3                                    |
| Lung | ENSAMEG00000011898 | CFH          | complement factor H                                                  |
| Lung | ENSAMEG00000011913 | RIMS3        | regulating synaptic membrane exocytosis 3                            |
| Lung | ENSAMEG00000011916 | CDH2         | cadherin 2                                                           |
| Lung | ENSAMEG00000011960 | LOC100465091 | cytochrome P450 2A13-like                                            |
| Lung | ENSAMEG00000012034 | VWA5A        | von Willebrand factor A domain containing 5A                         |
| Lung | ENSAMEG00000012233 | VLDLR        | very low density lipoprotein receptor                                |
| Lung | ENSAMEG00000012290 | CDHR4        | cadherin related family member 4                                     |

|      |                    |              |                                                            |
|------|--------------------|--------------|------------------------------------------------------------|
| Lung | ENSAMEG00000012467 | PRX          | periaxin                                                   |
| Lung | ENSAMEG00000012556 | LOC100474871 | alpha-1-acid glycoprotein                                  |
| Lung | ENSAMEG00000012696 | C2orf85      | chromosome 20 open reading frame 85                        |
| Lung | ENSAMEG00000012956 | SLC44A4      | solute carrier family 44 member 4                          |
| Lung | ENSAMEG00000012974 | --           | --                                                         |
| Lung | ENSAMEG00000012994 | --           | --                                                         |
| Lung | ENSAMEG00000013003 | SFTPD        | surfactant protein D                                       |
| Lung | ENSAMEG00000013016 | LOC100482856 | pulmonary surfactant-associated protein A                  |
| Lung | ENSAMEG00000013142 | --           | --                                                         |
| Lung | ENSAMEG00000013166 | CD3E         | CD3e molecule                                              |
| Lung | ENSAMEG00000013243 | NAPSA        | napsin A aspartic peptidase                                |
| Lung | ENSAMEG00000013319 | CDHR3        | cadherin related family member 3                           |
| Lung | ENSAMEG00000013403 | CLIC3        | chloride intracellular channel 3                           |
| Lung | ENSAMEG00000013419 | --           | --                                                         |
| Lung | ENSAMEG00000013508 | VWA3B        | von Willebrand factor A domain containing 3B               |
| Lung | ENSAMEG00000013516 | OMD          | osteomodulin                                               |
| Lung | ENSAMEG00000013530 | UCMA         | upper zone of growth plate and cartilage matrix associated |
| Lung | ENSAMEG00000013547 | --           | --                                                         |
| Lung | ENSAMEG00000013757 | SLC24A4      | solute carrier family 24 member 4                          |
| Lung | ENSAMEG00000013814 | TSPAN1       | tetraspanin 1                                              |
| Lung | ENSAMEG00000013822 | RBP4         | retinol binding protein 4                                  |
| Lung | ENSAMEG00000013869 | A2M          | alpha-2-macroglobulin                                      |
| Lung | ENSAMEG00000013885 | LRRC23       | leucine rich repeat containing 23                          |
| Lung | ENSAMEG00000014075 | CYP4B1       | cytochrome P450 family 4 subfamily B member 1              |
| Lung | ENSAMEG00000014219 | AQP4         | aquaporin 4                                                |
| Lung | ENSAMEG00000014281 | --           | --                                                         |
| Lung | ENSAMEG00000014282 | IGLON5       | IgLON family member 5                                      |
| Lung | ENSAMEG00000014494 | KCNA7        | potassium voltage-gated channel subfamily A member 7       |
| Lung | ENSAMEG00000014501 | LHB          | lutinizing hormone beta polypeptide (LHB)                  |
| Lung | ENSAMEG00000014666 | TPO          | thyroid peroxidase                                         |
| Lung | ENSAMEG00000014671 | C9orf24      | chromosome 9 open reading frame 24                         |
| Lung | ENSAMEG00000014693 | NPY1R        | neuropeptide Y receptor Y1                                 |
| Lung | ENSAMEG00000014699 | NPY5R        | neuropeptide Y receptor Y5                                 |
| Lung | ENSAMEG00000014750 | GRIA3        | glutamate ionotropic receptor AMPA type subunit 3          |
| Lung | ENSAMEG00000014774 | GAS2         | growth arrest specific 2                                   |
| Lung | ENSAMEG00000014824 | KANK4        | KN motif and ankyrin repeat domains 4                      |
| Lung | ENSAMEG00000014850 | ENPEP        | glutamyl aminopeptidase                                    |
| Lung | ENSAMEG00000014938 | TC2N         | tandem C2 domains, nuclear                                 |
| Lung | ENSAMEG00000015118 | INSC         | INSC, spindle orientation adaptor protein                  |
| Lung | ENSAMEG00000015132 | --           | --                                                         |
| Lung | ENSAMEG00000015141 | CCDC40       | coiled-coil domain containing 40                           |
| Lung | ENSAMEG00000015212 | ALPK2        | alpha kinase 2                                             |
| Lung | ENSAMEG00000015296 | SNTN         | sentan, cilia apical structure protein                     |



|      |                    |          |                                                         |
|------|--------------------|----------|---------------------------------------------------------|
| Lung | ENSAMEG00000015366 | --       | --                                                      |
| Lung | ENSAMEG00000015481 | SUSD4    | sushi domain containing 4                               |
| Lung | ENSAMEG00000015616 | CD7      | CD7 molecule                                            |
| Lung | ENSAMEG00000015682 | --       | --                                                      |
| Lung | ENSAMEG00000015711 | PRDM6    | PR/SET domain 6                                         |
| Lung | ENSAMEG00000015799 | LRRK2    | leucine rich repeat kinase 2                            |
| Lung | ENSAMEG00000015997 | LAMP3    | lysosomal associated membrane protein 3                 |
| Lung | ENSAMEG00000016264 | STOML3   | stomatin like 3                                         |
| Lung | ENSAMEG00000016308 | WNT3A    | Wnt family member 3A                                    |
| Lung | ENSAMEG00000016313 | PLA2G4D  | phospholipase A2 group IVD                              |
| Lung | ENSAMEG00000016338 | PLA2G4E  | phospholipase A2 group IVE                              |
| Lung | ENSAMEG00000016356 | CLEC10A  | C-type lectin domain containing 10A                     |
| Lung | ENSAMEG00000016488 | SLC6A2   | solute carrier family 6 member 2                        |
| Lung | ENSAMEG00000016510 | GFRA3    | GDNF family receptor alpha 3                            |
| Lung | ENSAMEG00000016548 | FOXP4    | forkhead box N4                                         |
| Lung | ENSAMEG00000016613 | PPP1R32  | protein phosphatase 1 regulatory subunit 32             |
| Lung | ENSAMEG00000016719 | SEMA3E   | semaphorin 3E                                           |
| Lung | ENSAMEG00000016732 | ETV5     | ETS variant 5                                           |
| Lung | ENSAMEG00000016881 | TMTC2    | transmembrane and tetratricopeptide repeat containing 2 |
| Lung | ENSAMEG00000016897 | EPHB3    | EPH receptor B3                                         |
| Lung | ENSAMEG00000016999 | CHST8    | carbohydrate sulfotransferase 8                         |
| Lung | ENSAMEG00000017015 | --       | --                                                      |
| Lung | ENSAMEG00000017168 | PGM2L1   | phosphoglucomutase 2 like 1                             |
| Lung | ENSAMEG00000017190 | P4HA3    | prolyl 4-hydroxylase subunit alpha 3                    |
| Lung | ENSAMEG00000017238 | HSF4     | heat shock transcription factor 4                       |
| Lung | ENSAMEG00000017246 | DDAH1    | dimethylarginine dimethylaminohydrolase 1               |
| Lung | ENSAMEG00000017265 | WDR63    | WD repeat domain 63                                     |
| Lung | ENSAMEG00000017389 | HSD11B2  | hydroxysteroid 11-beta dehydrogenase 2                  |
| Lung | ENSAMEG00000017432 | --       | --                                                      |
| Lung | ENSAMEG00000017435 | ARHGEF38 | Rho guanine nucleotide exchange factor 38               |
| Lung | ENSAMEG00000017793 | DLEC1    | deleted in lung and esophageal cancer 1                 |
| Lung | ENSAMEG00000017827 | PALD1    | phosphatase domain containing, paladin 1                |
| Lung | ENSAMEG00000017862 | ABCA3    | ATP binding cassette subfamily A member 3               |
| Lung | ENSAMEG00000017954 | ATP6V0A4 | ATPase H+ transporting V0 subunit a4                    |
| Lung | ENSAMEG00000018020 | C9orf152 | chromosome 9 open reading frame 152                     |
| Lung | ENSAMEG00000018041 | GSTO2    | glutathione S-transferase omega 2                       |
| Lung | ENSAMEG00000018105 | SLC34A2  | solute carrier family 34 member 2                       |
| Lung | ENSAMEG00000018118 | TTPA     | alpha tocopherol transfer protein                       |
| Lung | ENSAMEG00000018130 | --       | --                                                      |
| Lung | ENSAMEG00000018266 | FOXP1    | forkhead box F1                                         |
| Lung | ENSAMEG00000018312 | CD300LG  | CD300 molecule like family member g                     |
| Lung | ENSAMEG00000018389 | HIGD1B   | HIG1 hypoxia inducible domain family member 1B          |
| Lung | ENSAMEG00000018442 | FHDC1    | FH2 domain containing 1                                 |

|      |                    |              |                                                                         |
|------|--------------------|--------------|-------------------------------------------------------------------------|
| Lung | ENSAMEG00000018799 | --           | --                                                                      |
| Lung | ENSAMEG00000018847 | LOC100482402 | olfactory receptor 51L1                                                 |
| Lung | ENSAMEG00000019453 | LOC100477677 | carbohydrate sulfotransferase 6                                         |
| Lung | ENSAMEG00000019512 | --           | --                                                                      |
| Lung | ENSAMEG00000019577 | LOC100477491 | olfactory receptor 1F1                                                  |
| Lung | ENSAMEG00000019607 | --           | --                                                                      |
| Lung | ENSAMEG00000019729 | FPR2         | formyl peptide receptor 2                                               |
| Lung | ENSAMEG00000019739 | FLRT3        | fibronectin leucine rich transmembrane protein 3                        |
| Lung | ENSAMEG00000019773 | --           | --                                                                      |
| Lung | ENSAMEG00000019810 | LOC100469231 | neuroendocrine secretory protein 55                                     |
| Lung | ENSAMEG00000020025 | APLNR        | apelin receptor                                                         |
| Lung | Novel00020         | --           | --                                                                      |
| Lung | Novel00064         | --           | PREDICTED: alpha-1B adrenergic receptor                                 |
| Lung | Novel00066         | --           | --                                                                      |
| Lung | Novel00082         | --           | hypothetical protein PANDA_000426, partial                              |
| Lung | Novel00113         | --           | --                                                                      |
| Lung | Novel00139         | --           | --                                                                      |
| Lung | Novel00140         | --           | hypothetical protein M91_05014, partial                                 |
| Lung | Novel00207         | --           | rCG65845                                                                |
| Lung | Novel00269         | --           | hypothetical protein PANDA_001238, partial                              |
| Lung | Novel00281         | --           | Histone acetyltransferase MYST3                                         |
| Lung | Novel00283         | --           | --                                                                      |
| Lung | Novel00387         | --           | perforin                                                                |
| Lung | Novel00436         | --           | --                                                                      |
| Lung | Novel00460         | --           | unnamed protein product                                                 |
| Lung | Novel00601         | --           | --                                                                      |
| Lung | Novel00610         | --           | PREDICTED: spermatogenesis-associated serine-rich protein 1             |
| Lung | Novel00660         | --           | PREDICTED: LOW QUALITY PROTEIN: papilin                                 |
| Lung | Novel00670         | --           | hypothetical protein PANDA_002650, partial                              |
| Lung | Novel00688         | --           | PREDICTED: transmembrane protein 2 isoform X2                           |
| Lung | Novel00693         | --           | --                                                                      |
| Lung | Novel00727         | --           | hypothetical protein EGK_05727, partial                                 |
| Lung | Novel00780         | --           | --                                                                      |
| Lung | Novel00801         | --           | --                                                                      |
| Lung | Novel00814         | --           | PREDICTED: cyclin-related protein FAM58A, partial                       |
| Lung | Novel00833         | --           | --                                                                      |
| Lung | Novel01080         | --           | endonuclease/reverse transcriptase                                      |
| Lung | Novel01105         | --           | --                                                                      |
| Lung | Novel01152         | --           | --                                                                      |
| Lung | Novel01196         | --           | --                                                                      |
| Lung | Novel01234         | --           | PREDICTED: transmembrane and TPR repeat-containing protein 1 isoform X6 |

|      |            |    |                                                                                         |
|------|------------|----|-----------------------------------------------------------------------------------------|
| Lung | Novel01296 | -- | --                                                                                      |
| Lung | Novel01299 | -- | --                                                                                      |
| Lung | Novel01330 | -- | hypothetical protein BRAFLDRAFT_124569                                                  |
| Lung | Novel01419 | -- | --                                                                                      |
| Lung | Novel01480 | -- | hypothetical protein M91_16134, partial                                                 |
| Lung | Novel01485 | -- | --                                                                                      |
| Lung | Novel01486 | -- | --                                                                                      |
| Lung | Novel01492 | -- | --                                                                                      |
| Lung | Novel01495 | -- | --                                                                                      |
| Lung | Novel01540 | -- | --                                                                                      |
| Lung | Novel01595 | -- | --                                                                                      |
| Lung | Novel01634 | -- | --                                                                                      |
| Lung | Novel01636 | -- | PREDICTED: homeodomain-only protein isoform X1                                          |
| Lung | Novel01637 | -- | hypothetical protein M91_18560, partial                                                 |
| Lung | Novel01638 | -- | --                                                                                      |
| Lung | Novel01693 | -- | hypothetical protein EGM_15239, partial                                                 |
| Lung | Novel01709 | -- | --                                                                                      |
| Lung | Novel01711 | -- | PREDICTED: protein N-terminal asparagine amidohydrolase isoform 1                       |
| Lung | Novel01715 | -- | --                                                                                      |
| Lung | Novel01834 | -- | --                                                                                      |
| Lung | Novel01854 | -- | --                                                                                      |
| Lung | Novel01889 | -- | --                                                                                      |
| Lung | Novel02130 | -- | hypothetical protein M91_14620                                                          |
| Lung | Novel02146 | -- | hypothetical protein M91_20222, partial                                                 |
| Lung | Novel02191 | -- | --                                                                                      |
| Lung | Novel02323 | -- | --                                                                                      |
| Lung | Novel02344 | -- | PREDICTED: T-box transcription factor TBX1                                              |
| Lung | Novel02444 | -- | PREDICTED: granulocyte-macrophage colony-stimulating factor receptor subunit alpha-like |
| Lung | Novel02477 | -- | --                                                                                      |
| Lung | Novel02527 | -- | --                                                                                      |
| Lung | Novel02539 | -- | --                                                                                      |
| Lung | Novel02594 | -- | --                                                                                      |
| Lung | Novel02602 | -- | PREDICTED: adaptin ear-binding coat-associated protein 1                                |
| Lung | Novel02625 | -- | --                                                                                      |
| Lung | Novel02646 | -- | PREDICTED: LOW QUALITY PROTEIN: protein phosphatase 1 regulatory subunit 3A             |
| Lung | Novel02648 | -- | hypothetical protein M91_14620                                                          |
| Lung | Novel02695 | -- | Retrovirus-related Pol polyprotein LINE-1                                               |
| Lung | Novel02723 | -- | PREDICTED: LOW QUALITY PROTEIN: transmembrane protein 200C                              |
| Lung | Novel02724 | -- | putative p150                                                                           |

|      |            |    |                                                                                            |
|------|------------|----|--------------------------------------------------------------------------------------------|
| Lung | Novel02727 | -- | --                                                                                         |
| Lung | Novel02742 | -- | --                                                                                         |
| Lung | Novel02751 | -- | --                                                                                         |
| Lung | Novel02778 | -- | --                                                                                         |
| Lung | Novel02904 | -- | hypothetical protein PANDA_011658, partial                                                 |
| Lung | Novel02931 | -- | hCG1813636                                                                                 |
| Lung | Novel02943 | -- | --                                                                                         |
| Lung | Novel02947 | -- | hCG1820541, partial                                                                        |
| Lung | Novel02993 | -- | --                                                                                         |
| Lung | Novel02996 | -- | --                                                                                         |
| Lung | Novel03051 | -- | --                                                                                         |
| Lung | Novel03130 | -- | PREDICTED: thioredoxin domain-containing protein 6 isoform X3                              |
| Lung | Novel03271 | -- | --                                                                                         |
| Lung | Novel03466 | -- | PREDICTED: T-box transcription factor TBX4                                                 |
| Lung | Novel03507 | -- | --                                                                                         |
| Lung | Novel03542 | -- | PREDICTED: killer cell lectin-like receptor 2                                              |
| Lung | Novel03583 | -- | PREDICTED: killer cell lectin-like receptor 2                                              |
| Lung | Novel03612 | -- | --                                                                                         |
| Lung | Novel03615 | -- | --                                                                                         |
| Lung | Novel03748 | -- | 60S ribosomal protein L32-like protein                                                     |
| Lung | Novel03749 | -- | --                                                                                         |
| Lung | Novel03779 | -- | PREDICTED: sciellin                                                                        |
| Lung | Novel03823 | -- | PREDICTED: LOW QUALITY PROTEIN: putative histone-lysine N-methyltransferase PRDM6, partial |
| Lung | Novel03933 | -- | --                                                                                         |
| Lung | Novel03958 | -- | --                                                                                         |
| Lung | Novel03963 | -- | RIKEN cDNA 5330421F07, partial                                                             |
| Lung | Novel04021 | -- | --                                                                                         |
| Lung | Novel04123 | -- | --                                                                                         |
| Lung | Novel04135 | -- | PREDICTED: collagen alpha-1(II) chain-like                                                 |
| Lung | Novel04198 | -- | LINE-1 element ORF2 (predicted)                                                            |
| Lung | Novel04201 | -- | unnamed protein product                                                                    |
| Lung | Novel04296 | -- | PREDICTED: LOW QUALITY PROTEIN: proto-oncogene tyrosine-protein kinase ROS-like            |
| Lung | Novel04309 | -- | hypothetical protein H671_1g0331                                                           |
| Lung | Novel04317 | -- | --                                                                                         |
| Lung | Novel04441 | -- | PREDICTED: uncharacterized protein LOC102160087                                            |
| Lung | Novel04485 | -- | --                                                                                         |
| Lung | Novel04529 | -- | --                                                                                         |
| Lung | Novel04546 | -- | ORF4                                                                                       |
| Lung | Novel04723 | -- | endonuclease/reverse transcriptase                                                         |
| Lung | Novel04727 | -- | hypothetical protein PAL_GLEAN10005188                                                     |

|        |                    |         |                                                                                       |
|--------|--------------------|---------|---------------------------------------------------------------------------------------|
| Lung   | Novel04728         | --      | --                                                                                    |
| Lung   | Novel04772         | --      | --                                                                                    |
| Lung   | Novel04785         | --      | PREDICTED: surfactant-associated protein 2                                            |
| Lung   | Novel04813         | --      | PREDICTED: dynein heavy chain 9, axonemal                                             |
| Lung   | Novel04861         | --      | --                                                                                    |
| Lung   | Novel04862         | --      | --                                                                                    |
| Lung   | Novel04891         | --      | --                                                                                    |
| Lung   | Novel04997         | --      | --                                                                                    |
| Lung   | Novel05003         | --      | --                                                                                    |
| Lung   | Novel05019         | --      | --                                                                                    |
| Lung   | Novel05123         | --      | PREDICTED: uncharacterized protein LOC105242333                                       |
| Lung   | Novel05140         | --      | PREDICTED: acyl-coenzyme A oxidase-like protein, partial                              |
| Lung   | Novel05184         | --      | --                                                                                    |
| Lung   | Novel05228         | --      | transposase                                                                           |
| Lung   | Novel05240         | --      | PREDICTED: LOW QUALITY PROTEIN: gamma-aminobutyric acid type B receptor subunit 1     |
| Lung   | Novel05290         | --      | PREDICTED: LOW QUALITY PROTEIN: pregnancy zone protein-like, partial                  |
| Lung   | Novel05332         | --      | --                                                                                    |
| Lung   | Novel05360         | --      | PREDICTED: uncharacterized protein LOC102471881 isoform X2                            |
| Lung   | Novel05372         | --      | hypothetical protein M91_17975                                                        |
| Lung   | Novel05383         | --      | --                                                                                    |
| Lung   | Novel05444         | --      | PREDICTED: sphingosine-1-phosphate phosphatase 2-like                                 |
| Lung   | Novel05575         | --      | --                                                                                    |
| Lung   | Novel05619         | --      | PREDICTED: carcinoembryonic antigen-related cell adhesion molecule 21-like isoform X1 |
| Lung   | Novel05630         | --      | --                                                                                    |
| Lung   | Novel05683         | --      | PREDICTED: putative 60S ribosomal protein L37a                                        |
| Lung   | Novel05700         | --      | hypothetical protein M91_07955                                                        |
| Lung   | Novel05701         | --      | --                                                                                    |
| Lung   | Novel05713         | --      | --                                                                                    |
| Lung   | Novel05741         | --      | --                                                                                    |
| Lung   | Novel05756         | --      | hypothetical protein PANDA_022245, partial                                            |
| Lung   | Novel05789         | --      | hypothetical protein PANDA_022245, partial                                            |
| Lung   | Novel05889         | --      | PREDICTED: leucine-rich repeat-containing protein-like                                |
| Lung   | Novel05913         | --      | hypothetical protein PANDA_022433, partial                                            |
| Lung   | Novel05950         | --      | PREDICTED: putative solute carrier family 22 member 31 isoform X3                     |
| Lung   | Novel06033         | --      | PREDICTED: cadherin-15-like                                                           |
| Kidney | ENSAMEG00000000008 | SLC13A3 | solute carrier family 13 member 3                                                     |
| Kidney | ENSAMEG00000000025 | CCDC148 | coiled-coil domain containing 148                                                     |
| Kidney | ENSAMEG00000000030 | PDZD3   | PDZ domain containing 3                                                               |

|        |                    |              |                                                             |
|--------|--------------------|--------------|-------------------------------------------------------------|
| Kidney | ENSAMEG00000000089 | SFRP5        | secreted frizzled related protein 5                         |
| Kidney | ENSAMEG00000000107 | HOGA1        | 4-hydroxy-2-oxoglutarate aldolase 1                         |
| Kidney | ENSAMEG00000000246 | CLRN3        | clarin 3                                                    |
| Kidney | ENSAMEG00000000277 | FGGY         | FGGY carbohydrate kinase domain containing                  |
| Kidney | ENSAMEG00000000342 | CYP2J2       | cytochrome P450 family 2 subfamily J member 2               |
| Kidney | ENSAMEG00000000405 | UNC13C       | unc-13 homolog C                                            |
| Kidney | ENSAMEG00000000519 | OSR2         | odd-skipped related transcription factor 2                  |
| Kidney | ENSAMEG00000000560 | ZMYND12      | zinc finger MYND-type containing 12                         |
| Kidney | ENSAMEG00000000609 | MATN2        | matrilin 2                                                  |
| Kidney | ENSAMEG00000000614 | GUCA2A       | guanylate cyclase activator 2A                              |
| Kidney | ENSAMEG00000000616 | GUCA2B       | guanylate cyclase activator 2B                              |
| Kidney | ENSAMEG00000000673 | HOXC10       | homeobox C10                                                |
| Kidney | ENSAMEG00000000678 | HOXC9        | homeobox C9                                                 |
| Kidney | ENSAMEG00000000683 | HOXC8        | homeobox C8                                                 |
| Kidney | ENSAMEG00000000686 | HOXC6        | homeobox C6                                                 |
| Kidney | ENSAMEG00000000691 | HOXC5        | homeobox C5                                                 |
| Kidney | ENSAMEG00000000693 | NPHS1        | NPHS1, nephrin                                              |
| Kidney | ENSAMEG00000000697 | HOXC4        | homeobox C4                                                 |
| Kidney | ENSAMEG00000000790 | SCUBE3       | signal peptide, CUB domain and EGF like domain containing 3 |
| Kidney | ENSAMEG00000000843 | MASP1        | mannan binding lectin serine peptidase 1                    |
| Kidney | ENSAMEG00000000867 | C1QL4        | complement C1q like 4                                       |
| Kidney | ENSAMEG00000000927 | REN          | renin                                                       |
| Kidney | ENSAMEG00000000942 | MLANA        | melan-A                                                     |
| Kidney | ENSAMEG00000000982 | GOLT1A       | golgi transport 1A                                          |
| Kidney | ENSAMEG00000000994 | KNG1         | kininogen 1                                                 |
| Kidney | ENSAMEG00000001013 | HRG          | histidine rich glycoprotein                                 |
| Kidney | ENSAMEG00000001033 | MTTP         | microsomal triglyceride transfer protein                    |
| Kidney | ENSAMEG00000001045 | C5           | complement C5                                               |
| Kidney | ENSAMEG00000001078 | LOC100467242 | double C2-like domain-containing protein gamma              |
| Kidney | ENSAMEG00000001087 | AQP6         | aquaporin 6                                                 |
| Kidney | ENSAMEG00000001285 | --           | --                                                          |
| Kidney | ENSAMEG00000001406 | CCDC160      | coiled-coil domain containing 160                           |
| Kidney | ENSAMEG00000001422 | HHLA2        | HERV-H LTR-associating 2                                    |
| Kidney | ENSAMEG00000001432 | GPC4         | glypican 4                                                  |
| Kidney | ENSAMEG00000001438 | --           | --                                                          |
| Kidney | ENSAMEG00000001461 | NLGN1        | neuroligin 1                                                |
| Kidney | ENSAMEG00000001516 | FOXI1        | forkhead box I1                                             |
| Kidney | ENSAMEG00000001556 | ADGRF1       | adhesion G protein-coupled receptor F1                      |
| Kidney | ENSAMEG00000001643 | SLC30A3      | solute carrier family 30 member 3                           |
| Kidney | ENSAMEG00000001683 | KRT7         | keratin 7                                                   |
| Kidney | ENSAMEG00000001809 | F2RL1        | F2R like trypsin receptor 1                                 |
| Kidney | ENSAMEG00000001828 | HOXD1        | homeobox D1                                                 |

|        |                    |              |                                                                     |
|--------|--------------------|--------------|---------------------------------------------------------------------|
| Kidney | ENSAMEG00000001830 | HOXD3        | homeobox D3                                                         |
| Kidney | ENSAMEG00000001837 | HOXD4        | homeobox D4                                                         |
| Kidney | ENSAMEG00000001838 | HOXD8        | homeobox D8                                                         |
| Kidney | ENSAMEG00000001843 | --           | --                                                                  |
| Kidney | ENSAMEG00000001849 | HOXD10       | homeobox D10                                                        |
| Kidney | ENSAMEG00000001856 | HOXD11       | homeobox D11                                                        |
| Kidney | ENSAMEG00000001883 | CER1         | cerberus 1, DAN family BMP antagonist                               |
| Kidney | ENSAMEG00000001889 | FREM1        | FRAS1 related extracellular matrix 1                                |
| Kidney | ENSAMEG00000001894 | SLC12A1      | solute carrier family 12 member 1                                   |
| Kidney | ENSAMEG00000001973 | USP43        | ubiquitin specific peptidase 43                                     |
| Kidney | ENSAMEG00000001989 | TMPRSS3      | transmembrane serine protease 3                                     |
| Kidney | ENSAMEG00000002088 | DCDC2        | doublecortin domain containing 2                                    |
| Kidney | ENSAMEG00000002100 | LONRF3       | LON peptidase N-terminal domain and ring finger 3                   |
| Kidney | ENSAMEG00000002115 | AMDHD1       | amidohydrolase domain containing 1                                  |
| Kidney | ENSAMEG00000002202 | CLDN19       | claudin 19                                                          |
| Kidney | ENSAMEG00000002230 | SLC35F2      | solute carrier family 35 member F2                                  |
| Kidney | ENSAMEG00000002328 | CA12         | carbonic anhydrase 12                                               |
| Kidney | ENSAMEG00000002371 | RALYL        | RALY RNA binding protein like                                       |
| Kidney | ENSAMEG00000002423 | CCDC198      | coiled-coil domain containing 198                                   |
| Kidney | ENSAMEG00000002538 | SLC23A3      | solute carrier family 23 member 3                                   |
| Kidney | ENSAMEG00000002558 | TFAP2A       | transcription factor AP-2 alpha                                     |
| Kidney | ENSAMEG00000002567 | CA2          | carbonic anhydrase 2                                                |
| Kidney | ENSAMEG00000002582 | RYR2         | ryanodine receptor 2                                                |
| Kidney | ENSAMEG00000002620 | ATP6V0D2     | ATPase H <sup>+</sup> transporting V0 subunit d2                    |
| Kidney | ENSAMEG00000002691 | ELOVL2       | ELOVL fatty acid elongase 2                                         |
| Kidney | ENSAMEG00000002751 | RIPPLY1      | rippy transcriptional repressor 1                                   |
| Kidney | ENSAMEG00000002772 | SLC51B       | solute carrier family 51 beta subunit                               |
| Kidney | ENSAMEG00000002832 | SLC16A2      | solute carrier family 16 member 2                                   |
| Kidney | ENSAMEG00000002869 | UCP1         | uncoupling protein 1                                                |
| Kidney | ENSAMEG00000002890 | MIOX         | myo-inositol oxygenase                                              |
| Kidney | ENSAMEG00000002970 | LOC100478661 | ras-associated and pleckstrin homology domains-containing protein 1 |
| Kidney | ENSAMEG00000002977 | MAPK4        | mitogen-activated protein kinase 4                                  |
| Kidney | ENSAMEG00000002998 | VIL1         | villin 1                                                            |
| Kidney | ENSAMEG00000003069 | NDNF         | neuron derived neurotrophic factor                                  |
| Kidney | ENSAMEG00000003156 | SPP1         | secreted phosphoprotein 1                                           |
| Kidney | ENSAMEG00000003181 | USH1C        | USH1 protein network component harmonin                             |
| Kidney | ENSAMEG00000003324 | TTC23L       | tetratricopeptide repeat domain 23 like                             |
| Kidney | ENSAMEG00000003417 | TNNT1        | troponin T1, slow skeletal type                                     |
| Kidney | ENSAMEG00000003459 | DMTN         | dematin actin binding protein                                       |
| Kidney | ENSAMEG00000003513 | RAB15        | RAB15, member RAS oncogene family                                   |
| Kidney | ENSAMEG00000003602 | RAB3C        | RAB3C, member RAS oncogene family                                   |
| Kidney | ENSAMEG00000003646 | RTKN2        | rhotekin 2                                                          |

|        |                    |              |                                                                 |
|--------|--------------------|--------------|-----------------------------------------------------------------|
| Kidney | ENSAMEG00000003734 | FXVD2        | FXVD domain containing ion transport regulator 2                |
| Kidney | ENSAMEG00000003870 | TMEM52B      | transmembrane protein 52B                                       |
| Kidney | ENSAMEG00000003893 | ADGRG7       | adhesion G protein-coupled receptor G7                          |
| Kidney | ENSAMEG00000003930 | TMIGD1       | transmembrane and immunoglobulin domain containing 1            |
| Kidney | ENSAMEG00000004034 | --           | --                                                              |
| Kidney | ENSAMEG00000004040 | MUC20        | mucin 20, cell surface associated                               |
| Kidney | ENSAMEG00000004095 | STAC2        | SH3 and cysteine rich domain 2                                  |
| Kidney | ENSAMEG00000004261 | LOC109489886 | multidrug and toxin extrusion protein 2                         |
| Kidney | ENSAMEG00000004329 | ABCC11       | ATP binding cassette subfamily C member 11                      |
| Kidney | ENSAMEG00000004335 | SLC47A2      | solute carrier family 47 member 2                               |
| Kidney | ENSAMEG00000004350 | SLC5A12      | solute carrier family 5 member 12                               |
| Kidney | ENSAMEG00000004372 | OVCH2        | ovochoymase 2 (gene/pseudogene)                                 |
| Kidney | ENSAMEG00000004389 | ALDH3A1      | aldehyde dehydrogenase 3 family member A1                       |
| Kidney | ENSAMEG00000004466 | SLC13A1      | solute carrier family 13 member 1                               |
| Kidney | ENSAMEG00000004515 | MUC15        | mucin 15, cell surface associated                               |
| Kidney | ENSAMEG00000004560 | TMC4         | transmembrane channel like 4                                    |
| Kidney | ENSAMEG00000004566 | SLC5A10      | solute carrier family 5 member 10                               |
| Kidney | ENSAMEG00000004574 | EFCAB12      | EF-hand calcium binding domain 12                               |
| Kidney | ENSAMEG00000004582 | CNDP1        | carosine dipeptidase 1                                          |
| Kidney | ENSAMEG00000004593 | LYPD6B       | LY6/PLAUR domain containing 6B                                  |
| Kidney | ENSAMEG00000004675 | SHMT1        | serine hydroxymethyltransferase 1                               |
| Kidney | ENSAMEG00000004767 | HGD          | homogentisate 1,2-dioxygenase                                   |
| Kidney | ENSAMEG00000004778 | LOC100474931 | C-type lectin domain family 18 member A                         |
| Kidney | ENSAMEG00000004783 | SYPL2        | synaptophysin like 2                                            |
| Kidney | ENSAMEG00000004937 | ANGPTL4      | angiopoietin like 4                                             |
| Kidney | ENSAMEG00000004949 | SLC13A2      | solute carrier family 13 member 2                               |
| Kidney | ENSAMEG00000004971 | HOXB6        | homeobox B6                                                     |
| Kidney | ENSAMEG00000004977 | HOXB7        | homeobox B7                                                     |
| Kidney | ENSAMEG00000004982 | HOXB8        | homeobox B8                                                     |
| Kidney | ENSAMEG00000004990 | HOXB9        | homeobox B9                                                     |
| Kidney | ENSAMEG00000005003 | CXCL17       | C-X-C motif chemokine ligand 17                                 |
| Kidney | ENSAMEG00000005030 | SPOCK3       | SPARC (osteonectin), cwcv and kazal like domains proteoglycan 3 |
| Kidney | ENSAMEG00000005157 | SCG5         | secretogranin V                                                 |
| Kidney | ENSAMEG00000005199 | PRKG2        | protein kinase, cGMP-dependent, type II                         |
| Kidney | ENSAMEG00000005229 | SLC6A17      | solute carrier family 6 member 17                               |
| Kidney | ENSAMEG00000005259 | FOLH1        | folate hydrolase 1                                              |
| Kidney | ENSAMEG00000005284 | TFCP2L1      | transcription factor CP2 like 1                                 |
| Kidney | ENSAMEG00000005463 | FRAS1        | Fraser extracellular matrix complex subunit 1                   |
| Kidney | ENSAMEG00000005554 | LRRC19       | leucine rich repeat containing 19                               |
| Kidney | ENSAMEG00000005588 | SIM2         | single-minded family bHLH transcription factor 2                |
| Kidney | ENSAMEG00000005615 | --           | --                                                              |
| Kidney | ENSAMEG00000005696 | BHMT         | betaine--homocysteine S-methyltransferase                       |



|        |                    |         |                                                                                 |
|--------|--------------------|---------|---------------------------------------------------------------------------------|
| Kidney | ENSAMEG00000005823 | GPRC6A  | G protein-coupled receptor class C group 6 member A                             |
| Kidney | ENSAMEG00000005833 | CITED1  | Cbp/p300 interacting transactivator with Glu/Asp rich carboxy-terminal domain 1 |
| Kidney | ENSAMEG00000005872 | EVX1    | even-skipped homeobox 1                                                         |
| Kidney | ENSAMEG00000005879 | HOXA11  | homeobox A11                                                                    |
| Kidney | ENSAMEG00000005883 | HOXA10  | homeobox A10                                                                    |
| Kidney | ENSAMEG00000005884 | GADL1   | glutamate decarboxylase like 1                                                  |
| Kidney | ENSAMEG00000005885 | HOXA9   | homeobox A9                                                                     |
| Kidney | ENSAMEG00000005889 | SLC3A1  | solute carrier family 3 member 1                                                |
| Kidney | ENSAMEG00000005891 | HOXA7   | homeobox A7                                                                     |
| Kidney | ENSAMEG00000005892 | HOXA6   | homeobox A6                                                                     |
| Kidney | ENSAMEG00000005900 | TRPV4   | transient receptor potential cation channel subfamily V member 4                |
| Kidney | ENSAMEG00000005926 | BMPR1B  | bone morphogenetic protein receptor type 1B                                     |
| Kidney | ENSAMEG00000005964 | CDH6    | cadherin 6                                                                      |
| Kidney | ENSAMEG00000005972 | SLC4A4  | solute carrier family 4 member 4                                                |
| Kidney | ENSAMEG00000005988 | CRYM    | crystallin mu                                                                   |
| Kidney | ENSAMEG00000005991 | SLC22A8 | solute carrier family 22 member 8                                               |
| Kidney | ENSAMEG00000006012 | SLC22A6 | solute carrier family 22 member 6                                               |
| Kidney | ENSAMEG00000006080 | GC      | GC, vitamin D binding protein                                                   |
| Kidney | ENSAMEG00000006222 | ACSM3   | acyl-CoA synthetase medium chain family member 3                                |
| Kidney | ENSAMEG00000006310 | KCNK12  | potassium two pore domain channel subfamily K member 12                         |
| Kidney | ENSAMEG00000006404 | PAH     | phenylalanine hydroxylase                                                       |
| Kidney | ENSAMEG00000006408 | CFAP100 | cilia and flagella associated protein 100                                       |
| Kidney | ENSAMEG00000006446 | SULT1C2 | sulfotransferase family 1C member 2                                             |
| Kidney | ENSAMEG00000006457 | NECAB2  | N-terminal EF-hand calcium binding protein 2                                    |
| Kidney | ENSAMEG00000006473 | TRPV5   | transient receptor potential cation channel subfamily V member 5                |
| Kidney | ENSAMEG00000006494 | GBA3    | glucosylceramidase beta 3 (gene/pseudogene)                                     |
| Kidney | ENSAMEG00000006694 | PNPLA3  | patatin like phospholipase domain containing 3                                  |
| Kidney | ENSAMEG00000006743 | AQP1    | aquaporin 1 (Colton blood group)                                                |
| Kidney | ENSAMEG00000006807 | --      | --                                                                              |
| Kidney | ENSAMEG00000006995 | SLC26A7 | solute carrier family 26 member 7                                               |
| Kidney | ENSAMEG00000007018 | ABCC2   | ATP binding cassette subfamily C member 2                                       |
| Kidney | ENSAMEG00000007057 | TMEM174 | transmembrane protein 174                                                       |
| Kidney | ENSAMEG00000007062 | TMEM171 | transmembrane protein 171                                                       |
| Kidney | ENSAMEG00000007091 | CDHR2   | cadherin related family member 2                                                |
| Kidney | ENSAMEG00000007125 | PRR35   | proline rich 35                                                                 |
| Kidney | ENSAMEG00000007150 | --      | --                                                                              |
| Kidney | ENSAMEG00000007238 | SMTNL2  | smoothelin like 2                                                               |
| Kidney | ENSAMEG00000007244 | GGT6    | gamma-glutamyltransferase 6                                                     |
| Kidney | ENSAMEG00000007288 | A3GALT2 | alpha 1,3-galactosyltransferase 2                                               |

|        |                    |              |                                                            |
|--------|--------------------|--------------|------------------------------------------------------------|
| Kidney | ENSAMEG00000007361 | OSBP2        | oxysterol binding protein 2                                |
| Kidney | ENSAMEG00000007593 | --           | --                                                         |
| Kidney | ENSAMEG00000007809 | SERPINF1     | serpin family F member 1                                   |
| Kidney | ENSAMEG00000007857 | SERPINF2     | serpin family F member 2                                   |
| Kidney | ENSAMEG00000007874 | --           | --                                                         |
| Kidney | ENSAMEG00000008083 | TMEM252      | transmembrane protein 252                                  |
| Kidney | ENSAMEG00000008196 | CA4          | carbonic anhydrase 4                                       |
| Kidney | ENSAMEG00000008282 | ITIH1        | inter-alpha-trypsin inhibitor heavy chain 1                |
| Kidney | ENSAMEG00000008305 | LHX1         | LIM homeobox 1                                             |
| Kidney | ENSAMEG00000008369 | ENPP6        | ectonucleotide pyrophosphatase/phosphodiesterase 6         |
| Kidney | ENSAMEG00000008457 | --           | --                                                         |
| Kidney | ENSAMEG00000008518 | SCTR         | secretin receptor                                          |
| Kidney | ENSAMEG00000008599 | PKHD1        | PKHD1 ciliary IPT domain containing fibrocystin/polyductin |
| Kidney | ENSAMEG00000008667 | --           | --                                                         |
| Kidney | ENSAMEG00000008675 | --           | --                                                         |
| Kidney | ENSAMEG00000008680 | TFAP2B       | transcription factor AP-2 beta                             |
| Kidney | ENSAMEG00000008758 | --           | --                                                         |
| Kidney | ENSAMEG00000008769 | ASB5         | ankyrin repeat and SOCS box containing 5                   |
| Kidney | ENSAMEG00000008786 | DUSP9        | dual specificity phosphatase 9                             |
| Kidney | ENSAMEG00000008863 | ACSM2B       | acyl-CoA synthetase medium chain family member 2B          |
| Kidney | ENSAMEG00000008967 | UMOD         | uromodulin                                                 |
| Kidney | ENSAMEG00000008984 | GP2          | glycoprotein 2                                             |
| Kidney | ENSAMEG00000009006 | STK31        | serine/threonine kinase 31                                 |
| Kidney | ENSAMEG00000009066 | ASPA         | aspartoacylase                                             |
| Kidney | ENSAMEG00000009123 | STRA6        | stimulated by retinoic acid 6                              |
| Kidney | ENSAMEG00000009140 | RAB3B        | RAB3B, member RAS oncogene family                          |
| Kidney | ENSAMEG00000009252 | --           | --                                                         |
| Kidney | ENSAMEG00000009338 | KL           | klotho                                                     |
| Kidney | ENSAMEG00000009432 | BSND         | barttin CLCNK type accessory beta subunit                  |
| Kidney | ENSAMEG00000009440 | LOC100472452 | cytochrome P450 2D15                                       |
| Kidney | ENSAMEG00000009520 | --           | --                                                         |
| Kidney | ENSAMEG00000009527 | CA9          | carbonic anhydrase 9                                       |
| Kidney | ENSAMEG00000009531 | MCCD1        | mitochondrial coiled-coil domain 1                         |
| Kidney | ENSAMEG00000009559 | ALKAL2       | ALK and LTK ligand 2                                       |
| Kidney | ENSAMEG00000009588 | --           | --                                                         |
| Kidney | ENSAMEG00000009612 | CLEC3A       | C-type lectin domain family 3 member A                     |
| Kidney | ENSAMEG00000009628 | VAT1L        | vesicle amine transport 1 like                             |
| Kidney | ENSAMEG00000009638 | TPD52L1      | tumor protein D52 like 1                                   |
| Kidney | ENSAMEG00000009675 | FBXO2        | F-box protein 2                                            |
| Kidney | ENSAMEG00000009712 | FBXO44       | F-box protein 44                                           |
| Kidney | ENSAMEG00000009729 | MAL          | mal, T cell differentiation protein                        |
| Kidney | ENSAMEG00000009798 | PROM2        | prominin 2                                                 |
| Kidney | ENSAMEG00000009826 | SCIN         | scinderin                                                  |

|        |                    |          |                                                                           |
|--------|--------------------|----------|---------------------------------------------------------------------------|
| Kidney | ENSAMEG00000009840 | CDKL1    | cyclin dependent kinase like 1                                            |
| Kidney | ENSAMEG00000009861 | SLC17A3  | solute carrier family 17 member 3                                         |
| Kidney | ENSAMEG00000009915 | SLC17A1  | solute carrier family 17 member 1                                         |
| Kidney | ENSAMEG00000009948 | SLC17A4  | solute carrier family 17 member 4                                         |
| Kidney | ENSAMEG00000010023 | MAP7     | microtubule associated protein 7                                          |
| Kidney | ENSAMEG00000010068 | MMP7     | matrix metalloproteinase 7                                                |
| Kidney | ENSAMEG00000010239 | ABCC4    | ATP binding cassette subfamily C member 4                                 |
| Kidney | ENSAMEG00000010289 | F7       | coagulation factor VII                                                    |
| Kidney | ENSAMEG00000010306 | DAPL1    | death associated protein like 1                                           |
| Kidney | ENSAMEG00000010356 | SLC6A19  | solute carrier family 6 member 19                                         |
| Kidney | ENSAMEG00000010360 | PTER     | phosphotriesterase related                                                |
| Kidney | ENSAMEG00000010366 | SLC30A2  | solute carrier family 30 member 2                                         |
| Kidney | ENSAMEG00000010368 | CUBN     | cubilin                                                                   |
| Kidney | ENSAMEG00000010388 | S100G    | S100 calcium binding protein G                                            |
| Kidney | ENSAMEG00000010403 | SLC6A18  | solute carrier family 6 member 18                                         |
| Kidney | ENSAMEG00000010567 | RGL3     | ral guanine nucleotide dissociation stimulator like 3                     |
| Kidney | ENSAMEG00000010585 | --       | --                                                                        |
| Kidney | ENSAMEG00000010632 | CDHR5    | cadherin related family member 5                                          |
| Kidney | ENSAMEG00000010654 | LRP2     | LDL receptor related protein 2                                            |
| Kidney | ENSAMEG00000010662 | PAX8     | paired box 8                                                              |
| Kidney | ENSAMEG00000010682 | RERGL    | RERG like                                                                 |
| Kidney | ENSAMEG00000010732 | ARSG     | arylsulfatase G                                                           |
| Kidney | ENSAMEG00000010737 | KCNMB2   | potassium calcium-activated channel subfamily M regulatory beta subunit 2 |
| Kidney | ENSAMEG00000010744 | C11orf86 | chromosome 11 open reading frame 86                                       |
| Kidney | ENSAMEG00000010825 | SPTBN2   | spectrin beta, non-erythrocytic 2                                         |
| Kidney | ENSAMEG00000010847 | JAKMIP3  | Janus kinase and microtubule interacting protein 3                        |
| Kidney | ENSAMEG00000010945 | FGF9     | fibroblast growth factor 9                                                |
| Kidney | ENSAMEG00000011056 | CRB2     | crumbs 2, cell polarity complex component                                 |
| Kidney | ENSAMEG00000011064 | OCA2     | OCA2 melanosomal transmembrane protein                                    |
| Kidney | ENSAMEG00000011075 | AVP      | arginine vasopressin                                                      |
| Kidney | ENSAMEG00000011090 | SLC4A9   | solute carrier family 4 member 9                                          |
| Kidney | ENSAMEG00000011139 | TRIM50   | tripartite motif containing 50                                            |
| Kidney | ENSAMEG00000011167 | DEGS2    | delta 4-desaturase, sphingolipid 2                                        |
| Kidney | ENSAMEG00000011200 | PSD2     | pleckstrin and Sec7 domain containing 2                                   |
| Kidney | ENSAMEG00000011284 | DEFB129  | defensin beta 129                                                         |
| Kidney | ENSAMEG00000011508 | CCK      | cholecystokinin                                                           |
| Kidney | ENSAMEG00000011529 | CLDN16   | claudin 16                                                                |
| Kidney | ENSAMEG00000011558 | C3orf18  | chromosome 3 open reading frame 18                                        |
| Kidney | ENSAMEG00000011588 | ERICH4   | glutamate rich 4                                                          |
| Kidney | ENSAMEG00000011729 | FAM131C  | family with sequence similarity 131 member C                              |
| Kidney | ENSAMEG00000011751 | WDR72    | WD repeat domain 72                                                       |
| Kidney | ENSAMEG00000011842 | APOH     | apolipoprotein H                                                          |

|        |                    |              |                                                  |
|--------|--------------------|--------------|--------------------------------------------------|
| Kidney | ENSAMEG00000011859 | ARFGEF3      | ARFGEF family member 3                           |
| Kidney | ENSAMEG00000011870 | SLC38A3      | solute carrier family 38 member 3                |
| Kidney | ENSAMEG00000011881 | AGMAT        | agmatinase                                       |
| Kidney | ENSAMEG00000011913 | RIMS3        | regulating synaptic membrane exocytosis 3        |
| Kidney | ENSAMEG00000012066 | ACOX2        | acyl-CoA oxidase 2                               |
| Kidney | ENSAMEG00000012070 | SYT2         | synaptotagmin 2                                  |
| Kidney | ENSAMEG00000012077 | CLCN5        | chloride voltage-gated channel 5                 |
| Kidney | ENSAMEG00000012147 | LAD1         | ladinin 1                                        |
| Kidney | ENSAMEG00000012216 | LOC100468789 | sulfotransferase 1 family member D1              |
| Kidney | ENSAMEG00000012249 | SLC6A20      | solute carrier family 6 member 20                |
| Kidney | ENSAMEG00000012393 | MST1         | macrophage stimulating 1                         |
| Kidney | ENSAMEG00000012498 | TLDC2        | TBC/LysM-associated domain containing 2          |
| Kidney | ENSAMEG00000012504 | WFDC3        | WAP four-disulfide core domain 3                 |
| Kidney | ENSAMEG00000012586 | MYL3         | myosin light chain 3                             |
| Kidney | ENSAMEG00000012602 | PTH1R        | parathyroid hormone 1 receptor                   |
| Kidney | ENSAMEG00000012664 | LZTS1        | leucine zipper tumor suppressor 1                |
| Kidney | ENSAMEG00000012709 | --           | --                                               |
| Kidney | ENSAMEG00000012726 | DEFB1        | beta-defensin 103                                |
| Kidney | ENSAMEG00000012834 | KIF12        | kinesin family member 12                         |
| Kidney | ENSAMEG00000012842 | LOC100470802 | chondroitin sulfate proteoglycan 4               |
| Kidney | ENSAMEG00000012851 | AMBP         | alpha-1-microglobulin/bikunin precursor          |
| Kidney | ENSAMEG00000012934 | C19orf81     | chromosome 19 open reading frame 81              |
| Kidney | ENSAMEG00000012953 | --           | --                                               |
| Kidney | ENSAMEG00000012956 | SLC44A4      | solute carrier family 44 member 4                |
| Kidney | ENSAMEG00000013008 | SHISA3       | shisa family member 3                            |
| Kidney | ENSAMEG00000013063 | RHCG         | Rh family C glycoprotein                         |
| Kidney | ENSAMEG00000013086 | APOB         | apolipoprotein B                                 |
| Kidney | ENSAMEG00000013120 | ICA1L        | islet cell autoantigen 1 like                    |
| Kidney | ENSAMEG00000013125 | HNF1B        | HNF1 homeobox B                                  |
| Kidney | ENSAMEG00000013160 | IL1RL1       | interleukin 1 receptor like 1                    |
| Kidney | ENSAMEG00000013169 | CYP24A1      | cytochrome P450 family 24 subfamily A member 1   |
| Kidney | ENSAMEG00000013201 | SLC9A4       | solute carrier family 9 member A4                |
| Kidney | ENSAMEG00000013210 | SLC9A2       | solute carrier family 9 member A2                |
| Kidney | ENSAMEG00000013219 | PTPRQ        | protein tyrosine phosphatase, receptor type Q    |
| Kidney | ENSAMEG00000013223 | BCAS1        | breast carcinoma amplified sequence 1            |
| Kidney | ENSAMEG00000013224 | HS3ST5       | heparan sulfate-glucosamine 3-sulfotransferase 5 |
| Kidney | ENSAMEG00000013243 | NAPSA        | napsin A aspartic peptidase                      |
| Kidney | ENSAMEG00000013253 | POU3F3       | POU class 3 homeobox 3                           |
| Kidney | ENSAMEG00000013267 | --           | --                                               |
| Kidney | ENSAMEG00000013302 | MSI1         | musashi RNA binding protein 1                    |
| Kidney | ENSAMEG00000013326 | C8G          | complement C8 gamma chain                        |
| Kidney | ENSAMEG00000013342 | BICC1        | BicC family RNA binding protein 1                |
| Kidney | ENSAMEG00000013473 | CRYGN        | crystallin gamma N                               |

|        |                    |              |                                                                               |
|--------|--------------------|--------------|-------------------------------------------------------------------------------|
| Kidney | ENSAMEG00000013482 | --           | --                                                                            |
| Kidney | ENSAMEG00000013557 | SLC26A4      | solute carrier family 26 member 4                                             |
| Kidney | ENSAMEG00000013572 | P2RX2        | purinergic receptor P2X 2                                                     |
| Kidney | ENSAMEG00000013675 | GATA6        | GATA binding protein 6                                                        |
| Kidney | ENSAMEG00000013706 | VDR          | vitamin D receptor                                                            |
| Kidney | ENSAMEG00000013714 | --           | --                                                                            |
| Kidney | ENSAMEG00000013732 | KCNK5        | potassium two pore domain channel subfamily K member 5                        |
| Kidney | ENSAMEG00000013806 | LOC105241896 | receptor-type tyrosine-protein phosphatase delta                              |
| Kidney | ENSAMEG00000013814 | TSPAN1       | tetraspanin 1                                                                 |
| Kidney | ENSAMEG00000013822 | RBP4         | retinol binding protein 4                                                     |
| Kidney | ENSAMEG00000013996 | --           | --                                                                            |
| Kidney | ENSAMEG00000014004 | PNLIPRP2     | pancreatic lipase related protein 2 (gene/pseudogene)                         |
| Kidney | ENSAMEG00000014028 | RGS7         | regulator of G protein signaling 7                                            |
| Kidney | ENSAMEG00000014044 | SLC28A1      | solute carrier family 28 member 1                                             |
| Kidney | ENSAMEG00000014148 | EMX2         | empty spiracles homeobox 2                                                    |
| Kidney | ENSAMEG00000014170 | RBFOX3       | RNA binding fox-1 homolog 3                                                   |
| Kidney | ENSAMEG00000014182 | PAQR5        | progesterone and adipoQ receptor family member 5                              |
| Kidney | ENSAMEG00000014194 | SLC15A2      | solute carrier family 15 member 2                                             |
| Kidney | ENSAMEG00000014244 | SCRG1        | stimulator of chondrogenesis 1                                                |
| Kidney | ENSAMEG00000014275 | RAP1GAP      | RAP1 GTPase activating protein                                                |
| Kidney | ENSAMEG00000014276 | CASR         | calcium sensing receptor                                                      |
| Kidney | ENSAMEG00000014315 | --           | --                                                                            |
| Kidney | ENSAMEG00000014423 | KLK15        | kallikrein related peptidase 15                                               |
| Kidney | ENSAMEG00000014450 | KLK1         | kallikrein 1                                                                  |
| Kidney | ENSAMEG00000014562 | RHBG         | Rh family B glycoprotein (gene/pseudogene)                                    |
| Kidney | ENSAMEG00000014573 | UGT8         | UDP glycosyltransferase 8                                                     |
| Kidney | ENSAMEG00000014585 | ARID3C       | AT-rich interaction domain 3C                                                 |
| Kidney | ENSAMEG00000014597 | PLEKHG6      | pleckstrin homology and RhoGEF domain containing G6                           |
| Kidney | ENSAMEG00000014601 | ATP12A       | ATPase H <sup>+</sup> /K <sup>+</sup> transporting non-gastric alpha2 subunit |
| Kidney | ENSAMEG00000014698 | HSD17B14     | hydroxysteroid 17-beta dehydrogenase 14                                       |
| Kidney | ENSAMEG00000014701 | NPHS2        | NPHS2, podocin                                                                |
| Kidney | ENSAMEG00000014721 | LOC100473915 | insulin receptor-related protein-like                                         |
| Kidney | ENSAMEG00000014736 | TDRD5        | tudor domain containing 5                                                     |
| Kidney | ENSAMEG00000014737 | NTRK1        | neurotrophic receptor tyrosine kinase 1                                       |
| Kidney | ENSAMEG00000014765 | SIM1         | single-minded family bHLH transcription factor 1                              |
| Kidney | ENSAMEG00000014828 | TFR2         | transferrin receptor 2                                                        |
| Kidney | ENSAMEG00000014901 | CRABP2       | cellular retinoic acid binding protein 2                                      |
| Kidney | ENSAMEG00000014904 | CCL16        | C-C motif chemokine ligand 16                                                 |
| Kidney | ENSAMEG00000014944 | CALB1        | calbindin 1                                                                   |
| Kidney | ENSAMEG00000014957 | EGF          | epidermal growth factor                                                       |
| Kidney | ENSAMEG00000015034 | --           | --                                                                            |
| Kidney | ENSAMEG00000015045 | SLC22A2      | solute carrier family 22 member 2                                             |

|        |                    |              |                                                    |
|--------|--------------------|--------------|----------------------------------------------------|
| Kidney | ENSAMEG00000015079 | STAG3        | stromal antigen 3                                  |
| Kidney | ENSAMEG00000015089 | XPNPEP2      | X-prolyl aminopeptidase 2                          |
| Kidney | ENSAMEG00000015162 | WEE2         | Wee1-like protein kinase 2                         |
| Kidney | ENSAMEG00000015200 | --           | --                                                 |
| Kidney | ENSAMEG00000015230 | C6           | complement C6                                      |
| Kidney | ENSAMEG00000015302 | NRAP         | nebulin related anchoring protein                  |
| Kidney | ENSAMEG00000015305 | LOC100473415 | creatine kinase U-type, mitochondrial              |
| Kidney | ENSAMEG00000015349 | HABP2        | hyaluronan binding protein 2                       |
| Kidney | ENSAMEG00000015459 | SLC7A9       | solute carrier family 7 member 9                   |
| Kidney | ENSAMEG00000015503 | NKAIN3       | sodium/potassium transporting ATPase interacting 3 |
| Kidney | ENSAMEG00000015623 | EMX1         | empty spiracles homeobox 1                         |
| Kidney | ENSAMEG00000015644 | SERPINC1     | serpin family C member 1                           |
| Kidney | ENSAMEG00000015680 | CRP          | C-reactive protein                                 |
| Kidney | ENSAMEG00000015838 | CKMT2        | creatine kinase, mitochondrial 2                   |
| Kidney | ENSAMEG00000015860 | ANKRD53      | ankyrin repeat domain 53                           |
| Kidney | ENSAMEG00000015864 | ATP6V1B1     | ATPase H+ transporting V1 subunit B1               |
| Kidney | ENSAMEG00000016034 | --           | --                                                 |
| Kidney | ENSAMEG00000016164 | UGT1A1       | UDP glucuronosyltransferase family 1 member A1     |
| Kidney | ENSAMEG00000016218 | SLC5A2       | solute carrier family 5 member 2                   |
| Kidney | ENSAMEG00000016276 | AIF1L        | allograft inflammatory factor 1 like               |
| Kidney | ENSAMEG00000016281 | LAMC3        | laminin subunit gamma 3                            |
| Kidney | ENSAMEG00000016318 | WNT9A        | Wnt family member 9A                               |
| Kidney | ENSAMEG00000016382 | ASGR1        | asialoglycoprotein receptor 1                      |
| Kidney | ENSAMEG00000016389 | SLC34A3      | solute carrier family 34 member 3                  |
| Kidney | ENSAMEG00000016399 | SLC5A8       | solute carrier family 5 member 8                   |
| Kidney | ENSAMEG00000016427 | SLC10A2      | solute carrier family 10 member 2                  |
| Kidney | ENSAMEG00000016432 | CCKBR        | cholecystokinin B receptor                         |
| Kidney | ENSAMEG00000016453 | DAO          | D-amino acid oxidase                               |
| Kidney | ENSAMEG00000016507 | PCK2         | phosphoenolpyruvate carboxykinase 2, mitochondrial |
| Kidney | ENSAMEG00000016517 | NCAM1        | neural cell adhesion molecule 1                    |
| Kidney | ENSAMEG00000016643 | LMX1B        | LIM homeobox transcription factor 1 beta           |
| Kidney | ENSAMEG00000016731 | KIF1A        | kinesin family member 1A                           |
| Kidney | ENSAMEG00000016743 | SLC12A3      | solute carrier family 12 member 3                  |
| Kidney | ENSAMEG00000016756 | CPLX1        | complexin 1                                        |
| Kidney | ENSAMEG00000016843 | --           | --                                                 |
| Kidney | ENSAMEG00000016861 | LOC100470789 | receptor-type tyrosine-protein phosphatase delta   |
| Kidney | ENSAMEG00000016879 | INHHA        | inhibin alpha subunit                              |
| Kidney | ENSAMEG00000016904 | MSS51        | MSS51 mitochondrial translational activator        |
| Kidney | ENSAMEG00000016938 | FXYD4        | FXYD domain containing ion transport regulator 4   |
| Kidney | ENSAMEG00000017078 | SLC29A2      | solute carrier family 29 member 2                  |
| Kidney | ENSAMEG00000017080 | DAB2         | DAB2, clathrin adaptor protein                     |
| Kidney | ENSAMEG00000017081 | KLHDC7A      | kelch domain containing 7A                         |
| Kidney | ENSAMEG00000017136 | CDH16        | cadherin 16                                        |

|        |                    |          |                                                                  |
|--------|--------------------|----------|------------------------------------------------------------------|
| Kidney | ENSAMEG00000017191 | PAK6     | p21 (RAC1) activated kinase 6                                    |
| Kidney | ENSAMEG00000017262 | NDRG4    | NDRG family member 4                                             |
| Kidney | ENSAMEG00000017280 | MCOLN3   | mucolipin 3                                                      |
| Kidney | ENSAMEG00000017343 | OVOL1    | ovo like transcriptional repressor 1                             |
| Kidney | ENSAMEG00000017389 | HSD11B2  | hydroxysteroid 11-beta dehydrogenase 2                           |
| Kidney | ENSAMEG00000017426 | TINAG    | tubulointerstitial nephritis antigen                             |
| Kidney | ENSAMEG00000017498 | PDZK1    | PDZ domain containing 1                                          |
| Kidney | ENSAMEG00000017523 | PAX2     | paired box 2                                                     |
| Kidney | ENSAMEG00000017529 | F13B     | coagulation factor XIII B chain                                  |
| Kidney | ENSAMEG00000017648 | KCNIP2   | potassium voltage-gated channel interacting protein 2            |
| Kidney | ENSAMEG00000017736 | SLC22A13 | solute carrier family 22 member 13                               |
| Kidney | ENSAMEG00000017765 | PSD      | pleckstrin and Sec7 domain containing                            |
| Kidney | ENSAMEG00000017795 | HEPACAM2 | HEPACAM family member 2                                          |
| Kidney | ENSAMEG00000017802 | SPOCD1   | SPOC domain containing 1                                         |
| Kidney | ENSAMEG00000017846 | NODAL    | nodal growth differentiation factor                              |
| Kidney | ENSAMEG00000017878 | CNNM2    | cyclin and CBS domain divalent metal cation transport mediator 2 |
| Kidney | ENSAMEG00000017883 | SLC22A12 | solute carrier family 22 member 12                               |
| Kidney | ENSAMEG00000017952 | TMEM213  | transmembrane protein 213                                        |
| Kidney | ENSAMEG00000017954 | ATP6V0A4 | ATPase H+ transporting V0 subunit a4                             |
| Kidney | ENSAMEG00000017960 | NEURL1   | neuralized E3 ubiquitin protein ligase 1                         |
| Kidney | ENSAMEG00000018075 | PBLD     | phenazine biosynthesis like protein domain containing            |
| Kidney | ENSAMEG00000018105 | SLC34A2  | solute carrier family 34 member 2                                |
| Kidney | ENSAMEG00000018145 | SLC34A1  | solute carrier family 34 member 1                                |
| Kidney | ENSAMEG00000018174 | CYBA     | cytochrome b-245 alpha chain                                     |
| Kidney | ENSAMEG00000018206 | AMN      | amnion associated transmembrane protein                          |
| Kidney | ENSAMEG00000018209 | PAPLN    | papilin, proteoglycan like sulfated glycoprotein                 |
| Kidney | ENSAMEG00000018323 | VSTM2B   | V-set and transmembrane domain containing 2B                     |
| Kidney | ENSAMEG00000018346 | SLC4A1   | solute carrier family 4 member 1 (Diego blood group)             |
| Kidney | ENSAMEG00000018387 | DOK6     | docking protein 6                                                |
| Kidney | ENSAMEG00000018459 | FGB      | fibrinogen beta chain                                            |
| Kidney | ENSAMEG00000018460 | AVPR2    | arginine vasopressin receptor 2                                  |
| Kidney | ENSAMEG00000018551 | BEX3     | brain expressed X-linked 3                                       |
| Kidney | ENSAMEG00000018554 | TCEAL9   | transcription elongation factor A like 9                         |
| Kidney | ENSAMEG00000018642 | CLDN2    | claudin 2                                                        |
| Kidney | ENSAMEG00000018725 | KCNE1    | potassium voltage-gated channel subfamily E regulatory subunit 1 |
| Kidney | ENSAMEG00000018745 | PPP1R3C  | protein phosphatase 1 regulatory subunit 3C                      |
| Kidney | ENSAMEG00000018819 | C1orf210 | chromosome 1 open reading frame 210                              |
| Kidney | ENSAMEG00000018938 | --       | --                                                               |
| Kidney | ENSAMEG00000019112 | --       | --                                                               |
| Kidney | ENSAMEG00000019148 | KCNJ1    | potassium voltage-gated channel subfamily J member 1             |
| Kidney | ENSAMEG00000019203 | KCNJ10   | potassium voltage-gated channel subfamily J member 10            |

|        |                    |          |                                                        |
|--------|--------------------|----------|--------------------------------------------------------|
| Kidney | ENSAMEG00000019286 | NAT8     | N-acetyltransferase 8 (putative)                       |
| Kidney | ENSAMEG00000019456 | SSTR2    | somatostatin receptor 2                                |
| Kidney | ENSAMEG00000019474 | CALML3   | calmodulin like 3                                      |
| Kidney | ENSAMEG00000019502 | KCNJ16   | potassium voltage-gated channel subfamily J member 16  |
| Kidney | ENSAMEG00000019520 | C21orf62 | chromosome 21 open reading frame 62                    |
| Kidney | ENSAMEG00000019524 | RNF183   | ring finger protein 183                                |
| Kidney | ENSAMEG00000019546 | GJB1     | gap junction protein beta 1                            |
| Kidney | ENSAMEG00000019800 | NPY2R    | neuropeptide Y receptor Y2                             |
| Kidney | ENSAMEG00000019880 | LRRN2    | leucine rich repeat neuronal 2                         |
| Kidney | ENSAMEG00000019892 | THRSP    | thyroid hormone responsive                             |
| Kidney | ENSAMEG00000019949 | CLDN8    | claudin 8                                              |
| Kidney | Novel00005         | --       | --                                                     |
| Kidney | Novel00025         | --       | hypothetical protein EGM_19048, partial                |
| Kidney | Novel00059         | --       | --                                                     |
| Kidney | Novel00061         | --       | --                                                     |
| Kidney | Novel00108         | --       | --                                                     |
| Kidney | Novel00111         | --       | --                                                     |
| Kidney | Novel00182         | --       | --                                                     |
| Kidney | Novel00235         | --       | --                                                     |
| Kidney | Novel00292         | --       | PREDICTED: small lysine-rich protein 1                 |
| Kidney | Novel00315         | --       | --                                                     |
| Kidney | Novel00316         | --       | PREDICTED: uncharacterized protein LOC105740805        |
| Kidney | Novel00348         | --       | --                                                     |
| Kidney | Novel00349         | --       | --                                                     |
| Kidney | Novel00355         | --       | --                                                     |
| Kidney | Novel00412         | --       | PREDICTED: paired box protein Pax-2                    |
| Kidney | Novel00417         | --       | PREDICTED: Kv channel-interacting protein 2 isoform X7 |
| Kidney | Novel00420         | --       | --                                                     |
| Kidney | Novel00435         | --       | --                                                     |
| Kidney | Novel00438         | --       | PREDICTED: proline-rich protein 25                     |
| Kidney | Novel00471         | --       | --                                                     |
| Kidney | Novel00547         | --       | --                                                     |
| Kidney | Novel00549         | --       | --                                                     |
| Kidney | Novel00596         | --       | --                                                     |
| Kidney | Novel00615         | --       | --                                                     |
| Kidney | Novel00629         | --       | --                                                     |
| Kidney | Novel00634         | --       | --                                                     |
| Kidney | Novel00639         | --       | PREDICTED: V-type proton ATPase subunit G 3            |
| Kidney | Novel00651         | --       | --                                                     |
| Kidney | Novel00656         | --       | --                                                     |
| Kidney | Novel00660         | --       | PREDICTED: LOW QUALITY PROTEIN: papilin                |
| Kidney | Novel00708         | --       | --                                                     |
| Kidney | Novel00709         | --       | --                                                     |



|        |            |    |                                                                      |
|--------|------------|----|----------------------------------------------------------------------|
| Kidney | Novel00743 | -- | PREDICTED: homeobox protein EMX1                                     |
| Kidney | Novel00832 | -- | tetratricopeptide repeat protein 39B-like protein, partial           |
| Kidney | Novel00849 | -- | --                                                                   |
| Kidney | Novel00877 | -- | PREDICTED: neuronal calcium sensor 1                                 |
| Kidney | Novel00900 | -- | --                                                                   |
| Kidney | Novel00915 | -- | --                                                                   |
| Kidney | Novel00923 | -- | --                                                                   |
| Kidney | Novel00925 | -- | --                                                                   |
| Kidney | Novel00938 | -- | --                                                                   |
| Kidney | Novel00988 | -- | --                                                                   |
| Kidney | Novel01021 | -- | --                                                                   |
| Kidney | Novel01039 | -- | --                                                                   |
| Kidney | Novel01084 | -- | --                                                                   |
| Kidney | Novel01118 | -- | --                                                                   |
| Kidney | Novel01171 | -- | --                                                                   |
| Kidney | Novel01210 | -- | PREDICTED: low-density lipoprotein receptor-related protein 2        |
| Kidney | Novel01211 | -- | --                                                                   |
| Kidney | Novel01229 | -- | PREDICTED: 60S ribosomal protein L19-like                            |
| Kidney | Novel01239 | -- | --                                                                   |
| Kidney | Novel01240 | -- | --                                                                   |
| Kidney | Novel01243 | -- | --                                                                   |
| Kidney | Novel01247 | -- | --                                                                   |
| Kidney | Novel01255 | -- | PREDICTED: solute carrier family 22 member 11                        |
| Kidney | Novel01265 | -- | PREDICTED: tenascin-N-like                                           |
| Kidney | Novel01276 | -- | PREDICTED: homeobox protein Hox-D4a-like                             |
| Kidney | Novel01335 | -- | PREDICTED: uncharacterized protein LOC105236658                      |
| Kidney | Novel01339 | -- | PREDICTED: uncharacterized protein LOC103789652                      |
| Kidney | Novel01399 | -- | --                                                                   |
| Kidney | Novel01450 | -- | --                                                                   |
| Kidney | Novel01458 | -- | hypothetical protein EGM_19048, partial                              |
| Kidney | Novel01477 | -- | --                                                                   |
| Kidney | Novel01478 | -- | --                                                                   |
| Kidney | Novel01515 | -- | PREDICTED: EF-hand and coiled-coil domain-containing protein 1       |
| Kidney | Novel01519 | -- | --                                                                   |
| Kidney | Novel01578 | -- | PREDICTED: LOW QUALITY PROTEIN: uncharacterized protein LOC101564817 |
| Kidney | Novel01677 | -- | hypothetical protein PANDA_006701                                    |
| Kidney | Novel01680 | -- | PREDICTED: uncharacterized protein LOC104867008                      |
| Kidney | Novel01703 | -- | PREDICTED: cAMP-specific 3',5'-cyclic phosphodiesterase 4D-like      |
| Kidney | Novel01712 | -- | PREDICTED: killer cell lectin-like receptor 2                        |

|        |            |    |                                                             |
|--------|------------|----|-------------------------------------------------------------|
| Kidney | Novel01793 | -- | --                                                          |
| Kidney | Novel01801 | -- | --                                                          |
| Kidney | Novel01872 | -- | --                                                          |
| Kidney | Novel01875 | -- | --                                                          |
| Kidney | Novel01884 | -- | --                                                          |
| Kidney | Novel01887 | -- | --                                                          |
| Kidney | Novel01913 | -- | --                                                          |
| Kidney | Novel01928 | -- | --                                                          |
| Kidney | Novel02073 | -- | --                                                          |
| Kidney | Novel02134 | -- | PREDICTED: LOW QUALITY PROTEIN: thiamine transporter 2-like |
| Kidney | Novel02140 | -- | --                                                          |
| Kidney | Novel02174 | -- | --                                                          |
| Kidney | Novel02186 | -- | --                                                          |
| Kidney | Novel02190 | -- | PREDICTED: uncharacterized protein LOC102148341             |
| Kidney | Novel02218 | -- | --                                                          |
| Kidney | Novel02224 | -- | hypothetical protein BRAFLDRAFT_124569                      |
| Kidney | Novel02276 | -- | --                                                          |
| Kidney | Novel02312 | -- | --                                                          |
| Kidney | Novel02329 | -- | hypothetical protein PANDA_009295, partial                  |
| Kidney | Novel02362 | -- | --                                                          |
| Kidney | Novel02365 | -- | --                                                          |
| Kidney | Novel02373 | -- | --                                                          |
| Kidney | Novel02374 | -- | --                                                          |
| Kidney | Novel02381 | -- | --                                                          |
| Kidney | Novel02396 | -- | --                                                          |
| Kidney | Novel02419 | -- | --                                                          |
| Kidney | Novel02420 | -- | PREDICTED: uncharacterized protein LOC105938209             |
| Kidney | Novel02446 | -- | PREDICTED: glutathione reductase, mitochondrial             |
| Kidney | Novel02510 | -- | --                                                          |
| Kidney | Novel02531 | -- | PREDICTED: killer cell lectin-like receptor 2               |
| Kidney | Novel02606 | -- | --                                                          |
| Kidney | Novel02617 | -- | PREDICTED: cystin-1                                         |
| Kidney | Novel02657 | -- | putative p150                                               |
| Kidney | Novel02727 | -- | --                                                          |
| Kidney | Novel02733 | -- | Retrovirus-related Pol polyprotein LINE-1                   |
| Kidney | Novel02855 | -- | --                                                          |
| Kidney | Novel02912 | -- | --                                                          |
| Kidney | Novel03014 | -- | --                                                          |
| Kidney | Novel03041 | -- | --                                                          |
| Kidney | Novel03059 | -- | --                                                          |
| Kidney | Novel03146 | -- | PREDICTED: uncharacterized protein LOC103092605             |
| Kidney | Novel03150 | -- | PREDICTED: uncharacterized protein LOC103693446             |

|        |            |    |                                                                                                   |
|--------|------------|----|---------------------------------------------------------------------------------------------------|
| Kidney | Novel03168 | -- | --                                                                                                |
| Kidney | Novel03175 | -- | --                                                                                                |
| Kidney | Novel03176 | -- | --                                                                                                |
| Kidney | Novel03184 | -- | --                                                                                                |
| Kidney | Novel03187 | -- | --                                                                                                |
| Kidney | Novel03188 | -- | PREDICTED: plasmolipin                                                                            |
| Kidney | Novel03215 | -- | --                                                                                                |
| Kidney | Novel03217 | -- | --                                                                                                |
| Kidney | Novel03235 | -- | --                                                                                                |
| Kidney | Novel03278 | -- | --                                                                                                |
| Kidney | Novel03313 | -- | --                                                                                                |
| Kidney | Novel03408 | -- | hypothetical protein                                                                              |
| Kidney | Novel03520 | -- | --                                                                                                |
| Kidney | Novel03572 | -- | --                                                                                                |
| Kidney | Novel03587 | -- | --                                                                                                |
| Kidney | Novel03588 | -- | --                                                                                                |
| Kidney | Novel03598 | -- | --                                                                                                |
| Kidney | Novel03621 | -- | PREDICTED: uncharacterized protein LOC105498491 isoform X2                                        |
| Kidney | Novel03622 | -- | --                                                                                                |
| Kidney | Novel03665 | -- | --                                                                                                |
| Kidney | Novel03696 | -- | --                                                                                                |
| Kidney | Novel03730 | -- | --                                                                                                |
| Kidney | Novel03739 | -- | PREDICTED: C2 calcium-dependent domain-containing protein 4B                                      |
| Kidney | Novel03742 | -- | --                                                                                                |
| Kidney | Novel03748 | -- | 60S ribosomal protein L32-like protein                                                            |
| Kidney | Novel03824 | -- | --                                                                                                |
| Kidney | Novel03825 | -- | --                                                                                                |
| Kidney | Novel03842 | -- | --                                                                                                |
| Kidney | Novel03873 | -- | --                                                                                                |
| Kidney | Novel03881 | -- | --                                                                                                |
| Kidney | Novel03885 | -- | --                                                                                                |
| Kidney | Novel03895 | -- | --                                                                                                |
| Kidney | Novel03918 | -- | --                                                                                                |
| Kidney | Novel03926 | -- | --                                                                                                |
| Kidney | Novel04030 | -- | unnamed protein product                                                                           |
| Kidney | Novel04050 | -- | PREDICTED:<br>CMP-N-acetylneuraminate-beta-galactosamide-alpha-2,3-sialyltransferase 4 isoform X1 |
| Kidney | Novel04114 | -- | --                                                                                                |
| Kidney | Novel04142 | -- | --                                                                                                |
| Kidney | Novel04149 | -- | --                                                                                                |

|        |            |    |                                                                               |
|--------|------------|----|-------------------------------------------------------------------------------|
| Kidney | Novel04155 | -- | --                                                                            |
| Kidney | Novel04156 | -- | --                                                                            |
| Kidney | Novel04225 | -- | --                                                                            |
| Kidney | Novel04242 | -- | --                                                                            |
| Kidney | Novel04248 | -- | --                                                                            |
| Kidney | Novel04274 | -- | PREDICTED: folate receptor alpha-like                                         |
| Kidney | Novel04302 | -- | PREDICTED: LOW QUALITY PROTEIN: homeobox protein HMX3, partial                |
| Kidney | Novel04328 | -- | --                                                                            |
| Kidney | Novel04348 | -- | Retrovirus-related Pol polyprotein LINE-1                                     |
| Kidney | Novel04404 | -- | --                                                                            |
| Kidney | Novel04423 | -- | PREDICTED: zinc finger X-linked protein ZXDA/ZXDB-like                        |
| Kidney | Novel04434 | -- | hypothetical protein M91_01570                                                |
| Kidney | Novel04437 | -- | --                                                                            |
| Kidney | Novel04474 | -- | hypothetical protein M91_16983, partial                                       |
| Kidney | Novel04476 | -- | hypothetical protein M91_11778                                                |
| Kidney | Novel04543 | -- | --                                                                            |
| Kidney | Novel04556 | -- | PREDICTED: formin-like protein 5                                              |
| Kidney | Novel04562 | -- | PREDICTED: leucine-rich repeat-containing protein C10orf11 homolog isoform X4 |
| Kidney | Novel04568 | -- | --                                                                            |
| Kidney | Novel04597 | -- | --                                                                            |
| Kidney | Novel04623 | -- | --                                                                            |
| Kidney | Novel04629 | -- | --                                                                            |
| Kidney | Novel04679 | -- | --                                                                            |
| Kidney | Novel04705 | -- | unnamed protein product                                                       |
| Kidney | Novel04732 | -- | hypothetical protein M91_17934                                                |
| Kidney | Novel04735 | -- | --                                                                            |
| Kidney | Novel04775 | -- | --                                                                            |
| Kidney | Novel04780 | -- | --                                                                            |
| Kidney | Novel04785 | -- | PREDICTED: surfactant-associated protein 2                                    |
| Kidney | Novel04894 | -- | --                                                                            |
| Kidney | Novel04909 | -- | PREDICTED: sodium/myo-inositol cotransporter 2 isoform X2                     |
| Kidney | Novel04972 | -- | PREDICTED: pro-epidermal growth factor-like                                   |
| Kidney | Novel04978 | -- | --                                                                            |
| Kidney | Novel05007 | -- | PREDICTED: uncharacterized protein LOC105067830 isoform X2                    |
| Kidney | Novel05015 | -- | --                                                                            |
| Kidney | Novel05054 | -- | --                                                                            |
| Kidney | Novel05111 | -- | --                                                                            |
| Kidney | Novel05118 | -- | PREDICTED: kallikrein-1                                                       |
| Kidney | Novel05392 | -- | unnamed protein product                                                       |

|        |            |    |                                                                                   |
|--------|------------|----|-----------------------------------------------------------------------------------|
| Kidney | Novel05393 | -- | --                                                                                |
| Kidney | Novel05444 | -- | PREDICTED: sphingosine-1-phosphate phosphatase 2-like                             |
| Kidney | Novel05490 | -- | --                                                                                |
| Kidney | Novel05498 | -- | PREDICTED: brain and acute leukemia cytoplasmic protein, partial                  |
| Kidney | Novel05528 | -- | --                                                                                |
| Kidney | Novel05546 | -- | --                                                                                |
| Kidney | Novel05562 | -- | PREDICTED: cytosolic beta-glucosidase                                             |
| Kidney | Novel05578 | -- | --                                                                                |
| Kidney | Novel05704 | -- | PREDICTED: cytochrome P450 4A6-like                                               |
| Kidney | Novel05725 | -- | PREDICTED: LOW QUALITY PROTEIN: sodium/myo-inositol cotransporter 2-like, partial |
| Kidney | Novel05915 | -- | hypothetical protein PANDA_022434, partial                                        |
| Kidney | Novel05948 | -- | PREDICTED: solute carrier family 22 member 11-like                                |
| Kidney | Novel05956 | -- | PREDICTED: multidrug and toxin extrusion protein 2-like                           |
| Kidney | Novel05996 | -- | PREDICTED: coiled-coil domain-containing protein 151                              |
