# Supplementary material for: Corrigendum to “Transcriptome Profiling across Five Tissues of Giant Panda”
Source: Hindawi journal article supplement (doi:10.1155/2022/9846545), 2022-01-01
Supplement: f5 [file 9846545.f5.pdf]

## Supplementary Information

### BioMed Research International

#### Transcriptome profiling across five tissues of giant panda

Feng Li<sup>1,2,4</sup>, Chengdong Wang<sup>3,4</sup>, Zhongxian Xu<sup>1,4</sup>, Mingzhou Li<sup>1</sup>, Linhua Deng<sup>3</sup>, Ming Wei<sup>3</sup>, Hemin Zhang<sup>3</sup>, Kai Wu<sup>3</sup>, Ruihong Ning<sup>1</sup>, Diyan Li<sup>1</sup>, Mingyao Yang<sup>1</sup>, Mingwang Zhang<sup>1</sup>, Qingyong Ni<sup>1</sup>, Bo Zeng<sup>1\*</sup>, Desheng Li<sup>3\*</sup> and Ying Li<sup>1\*</sup>

<sup>1</sup> Farm Animal Genetic Resources Exploration and Innovation Key Laboratory of Sichuan Province, Sichuan Agricultural University, Chengdu 611130, China.

<sup>2</sup> Key Laboratory of Southwest China Wildlife Resources Conservation (Ministry of Education), China West Normal University, Nanchong 637002, China.

<sup>3</sup> Key Laboratory of SFGA on Conservation Biology of Rare Animals in the Giant Panda National Park (CCRCGP), Dujiangyan 611830, China.

<sup>4</sup> These authors contributed equally to this work.

\* Correspondence should be addressed to Ying Li, [yingli@sicau.edu.cn](mailto:yingli@sicau.edu.cn); Desheng Li, [1050133153@qq.com](mailto:1050133153@qq.com); Bo Zeng, [apollobovey@163.com](mailto:apollobovey@163.com).

**Supplementary Table S5: List of significantly enriched GO terms of tissue-specific differentially expressed genes of each tissue.**

MF: molecular function, CC: cellular component, BP: biological process

| Tissue | GO ID      | Terms                                                                                                 | Term type | -log10 (Corrected p-Value) | DEG item | DEG list |
|--------|------------|-------------------------------------------------------------------------------------------------------|-----------|----------------------------|----------|----------|
| Liver  | GO:0004866 | endopeptidase inhibitor activity                                                                      | MF        | 7.77                       | 18       | 417      |
| Liver  | GO:0061135 | endopeptidase regulator activity                                                                      | MF        | 7.77                       | 18       | 417      |
| Liver  | GO:0030414 | peptidase inhibitor activity                                                                          | MF        | 7.54                       | 20       | 417      |
| Liver  | GO:0061134 | peptidase regulator activity                                                                          | MF        | 7.54                       | 20       | 417      |
| Liver  | GO:0004857 | enzyme inhibitor activity                                                                             | MF        | 4.89                       | 21       | 417      |
| Liver  | GO:0004252 | serine-type endopeptidase activity                                                                    | MF        | 4.25                       | 21       | 417      |
| Liver  | GO:0005576 | extracellular region                                                                                  | CC        | 3.75                       | 56       | 417      |
| Liver  | GO:0020037 | heme binding                                                                                          | MF        | 3.62                       | 14       | 417      |
| Liver  | GO:0005506 | iron ion binding                                                                                      | MF        | 3.43                       | 16       | 417      |
| Liver  | GO:0046906 | tetrapyrrole binding                                                                                  | MF        | 3.43                       | 14       | 417      |
| Liver  | GO:0016705 | oxidoreductase activity, acting on paired donors, with incorporation or reduction of molecular oxygen | MF        | 3.43                       | 17       | 417      |
| Liver  | GO:0008236 | serine-type peptidase activity                                                                        | MF        | 3.36                       | 22       | 417      |

|        |            |                                                       |    |       |     |     |
|--------|------------|-------------------------------------------------------|----|-------|-----|-----|
| Liver  | GO:0017171 | serine hydrolase activity                             | MF | 3.36  | 22  | 417 |
| Liver  | GO:0004867 | serine-type endopeptidase inhibitor activity          | MF | 2.99  | 9   | 417 |
| Liver  | GO:0006869 | lipid transport                                       | BP | 2.71  | 11  | 417 |
| Liver  | GO:0030212 | hyaluronan metabolic process                          | BP | 2.71  | 4   | 417 |
| Liver  | GO:1903510 | mucopolysaccharide metabolic process                  | BP | 2.71  | 4   | 417 |
| Liver  | GO:0010876 | lipid localization                                    | BP | 2.18  | 11  | 417 |
| Liver  | GO:0030234 | enzyme regulator activity                             | MF | 2.06  | 24  | 417 |
| Liver  | GO:0005615 | extracellular space                                   | CC | 2.03  | 15  | 417 |
| Liver  | GO:0016491 | oxidoreductase activity                               | MF | 1.84  | 49  | 417 |
| Liver  | GO:0055114 | oxidation-reduction process                           | BP | 1.75  | 46  | 417 |
| Liver  | GO:0004869 | cysteine-type endopeptidase inhibitor activity        | MF | 1.36  | 4   | 417 |
| Liver  | GO:0004175 | endopeptidase activity                                | MF | 1.34  | 30  | 417 |
| Spleen | GO:0005515 | protein binding                                       | MF | 2.90  | 167 | 395 |
| Kidney | GO:0005215 | transporter activity                                  | MF | 12.95 | 91  | 431 |
| Kidney | GO:0022857 | transmembrane transporter activity                    | MF | 8.72  | 74  | 431 |
| Kidney | GO:0044765 | single-organism transport                             | BP | 8.39  | 95  | 431 |
| Kidney | GO:1902578 | single-organism localization                          | BP | 8.30  | 96  | 431 |
| Kidney | GO:0022891 | substrate-specific transmembrane transporter activity | MF | 6.15  | 61  | 431 |
| Kidney | GO:0055085 | transmembrane transport                               | BP | 6.09  | 52  | 431 |
| Kidney | GO:0015075 | ion transmembrane transporter activity                | MF | 6.09  | 59  | 431 |
| Kidney | GO:0022892 | substrate-specific transporter activity               | MF | 6.09  | 63  | 431 |
| Kidney | GO:0051234 | establishment of localization                         | BP | 6.09  | 106 | 431 |
| Kidney | GO:0006810 | transport                                             | BP | 6.01  | 105 | 431 |
| Kidney | GO:0006811 | ion transport                                         | BP | 5.75  | 57  | 431 |
| Kidney | GO:0051179 | localization                                          | BP | 5.20  | 106 | 431 |
| Kidney | GO:0006820 | anion transport                                       | BP | 4.16  | 17  | 431 |
| Kidney | GO:0008509 | anion transmembrane transporter activity              | MF | 4.08  | 14  | 431 |
| Kidney | GO:0015698 | inorganic anion transport                             | BP | 3.11  | 10  | 431 |
| Kidney | GO:0015103 | inorganic anion transmembrane transporter activity    | MF | 2.86  | 8   | 431 |
| Kidney | GO:0005216 | ion channel activity                                  | MF | 2.17  | 26  | 431 |
| Kidney | GO:0022838 | substrate-specific channel activity                   | MF | 2.17  | 26  | 431 |
| Kidney | GO:0015267 | channel activity                                      | MF | 2.17  | 26  | 431 |
| Kidney | GO:0022803 | passive transmembrane transporter activity            | MF | 2.17  | 26  | 431 |
| Kidney | GO:0016020 | membrane                                              | CC | 2.15  | 172 | 431 |
| Kidney | GO:0001533 | cornified envelope                                    | CC | 2.01  | 4   | 431 |

|        |            |                                                               |    |      |    |     |
|--------|------------|---------------------------------------------------------------|----|------|----|-----|
| Kidney | GO:0015321 | sodium-dependent phosphate transmembrane transporter activity | MF | 1.91 | 3  | 431 |
| Kidney | GO:0044341 | sodium-dependent phosphate transport                          | BP | 1.91 | 3  | 431 |
| Kidney | GO:0008324 | cation transmembrane transporter activity                     | MF | 1.41 | 35 | 431 |
| Kidney | GO:0005509 | calcium ion binding                                           | MF | 1.35 | 27 | 431 |
