# Supplementary material for: Corrigendum to “Transcriptome Profiling across Five Tissues of Giant Panda”
Source: Hindawi journal article supplement (doi:10.1155/2022/9846545), 2022-01-01
Supplement: f6 [file 9846545.f6.pdf]

## Supplementary Information

### BioMed Research International

#### Transcriptome profiling across five tissues of giant panda

Feng Li<sup>1,2,4</sup>, Chengdong Wang<sup>3,4</sup>, Zhongxian Xu<sup>1,4</sup>, Mingzhou Li<sup>1</sup>, Linhua Deng<sup>3</sup>, Ming Wei<sup>3</sup>, Hemin Zhang<sup>3</sup>, Kai Wu<sup>3</sup>, Ruihong Ning<sup>1</sup>, Diyan Li<sup>1</sup>, Mingyao Yang<sup>1</sup>, Mingwang Zhang<sup>1</sup>, Qingyong Ni<sup>1</sup>, Bo Zeng<sup>1\*</sup>, Desheng Li<sup>3\*</sup> and Ying Li<sup>1\*</sup>

<sup>1</sup> Farm Animal Genetic Resources Exploration and Innovation Key Laboratory of Sichuan Province, Sichuan Agricultural University, Chengdu 611130, China.

<sup>2</sup> Key Laboratory of Southwest China Wildlife Resources Conservation (Ministry of Education), China West Normal University, Nanchong 637002, China.

<sup>3</sup> Key Laboratory of SFGA on Conservation Biology of Rare Animals in the Giant Panda National Park (CCRCGP), Dujiangyan 611830, China.

<sup>4</sup> These authors contributed equally to this work.

\* Correspondence should be addressed to Ying Li, [yingli@sicau.edu.cn](mailto:yingli@sicau.edu.cn); Desheng Li, [1050133153@qq.com](mailto:1050133153@qq.com); Bo Zeng, [apollobovey@163.com](mailto:apollobovey@163.com).

**Supplementary Table S6: List of significantly enriched KEGG pathways of tissue-specific differentially expressed genes of each tissue.**

| Tissue | KEGG ID  | Pathway                                                | Input number | Background number | -log10 (Corrected p-Value) |
|--------|----------|--------------------------------------------------------|--------------|-------------------|----------------------------|
| Heart  | aml05410 | Hypertrophic cardiomyopathy (HCM)                      | 29           | 78                | 10.93                      |
| Heart  | aml05414 | Dilated cardiomyopathy (DCM)                           | 29           | 81                | 10.89                      |
| Heart  | aml05412 | Arrhythmogenic right ventricular cardiomyopathy (ARVC) | 24           | 69                | 8.74                       |
| Heart  | aml04024 | cAMP signaling pathway                                 | 35           | 187               | 6.90                       |
| Heart  | aml04260 | Cardiac muscle contraction                             | 18           | 75                | 4.43                       |
| Heart  | aml04261 | Adrenergic signaling in cardiomyocytes                 | 25           | 142               | 4.36                       |
| Heart  | aml05416 | Viral myocarditis                                      | 11           | 52                | 2.03                       |
| Heart  | aml04921 | Oxytocin signaling pathway                             | 19           | 148               | 1.66                       |
| Heart  | aml04020 | Calcium signaling pathway                              | 21           | 173               | 1.66                       |
| Kidney | aml04964 | Proximal tubule bicarbonate reclamation                | 7            | 22                | 26.08                      |
| Kidney | aml04976 | Bile secretion                                         | 10           | 64                | 7.96                       |

|        |          |                                                           |    |      |      |
|--------|----------|-----------------------------------------------------------|----|------|------|
| Kidney | aml04610 | Complement and coagulation cascades                       | 9  | 63   | 5.74 |
| Kidney | aml04971 | Gastric acid secretion                                    | 9  | 70   | 5.21 |
| Kidney | aml04966 | Collecting duct acid secretion                            | 6  | 26   | 3.82 |
| Kidney | aml04961 | Endocrine and other factor-regulated calcium reabsorption | 7  | 42   | 3.70 |
| Kidney | aml00460 | Cyanoamino acid metabolism                                | 3  | 5    | 3.70 |
| Kidney | aml00910 | Nitrogen metabolism                                       | 4  | 16   | 3.70 |
| Kidney | aml04977 | Vitamin digestion and absorption                          | 4  | 20   | 3.60 |
| Kidney | aml00330 | Arginine and proline metabolism                           | 6  | 56   | 3.32 |
| Kidney | aml00340 | Histidine metabolism                                      | 4  | 23   | 3.22 |
| Liver  | aml04610 | Complement and coagulation cascades                       | 37 | 63   | 2.92 |
| Liver  | aml00140 | Steroid hormone biosynthesis                              | 15 | 38   | 2.53 |
| Liver  | aml05204 | Chemical carcinogenesis                                   | 14 | 52   | 2.25 |
| Liver  | aml00830 | Retinol metabolism                                        | 12 | 41   | 2.08 |
| Liver  | aml01100 | Metabolic pathways                                        | 70 | 1131 | 2.02 |
| Liver  | aml05150 | Staphylococcus aureus infection                           | 10 | 42   | 1.91 |
| Liver  | aml00591 | Linoleic acid metabolism                                  | 8  | 24   | 1.91 |
| Liver  | aml00980 | Metabolism of xenobiotics by cytochrome P450              | 10 | 43   | 1.91 |
| Liver  | aml00982 | Drug metabolism - cytochrome P450                         | 10 | 45   | 1.60 |
| Liver  | aml00500 | Starch and sucrose metabolism                             | 9  | 39   | 1.51 |
| Liver  | aml00053 | Ascorbate and aldarate metabolism                         | 6  | 14   | 1.46 |
| Liver  | aml01230 | Biosynthesis of amino acids                               | 11 | 70   | 1.44 |
| Liver  | aml00590 | Arachidonic acid metabolism                               | 9  | 53   | 5.12 |
| Liver  | aml00120 | Primary bile acid biosynthesis                            | 5  | 15   | 4.64 |
| Liver  | aml04975 | Fat digestion and absorption                              | 7  | 38   | 4.02 |
| Liver  | aml00983 | Drug metabolism - other enzymes                           | 6  | 28   | 3.58 |
| Liver  | aml02010 | ABC transporters                                          | 7  | 42   | 3.50 |
| Liver  | aml00040 | Pentose and glucuronate interconversions                  | 5  | 20   | 3.31 |
| Liver  | aml00330 | Arginine and proline metabolism                           | 8  | 56   | 3.26 |
| Liver  | aml04976 | Bile secretion                                            | 8  | 64   | 2.95 |
| Liver  | aml03320 | PPAR signaling pathway                                    | 8  | 67   | 2.81 |
| Liver  | aml00260 | Glycine, serine and threonine metabolism                  | 6  | 40   | 2.81 |
| Liver  | aml00860 | Porphyrin and chlorophyll metabolism                      | 5  | 28   | 2.60 |
| Lung   | aml04024 | cAMP signaling pathway                                    | 16 | 187  | 2.59 |
| Lung   | aml00592 | alpha-Linolenic acid metabolism                           | 6  | 20   | 2.52 |
| Lung   | aml04610 | Complement and coagulation cascades                       | 8  | 63   | 2.35 |
| Lung   | aml05150 | Staphylococcus aureus infection                           | 6  | 42   | 2.35 |
| Lung   | aml04640 | Hematopoietic cell lineage                                | 7  | 78   | 2.07 |

|        |          |                                              |    |     |      |
|--------|----------|----------------------------------------------|----|-----|------|
| Lung   | aml00591 | Linoleic acid metabolism                     | 4  | 24  | 1.79 |
| Spleen | aml04672 | Intestinal immune network for IgA production | 12 | 40  | 1.70 |
| Spleen | aml05340 | Primary immunodeficiency                     | 10 | 30  | 1.70 |
| Spleen | aml04514 | Cell adhesion molecules (CAMs)               | 17 | 124 | 1.53 |
| Spleen | aml05144 | Malaria                                      | 10 | 45  | 1.38 |
| Spleen | aml05321 | Inflammatory bowel disease (IBD)             | 11 | 59  | 1.37 |
| Spleen | aml05330 | Allograft rejection                          | 8  | 30  | 3.68 |
| Spleen | aml05310 | Asthma                                       | 7  | 22  | 3.27 |
| Spleen | aml04940 | Type I diabetes mellitus                     | 8  | 36  | 2.57 |
| Spleen | aml04020 | Calcium signaling pathway                    | 17 | 173 | 2.00 |
| Spleen | aml04640 | Hematopoietic cell lineage                   | 11 | 78  | 1.48 |
| Spleen | aml04060 | Cytokine-cytokine receptor interaction       | 18 | 201 | 1.34 |
| Spleen | aml04064 | NF-kappa B signaling pathway                 | 11 | 85  | 3.34 |
| Spleen | aml04660 | T cell receptor signaling pathway            | 12 | 103 | 3.33 |
| Spleen | aml05320 | Autoimmune thyroid disease                   | 7  | 37  | 2.76 |
| Spleen | aml05332 | Graft-versus-host disease                    | 6  | 26  | 2.65 |
| Spleen | aml05142 | Chagas disease (American trypanosomiasis)    | 11 | 103 | 2.65 |
| Spleen | aml04612 | Antigen processing and presentation          | 7  | 49  | 2.55 |
| Spleen | aml05162 | Measles                                      | 11 | 118 | 1.86 |
| Spleen | aml05416 | Viral myocarditis                            | 7  | 52  | 1.72 |
| Spleen | aml05150 | Staphylococcus aureus infection              | 6  | 42  | 1.46 |
| Spleen | aml05323 | Rheumatoid arthritis                         | 8  | 78  | 1.36 |
| Spleen | aml05166 | HTLV-I infection                             | 16 | 237 | 1.35 |
