# Supplementary material for: Corrigendum to “Transcriptome Profiling across Five Tissues of Giant Panda”
Source: Hindawi journal article supplement (doi:10.1155/2022/9846545), 2022-01-01

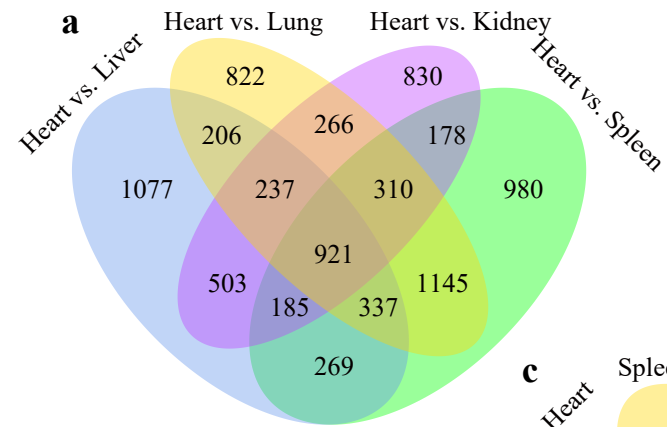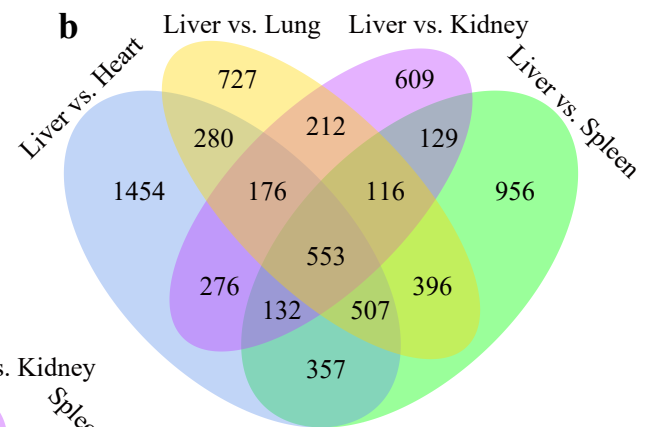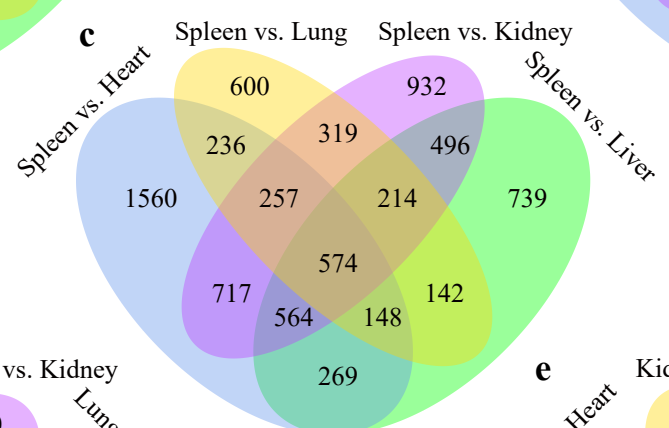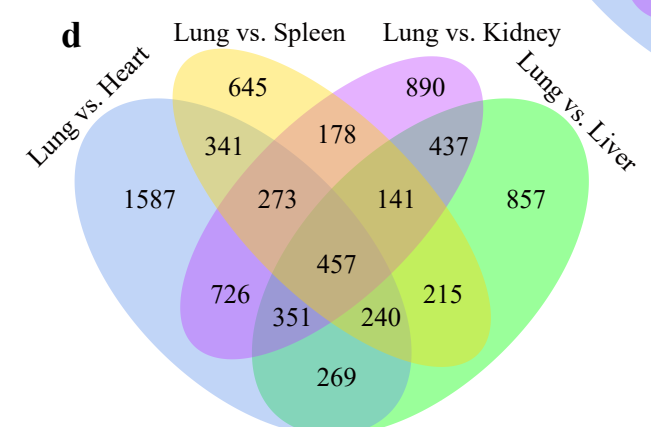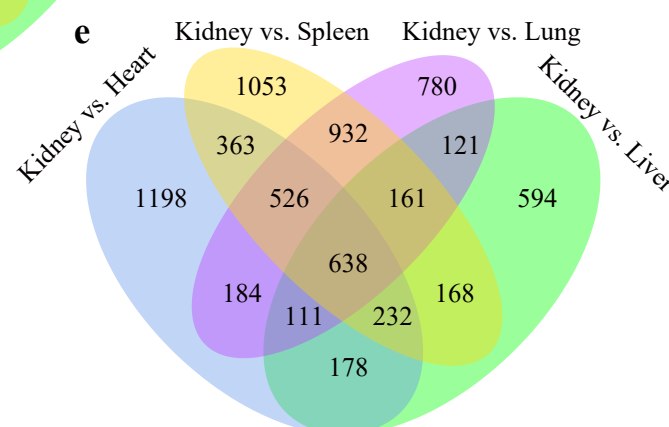

Supplement: f7 [file 9846545.f7.pdf]
