# Supplementary material for: Corrigendum to “Transcriptome Profiling across Five Tissues of Giant Panda”
Source: Biomed Res Int. 2022 May 19;2022:9846545. doi: 10.1155/2022/9846545 (PMC9136632; doi:10.1155/2022/9846545)
Supplement: Supplementary 3 — Table S3: details of all genes mapped to the giant panda reference genome in the present study. [file 9846545.f3.xlsx]

## Sheet: Sheet1
Supplementary Table S3. Details of all genes mapped to the giant panda reference genome in the present study.
Gene_id	chromosome	Strand	start	end	length	Heart_1_readcount	Heart_2_readcount	Heart_3_readcount	Heart_4_readcount	Heart_5_readcount	Liver_1_readcount	Liver_2_readcount	Liver_3_readcount	Liver_4_readcount	Liver_5_readcount	Spleen_1_readcount	Spleen_2_readcount	Spleen_3_readcount	Spleen_4_readcount	Spleen_5_readcount	Lung_1_readcount	Lung_2_readcount	Lung_3_readcount	Lung_4_readcount	Lung_5_readcount	Kidney_1_readcount	Kidney_2_readcount	Kidney_3_readcount	Kidney_4_readcount	Kidney_5_readcount	Heart_1_fpkm	Heart_2_fpkm	Heart_3_fpkm	Heart_4_fpkm	Heart_5_fpkm	Liver_1_fpkm	Liver_2_fpkm	Liver_3_fpkm	Liver_4_fpkm	Liver_5_fpkm	Spleen_1_fpkm	Spleen_2_fpkm	Spleen_3_fpkm	Spleen_4_fpkm	Spleen_5_fpkm	Lung_1_fpkm	Lung_2_fpkm	Lung_3_fpkm	Lung_4_fpkm
ENSAMEG00000000001	GL194274.1	-	250146	275054	1422	0	0	0	0	0	174	45	33	42	160	0	0	0	0	0	0	0	1	0	1	130	32	165	21	234	0	0	0	0	0	6.56202	1.56611	1.24805	1.85457	5.26192	0	0	0	0	0	0	0	0.0511355	0
ENSAMEG00000000002	GL195495.1	+	1717	19693	645	11	3	0	1	6	28	19	0	17	29	20	14	0	17	25	23	26	0	34	51	10	22	0	66	11	1.00036	0.303153	0	0.0925321	0.525105	2.32802	1.45782	0	1.65495	2.10263	2.26296	1.61401	0	1.74543	2.2288	2.19902	3.0655	0	3.61
ENSAMEG00000000003	GL194954.1	+	47102	95963	1800	230	434	224	305	190	77	68	26	53	68	401	354	294	400	360	353	384	497	418	378	189	133	270	160	193	7.49513	15.7151	7.54602	10.113	5.95849	2.29407	1.86958	0.776818	1.84883	1.76669	16.2584	14.6241	12.0228	14.7164	11.5006	12.0938	16.2236	20.0773	15.9034
ENSAMEG00000000004	GL194954.1	+	59058	63676	1098	14571	13888	22474	20577	21336	13596	17680	17592	14459	21593	10783	9967	20406	14171	21828	9385	8715	16401	12312	12221	10362	20950	18435	39348	15497	778.414	824.399	1241.14	1118.49	1096.9	664.044	796.872	861.651	826.857	919.675	716.711	674.996	1368	854.698	1143.15	527.1	603.605	1086.15	767.916
ENSAMEG00000000005	GL194954.1	-	65687	74519	1869	596	312	484	389	432	497	422	54	309	339	866	798	816	767	845	940	856	1080	750	953	864	632	973	519	782	18.7051	10.8804	15.7028	12.422	13.0476	14.2605	11.1741	1.55383	10.3811	8.48231	33.8155	31.7492	32.1374	27.1769	25.9979	31.0155	34.8299	42.0181	27.4814
ENSAMEG00000000006	GL193959.1	-	219246	225379	1632	67	20	23	23	36	200	18	0	12	55	112	34	21	18	65	180	45	68	27	86	66	29	42	10	20	2.40812	0.798748	0.854574	0.841124	1.24519	6.572	0.545835	0	0.461695	1.57604	5.00847	1.54917	0.947173	0.73041	2.29026	6.80163	2.09691	3.02978	1.133
ENSAMEG00000000007	GL193959.1	+	237965	240037	513	62	1	20	3	65	123	21	101	17	226	55	16	59	20	86	34	17	52	16	62	68	30	61	17	85	7.08921	0.127052	2.36404	0.349025	7.15239	12.8581	2.02587	10.5882	2.08078	20.6023	7.82442	2.31922	8.46574	2.58183	9.63991	4.08717	2.52011	7.37069	2.13595
ENSAMEG00000000008	GL193959.1	+	251818	325300	1806	0	0	1	3	7	1307	699	84	508	806	0	1	3	2	0	0	3	1	3	5	7439	8767	5988	1827	9157	0	0	0.0335757	0.0991415	0.218794	38.8102	19.1544	2.50138	17.662	20.8709	0	0.0411738	0.122274	0.0733376	0	0	0.126326	0.0402628	0.11376
ENSAMEG00000000009	GL193959.1	+	334942	337849	1359	1	0	0	0	0	0	0	0	0	0	0	0	1	0	0	0	0	0	0	0	0	2	0	0	3	0.0431623	0	0	0	0	0	0	0	0	0	0	0	0.054164	0	0	0	0	0	0
ENSAMEG00000000010	GL193959.1	+	350316	354414	1065	0	0	0	0	0	0	0	0	0	0	0	0	0	0	0	2	0	0	0	0	0	1	0	0	0	0	0	0	0	0	0	0	0	0	0	0	0	0	0	0	0.115809	0	0	0
ENSAMEG00000000011	GL193959.1	-	395665	396565	327	0	0	0	0	0	0	0	0	0	0	0	0	0	0	0	0	0	0	0	0	0	0	0	0	0	0	0	0	0	0	0	0	0	0	0	0	0	0	0	0	0	0	0	0
ENSAMEG00000000012	GL193805.1	-	265542	272824	519	160	108	168	182	171	397	523	763	389	695	386	296	500	424	703	478	492	531	499	635	358	312	457	436	477	18.0832	13.563	19.6284	20.9294	18.5987	41.0215	49.8704	79.0634	47.0627	62.624	54.2784	42.4095	70.9142	54.1019	77.8896	56.7965	72.0918	74.3959	65.8447
ENSAMEG00000000013	GL193805.1	+	311640	375752	3834	15	3	12	11	16	15	3	0	5	19	80	46	109	100	109	69	83	122	119	125	13	4	19	16	19	0.229489	0.0509999	0.189789	0.171235	0.235572	0.20981	0.0387238	0	0.0818865	0.231753	1.52281	0.892164	2.09269	1.72728	1.63481	1.10983	1.64632	2.31382	2.1256
ENSAMEG00000000014	GL193805.1	+	397348	403432	978	29	71	31	70	23	33	71	9	39	20	471	478	405	348	373	236	734	631	1013	134	64	73	35	121	30	1.73933	4.73173	1.92205	4.2718	1.32753	1.80952	3.59276	0.494905	2.50392	0.956345	35.1471	36.3436	30.4822	23.5643	21.9312	14.8811	57.0749	46.9151	70.9346
ENSAMEG00000000015	GL193805.1	+	423328	428991	342	52	42	58	540	78	14405	12707	5507	8669	8038	758	1072	884	979	906	934	1388	993	1961	617	22489	37696	14868	3493	18656	8.91869	8.0043	10.2836	94.2366	12.8743	2258.79	1838.76	865.979	1591.61	1099.12	161.752	233.081	190.264	189.571	152.333	168.415	308.639	211.128	392.68
ENSAMEG00000000016	GL193805.1	-	450524	474402	1362	0	0	0	1	1	0	36	23	51	5	60	20	133	35	133	1	10	4	11	5	18	81	152	15	24	0	0	0	0.0438203	0.0414455	0	1.30808	0.908174	2.35119	0.171679	3.215	1.09192	7.18795	1.70179	5.61521	0.0452776	0.558356	0.213553	0.553099
ENSAMEG00000000017	GL193589.1	-	51674	91608	1743	2	2	4	4	0	785	479	15	294	345	29	81	49	77	48	809	1569	1156	1937	593	183	95	93	24	172	0.0673064	0.0747882	0.139157	0.136967	0	24.1524	13.6002	0.46282	10.5912	9.25647	1.21425	3.45562	2.06933	2.92555	1.58356	28.6228	68.4563	48.2261	76.1061
ENSAMEG00000000018	GL193589.1	+	120163	146396	1314	0	0	0	0	0	78	20	30	18	127	0	4	1	3	0	14	41	86	51	24	135	45	52	11	283	0	0	0	0	0	3.18337	0.753257	1.22785	0.860145	4.51993	0	0.226362	0.0560189	0.151196	0	0.657043	2.37288	4.7591	2.65804
ENSAMEG00000000019	GL193589.1	-	178242	202498	945	0	0	0	0	0	0	1	0	0	0	1	1	0	0	0	1	0	0	0	1	1	10	0	0	3	0	0	0	0	0	0	0.0523693	0	0	0	0.0772281	0.0786878	0	0	0	0.0652573	0	0	0
ENSAMEG00000000020	GL193589.1	+	218242	246267	3474	2641	619	1060	409	943	18	3	0	4	11	49	45	43	39	60	61	3	18	3	47	15	6	8	1	17	44.5925	11.6134	18.502	7.02661	15.3228	0.277863	0.0427366	0	0.0722977	0.148077	1.02937	0.963211	0.911106	0.743445	0.993146	1.08283	0.0656719	0.37676	0.0591397
ENSAMEG00000000021	GL193589.1	+	417517	486857	2268	42	76	42	75	33	16	118	3	89	27	94	142	56	124	112	113	139	93	175	111	74	42	54	91	40	1.08625	2.18409	1.12292	1.97365	0.821345	0.378325	2.57482	0.0711372	2.464	0.55673	3.02477	4.65569	1.8175	3.6207	2.83966	3.07253	4.66079	2.98169	5.28424
ENSAMEG00000000022	GL193589.1	-	501971	513474	942	5	0	0	7	4	8	5	7	1	10	1194	91	350	200	1662	115	54	101	66	91	2	9	6	2	3	0.311346	0	0	0.443506	0.239698	0.455436	0.26268	0.399637	0.0666566	0.496447	92.504	7.18339	27.3494	14.0603	101.455	7.52849	4.35944	7.79637	4.79822
ENSAMEG00000000024	GL193590.1	-	69535	592909	1019	391	355	319	635	313	2633	3274	438	2244	3132	3242	3615	3667	4136	5211	1552	1181	1525	1439	1727	1350	1758	2199	1130	1836	14.7398	14.8703	12.4315	24.3566	11.3551	90.7463	104.13	15.1385	90.554	94.1317	152.058	172.758	173.473	176.029	192.576	61.5096	57.7203	71.266	63.3343
ENSAMEG00000000025	GL194047.1	-	13303	95885	1284	0	0	0	0	0	1	1	0	0	0	0	4	0	1	0	2	7	14	0	6	95	71	188	15	158	0	0	0	0	0	0.041766	0.0385428	0	0	0	0	0.231651	0	0.0515762	0	0.0960563	0.414592	0.792839	0
ENSAMEG00000000026	GL194047.1	+	16560	360182	1914	294	248	299	336	229	338	266	85	213	295	170	163	195	218	239	464	334	405	385	578	1554	994	2289	509	2055	10.3265	9.67911	10.8567	12.0081	7.74059	10.854	7.88268	2.73729	8.00862	8.26093	7.42916	7.25788	8.59505	8.64479	8.22949	17.1341	15.2096	17.6344	15.7882
ENSAMEG00000000027	GL194283.1	-	15209	97531	1916	150	86	129	112	132	151	200	66	166	199	285	237	229	256	398	575	334	427	365	655	437	193	553	266	504	4.59219	2.92552	4.0826	3.48879	3.88896	4.22639	5.16587	1.85254	5.4401	4.85715	10.8557	9.19797	8.79772	8.84828	11.9448	18.5069	13.2568	16.2052	13.0462
ENSAMEG00000000028	GL194283.1	+	138949	211310	1325	97	255	194	259	121	1397	5276	1408	3803	1750	8	26	33	40	10	26	172	59	116	63	1455	3326	2370	750	1965	4.29417	12.5437	8.87826	11.6664	5.15495	56.5416	197.06	57.1485	180.221	61.7655	0.440637	1.45914	1.83328	1.99921	0.433986	1.21009	9.8719	3.23786	5.99556
ENSAMEG00000000029	GL194256.1	+	20630	24056	609	0	0	4	4	0	9	12	18	6	15	6	3	12	4	3	69	99	321	9	116	5	8	9	8	6	0	0	0.398277	0.392008	0	0.792525	0.975153	1.58955	0.618626	1.15185	0.71902	0.366305	1.45042	0.434968	0.283267	6.98703	12.3625	38.3274	1.01207
ENSAMEG00000000030	GL194256.1	-	25965	29237	1515	92	26	42	26	61	100	49	14	33	68	366	187	290	144	230	300	248	342	227	257	1320	1648	1155	203	996	3.56204	1.11856	1.68104	1.02427	2.27286	3.53977	1.60063	0.496974	1.36772	2.09904	17.6309	9.17842	14.0902	6.29454	8.72985	12.2115	12.4488	16.4148	10.2613
ENSAMEG00000000031	GL194256.1	-	30674	39464	2931	436	177	174	128	224	729	434	16	240	306	724	454	456	263	467	933	525	582	450	656	897	851	686	316	628	8.72558	3.93602	3.59978	2.60643	4.31407	13.3383	7.32795	0.293577	5.1415	4.88235	18.0273	11.5181	11.4519	5.9423	9.16205	19.6303	13.6217	14.4387	10.5144
ENSAMEG00000000032	GL194256.1	-	47535	58510	1941	21	15	15	9	6	16	10	0	13	3	37	41	43	31	34	42	49	52	42	42	61	12	30	15	35	0.634625	0.503693	0.468606	0.276738	0.174494	0.442061	0.254967	0	0.420545	0.0722802	1.39118	1.57071	1.6307	1.05767	1.00727	1.3344	1.91981	1.94805	1.48187
ENSAMEG00000000033	GL194256.1	-	68554	74072	1557	83	32	62	44	76	150	105	50	86	118	264	206	231	182	274	135	155	176	197	178	173	108	193	37	168	3.12689	1.33956	2.4146	1.68662	2.75537	5.16643	3.33741	1.72703	3.4682	3.54419	12.3743	9.83824	10.9208	7.741	10.1194	5.34695	7.57062	8.21951	8.66493
ENSAMEG00000000034	GL194256.1	-	85092	93225	2121	203	140	180	148	100	191	253	8	146	76	692	594	383	445	536	470	462	345	465	311	566	713	382	271	396	5.61409	4.30217	5.14605	4.1646	2.66143	4.82926	5.90321	0.202847	4.32222	1.6757	23.8107	20.825	13.2919	13.8942	14.5317	13.6653	16.5649	11.8277	15.0141
ENSAMEG00000000035	GL193810.1	+	1211	13926	2661	1322	663	665	681	685	1609	1209	119	728	712	5329	5660	3122	4120	3710	6552	5388	3960	4924	4672	1557	1519	1360	1089	836	29.1414	16.2394	15.1537	15.2741	14.5312	32.4264	22.4849	2.40503	17.1783	12.5129	146.153	158.165	86.3611	102.534	80.1716	151.841	153.982	108.211	126.725
ENSAMEG00000000036	GL194256.1	+	98946	104572	1653	349	126	288	155	159	794	581	67	365	410	957	777	913	533	768	768	524	648	543	524	732	874	742	322	528	12.3844	4.96819	10.5648	5.59643	5.42974	25.7594	17.3945	2.17982	13.8648	11.5994	42.2519	34.9532	40.6563	21.3535	26.7165	28.6516	24.1072	28.5052	22.4965
ENSAMEG00000000037	GL193810.1	+	31987	47827	1970	397	425	370	433	323	338	287	123	211	286	887	856	661	840	1021	571	1017	837	1046	623	500	357	602	397	466	11.8208	14.0612	11.3888	13.1182	9.25532	9.20107	7.20982	3.35782	6.72528	6.78928	32.8598	32.3107	24.6982	28.2376	29.8024	17.8744	39.2593	30.8945	36.3624
ENSAMEG00000000039	GL194256.1	-	105781	113156	1086	502	228	402	180	529	866	610	609	445	710	406	270	330	271	492	335	236	261	238	348	828	931	700	252	822	27.1142	13.6838	22.446	9.89224	27.4967	42.7638	27.7977	30.1582	25.7291	30.574	27.2837	18.4873	22.3673	16.5255	26.0512	19.0229	16.5261	17.4756	15.0084
ENSAMEG00000000040	GL193810.1	+	49914	55217	705	470	385	468	458	291	316	420	374	349	412	709	803	811	1060	922	861	860	1013	985	858	404	466	670	494	475	39.105	35.5936	40.2531	38.7729	23.3002	24.0373	29.4828	28.5299	31.0836	27.3295	73.3946	84.6965	84.6763	99.5706	75.2027	75.3139	92.7678	104.482	95.683
ENSAMEG00000000041	GL193810.1	-	66083	81423	1311	107	39	64	44	31	1	1	0	0	1	31	24	9	22	25	83	45	59	44	82	38	15	30	16	18	4.78746	1.93893	2.96019	2.0031	1.33479	0.0409058	0.037749	0	0	0.0356715	1.7257	1.36128	0.505324	1.11131	1.09655	3.90424	2.61035	3.27244	2.29846
ENSAMEG00000000042	GL194256.1	-	115302	124608	2835	330	96	333	127	270	545	333	126	218	327	1393	850	1347	954	1566	1370	661	1349	662	1415	943	905	1370	973	849	6.82786	2.20708	7.12251	2.67364	5.37608	10.3094	5.81299	2.39021	4.82834	5.39409	35.8596	22.2949	34.974	22.2848	31.7636	29.8008	17.7311	34.6004	15.9916
ENSAMEG00000000043	GL193810.1	+	85418	147000	6693	750	481	391	497	517	413	257	24	251	213	1546	1542	1046	1347	1190	1032	811	965	833	943	805	522	742	394	622	6.57301	4.68408	3.5424	4.43188	4.36038	3.30915	1.90029	0.192845	2.35476	1.48827	16.8576	17.1318	11.5038	13.3279	10.2239	9.50867	9.21485	10.484	8.52338
ENSAMEG00000000044	GL194256.1	+	134280	143480	2997	416	536	291	834	309	1488	4659	17	2416	966	2181	2385	1248	2166	2168	1470	1658	840	1627	1132	1263	1218	974	800	872	8.14198	11.6568	5.88774	16.6085	5.82005	26.6259	76.9333	0.305057	50.618	15.0735	53.11	59.1753	30.652	47.8615	41.5972	30.2476	42.0713	20.3805	37.1782
ENSAMEG00000000045	GL193810.1	-	147410	151363	1719	378	196	225	208	314	399	341	46	265	262	734	767	582	859	648	577	339	557	387	486	323	287	329	238	282	12.8985	7.43157	7.93686	7.2217	10.3112	12.4476	9.81719	1.43913	9.67976	7.12769	31.1621	33.1786	24.9217	33.0927	21.6766	20.6995	14.9973	23.5614	15.4178
ENSAMEG00000000046	GL194256.1	+	163038	167407	1353	89	20	55	20	52	1921	906	17	506	1281	108	68	158	36	124	145	73	113	45	168	3076	3526	2730	498	2919	3.94896	0.98605	2.52275	0.902923	2.22038	77.9262	33.9161	0.691569	24.0333	45.3149	5.9621	3.82487	8.79743	1.80337	5.39364	6.7639	4.19933	6.2154	2.33114
ENSAMEG00000000047	GL193810.1	-	160780	174468	1203	367	183	258	218	312	761	785	239	639	584	939	769	738	739	1010	620	738	695	713	687	995	787	961	531	890	17.8947	9.91484	13.0046	10.8154	14.6401	33.924	32.2933	10.6844	33.3526	22.7024	56.9649	47.5335	45.1566	40.6811	48.2778	31.7824	46.6529	42.0089	40.5893
ENSAMEG00000000048	GL194256.1	-	168894	171264	660	315	36	268	47	265	538	315	563	252	555	610	322	529	268	537	387	183	595	264	495	749	728	767	342	691	27.9956	3.55516	24.6226	4.25017	22.6651	43.7146	23.6197	45.8757	23.9746	39.3254	67.4517	36.2786	58.9986	26.8909	46.7867	36.16	21.0861	65.5534	27.3935
ENSAMEG00000000049	GL193810.1	+	221734	366519	9099	846	1023	1150	1535	856	390	751	88	821	341	2125	2343	1824	3101	2539	2585	3051	2372	3624	3110	1225	787	1933	2185	1304	5.45381	7.32794	7.66384	10.0685	5.3105	2.29858	4.08465	0.520125	5.66557	1.75261	17.044	19.1477	14.7558	22.5695	16.0458	17.5197	25.4998	18.9558	27.2761
ENSAMEG00000000050	GL193810.1	-	374277	390402	2559	1723	801	658	633	756	3573	1691	315	1165	2546	2439	2157	1309	1194	1453	3361	1586	1225	1672	2101	3283	3296	1568	890	1650	39.4947	20.4015	15.5919	14.7634	16.6766	74.8774	32.7026	6.62001	28.5858	46.5277	69.5582	62.6785	37.653	30.8993	32.6503	80.9952	47.1326	34.8087	44.7459
ENSAMEG00000000051	GL194256.1	+	171935	173654	378	9130	7264	13871	10116	14598	8316	17980	23119	12556	21457	6875	5486	14360	9901	18231	6803	5525	14867	8404	9874	6806	13581	13740	24260	13442	1416.78	1252.52	2225.14	1597.24	2180	1179.81	2354	3289.24	2085.71	2654.61	1327.36	1079.2	2796.36	1734.61	2773.39	1109.86	1111.55	2859.92	1522.59
ENSAMEG00000000052	GL194256.1	-	173919	180769	1029	281	140	298	181	347	283	149	187	166	360	676	417	624	509	745	404	378	848	522	561	475	392	626	213	482	16.0182	8.86774	17.5608	10.4982	19.0357	14.7489	7.16605	9.77338	10.1295	16.361	47.9445	30.1342	44.6375	32.758	41.6325	24.2118	27.936	59.9242	34.741
ENSAMEG00000000053	GL194256.1	-	187996	196958	975	2	0	0	0	0	1	0	0	0	0	4	2	5	9	2	0	5	2	5	1	1	0	3	0	1	0.120323	0	0	0	0	0.0550026	0	0	0	0	0.299407	0.152533	0.377482	0.611297	0.117955	0	0.38999	0.149158	0.351199
ENSAMEG00000000054	GL194256.1	-	203981	205786	555	5	1	1	1	1	13	3	0	1	8	76	15	35	10	36	12	9	9	14	14	79	53	37	3	45	0.528446	0.117438	0.109257	0.107537	0.10171	1.25614	0.267508	0	0.113136	0.674094	9.99373	2.00973	4.642	1.19322	3.72993	1.33337	1.23321	1.17916	1.72752
ENSAMEG00000000055	GL193810.1	+	403916	410886	1764	4	0	0	2	3	7858	2653	264	1445	2659	6	13	17	6	12	3	4	5	3	8	1572	798	775	110	1103	0.13301	0	0	0.067668	0.0960014	238.892	74.4299	8.04866	51.4356	70.4926	0.248233	0.548004	0.709383	0.225251	0.391178	0.104878	0.172445	0.206107	0.116469
ENSAMEG00000000056	GL194256.1	+	245196	253633	3945	371	78	147	115	151	537	522	12	331	145	1018	932	361	477	655	2125	554	406	782	1014	1228	864	500	814	494	5.51633	1.28869	2.2595	1.73981	2.16065	7.29987	6.54835	0.163588	5.26836	1.71888	18.8325	17.5674	6.73582	8.00729	9.54742	33.2179	10.6795	7.48344	13.5752
ENSAMEG00000000057	GL194256.1	-	257470	267208	1125	0	2	0	2	1	3	3	3	4	1	175	67	231	90	207	13	20	44	16	11	3	2	3	6	7	0	0.115872	0	0.106103	0.0501767	0.143007	0.131971	0.143413	0.223255	0.0415691	11.3525	4.42855	15.1144	5.29791	10.5806	0.71261	1.35197	2.84395	0.973991
ENSAMEG00000000058	GL195044.1	-	1625	10504	549	18	10	9	3	1	29	12	10	5	7	42	44	30	30	28	35	22	21	19	15	43	30	25	7	18	1.9232	1.18721	0.994059	0.326138	0.102821	2.83278	1.08173	0.979594	0.571863	0.596279	5.58321	5.95963	4.02234	3.61879	2.93277	3.93148	3.04746	2.78144	2.37011
ENSAMEG00000000059	GL195044.1	-	11085	20632	1314	1639	969	1265	964	1685	972	612	603	468	881	468	396	427	360	633	560	237	455	261	466	902	997	780	473	927	73.1656	48.065	58.3764	43.7859	72.3868	39.6697	23.0497	24.6797	22.3638	31.3548	25.9931	22.4098	23.9201	18.1435	27.7013	26.2817	13.7164	25.179	13.6029
ENSAMEG00000000060	GL192507.1	+	20736	185828	887	0	0	0	1	0	0	0	0	0	0	23	13	4	21	21	5	20	17	1	4	2	7	9	2	1	0	0	0	0.0672866	0	0	0	0	0	0	1.89239	1.08983	0.331945	1.56787	1.36141	0.347622	1.71473	1.39363	0.0772083
ENSAMEG00000000061	GL192507.1	+	201206	222433	2103	166	102	97	153	115	170	196	9	123	68	548	855	621	553	390	548	552	610	596	494	429	522	431	336	275	4.63012	3.16127	2.79689	4.34214	3.08684	4.33508	4.61238	0.230156	3.67249	1.51214	19.0173	30.2319	21.7361	17.4141	10.6639	16.0695	19.9613	21.0918	19.4086
ENSAMEG00000000062	GL195044.1	+	40014	45949	894	1089	231	133	437	186	161	25	0	14	126	2646	810	381	557	2333	1209	397	462	195	568	92	508	20	196	37	71.4519	16.8413	9.02103	29.174	11.7444	9.65776	1.38392	0	0.983297	6.59108	216.003	67.3731	31.3702	41.2603	150.061	83.3968	33.7708	37.5774	14.9377
ENSAMEG00000000063	GL193810.1	-	413055	422034	2421	20	10	5	6	10	15	6	5	8	11	70	94	35	40	55	65	17	30	18	34	65	36	29	12	31	0.484573	0.269219	0.125233	0.147914	0.233163	0.332265	0.122649	0.111069	0.207486	0.212482	2.11014	2.88717	1.06415	1.09416	1.30635	1.65569	0.534001	0.901049	0.509173
ENSAMEG00000000064	GL195044.1	-	50278	50996	252	282	74	153	65	176	338	227	247	150	341	295	188	237	199	381	284	114	265	92	231	372	300	337	100	382	65.6405	19.1395	36.8157	15.3945	39.4246	71.929	44.5794	52.7126	37.3753	63.2816	85.4336	55.4749	69.2274	52.2958	86.9393	69.499	34.4027	76.4658	25.002
ENSAMEG00000000065	GL193810.1	+	426282	437559	2301	1591	573	960	753	957	1350	1118	432	797	749	2843	2472	2386	2161	2508	2570	1630	2155	2101	2049	2086	1817	1628	952	1535	40.5581	16.2307	25.2986	19.5313	23.4774	31.4634	24.0455	10.0968	21.7488	15.2226	90.1711	79.886	76.328	62.1946	62.6762	68.8775	53.8715	68.1009	62.5312
ENSAMEG00000000066	GL195044.1	-	60911	62628	1008	14	2	4	12	9	1667	1058	128	941	1400	2190	1785	1409	1917	3217	529	128	202	188	611	1115	1301	1537	366	1364	0.814688	0.129321	0.240625	0.710514	0.504007	88.6876	51.9438	6.82917	58.617	64.9518	158.559	131.679	102.892	125.944	183.519	32.3635	9.6569	14.5718	12.7728
ENSAMEG00000000067	GL195896.1	-	2296	4820	447	0	0	0	0	0	0	0	0	0	0	92	5	11	5	102	0	0	0	0	0	0	0	0	0	0	0	0	0	0	0	0	0	0	0	0	15.7981	0.874823	1.90517	0.779104	13.8008	0	0	0	0
ENSAMEG00000000068	GL196232.1	-	3407	6370	657	1	0	0	0	0	1	0	0	0	0	0	1	1	1	1	1	0	5	0	1	2	0	1	1	2	0.0892808	0	0	0	0	0.0816249	0	0	0	0	0	0.113181	0.112038	0.100797	0.0875238	0.0938632	0	0.553384	0
ENSAMEG00000000069	GL193955.1	-	24229	31392	1491	14	6	4	6	5	35	75	3	26	13	242	177	205	92	105	42	62	75	58	29	17	28	14	6	7	0.550775	0.262285	0.162676	0.240174	0.189299	1.25886	2.48939	0.108209	1.09494	0.407746	11.8453	8.82744	10.1206	4.08625	4.04952	1.73713	3.16229	3.65768	2.66402
ENSAMEG00000000070	GL193955.1	-	33678	34797	234	608	253	419	584	1175	139	223	198	185	214	1267	868	2166	2343	3634	2446	1424	3921	2006	5233	292	404	1018	548	573	154.389	71.3853	109.988	150.887	287.131	32.2694	47.7751	46.0969	50.2868	43.3237	400.287	279.413	690.203	671.699	904.617	652.988	468.798	1234.26	594.712
ENSAMEG00000000071	GL193955.1	-	42419	43980	585	4923	3314	2492	2613	2261	2318	1713	811	1191	1298	3216	2286	1501	1847	3181	4516	2206	2341	2751	3166	1401	1602	1376	640	825	493.626	369.23	258.306	266.585	218.172	212.493	144.914	74.5561	127.835	103.763	401.206	290.576	188.867	209.086	312.68	476.057	286.773	290.983	322.049
ENSAMEG00000000072	GL192507.1	+	224697	250135	1833	210	115	73	87	121	108	61	2	43	77	456	299	439	207	321	322	121	179	125	252	750	463	288	51	576	6.72017	4.08917	2.41492	2.83275	3.7263	3.15972	1.64693	0.0586794	1.47299	1.9645	18.1556	12.1296	17.6292	7.47863	10.0701	10.8331	5.02008	7.10089	4.6702
ENSAMEG00000000073	GL193955.1	-	48650	69989	2136	921	548	557	503	473	753	594	66	365	320	2250	2064	1482	1219	1484	1981	1439	1278	1443	1286	1181	1053	915	738	589	25.2919	16.7217	15.8123	14.0546	12.5001	18.9052	13.7624	1.66173	10.7297	7.00604	76.8756	71.8534	51.0713	37.7935	39.9507	57.1932	51.2327	43.5063	46.265
ENSAMEG00000000074	GL192507.1	+	352646	367370	2691	116	413	6	231	19	689	16	0	19	428	9	15	4	15	9	68	158	28	157	51	14	4	10	3	2	2.52853	10.0031	0.135201	5.12331	0.398561	13.7307	0.294249	0	0.443337	7.43796	0.244082	0.414492	0.109415	0.369141	0.192318	1.55832	4.4651	0.7566	3.99552
ENSAMEG00000000075	GL193955.1	-	102763	126925	2592	3593	2418	1808	1741	1550	1290	1209	53	696	533	2855	3513	2035	1826	1996	4072	1607	1898	1788	2309	2238	1936	1473	1687	1240	81.9108	61.2515	42.6089	40.3842	34.0053	26.8867	23.2539	1.10778	16.9849	9.68749	80.9792	101.526	58.2177	46.9976	44.608	97.5953	47.4968	53.6387	47.5899
ENSAMEG00000000076	GL193810.1	+	438749	443284	1902	1696	1043	1013	1098	905	613	511	54	384	235	1819	1999	1364	1593	1379	2189	1559	1276	1669	1532	1271	1709	974	1728	805	52.3045	35.7416	32.2954	34.4543	26.8592	17.2837	13.2959	1.52687	12.677	5.77805	69.7958	78.1522	52.7879	55.4651	41.6913	70.9735	62.3338	48.7823	60.0943
ENSAMEG00000000077	GL193810.1	+	454104	458070	1608	356	120	176	150	236	724	522	109	462	430	859	745	692	720	978	1164	490	491	533	900	712	957	732	544	529	12.9864	4.86402	6.63695	5.56746	8.28478	24.1457	16.0655	3.64551	18.0406	12.5056	38.9865	34.4516	31.6775	29.6525	34.9739	44.6404	23.1738	22.2033	22.7001
ENSAMEG00000000078	GL192507.1	-	371839	403811	2349	105	85	188	103	141	107	90	122	106	194	319	267	423	457	585	355	276	536	347	552	237	130	386	205	301	2.62198	2.3585	4.85308	2.61702	3.38837	2.4428	1.89613	2.79316	2.83346	3.86227	9.91094	8.45215	13.2552	12.8839	14.3207	9.31979	8.9354	16.5922	10.1166
ENSAMEG00000000079	GL192481.1	+	296087	508146	2997	7	7	40	18	15	7	15	0	9	8	64	46	56	49	66	28	19	86	10	20	26	18	61	33	15	0.137005	0.152234	0.809311	0.358458	0.282527	0.125256	0.247693	0	0.18856	0.124832	1.55848	1.14133	1.37541	1.08274	1.26634	0.576145	0.48212	2.08657	0.228508
ENSAMEG00000000080	GL192481.1	+	943852	945249	1128	0	0	0	0	0	0	0	0	0	0	0	0	0	0	0	0	0	0	0	0	0	0	0	0	0	0	0	0	0	0	0	0	0	0	0	0	0	0	0	0	0	0	0	0
ENSAMEG00000000081	GL192507.1	+	551366	699367	1947	10	13	4	13	4	9	5	0	12	7	12	25	6	14	2	21	18	2	11	13	36	9	13	2	17	0.320533	0.463012	0.132541	0.423979	0.123385	0.263742	0.135216	0	0.411741	0.178884	0.478561	1.01585	0.241341	0.50663	0.062845	0.707667	0.748014	0.0794696	0.411651
ENSAMEG00000000082	GL192481.1	-	997518	1251248	2604	267	240	340	292	345	200	237	814	280	342	397	368	773	652	740	470	462	767	627	745	384	450	654	521	603	6.01442	6.00718	7.91736	6.69259	7.47882	4.11886	4.50418	16.8113	6.75167	6.14199	11.1264	10.5086	21.8509	16.5814	16.3411	11.1306	13.4924	21.4179	16.4897
ENSAMEG00000000085	GL193955.1	+	175591	226939	2031	472	295	222	268	200	423	348	25	278	180	1494	1256	844	693	964	1060	854	670	862	830	611	486	471	363	421	13.6319	9.467	6.62804	7.87548	5.55872	11.1691	8.47965	0.661985	8.59467	4.14463	53.6844	45.9853	30.5888	22.5963	27.2935	32.1852	31.9769	23.9876	29.066
ENSAMEG00000000086	GL192481.1	+	349437	1942576	4332	26	16	15	44	22	21	22	15	21	26	30	34	72	65	65	327	74	92	136	461	56	51	142	42	80	0.340803	0.233038	0.203255	0.586829	0.277514	0.25166	0.243298	0.180267	0.29466	0.271709	0.489255	0.564969	1.18432	0.96191	0.835241	4.50625	1.25755	1.49492	2.08129
ENSAMEG00000000087	GL193810.1	+	464264	473735	2874	707	208	234	214	488	18	8	1	9	20	242	84	93	89	137	569	70	127	63	459	126	89	89	90	87	14.4297	4.71712	4.93709	4.44405	9.58491	0.335872	0.137756	0.0187125	0.19663	0.325437	6.14519	2.17336	2.38192	2.05077	2.7411	12.2092	1.85225	3.21321	1.50121
ENSAMEG00000000088	GL192507.1	-	698917	703769	504	12	5	10	10	8	71	65	4	74	39	49	173	65	200	62	46	41	73	52	48	139	66	134	40	122	1.39661	0.646606	1.20313	1.18419	0.896013	7.55467	6.38251	0.426823	9.21925	3.61874	7.09533	25.5243	9.49321	26.2793	7.0738	5.62844	6.18645	10.5321	7.06578
ENSAMEG00000000089	GL192507.1	+	772906	778546	888	76	11	7	53	10	188	144	6	121	165	44	94	14	71	56	175	29	18	13	146	2464	2675	2611	231	1903	5.02024	0.807384	0.477999	3.56217	0.635685	11.3536	8.02524	0.363376	8.55592	8.6895	3.61615	7.87143	1.1605	5.29492	3.62633	12.1531	2.48355	1.47395	1.00258
ENSAMEG00000000090	GL192507.1	-	787785	804842	1248	517	416	303	344	340	622	1001	51	713	417	1464	1562	925	1601	1562	1259	1311	917	1224	996	1041	869	1036	582	887	24.2996	21.726	14.7221	16.4511	15.3787	26.7278	39.6943	2.19773	35.8731	15.6259	85.6118	93.0691	54.5579	84.9554	71.9711	62.2117	79.887	53.429	67.1667
ENSAMEG00000000091	GL193955.1	-	208176	389381	1380	1202	1062	1524	1285	1205	337	223	196	227	294	330	222	446	275	446	380	148	367	217	437	323	589	467	471	379	51.0915	50.1586	66.965	55.5746	49.2905	13.096	7.99714	7.63828	10.3286	9.96304	17.4519	11.9622	23.7895	13.1968	18.5844	16.9811	8.15588	19.3379	10.7688
ENSAMEG00000000092	GL193955.1	+	234823	408623	1098	36	11	21	29	23	14	12	0	15	14	72	61	78	78	49	525	243	245	269	568	43	2	91	37	40	1.9232	0.652966	1.15974	1.57633	1.18244	0.683776	0.540863	0	0.857795	0.596279	4.78561	4.13111	5.22905	4.70443	2.56617	29.4861	16.8303	16.225	16.7779
ENSAMEG00000000093	GL193955.1	+	251240	255467	591	606	342	386	304	525	178	114	67	79	187	259	170	176	125	349	467	236	310	210	419	382	427	237	174	368	60.1463	37.7171	39.6043	30.7	50.1449	16.1518	9.5461	6.09685	8.39332	14.7971	31.983	21.3895	21.9208	14.0067	33.957	48.7293	30.3678	38.1414	24.3343
ENSAMEG00000000094	GL193955.1	+	261180	285200	3564	1591	653	506	481	581	59	49	3	36	34	1202	601	516	262	688	2112	1274	877	1148	1167	756	307	337	381	264	26.1852	11.942	8.60905	8.05489	9.20224	0.887774	0.680404	0.0452691	0.634248	0.446134	24.6135	12.5394	10.6572	4.86831	11.1005	36.5441	27.1844	17.893	22.0593
ENSAMEG00000000095	GL192507.1	-	819953	822689	537	101	19	61	35	41	267	205	24	142	99	232	211	120	156	221	1249	146	323	269	893	98	47	160	63	91	11.6393	2.43297	7.26698	4.10395	4.54696	28.1308	19.9317	2.53578	17.5172	9.0958	33.2642	30.825	17.3538	20.2965	24.967	151.323	21.8134	46.1431	36.1928
ENSAMEG00000000096	GL192507.1	+	841831	843252	444	1100	1074	635	1240	941	374	1399	1555	1232	223	981	1496	1051	1644	1268	1798	2810	1628	3396	1830	212	698	434	687	181	145.323	157.66	86.7227	166.683	119.636	45.1727	155.935	188.35	174.23	23.488	161.248	250.546	174.241	245.207	164.221	249.728	481.295	266.62	523.808
ENSAMEG00000000097	GL192507.1	-	847009	874375	1437	194	231	183	247	124	300	198	35	157	205	331	297	267	330	390	409	317	329	385	433	228	363	317	204	211	7.91897	10.4774	7.72212	10.2587	4.87102	11.1957	6.81894	1.30987	6.86021	6.67146	16.8104	15.3688	13.6768	15.208	15.6063	17.552	16.7761	16.648	18.3481
ENSAMEG00000000099	GL193182.1	-	93442	353396	891	0	0	0	0	0	0	0	0	0	0	0	0	0	0	0	0	0	2	0	0	0	0	0	0	0	0	0	0	0	0	0	0	0	0	0	0	0	0	0	0	0	0	0.16322	0
ENSAMEG00000000101	GL192507.1	+	878875	889551	600	6208	2910	2375	2777	3307	176	54	34	53	145	145	139	86	134	173	449	155	320	175	390	350	383	381	114	427	698.936	364.045	276.419	318.119	358.304	18.116	5.12938	3.50962	6.38752	13.0153	20.3113	19.8388	12.1504	17.0326	19.0941	53.1459	22.6247	44.6616	23.0032
ENSAMEG00000000102	GL193435.1	+	11721	52851	1911	1	4	2	5	0	3	0	0	2	2	30	104	61	84	37	31	14	22	17	31	3	3	2	6	3	0.0306947	0.136427	0.0634617	0.156157	0	0.0841877	0	0	0.0657149	0.0489433	1.14569	4.0468	2.34963	2.91094	1.11335	1.00037	0.557129	0.837113	0.609222
ENSAMEG00000000103	GL193182.1	-	396738	401628	393	393	62	225	82	339	549	385	783	199	1167	390	246	494	307	630	366	182	425	187	391	296	188	343	151	409	59.2607	10.3882	35.0732	12.581	49.1932	75.6851	48.9801	108.251	32.1217	140.296	73.1681	47.0245	93.4776	52.2641	93.1285	58.022	35.5803	79.4441	32.9215
ENSAMEG00000000104	GL193182.1	-	408798	435287	717	616	291	613	425	585	629	788	281	593	1087	553	452	814	780	956	690	471	914	586	1025	619	691	1088	487	1050	50.3947	26.4529	51.8422	35.3771	46.0566	47.0456	54.3896	21.0768	51.9314	70.898	56.2876	46.8768	83.5671	72.0427	76.6709	59.3459	49.9563	92.6935	55.9714
ENSAMEG00000000105	GL193182.1	+	463030	494090	1698	52	27	70	70	56	112	110	45	107	129	140	154	225	286	217	200	189	319	230	168	72	53	79	174	58	1.79634	1.0364	2.49978	2.46044	1.86168	3.53727	3.206	1.42526	3.95677	3.55284	6.01724	6.74407	9.75383	11.1543	7.34875	7.26362	8.46471	13.6608	9.27636
ENSAMEG00000000106	GL193435.1	-	63555	70699	1002	1139	816	958	969	727	427	822	238	826	391	682	825	692	861	823	502	353	280	415	436	96	125	183	235	104	66.6776	53.079	57.9749	57.7176	40.9564	22.8533	40.5988	12.774	51.7615	18.2487	49.6734	61.2245	50.8357	56.9049	47.2306	30.8956	26.7914	20.3195	28.364
ENSAMEG00000000107	GL192507.1	-	892701	914361	981	212	149	186	175	124	1509	422	580	216	1114	235	280	183	181	286	152	48	121	43	140	9597	12893	8179	1782	9198	12.6762	9.8996	11.497	10.6469	7.13522	82.4913	21.2888	31.7964	13.8254	53.1055	17.4826	21.224	13.7313	12.2187	16.7644	9.5551	3.72101	8.96889	3.00184
ENSAMEG00000000108	GL192507.1	-	915271	924052	1089	9203	4381	709	3192	1238	23	13	12	3	16	92	45	13	23	103	72	3	12	12	62	49	46	51	8	51	495.707	262.208	39.4785	174.939	64.1723	1.13263	0.590778	0.592614	0.172977	0.687093	6.16548	3.07272	0.87871	1.39867	5.43877	4.07723	0.209499	0.801264	0.754642
ENSAMEG00000000109	GL193182.1	+	533517	562288	3174	124	244	174	256	121	196	263	12	291	192	380	321	283	382	403	399	343	451	384	490	233	107	452	256	278	2.2916	5.01052	3.32418	4.81377	2.15196	3.31159	4.1007	0.203326	5.75679	2.8289	8.73743	7.52033	6.56311	7.97023	7.30113	7.75223	8.21817	10.3322	8.28537
ENSAMEG00000000110	GL193182.1	-	444382	829643	3381	38	84	34	62	44	4	0	0	0	3	1	0	2	2	2	33	64	22	45	35	63	39	84	18	71	0.645335	1.5851	0.596896	1.07133	0.719093	0.0621049	0	0	0	0.0406184	0.0211293	0	0.0426224	0.0383462	0.0332966	0.589186	1.40911	0.463151	0.892232
ENSAMEG00000000111	GL193435.1	-	103616	140660	1014	213	116	178	134	172	329	239	202	207	306	441	364	430	394	688	300	119	253	141	327	231	183	296	96	255	12.3215	7.45625	10.6445	7.88713	9.57515	17.3999	11.6646	10.7135	12.8182	14.1126	31.7401	26.6933	31.2148	25.7319	39.0159	18.245	8.92477	18.1428	9.52289
ENSAMEG00000000112	GL192507.1	-	926267	928305	693	879	362	268	274	390	316	256	469	132	98	904	555	342	266	656	544	200	217	223	251	310	501	257	132	181	74.4011	34.0467	23.45	23.5977	31.7677	24.4535	18.2817	36.3964	11.9601	6.61327	95.2012	59.5523	36.3265	25.4192	54.433	48.409	21.9475	22.7692	22.0373
ENSAMEG00000000113	GL192507.1	-	944841	1117883	438	28	64	9	30	7	230	20	7	13	83	191	167	85	119	103	176	77	64	44	69	105	215	45	64	58	4.31079	10.9485	1.43238	4.69946	1.03712	32.3736	2.59785	0.988078	2.14246	10.1877	36.586	32.5935	16.4219	20.6841	15.5455	28.4871	15.3693	12.2145	7.90888
ENSAMEG00000000114	GL192507.1	+	978318	1011674	3138	827	712	959	835	858	612	654	59	590	428	1655	1410	1595	1540	1782	989	1611	1678	1908	1242	740	666	1081	658	661	15.568	14.893	18.6622	15.9934	15.5434	10.5328	10.387	1.01829	11.8891	6.42347	38.7621	33.6481	37.6785	32.7294	32.8853	19.5731	39.3175	39.1576	41.9342
ENSAMEG00000000115	GL193435.1	-	148577	151330	720	54	23	55	16	39	67	43	13	41	60	131	104	108	86	122	125	96	124	115	115	80	49	89	41	53	4.53797	2.14769	4.77804	1.3681	3.15402	5.14763	3.04875	1.00163	3.68827	4.01994	13.6969	11.0794	11.3893	8.15938	10.0507	11.0437	10.4593	12.9178	11.2831
ENSAMEG00000000116	GL193435.1	-	165718	173080	1461	489	306	399	244	406	924	582	119	330	516	364	343	380	273	313	229	239	356	215	252	653	677	674	279	570	19.6328	13.6512	16.5602	9.96763	15.6867	33.9164	19.7143	4.38041	14.1827	16.5167	18.1827	17.4575	19.1454	12.3745	12.3193	9.66598	12.4404	17.7183	10.078
ENSAMEG00000000117	GL193435.1	+	173520	178491	1917	1454	1106	1004	1623	1280	2109	3100	77	2187	1625	2684	2894	1995	3392	3331	2814	2800	1878	3213	2487	2234	2221	2172	2742	2260	44.4904	37.6039	31.758	50.5299	37.6914	58.9987	80.0292	2.16017	71.6343	39.6419	102.18	112.257	76.6039	117.179	99.9181	90.5238	111.077	71.2354	114.783
ENSAMEG00000000118	GL193955.1	-	377599	380051	381	5	0	5	4	7	2	2	0	1	1	11	9	10	20	7	40	83	110	11	59	43	20	75	4	32	0.769784	0	0.795769	0.626595	1.03712	0.281509	0.259785	0	0.164805	0.122744	2.10705	1.75653	1.93199	3.47632	1.05649	6.47435	16.5669	20.9937	1.97722
ENSAMEG00000000119	GL193955.1	+	409440	412051	1410	200	58	93	85	78	36	39	1	49	35	197	353	219	235	158	2053	784	709	909	1493	244	39	213	125	146	9.44565	3.04373	4.5405	4.0846	3.5451	1.55442	1.554	0.0433009	2.47724	1.31786	11.5758	21.1345	12.9793	12.5303	7.31522	101.936	48.0046	41.5094	50.1222
ENSAMEG00000000120	GL195726.1	+	9492	10479	438	0	0	0	0	1	5	4	7	10	6	2361	474	1220	1293	4130	19	73	208	100	76	1	6	6	5	6	0	0	0	0	0.128879	0.612187	0.451954	0.859493	1.43357	0.64062	393.395	80.4717	205.029	195.496	542.21	2.6751	12.6747	34.5312	15.6356
ENSAMEG00000000121	GL196020.1	-	1093	10936	867	4	0	0	3	1	3	34	1	14	4	81	161	32	90	51	95	47	38	45	42	1	7	0	1	0	0.298892	0	0	0.228089	0.0719093	0.204946	2.14347	0.0685092	1.11983	0.238294	7.53048	15.2509	3.00062	7.59254	3.73587	7.46302	4.5532	3.51995	3.92582
ENSAMEG00000000122	GL194814.1	-	23355	31106	1101	428	122	219	113	308	781	359	94	260	448	595	625	585	462	569	540	313	445	319	477	998	751	826	325	843	22.8024	7.22225	12.0614	6.12552	15.7913	38.041	16.1367	4.59155	14.8279	19.0289	39.44	42.2116	39.111	27.7887	29.7178	30.246	21.6195	29.3897	19.8422
ENSAMEG00000000123	GL192507.1	-	1012686	1017807	1134	417	226	299	179	329	381	278	157	133	325	553	276	482	267	572	385	115	235	173	349	414	418	549	362	430	21.5698	12.9896	15.9882	9.42089	16.3771	18.0177	12.1322	7.44569	7.36433	13.4028	35.5893	18.0982	31.287	15.5924	29.0051	20.9367	7.7121	15.0687	10.4477
ENSAMEG00000000124	GL192389.1	-	101212	202151	1641	103	26	83	45	119	163	45	27	31	175	186	119	211	183	283	208	77	249	108	293	180	54	211	89	247	3.68173	1.03268	3.06699	1.63665	4.09349	5.32681	1.3571	0.884858	1.18617	4.98716	8.27202	5.39234	9.46464	7.38511	9.91675	7.81656	3.56837	11.0335	4.50716
ENSAMEG00000000125	GL193435.1	-	180217	203394	1056	345	218	459	240	331	153	117	79	107	152	295	174	316	310	441	188	283	379	322	282	238	143	341	148	353	19.1637	13.4553	26.3567	13.5644	17.6937	7.7699	5.48316	4.02329	6.3623	6.73137	20.3876	12.2525	22.0269	19.4407	24.0141	10.9788	20.3803	26.0974	20.8824
ENSAMEG00000000126	GL193404.1	-	493667	526009	2475	261	126	299	191	503	346	534	4	584	915	322	238	1070	20	405	416	128	357	92	599	116	372	519	4971	96	6.1857	3.31815	7.32552	4.60586	11.4722	7.49702	10.6776	0.0869167	14.816	17.289	9.49484	7.15057	31.8228	0.535142	9.40961	10.3652	3.93299	10.4885	2.54566
ENSAMEG00000000127	GL193435.1	+	224433	235651	1134	117	24	50	23	83	182	61	18	34	155	136	99	125	77	181	143	36	77	32	124	107	56	117	41	121	6.05197	1.37943	2.67362	1.21051	4.13162	8.60689	2.66211	0.853646	1.88261	6.39208	8.75252	6.49174	8.11386	4.49668	9.17819	7.77649	2.41422	4.93742	1.93252
ENSAMEG00000000128	GL194814.1	-	39099	64375	2196	175	121	175	113	167	112	122	22	92	74	484	640	500	716	528	511	433	457	432	555	518	263	583	166	618	4.68083	3.59623	4.83884	3.07533	4.29866	2.73884	2.75315	0.539514	2.63417	1.57804	16.107	21.701	16.7827	21.6216	13.8448	14.3695	15.0154	15.153	13.4906
ENSAMEG00000000129	GL192507.1	+	1021791	1028190	588	87	20	68	27	93	150	100	218	51	311	160	81	158	94	250	118	56	176	52	146	84	63	121	50	116	8.67892	2.21693	7.01251	2.74056	8.92813	13.6805	8.4165	19.9387	5.44612	24.7347	19.8586	10.2435	19.7793	10.5868	24.4486	12.3756	7.24267	21.7649	6.05639
ENSAMEG00000000130	GL193435.1	+	393049	452387	3849	56	33	55	96	108	36	54	14	50	42	130	102	90	175	112	277	77	76	120	201	302	193	285	1390	289	0.860351	0.56335	0.873512	1.50068	1.59677	0.505655	0.699949	0.197202	0.822297	0.514443	2.48493	1.98657	1.73515	3.0354	1.68684	4.47409	1.53371	1.44744	2.15245
ENSAMEG00000000131	GL192389.1	+	217494	256521	2334	0	0	1	0	0	2	0	0	0	3	6	3	9	4	12	0	5	1	2	1	7	3	10	0	14	0	0	0.0259801	0	0	0.0459533	0	0	0	0.0601096	0.187611	0.0955783	0.283839	0.113494	0.295646	0	0.162914	0.0311545	0.0586836
ENSAMEG00000000132	GL192507.1	-	1033392	1038862	765	2261	1422	1808	1815	1754	2722	2730	1096	1909	2623	2667	2391	2992	3448	3681	2959	1745	2120	1775	2889	4097	3705	4146	5491	4384	173.366	121.154	143.311	141.601	129.426	190.816	176.608	77.0491	156.689	160.347	254.43	232.411	287.893	298.483	276.692	238.531	173.469	201.51	158.9
ENSAMEG00000000133	GL192389.1	+	290048	400923	1482	185	395	155	584	140	0	39	0	30	1	155	267	188	136	101	884	373	417	275	302	31	93	41	248	22	7.32229	17.372	6.34199	23.5189	5.33255	0	1.30234	0	1.27106	0.0315555	7.63292	13.3968	9.3377	6.07722	3.91891	36.7845	19.1403	20.4602	12.7078
ENSAMEG00000000134	GL192507.1	+	1056074	1083847	3897	1097	1025	410	753	696	1900	731	20	511	882	1556	2027	690	1751	1424	994	1176	755	944	631	735	640	338	750	529	16.512	17.1433	6.37963	11.5323	10.0817	26.1463	9.28316	0.276006	8.23351	10.5843	29.1398	38.6778	13.0331	29.7557	21.0122	15.7296	22.9491	14.0877	16.5893
ENSAMEG00000000135	GL192389.1	+	447088	464468	972	3	0	0	7	0	4	0	3	1	9	120	58	287	123	229	39	13	59	11	58	4	10	23	2	6	0.181042	0	0	0.429817	0	0.220689	0	0.165987	0.0645993	0.433012	9.00994	4.43711	21.7343	8.38018	13.5476	2.47434	1.0171	4.41375	0.775022
ENSAMEG00000000136	GL193404.1	-	560975	707250	2946	146	63	101	69	146	0	0	0	0	6	3	1	3	1	1	15	14	0	8	13	5	12	6	0	11	2.9582	1.41838	2.11551	1.4225	2.84681	0	0	0	0	0.0969229	0.0756275	0.0256856	0.0762786	0.0228752	0.0198629	0.319524	0.367763	0	0.189247
ENSAMEG00000000137	GL192389.1	-	471214	490492	1839	0	0	3	7	1	1	2	0	1	5	51	17	89	55	131	36	4	54	9	65	2	5	20	2	10	0	0	0.0989195	0.227179	0.0306954	0.0291612	0.0538216	0	0.0341439	0.127149	2.02393	0.687395	3.56237	1.98059	4.0962	1.20721	0.165412	2.13518	0.335157
ENSAMEG00000000138	GL193435.1	-	486753	504953	1455	0	1	0	2	2	2	3	1	4	6	9	10	3	15	9	3	3	5	3	1	16	28	33	3	34	0	0.0447958	0	0.0820388	0.0775929	0.0737148	0.102039	0.036962	0.17262	0.192847	0.451426	0.511065	0.151771	0.68272	0.35569	0.127151	0.1568	0.249879	0.141204
ENSAMEG00000000139	GL192389.1	+	493321	532270	624	159	70	109	94	124	213	220	240	134	314	275	197	239	274	396	237	152	208	156	213	242	134	259	161	260	14.9464	7.31162	10.5921	8.99074	11.2174	18.3056	17.448	20.6845	13.4839	23.5325	32.1629	23.4758	28.1931	29.0791	36.4924	23.422	18.5245	24.2382	17.1209
ENSAMEG00000000140	GL192389.1	-	597820	619567	1818	68	44	23	112	59	38	78	2	66	37	1121	1496	488	1608	1530	202	141	110	108	166	113	131	318	682	93	2.19401	1.57746	0.767143	3.67685	1.83195	1.12093	2.12329	0.0591636	2.27953	0.951769	45.0006	61.1895	19.7586	58.5742	48.3937	6.85202	5.89812	4.39968	4.06834
ENSAMEG00000000141	GL192389.1	+	658751	670743	1344	19567	7480	7526	11589	10914	148037	94924	6359	76358	110820	10012	5697	3441	8687	12065	7137	1991	2690	1527	5823	15345	9317	35149	12673	16002	853.982	362.746	339.553	514.634	458.395	5906.89	3495.31	254.453	3567.38	3856.05	543.662	315.2	188.458	428.04	516.202	327.474	112.658	145.538	77.8085
ENSAMEG00000000143	GL192924.1	+	131802	133211	798	3844	2649	3483	2807	2579	8941	8818	7460	5820	9131	1445	1220	1875	1354	2285	1805	1308	1150	1490	1659	7174	9151	5760	3866	8160	282.556	216.361	264.663	209.938	182.433	600.857	546.86	502.753	457.946	535.105	132.151	113.683	172.953	112.365	164.655	139.487	124.65	104.789	127.871
ENSAMEG00000000144	GL193435.1	+	513062	515610	1443	160	39	152	67	172	171	106	166	88	378	247	165	288	199	359	179	136	312	195	221	227	220	401	117	444	6.50395	1.76156	6.38733	2.77115	6.72848	6.35503	3.63537	6.18671	3.82922	12.2504	12.4922	8.50269	14.6912	9.13274	14.3061	7.64976	7.16738	15.7221	9.25456
ENSAMEG00000000145	GL192924.1	-	180482	200626	669	644	255	709	213	449	161	184	430	136	153	356	210	333	234	395	277	183	374	226	315	290	329	349	128	352	56.4655	24.8436	64.2632	19.0023	37.8857	12.9059	13.6113	34.5669	12.7646	10.6952	38.8357	23.3417	36.6394	23.1635	33.9518	25.5337	20.8024	40.6507	23.135
ENSAMEG00000000146	GL192507.1	+	1130490	1173338	1476	19	12	28	27	29	49	19	3	23	50	128	109	160	185	227	148	94	182	134	173	48	34	130	114	73	0.755076	0.529901	1.15031	1.09177	1.10909	1.78032	0.637054	0.109308	0.978444	1.58419	6.32894	5.49135	7.97928	8.30041	8.84364	6.18353	4.84317	8.96617	6.21736
ENSAMEG00000000147	GL192389.1	-	675873	705172	1311	3	0	0	0	0	3621	77	74	48	2064	1	0	1	0	0	1	2	0	0	0	7	6	2	36	5	0.134228	0	0	0	0	148.12	2.90668	3.03562	2.29897	73.6259	0.0556678	0	0.0561471	0	0	0.047039	0.116015	0	0
ENSAMEG00000000148	GL194814.1	-	105993	109751	408	0	0	0	0	0	0	0	0	0	0	0	0	0	0	0	0	0	1	0	0	0	0	0	0	0	0	0	0	0	0	0	0	0	0	0	0	0	0	0	0	0	0	0.178222	0
ENSAMEG00000000149	GL194603.1	-	107005	115688	2352	1044	7534	1761	5872	476	362	9988	79	7494	209	3205	7542	1638	5395	2795	1821	16804	3204	17509	1155	851	2719	931	3734	574	26.0368	208.78	45.4009	149.005	11.4242	8.2539	210.16	1.80638	200.065	4.15559	99.4484	238.445	51.2633	151.904	68.3339	47.7456	543.33	99.0552	509.814
ENSAMEG00000000150	GL192507.1	+	1212722	1374848	4563	7	0	1	0	2	2	3	4	2	4	37	6	9	8	25	3	3	13	5	6	10	3	7	1	8	0.0899852	0	0.013289	0	0.024742	0.0235054	0.0325371	0.0471442	0.0275216	0.0409952	0.591777	0.0977777	0.145185	0.116106	0.315051	0.0405445	0.0499987	0.207164	0.0750425
ENSAMEG00000000151	GL193435.1	+	540381	541028	330	1	0	1	1	0	0	0	0	0	0	4	1	1	0	4	1	2	6	1	4	1	0	1	3	1	0.17775	0	0.18375	0.180858	0	0	0	0	0	0	0.884613	0.225333	0.223057	0	0.697008	0.186873	0.460897	1.32209	0.207526
ENSAMEG00000000152	GL192924.1	-	224565	227699	2073	82	125	44	121	41	89	99	18	122	106	114	78	104	84	122	58	86	81	93	83	78	72	100	80	80	2.32027	3.93017	1.28705	3.48368	1.11645	2.30239	2.36344	0.466973	3.69534	2.39128	4.0134	2.79791	3.69287	2.68345	3.38417	1.7254	3.15491	2.84124	3.07235
ENSAMEG00000000153	GL193435.1	+	600071	601294	408	0	0	0	1	0	0	0	0	0	0	3	0	0	0	4	0	0	0	0	0	0	0	0	0	0	0	0	0	0.146282	0	0	0	0	0	0	0.536622	0	0	0	0.563756	0	0	0	0
ENSAMEG00000000154	GL193435.1	-	634739	636118	345	0	0	0	0	0	0	0	0	0	0	0	0	0	0	0	0	0	0	0	0	0	0	0	0	0	0	0	0	0	0	0	0	0	0	0	0	0	0	0	0	0	0	0	0
ENSAMEG00000000155	GL193435.1	+	683848	688781	297	10	0	4	4	10	10	8	15	3	12	785	92	720	223	1791	151	47	215	89	247	6	6	8	8	3	1.975	0	0.816668	0.803814	1.90063	1.80564	1.33304	2.71615	0.634248	1.88951	192.895	23.0341	178.446	49.7236	346.761	31.3532	12.0345	52.6386	20.5221
ENSAMEG00000000156	GL192924.1	-	248719	309930	1368	33	12	15	50	19	322	193	51	151	206	1859	725	1586	1144	2340	345	287	409	313	367	312	200	372	46	264	2.09946	0.848302	0.986512	3.23662	1.16326	18.7289	10.3594	2.9748	10.2835	10.4486	147.148	58.4717	126.62	82.1693	145.941	23.0754	23.6722	32.2563	23.2488
ENSAMEG00000000157	GL192951.1	-	496240	698816	3894	73	60	73	41	85	53	37	1	35	90	175	85	112	116	229	135	118	204	91	196	189	37	303	65	268	1.11627	1.01947	1.15395	0.637907	1.25082	0.740944	0.477344	0.0140197	0.572907	1.0972	3.3294	1.6477	2.14916	2.0026	3.4328	2.17028	2.33933	3.867	1.62461
ENSAMEG00000000158	GL192389.1	-	712527	766322	1626	331	269	210	254	346	2566	2187	1187	1813	2817	736	362	611	405	1197	2030	975	809	1467	2215	3259	4973	4075	9056	3888	11.9407	10.7828	7.83143	9.32321	12.0119	84.6299	66.5636	39.2598	70.0119	81.0196	33.0342	16.5549	27.6599	16.4949	42.3317	76.9904	45.6008	36.1785	61.787
ENSAMEG00000000159	GL194453.1	-	24805	28693	786	166	30	44	29	131	152	52	2	47	73	292	219	243	194	290	422	68	139	89	352	193	96	150	22	149	12.3882	2.48771	3.39447	2.20205	9.40814	10.3707	3.27408	0.136844	3.75465	4.34334	27.1124	20.7186	22.7569	16.3453	21.2162	33.1094	6.57922	12.8592	7.75452
ENSAMEG00000000160	GL194453.1	-	31703	55508	2976	1250	1106	1736	1595	1114	1474	4278	1496	3008	1100	4665	5829	5259	7050	5211	4732	5020	5473	5685	4422	2598	2968	4358	3261	2383	24.6377	24.2227	35.3719	31.9875	21.1304	26.5615	71.1404	27.0344	63.4657	17.2856	114.4	145.647	130.077	156.881	100.688	98.0557	128.28	133.726	130.823
ENSAMEG00000000161	GL192924.1	+	374273	375394	759	13	4	2	2	1	8	3	2	0	1	46	31	13	12	39	52	4	4	3	23	52	33	20	2	28	1.00467	0.343493	0.159783	0.157268	0.0743726	0.565244	0.195609	0.141712	0	0.0616143	4.42306	3.0371	1.26076	1.04702	2.95471	4.22496	0.40078	0.383213	0.270687
ENSAMEG00000000162	GL192924.1	+	404995	410027	963	43	40	30	23	23	17	19	0	18	14	38	51	45	72	50	10	40	44	43	8	24	30	27	29	18	2.61918	2.70728	1.88902	1.42546	1.34821	0.946696	0.976418	0	1.17366	0.679869	2.87981	3.93806	3.43967	4.95131	2.98563	0.640375	3.1588	3.32237	3.05794
ENSAMEG00000000163	GL192924.1	-	428059	443051	1449	92	74	105	69	110	100	96	137	97	168	315	190	417	318	442	130	256	330	249	262	187	131	280	131	234	3.77113	3.37048	4.4493	2.87781	4.33918	3.74756	3.32002	5.14872	4.25624	5.49026	16.0649	9.87309	21.45	14.7164	17.7613	5.60228	13.6047	16.7686	11.9165
ENSAMEG00000000165	GL195184.1	-	56862	57874	966	0	0	0	0	0	0	0	0	0	0	0	0	0	0	0	0	0	0	0	0	0	0	0	0	0	0	0	0	0	0	0	0	0	0	0	0	0	0	0	0	0	0	0	0
ENSAMEG00000000166	GL195138.1	+	37239	62007	2154	41	45	80	70	42	73	52	58	59	91	169	171	157	264	228	151	217	177	253	240	75	44	192	126	148	1.11651	1.36165	2.25209	1.93957	1.10067	1.81746	1.19472	1.44811	1.71989	1.97569	5.72596	5.90323	5.36518	8.11657	6.08668	4.32307	7.66129	5.97516	8.04382
ENSAMEG00000000167	GL193759.1	+	198252	227273	816	121	128	100	116	138	94	151	36	92	127	412	393	540	527	516	593	407	541	422	649	325	238	620	157	398	8.69799	10.224	7.43108	8.48438	9.54649	6.17768	9.15789	2.37263	7.07933	7.27842	36.848	35.8131	48.7118	42.7696	36.3623	44.8152	37.9308	48.2091	35.4168
ENSAMEG00000000168	GL192389.1	+	798519	808631	1596	0	0	0	0	0	4	0	0	1	4	0	1	2	3	3	14	0	1	0	14	9	0	15	1	7	0	0	0	0	0	0.134405	0	0	0.0393425	0.117206	0	0.0465914	0.0922417	0.124481	0.108089	0.540949	0	0.0455606	0
ENSAMEG00000000169	GL192924.1	+	475943	481913	213	5292	4652	7312	4591	7383	1060	1875	2712	1174	2755	557	491	896	676	1439	747	491	1015	651	1068	1888	3061	2694	2229	3341	1457.35	1423.51	2081.61	1286.41	1956.63	266.879	435.643	684.744	346.085	604.875	190.846	171.412	309.641	210.175	388.484	216.273	175.303	346.504	209.309
ENSAMEG00000000170	GL193759.1	+	242730	249258	693	836	292	634	399	858	810	819	902	555	1393	1078	1051	1561	1520	1745	1683	1447	1673	1677	1949	887	1238	1053	782	1296	70.7614	27.4631	55.4751	34.3631	69.889	62.6815	58.487	69.999	50.2868	94.003	113.525	112.774	165.806	145.253	144.795	149.765	158.79	175.544	165.725
ENSAMEG00000000171	GL194453.1	+	61600	120149	5604	11	8	17	6	13	12	9	3	4	8	107	65	119	89	130	96	80	109	42	139	22	5	78	20	22	0.115138	0.0930448	0.183947	0.0639006	0.130948	0.114834	0.0794791	0.02879	0.0448184	0.0667599	1.39345	0.86249	1.56307	1.05173	1.33394	1.05641	1.08563	1.41433	0.513261
ENSAMEG00000000172	GL192924.1	+	492917	508984	435	0	1	7	1	5	1	0	7	2	4	8	1	7	7	9	24	15	62	4	35	3	4	5	4	9	0	0.149834	0.975778	0.137203	0.648837	0.123282	0	0.86542	0.288692	0.430026	1.34217	0.170942	1.18451	1.06567	1.18972	3.40238	2.62235	10.3639	0.629736
ENSAMEG00000000173	GL192924.1	-	511906	532785	1251	110	92	120	141	104	165	147	143	121	243	341	264	297	402	503	271	276	410	276	449	207	75	318	251	313	5.15773	4.79326	5.81656	6.72688	4.69279	7.07318	5.81525	6.14748	6.07327	9.08391	19.8932	15.6923	17.4755	21.2806	23.1208	13.359	16.778	23.8314	15.1091
ENSAMEG00000000174	GL192389.1	-	811471	930296	3180	91	34	15	105	66	118	222	56	169	84	2538	3986	1906	4342	2284	1348	1482	1233	1284	1130	76	140	148	152	61	1.67856	0.69687	0.286027	1.97067	1.17158	1.98995	3.45489	0.947064	3.33698	1.23531	58.2467	93.2071	44.119	90.4226	41.301	26.1411	35.4413	28.1941	27.6519
ENSAMEG00000000175	GL193759.1	-	253171	266551	387	799	368	462	333	604	734	896	1271	514	786	434	252	426	267	631	434	255	389	263	426	764	832	538	365	865	121.104	61.9779	72.3891	51.3553	88.101	101.712	114.579	176.625	83.3963	94.9807	81.8438	48.4204	81.0268	45.6893	93.7584	69.1576	50.1092	73.0905	46.5406
ENSAMEG00000000176	GL192794.1	+	27127	38400	1743	13	5	12	9	14	20	21	16	15	21	40	36	64	55	68	15	21	59	20	45	115	78	320	33	152	0.642416	0.274549	0.613017	0.452526	0.665782	0.903581	0.875543	0.724916	0.793478	0.827356	2.45933	2.25523	3.9688	3.0685	3.2942	0.779294	1.34542	3.61429	1.1539
ENSAMEG00000000177	GL193759.1	+	319639	382790	4284	34	14	22	47	35	36	39	11	49	25	227	127	201	260	309	310	248	267	379	383	63	46	157	81	115	0.465536	0.213	0.311398	0.654788	0.461183	0.450652	0.45053	0.13809	0.718193	0.272907	3.86708	2.20441	3.45364	4.01919	4.14764	4.46245	4.40241	4.53194	6.05867
ENSAMEG00000000178	GL192794.1	+	78787	96126	1458	8	1	3	0	9	4	0	0	1	6	11	7	11	6	7	16	10	23	5	17	7	0	24	6	16	0.321852	0.0447036	0.124769	0	0.34845	0.147126	0	0	0.0430662	0.19245	0.550608	0.357009	0.555348	0.272526	0.276078	0.676742	0.521592	1.14708	0.234855
ENSAMEG00000000179	GL192794.1	-	112552	116763	609	7	9	17	15	8	26	49	13	37	8	94	70	74	72	136	75	81	79	79	88	31	33	69	40	43	0.674224	0.96322	1.69268	1.47003	0.741528	2.28952	3.98187	1.14801	3.81486	0.614322	11.2646	8.54712	8.94427	7.82942	12.8414	7.5946	10.1148	9.43261	8.88377
ENSAMEG00000000180	GL192794.1	+	152814	176509	2418	796	681	278	766	395	969	1812	295	1074	514	3780	12976	3284	13622	3014	3728	6785	6240	4633	2027	954	1720	867	1442	621	19.3099	18.3565	6.97157	18.9071	9.22138	21.4909	37.086	6.56121	27.8896	9.94101	114.089	399.046	99.9717	373.077	71.6768	95.0781	213.394	187.651	131.218
ENSAMEG00000000181	GL192924.1	-	566759	579055	830	0	0	0	0	0	0	0	0	0	0	0	1	2	0	0	0	0	1	0	0	1	0	1	0	0	0	0	0	0	0	0	0	0	0	0	0	0.0895903	0.177371	0	0	0	0	0.087608	0
ENSAMEG00000000182	GL192924.1	-	580108	590640	555	1	0	0	0	0	0	0	0	1	0	0	0	0	0	0	0	3	2	1	0	3	1	1	0	0	0.105689	0	0	0	0	0	0	0	0.113136	0	0	0	0	0	0	0	0.411071	0.262035	0.123394
ENSAMEG00000000183	GL192924.1	-	712775	760394	1050	10	1	1	4	2	45	25	12	21	33	17	16	7	21	29	28	9	7	9	24	207	194	223	61	236	0.558643	0.0620742	0.0577501	0.227365	0.107522	2.29832	1.17831	0.614625	1.25581	1.46977	1.18159	1.1331	0.490726	1.32448	1.58818	1.64448	0.65184	0.484765	0.587003
ENSAMEG00000000184	GL194453.1	-	132942	136113	690	105	25	39	47	68	89	64	19	35	90	155	162	88	177	267	224	100	116	85	193	78	90	75	64	95	8.92614	2.36152	3.42734	4.06538	5.56307	6.91718	4.59028	1.48089	3.18503	6.09982	16.3942	17.4584	9.3878	16.9879	22.2512	20.0198	11.0215	12.2245	8.4364
ENSAMEG00000000185	GL192924.1	+	805869	822209	1222	7	21	98	1	0	0	2	0	0	0	0	0	0	1	0	23	5	1	6	24	0	0	0	0	1	0.336009	1.12008	4.86292	0.0488406	0	0	0.0809967	0	0	0	0	0	0	0.054193	0	1.16069	0.311162	0.0595046	0.336254
ENSAMEG00000000186	GL192507.1	-	1417859	1431640	1406	77	66	72	111	75	63	52	9	65	80	144	97	72	217	197	122	218	194	219	247	62	17	128	86	89	3.2124	3.05956	3.1052	4.71183	3.01114	2.40294	1.83032	0.344251	2.90284	2.6609	7.47454	5.13009	3.76945	10.2209	8.05699	5.351	11.7912	10.0332	10.6671
ENSAMEG00000000187	GL194453.1	+	137410	142702	1146	1878	1104	1310	760	887	1793	1369	206	820	898	2295	2893	1916	2139	1915	5236	1890	1583	2171	3149	1523	1372	1252	892	987	96.4613	63.0091	69.558	39.7191	43.8442	84.1981	59.3261	9.70107	45.086	36.7734	146.664	188.374	123.498	124.039	96.426	282.745	125.859	100.795	130.191
ENSAMEG00000000188	GL192507.1	+	1605620	1707645	2424	5	2	5	14	4	574	500	83	364	502	1278	783	1028	900	1653	422	112	698	156	224	26	5	48	13	31	0.120993	0.0537771	0.125078	0.344705	0.0931499	12.6989	10.2081	1.84147	9.42895	9.68489	38.4774	24.0197	31.217	24.5881	39.2132	10.736	3.51377	20.9385	4.40737
ENSAMEG00000000189	GL192794.1	+	181629	187753	657	10	9	5	16	10	406	543	216	462	258	35	86	25	56	47	27	15	27	19	32	41	79	70	28	60	0.892808	0.892848	0.461474	1.45347	0.859191	33.1397	40.9019	17.681	44.1541	18.3645	3.88785	9.73357	2.80095	5.64465	4.11362	2.53431	1.73626	2.98827	1.9805
ENSAMEG00000000191	GL192794.1	+	196024	206159	1254	60	59	18	55	36	7972	7465	516	6524	6359	6	31	12	19	18	191	96	120	71	180	3775	5514	3533	560	3787	2.80658	3.06658	0.870397	2.61768	1.62054	340.924	294.606	22.1294	326.671	237.146	0.349189	1.83824	0.704391	1.00339	0.825404	9.39283	5.82186	6.95834	3.87747
ENSAMEG00000000192	GL194303.1	+	10789	35327	1383	18	26	25	29	15	22	31	8	35	32	59	34	57	92	97	70	170	180	189	132	44	43	102	61	67	1.27056	2.03926	1.82424	2.08281	1.01893	1.41974	1.84616	0.517735	2.64461	1.80083	5.18153	3.0424	5.04899	7.33164	6.71216	5.19467	15.5574	15.7505	15.5757
ENSAMEG00000000193	GL194303.1	+	44094	45988	1791	8	6	24	26	13	20	16	13	19	44	69	49	92	74	109	62	169	167	216	145	38	24	66	31	65	0.26201	0.218351	0.812564	0.866423	0.409735	0.598856	0.442113	0.390361	0.66612	1.1489	2.81165	2.03441	3.78114	2.73622	3.49963	2.1348	7.17595	6.78021	8.25935
ENSAMEG00000000194	GL194303.1	-	70526	113845	3042	7	14	16	30	12	12	19	12	19	29	264	72	456	138	414	128	125	235	192	239	27	32	76	40	35	0.134978	0.299964	0.318936	0.588592	0.222678	0.211548	0.309103	0.212149	0.392183	0.445823	6.33362	1.76	11.0341	3.00424	7.82587	2.59485	3.12492	5.61734	4.32245
ENSAMEG00000000195	GL192507.1	+	1624583	1780480	1722	605	630	662	947	643	1700	2108	245	1458	2750	2356	1823	1745	2682	3721	2680	1946	2146	2100	3357	1526	834	2443	1577	2074	20.6085	23.8456	23.3113	32.8223	21.0782	52.9424	60.5824	7.65158	53.1641	74.6832	99.8503	78.7213	74.5921	103.143	124.256	95.976	85.9405	90.6189	83.5168
ENSAMEG00000000196	GL194453.1	-	144504	146574	861	271	126	125	131	145	474	389	100	190	395	1071	1035	849	772	1079	1084	781	736	859	836	499	552	290	206	459	18.4625	9.53823	8.80337	9.08072	9.50648	29.5232	22.3591	6.24619	13.8562	21.4545	90.7807	89.3874	72.583	59.3784	72.0626	77.6403	68.982	62.158	68.3247
ENSAMEG00000000197	GL192507.1	+	1789269	1906873	2952	19	16	14	28	15	12	0	8	1	17	4	32	6	42	18	5	7	10	6	10	17	13	17	3	28	0.377538	0.353268	0.287577	0.566101	0.286833	0.217998	0	0.145744	0.0212705	0.269312	0.0988896	0.80607	0.149612	0.942209	0.350629	0.104451	0.180331	0.246323	0.139195
ENSAMEG00000000198	GL192924.1	+	846318	848107	627	0	0	0	0	0	0	0	0	0	0	0	0	0	0	0	1	1	0	0	0	0	2	0	0	0	0	0	0	0	0	0	0	0	0	0	0	0	0	0	0	0.0983543	0.121289	0	0
ENSAMEG00000000199	GL192924.1	-	869587	894979	1248	723	741	1010	1256	765	7380	8553	794	7806	9445	1793	2432	2145	4084	2831	2946	2741	2516	3105	3618	8363	11381	12278	4826	13458	33.9819	38.6994	49.0737	60.0658	34.602	317.124	339.166	34.2156	392.743	353.925	104.851	144.907	126.515	216.713	130.442	145.572	167.025	146.595	170.386
ENSAMEG00000000200	GL194453.1	-	157021	159951	411	2611	1895	2821	2255	3138	2503	5229	6484	2708	4542	2328	2216	3189	2730	4242	2669	2063	3900	2146	2318	2611	5286	3071	5580	3397	372.639	300.516	416.201	327.459	430.989	326.593	629.63	848.437	413.715	516.808	413.379	400.928	571.141	439.881	593.5	400.468	381.721	689.993	357.582
ENSAMEG00000000201	GL192794.1	+	234630	236237	237	15	9	8	6	9	27	72	102	49	32	0	0	0	3	0	385	111	210	168	420	18	80	5	2	10	3.7125	2.47511	2.04684	1.51097	2.14363	6.10947	15.0346	23.1457	12.982	6.3143	0	0	0	0.838276	0	100.178	35.6174	64.4307	48.5454
ENSAMEG00000000202	GL194453.1	-	165787	172202	1743	280	196	275	205	181	216	240	26	192	121	1006	1076	688	878	759	566	740	860	669	460	550	367	523	200	323	9.42289	7.32924	9.56704	7.01954	5.86187	6.64575	6.81432	0.802222	6.91669	3.24647	42.1219	45.9043	29.055	33.3589	25.0401	20.0253	32.2866	35.8776	26.2855
ENSAMEG00000000203	GL192857.1	+	1000305	1021522	6621	6	0	0	6	5	7	6	16	4	3	405	176	859	266	538	240	114	393	165	395	23	10	85	8	7	0.0531559	0	0	0.0540854	0.0426286	0.0566973	0.0448473	0.129962	0.0379342	0.0211895	4.46415	1.97664	9.54992	2.66056	4.67251	2.23537	1.30939	4.3161	1.70666
ENSAMEG00000000204	GL192794.1	-	237946	244927	1599	34	6	6	90	67	13	3	0	6	17	88	34	34	20	59	19	11	5	3	7	8	10	5	28	4	1.24725	0.24457	0.227533	3.35928	2.36527	0.435996	0.0928499	0	0.235612	0.497192	4.01644	1.58114	1.56517	0.828316	2.12175	0.732767	0.523157	0.227375	0.128487
ENSAMEG00000000205	GL194453.1	+	171331	190736	1752	1682	1149	1283	1367	1450	1339	1346	1510	1121	1239	1115	1042	1080	1041	1482	1228	603	885	698	1168	1193	1768	1315	866	1298	56.3139	42.7451	44.4053	46.5679	46.7185	40.9859	38.0207	46.3512	40.1759	33.072	46.4459	44.2255	45.3753	39.3487	48.6414	43.224	26.1741	36.7309	27.284
ENSAMEG00000000206	GL192857.1	-	1034115	1075169	2166	148	178	98	305	100	54	389	34	214	65	809	1454	625	1896	837	827	1551	942	1387	959	176	146	171	485	115	4.00799	5.35626	2.74353	8.40414	2.60613	1.33697	8.88791	0.844187	6.20368	1.40339	27.2582	49.9166	21.2399	57.9688	22.2207	23.5455	54.4555	31.6238	43.8536
ENSAMEG00000000207	GL192389.1	+	944618	967852	1482	108	37	60	74	87	157	188	6	124	92	460	460	223	350	313	357	170	229	157	299	352	117	301	156	195	4.27464	1.62725	2.45496	2.98013	3.3138	5.68119	6.27796	0.217732	5.25373	2.90311	22.6525	23.0807	11.0761	15.6399	12.1447	14.8553	8.72346	11.2359	7.25503
ENSAMEG00000000208	GL194303.1	+	202435	275906	2544	7	4	7	5	11	1	3	0	0	4	4	11	5	7	6	32	22	39	25	36	28	6	17	18	7	0.1614	0.102481	0.166849	0.117302	0.244079	0.02108	0.0583597	0	0	0.0735303	0.114749	0.321525	0.144672	0.18222	0.135621	0.7757	0.657648	1.11473	0.672993
ENSAMEG00000000209	GL192389.1	+	1012964	1016746	732	0	1	1	0	4	0	0	0	0	0	0	0	0	0	1	0	1	0	1	0	0	0	0	1	0	0	0.0890408	0.0828383	0	0.308464	0	0	0	0	0	0	0	0	0	0.0785562	0	0.103891	0	0.093557
ENSAMEG00000000210	GL192924.1	-	940682	1007804	2981	90	75	185	157	114	138	195	253	151	286	479	453	619	711	937	528	414	741	483	828	415	252	1017	440	764	1.77094	1.63983	3.76315	3.14333	2.15873	2.48259	3.23729	4.56433	3.1806	4.48671	11.7268	11.2999	15.2848	15.7951	18.0746	10.9228	10.5615	18.075	11.0962
ENSAMEG00000000211	GL192386.1	-	340	1267	432	180	168	213	127	173	328	337	289	260	317	320	203	177	247	279	287	148	243	156	309	337	410	369	229	511	24.4406	25.347	29.8977	17.5458	22.6057	40.7172	38.606	35.9776	37.7906	34.3162	54.0597	34.9423	30.1592	37.8641	37.1375	40.9693	26.0535	40.902	24.7302
ENSAMEG00000000212	GL192794.1	+	250464	252982	279	7950	5535	6549	6892	6762	804	1077	1834	1076	997	785	406	795	461	1137	640	140	346	215	553	314	349	281	185	365	1671.42	1293.04	1423.35	1474.32	1368.13	154.54	191.038	353.52	242.16	167.115	205.339	108.208	209.746	109.424	234.341	141.461	38.1603	90.1766	52.7742
ENSAMEG00000000213	GL192386.1	+	26634	44489	504	98	33	50	25	84	234	98	106	60	230	317	136	218	179	406	234	49	147	59	191	144	99	154	66	164	11.4056	4.2676	6.01564	2.96048	9.40814	24.8985	9.62286	11.3108	7.47507	21.3413	45.9024	20.0654	31.8388	23.52	46.322	28.6316	7.39356	21.2084	8.01695
ENSAMEG00000000214	GL192389.1	-	1228536	1229325	765	0	0	0	0	0	0	0	0	0	0	0	0	0	0	0	0	0	0	0	0	0	0	0	0	0	0	0	0	0	0	0	0	0	0	0	0	0	0	0	0	0	0	0	0
ENSAMEG00000000215	GL192794.1	+	253466	262599	426	3	6	2	3	7	0	0	2	0	0	19	20	15	24	25	7	4	2	8	10	2	0	0	1	0	0.525291	1.16736	0.362016	0.534476	1.17953	0	0	0.321073	0	0	4.13919	4.4394	3.29592	4.74439	4.29128	1.28859	0.908036	0.434117	1.63543
ENSAMEG00000000216	GL192386.1	+	73459	141126	1725	18	22	6	4	3	6	13	0	6	2	32	13	7	14	29	8	15	11	20	10	11	1	11	5	11	0.612078	0.831254	0.210913	0.138396	0.0981719	0.186531	0.372961	0	0.218402	0.0542206	1.35384	0.560394	0.298703	0.537469	0.96672	0.285997	0.661287	0.463688	0.794014
ENSAMEG00000000217	GL192644.1	+	81742	139745	273	1	0	0	7	2	2	0	2	2	3	2	4	9	18	8	7	5	13	1	7	5	1	3	3	1	0.214863	0	0	1.53034	0.413545	0.392876	0	0.39399	0.460004	0.513904	0.534656	1.08952	2.42667	4.36641	1.68507	1.58123	1.39282	3.4626	0.250856
ENSAMEG00000000218	GL192644.1	+	387498	395974	396	18	8	0	10	42	0	0	0	0	0	1	0	2	0	1	0	0	0	0	1	1	0	1	0	1	2.66625	1.31672	0	1.50715	5.987	0	0	0	0	0	0.184294	0	0.371762	0	0.14521	0	0	0	0
ENSAMEG00000000219	GL192644.1	-	619031	623286	1317	0	0	0	0	0	0	0	0	0	0	0	0	0	0	0	0	0	0	0	0	0	0	0	0	0	0	0	0	0	0	0	0	0	0	0	0	0	0	0	0	0	0	0	0
ENSAMEG00000000220	GL192389.1	+	1420438	1521351	1302	122	19	65	24	155	256	130	90	116	177	179	261	114	257	281	104	9	40	16	111	72	77	83	238	80	5.49633	0.951136	3.02722	1.10015	6.7201	10.5443	4.9413	3.71749	5.59424	6.35749	10.0334	14.9063	6.44502	13.0718	12.4104	4.92587	0.525678	2.23394	0.841582
ENSAMEG00000000221	GL192794.1	+	263994	274372	540	327	157	181	319	257	163	184	51	195	146	1776	1528	1600	2079	2504	1408	743	1036	1182	1311	161	237	204	439	154	35.5204	18.9499	20.3248	35.2573	26.8655	16.1876	16.8629	5.07919	22.6744	12.6439	240.025	210.411	218.1	254.962	266.644	160.794	104.636	139.504	149.903
ENSAMEG00000000223	GL192389.1	-	1635572	1762779	2028	641	886	692	1087	618	119	215	15	201	104	1188	1149	628	1458	1496	2971	1289	1870	1676	2787	375	222	630	734	364	18.5402	28.4751	20.6909	31.99	17.2019	3.14678	5.24661	0.397779	6.22333	2.39822	42.7519	42.13	22.7941	47.6106	42.4185	90.3432	48.3363	67.0495	56.597
ENSAMEG00000000224	GL192794.1	-	311557	315080	1098	12	6	18	24	26	6	15	36	16	14	134	76	197	125	390	28	34	109	79	56	6	23	43	9	23	0.641066	0.356163	0.994059	1.30455	1.33668	0.293047	0.676079	1.76327	0.914981	0.596279	8.90655	5.14695	13.2067	7.53914	20.4246	1.57259	2.35486	7.21849	4.92734
ENSAMEG00000000225	GL192644.1	-	704129	1007887	932	0	0	0	0	0	0	0	0	0	0	0	1	0	1	0	0	6	2	0	3	7	2	15	1	7	0	0	0	0	0	0	0	0	0	0	0	0.0797853	0	0.0710556	0	0	0.48958	0.15604	0
ENSAMEG00000000226	GL194453.1	-	12686	225936	1074	0	0	1	0	0	231	489	1354	313	170	1	0	0	1	1	0	0	1	0	1	407	177	577	44	414	0	0	0.0407785	0	0	8.33084	16.2745	48.9695	13.2168	5.3464	0.049079	0	0	0.0445352	0.0386706	0	0	0.0489003	0
ENSAMEG00000000227	GL194285.1	+	4394	4926	432	25749	20989	28171	25168	23246	21467	37594	56467	26558	28300	16035	14434	28013	18479	26894	17678	9981	23053	14975	19732	11825	24185	22973	36487	15943	3496.23	3166.71	3954.22	3477.1	3037.52	2664.87	4306.69	7029.58	3860.17	3063.56	2708.9	2484.52	4773.16	2832.76	3579.84	2523.54	1757.03	3880.3	2373.94
ENSAMEG00000000228	GL192794.1	+	346393	360782	1947	184	83	130	117	75	4272	2186	93	1491	1922	2018	1132	1189	992	2059	4332	1992	1710	2554	2598	2126	2250	1880	434	1463	5.54339	2.77851	4.04874	3.58651	2.17445	117.667	55.5639	2.56883	48.0846	46.1648	75.6419	43.2334	44.9517	33.7412	60.811	137.209	77.8057	63.8634	89.8343
ENSAMEG00000000229	GL194285.1	-	6846	9642	957	980	593	582	514	550	609	478	94	306	462	655	593	613	655	722	1713	826	788	769	1636	2101	1693	1655	340	2030	60.0673	40.3871	36.8768	32.0556	32.4419	34.1266	24.7186	5.28244	20.0772	22.5763	49.9501	46.0767	47.1497	45.3256	43.3827	110.384	65.6381	59.8737	55.0303
ENSAMEG00000000230	GL194285.1	+	14201	26209	882	1455	1139	996	662	1010	793	517	52	355	359	1208	920	918	678	839	771	395	640	414	597	1735	1112	1163	434	1114	96.8748	84.2652	68.5529	44.8471	64.7143	48.2709	29.0418	3.17428	25.3015	19.0565	100.069	77.6517	76.7003	50.9645	54.7618	53.9684	34.0965	52.8234	32.1819
ENSAMEG00000000231	GL194495.1	-	113600	149692	1548	84	70	98	89	70	54	63	15	83	52	89	97	112	102	85	214	296	584	216	250	294	161	438	94	298	3.18297	2.94732	3.83882	3.4314	2.5526	1.87073	2.01409	0.521121	3.36668	1.57093	4.19591	4.6595	5.32571	4.36359	3.15747	8.52518	14.5415	27.4324	9.55587
ENSAMEG00000000232	GL194266.1	-	19431	167419	714	0	0	0	0	0	0	0	0	0	0	0	0	0	0	0	0	0	0	0	1	0	0	0	0	0	0	0	0	0	0	0	0	0	0	0	0	0	0	0	0	0	0	0	0
ENSAMEG00000000233	GL194266.1	+	236719	237535	777	0	0	0	0	0	0	0	0	0	0	0	0	0	0	0	0	0	0	0	0	0	0	0	0	0	0	0	0	0	0	0	0	0	0	0	0	0	0	0	0	0	0	0	0
ENSAMEG00000000234	GL192686.1	+	257151	726190	1911	22	13	15	9	10	13	35	2	20	20	197	190	158	177	254	283	148	207	148	231	28	32	49	58	13	0.782574	0.513834	0.551585	0.325742	0.342322	0.422776	1.0504	0.065227	0.761559	0.567196	8.71872	8.56785	7.05288	7.10832	8.85737	10.5834	6.82542	9.12792	6.14651
ENSAMEG00000000235	GL192794.1	+	362241	370743	981	7707	5114	3591	3495	3248	4037	7356	3628	3905	1802	4677	5486	3050	3933	4170	5703	2198	2556	2763	2805	3808	4459	2016	2775	2212	460.829	339.775	221.967	212.633	186.897	220.687	371.092	198.892	249.946	85.9032	347.941	415.839	228.855	265.503	244.432	358.505	170.391	189.458	192.885
ENSAMEG00000000236	GL194352.1	-	64908	195624	1572	41	44	27	16	40	22	19	46	12	19	59	44	68	78	111	39	35	46	43	69	78	74	86	56	100	1.52987	1.82432	1.04149	0.607463	1.43636	0.750513	0.598149	1.57371	0.479317	0.565229	2.73909	2.08132	3.1841	3.28592	4.06034	1.52993	1.69318	2.12778	1.87328
ENSAMEG00000000237	GL193811.1	-	42594	213285	2076	0	0	0	0	0	0	0	0	0	0	31	0	0	1	48	1	0	0	0	1	0	0	0	0	0	0	0	0	0	0	0	0	0	0	0	1.15135	0	0	0.0337017	1.40466	0.0313833	0	0	0
ENSAMEG00000000238	GL194495.1	-	154626	163967	1983	735	526	463	573	475	660	601	237	540	431	1769	1557	1021	1373	1566	1409	1447	1241	1254	1189	936	760	1017	653	685	21.7414	17.2887	14.158	17.2458	13.5215	17.8488	14.9989	6.42753	17.0988	10.1643	65.1047	58.3855	37.8995	45.8524	45.411	43.8177	55.4925	45.5063	43.3074
ENSAMEG00000000239	GL194285.1	+	36160	43033	1383	919	657	905	776	713	1172	1776	55	1447	915	2255	2742	2434	3414	2807	3078	1860	2341	1967	2857	2389	2448	2725	1399	2462	38.9778	30.963	39.6797	33.4882	29.102	45.4458	63.552	2.13874	65.6963	30.9402	118.996	147.429	129.547	163.477	116.711	137.248	102.277	123.084	97.4024
ENSAMEG00000000240	GL192686.1	+	931895	992546	2646	310	173	226	288	280	297	318	19	271	257	444	457	458	492	507	2521	769	1325	1151	2408	869	467	881	1147	838	6.8722	4.26144	5.17918	6.49613	5.97342	6.01942	5.94766	0.386173	6.43093	4.54221	12.2462	12.843	12.7411	12.3137	11.0182	58.7549	22.1016	36.4123	29.7902
ENSAMEG00000000241	GL193504.1	+	12925	30259	510	39	44	29	44	37	21	72	4	45	38	49	82	63	99	82	43	66	69	66	78	19	34	56	53	31	4.48557	5.62319	3.44802	5.14914	4.09531	2.20819	6.98668	0.421802	5.54034	3.48447	7.01186	11.9559	9.09286	12.8552	9.24561	5.19947	9.84151	9.83787	8.8626
ENSAMEG00000000242	GL193504.1	+	137514	391848	662	22	21	25	43	13	7	31	3	37	18	34	42	32	64	54	34	27	42	57	46	13	14	36	39	18	1.94934	2.06758	2.28994	3.8767	1.10851	0.567059	2.31746	0.243715	3.50944	1.27156	3.74824	4.7177	3.55813	6.4023	4.69059	3.16725	3.10166	4.61332	5.89664
ENSAMEG00000000243	GL193504.1	+	446237	482304	1068	93	67	73	110	96	36	83	42	92	59	108	137	116	218	137	85	126	240	154	138	44	78	121	116	51	5.10782	4.08887	4.14471	6.14715	5.07405	1.80767	3.84606	2.11493	5.40892	2.58348	7.38005	9.53868	7.99497	13.5176	7.37634	4.90804	8.97196	16.3404	9.875
ENSAMEG00000000244	GL192794.1	+	373432	374637	249	3	1	20	96	87	15988	158000	100159	226567	31697	0	1	7	53	0	7	60	57	169	71	2	47	14	34	67	0.706717	0.261759	4.87049	23.0104	19.7231	3443.36	31402.7	21632.6	57133.6	5953.09	0	0.298634	2.06933	14.0958	0	1.73364	18.3248	16.6455	46.4809
ENSAMEG00000000245	GL192794.1	+	380852	391433	1872	0	0	0	0	1	952	3662	374	2666	677	1	3	6	6	4	4	2	0	1	1	6	1	0	4	0	0	0	0	0	0.0301543	27.2721	96.8102	10.7444	89.4229	16.9124	0.0389853	0.119167	0.235926	0.212256	0.12287	0.13177	0.0812479	0	0.0365832
ENSAMEG00000000246	GL192857.1	+	201131	1210295	690	0	0	0	0	1	0	0	1	0	0	0	7	2	0	3	0	0	0	0	1	875	534	533	131	1481	0	0	0	0	0.0685059	0	0	0.0652666	0	0	0	0.631698	0.178662	0	0.209356	0	0	0	0
ENSAMEG00000000247	GL193537.1	-	533247	619027	1002	0	0	0	2	0	4	5	1	1	2	0	0	1	0	2	0	0	0	0	0	1	4	4	0	3	0	0	0	0.119128	0	0.214082	0.246951	0.0536724	0.0626652	0.0933439	0	0	0.073462	0	0.114777	0	0	0	0
ENSAMEG00000000248	GL193504.1	-	484829	485277	297	2183	4912	1136	3940	858	1774	7282	2525	3425	858	938	12273	1766	5059	650	4655	12426	5657	12221	1432	1541	6245	1559	3277	698	431.143	1077.96	231.934	791.757	163.074	320.321	1213.4	457.218	724.1	135.1	230.491	3072.79	437.688	1128.03	125.849	966.549	3181.73	1385.01	2817.98
ENSAMEG00000000249	GL193504.1	-	517033	651318	6837	279	207	291	302	299	236	277	27	373	289	1041	693	1223	920	1321	604	759	1002	777	905	339	225	694	375	459	2.39366	1.97335	2.58089	2.63629	2.46866	1.85112	2.00504	0.212381	3.42561	1.97677	11.112	7.53714	13.1671	8.91121	11.1104	5.44794	8.44237	10.6567	7.78293
ENSAMEG00000000252	GL193097.1	+	28756	84314	624	27	10	12	20	36	1	0	2	0	0	5	6	36	3	25	22	20	25	40	22	1	2	2	2	5	2.53807	1.04452	1.16611	1.91292	3.25666	0.0859416	0	0.172371	0	0	0.58478	0.714999	4.24667	0.318384	2.30381	2.1742	2.43744	2.91325	4.38998
ENSAMEG00000000253	GL195265.1	-	46018	56492	354	0	0	0	1	0	0	0	0	0	0	7	7	0	3	5	1	13	8	0	1	0	1	2	0	0	0	0	0	0.168597	0	0	0	0	0	0	1.44312	1.47039	0	0.561219	0.812191	0.174204	2.79273	1.64327	0
ENSAMEG00000000254	GL192523.1	-	364614	434567	1575	142	56	181	56	139	162	186	77	132	379	105	76	140	92	173	160	75	279	61	221	222	214	451	141	363	5.28849	2.31744	6.96851	2.12207	4.98183	5.51598	5.84442	2.62923	5.26245	11.2534	4.86537	3.58816	6.54301	3.86831	6.31622	6.2647	3.62134	12.8809	2.65239
ENSAMEG00000000255	GL192913.1	+	33441	57279	574	243	193	293	256	387	342	336	544	355	704	198	140	401	256	412	204	156	260	173	367	209	335	491	378	510	24.8324	21.9152	30.9527	26.6183	38.0587	31.9523	28.9692	50.9689	38.8339	57.3567	25.1745	18.1366	51.4236	29.5354	41.274	21.9169	20.6681	32.937	20.6406
ENSAMEG00000000256	GL192507.1	+	1916278	1923367	429	4	0	0	0	9	0	0	0	0	0	0	0	0	0	0	0	0	0	0	0	0	1	0	2	1	0.546923	0	0	0	1.18424	0	0	0	0	0	0	0	0	0	0	0	0	0	0
ENSAMEG00000000257	GL192386.1	-	150680	164211	2181	11	4	0	2	5	26	6	2	0	8	53	45	22	37	35	42	17	27	3	21	10	7	3	2	6	0.295843	0.119538	0	0.0547301	0.12941	0.639301	0.136146	0.0493165	0	0.171537	1.77348	1.53425	0.742501	1.12347	0.922792	1.18756	0.592763	0.900182	0.0942005
ENSAMEG00000000258	GL192913.1	+	144419	314988	2298	233	133	244	244	263	313	327	256	282	545	783	582	820	1222	1248	830	986	1289	1152	1367	384	233	699	500	539	5.94743	3.77226	6.43846	6.33712	6.46042	7.30436	7.04217	5.99112	7.70537	11.091	24.8667	18.8327	26.266	35.2156	31.2289	22.2735	32.6298	40.7873	34.3313
ENSAMEG00000000259	GL194495.1	-	165638	186279	2463	634	321	555	349	460	494	557	361	486	315	2202	2025	2003	1749	2134	1444	1375	1819	1412	1308	895	938	976	657	758	15.099	8.49456	13.6638	8.45694	10.5426	10.756	11.1918	7.88245	12.3899	5.98094	65.2469	61.1364	59.8614	47.0262	49.8221	36.1546	42.4548	53.702	39.2607
ENSAMEG00000000260	GL192523.1	-	459026	460702	924	0	0	2	1	2	4	29	1	23	14	5	17	1	30	3	2433	4918	655	3318	1483	213	632	337	28	105	0	0	0.13125	0.0645922	0.122184	0.232154	1.55323	0.0582031	1.56297	0.708565	0.394916	1.36809	0.0796633	2.15012	0.186699	162.379	404.767	51.5456	245.919
ENSAMEG00000000261	GL193097.1	-	93304	145591	2994	266	170	263	302	275	235573	79090	35757	51850	285600	558	481	747	629	970	451	460	544	465	557	739	1125	912	2800	1038	5.21139	3.70081	5.32655	6.02015	5.18485	4219.51	1307.31	642.285	1087.41	4460.98	13.6016	11.9463	18.3653	13.9128	18.6299	9.28936	11.6841	13.212	10.6363
ENSAMEG00000000262	GL192686.1	+	1008466	1022014	540	910	513	581	438	665	1080	918	938	522	1515	528	400	458	477	779	797	304	720	374	956	958	815	842	574	1145	98.8488	61.919	65.2416	48.4097	69.5157	107.255	84.1313	93.4173	60.6975	131.203	71.3587	55.0814	62.4312	58.4977	82.9536	91.0176	42.8122	96.9529	47.4313
ENSAMEG00000000263	GL192523.1	-	514734	553149	2484	217	136	260	165	228	188	142	14	173	217	667	512	438	661	739	495	491	755	558	772	272	80	479	227	294	5.12427	3.56851	6.34693	3.96446	5.18129	4.05877	2.82908	0.303106	4.37309	4.08537	19.5966	15.327	12.9793	17.6224	17.1074	12.2889	15.032	22.1013	15.384
ENSAMEG00000000264	GL192507.1	-	1925264	1970059	1643	0	0	0	0	0	1	0	0	0	0	5	1	1	1	1	0	0	0	1	0	0	2	0	0	0	0	0	0	0	0	0.03264	0	0	0	0	0.222095	0.0452586	0.0448015	0.0403067	0.0349989	0	0	0	0.0416821
ENSAMEG00000000265	GL194285.1	+	44199	49265	1344	2268	1336	1606	1643	1609	1869	2625	332	1983	1253	4429	4706	4396	5381	4563	5610	5127	5462	5670	4806	3768	4036	3590	3104	3466	98.9846	64.7899	72.4584	72.9609	67.579	74.5758	96.6582	13.2849	92.6441	43.5989	240.499	260.37	240.762	265.142	195.228	257.409	290.103	295.512	288.916
ENSAMEG00000000266	GL192386.1	-	196912	199130	504	2335	2291	519	2054	347	163	2228	390	1195	68	1391	4065	570	2756	1354	893	5525	518	3979	510	120	1320	221	1335	109	271.757	296.275	62.4423	243.233	38.8646	17.3438	218.773	41.6152	148.878	6.3096	201.42	599.748	83.2482	362.129	154.483	109.265	833.662	74.7345	540.668
ENSAMEG00000000267	GL192913.1	-	628364	638906	1335	2	0	0	0	3	3	0	3	1	4	110	25	178	34	130	23	1	18	3	55	6	3	3	3	5	0.0918677	0	0	0	0.132613	0.125985	0	0.126342	0.0491704	0.146485	6.2865	1.45575	10.2603	1.7632	5.85388	1.1107	0.0595521	1.02495	0.160886
ENSAMEG00000000268	GL192386.1	-	263182	268023	540	2547	1401	1390	1767	2075	1447	1874	1075	1200	1939	4217	4454	3863	5002	5112	2477	4287	3975	3447	2552	2193	1991	2242	2201	2433	276.668	169.1	156.086	195.297	216.91	143.702	171.745	107.061	139.535	167.922	569.924	613.332	526.576	613.429	544.363	282.874	603.737	535.261	437.155
ENSAMEG00000000269	GL192794.1	+	410706	418995	2553	2	6	6	9	6	140	238	24	213	83	2476	2490	2804	2321	1961	243	136	357	140	266	4	4	8	11	9	0.0459518	0.153179	0.142509	0.210399	0.132665	2.9408	4.61355	0.505567	5.2387	1.52038	70.7794	72.525	80.8458	60.2058	44.1691	5.86971	4.05113	10.1681	3.75547
ENSAMEG00000000270	GL192686.1	-	1025036	1048953	2484	185	73	213	105	164	264	200	318	190	381	501	281	470	448	771	438	345	606	338	616	254	157	404	195	382	4.36861	1.91545	5.1996	2.52284	3.7269	5.69955	3.98462	6.88484	4.80282	7.17294	14.7195	8.41189	13.9276	11.9438	17.8482	10.8739	10.5622	17.7396	9.31864
ENSAMEG00000000271	GL194435.1	+	108255	111380	336	0	1	1	2	0	11	7	20	1	16	526	43	347	152	1237	29	9	114	27	73	2	4	13	5	4	0	0.193982	0.180469	0.355257	0	1.75566	1.03102	3.20117	0.186877	2.22692	114.249	9.5163	76.0187	29.9584	211.701	5.32255	2.037	24.6711	5.50316
ENSAMEG00000000272	GL194365.1	+	69881	243211	1908	277	184	88	87	77	71	27	22	19	27	1172	605	424	265	513	756	532	332	565	313	60	37	38	92	14	8.79228	6.48957	2.88751	2.80976	2.35203	2.06037	0.723054	0.640234	0.645574	0.683259	46.2842	24.344	16.8886	9.49638	15.9627	25.2279	21.8926	13.0635	20.9379
ENSAMEG00000000273	GL194285.1	+	50902	56819	1050	742	432	564	569	593	774	809	761	595	610	1280	1226	1126	1015	1191	897	702	949	810	799	921	978	764	580	775	41.4513	26.816	32.5711	32.3426	31.8801	39.5312	38.1301	38.9775	35.5813	27.1684	88.9667	86.8241	78.9368	64.0164	65.225	52.6822	50.8436	65.7202	52.8303
ENSAMEG00000000274	GL192386.1	+	312703	346197	1413	135	125	150	187	133	124	188	100	163	113	491	448	635	763	646	559	757	818	833	946	183	133	372	205	239	5.60422	5.76591	6.43712	7.89863	5.3133	4.70617	6.58452	3.80606	7.24336	3.7399	25.3598	23.5763	33.0797	35.7599	26.2895	24.3967	40.742	42.0953	40.3729
ENSAMEG00000000275	GL192523.1	-	616456	633291	1013	2486	8271	671	7080	1280	2013	8782	191	4009	995	2290	14135	1217	7870	1412	4564	15214	3874	12194	2473	2111	16070	750	8158	1163	143.951	532.168	40.1657	417.134	71.3272	106.567	429.035	10.1401	248.497	45.9343	164.981	1037.59	88.4324	514.493	80.1525	277.841	1142.15	278.082	824.374
ENSAMEG00000000276	GL192374.1	+	104136	121699	582	14	12	24	23	46	9	0	0	10	13	154	25	52	47	240	54	32	66	32	87	19	19	41	16	32	1.41101	1.34387	2.50052	2.35861	4.46159	0.829292	0	0	1.07888	1.04459	19.311	3.19415	6.57674	5.34797	23.7126	5.72179	4.18134	8.24599	3.76543
ENSAMEG00000000277	GL192523.1	+	1076462	1455895	1716	209	184	146	214	204	419	92	68	60	421	116	130	156	152	160	139	152	196	169	173	2269	1898	2076	521	3379	7.14418	6.98877	5.15915	7.44301	6.7107	13.0944	2.65326	2.13113	2.19547	11.4733	4.93342	5.63333	6.69172	5.86598	5.3616	4.99526	6.73619	8.30541	6.74461
ENSAMEG00000000278	GL192374.1	-	131389	423656	1977	0	0	0	0	1	6	39	0	33	10	0	0	1	5	0	248	299	142	326	332	86	44	159	7	113	0	0	0	0	0.0285528	0.162754	0.976262	0	1.0481	0.236547	0	0	0.0372326	0.167486	0	7.73581	11.5015	5.2228	11.2927
ENSAMEG00000000280	GL194495.1	+	202088	214212	768	7	3	19	9	19	4	2	5	9	2	16	9	39	13	42	14	14	28	17	29	23	9	43	11	26	0.534639	0.254601	1.50015	0.699413	1.39652	0.27931	0.128878	0.350128	0.735827	0.121785	1.52043	0.871405	3.73795	1.12098	3.1447	1.12416	1.38629	2.65106	1.51592
ENSAMEG00000000281	GL194285.1	+	69951	82384	5646	579	310	277	168	296	368	173	9	111	137	1494	753	535	375	735	833	349	370	301	555	646	219	379	111	290	6.01536	3.57866	2.97496	1.77591	2.95941	3.49538	1.5164	0.0857275	1.23446	1.13476	19.3115	9.91729	6.97498	4.3985	7.4858	9.0984	4.70081	4.76522	3.65101
ENSAMEG00000000282	GL192913.1	-	675620	838187	2400	636	698	744	893	576	216	144	38	175	328	456	498	431	654	628	636	422	406	457	735	147	73	198	273	192	15.5442	18.9559	18.7977	22.2071	13.5477	4.82648	2.96934	0.851512	4.57848	6.39126	13.8663	15.4297	13.2189	18.046	15.0467	16.3421	13.3718	12.3009	13.0404
ENSAMEG00000000283	GL192686.1	+	1038372	1336587	1002	1	0	0	0	0	1	2	0	3	0	1	2	0	2	0	2	1	3	0	1	0	1	0	0	0	0.0585404	0	0	0	0	0.0535205	0.0987804	0	0.187996	0	0.0728349	0.148423	0	0.132183	0	0.12309	0.0758963	0.217709	0
ENSAMEG00000000284	GL192686.1	+	1057592	1093106	666	1	2	2	0	1	0	1	0	1	5	3	6	1	1	6	3	5	16	2	2	5	2	13	0	4	0.0880743	0.195729	0.182095	0	0.084758	0	0.0743078	0	0.0942801	0.351091	0.328741	0.669909	0.110524	0.0994352	0.518046	0.277784	0.570931	1.7469	0.205657
ENSAMEG00000000285	GL192523.1	+	1496242	1557528	2320	3	2	1	2	1	164	323	90	201	368	32	19	26	35	44	67	140	100	83	110	245	137	470	85	376	0.0758502	0.0561878	0.0261369	0.051451	0.0243314	3.79091	6.89006	2.08628	5.44004	7.41794	1.00663	0.608982	0.824927	0.999066	1.09058	1.78093	4.58911	3.13425	2.45006
ENSAMEG00000000287	GL192389.1	-	1847611	1867312	660	265	573	413	863	210	108	400	1275	329	125	511	523	886	911	768	570	954	961	1087	679	347	638	650	756	321	23.5519	56.5862	37.9445	78.0403	17.961	8.77542	29.9933	103.893	31.3001	8.85706	56.5046	58.9246	98.8144	91.409	66.9128	53.2588	109.924	105.877	112.791
ENSAMEG00000000288	GL192686.1	+	1120324	1327506	2859	5	2	4	1	5	42	76	50	95	37	5	8	15	16	10	17	17	63	6	35	9	20	40	10	26	0.102584	0.0455949	0.0848375	0.0208756	0.0987213	0.787813	1.31555	0.940533	2.08643	0.605217	0.127633	0.208073	0.386196	0.370613	0.20113	0.366687	0.452192	1.60232	0.143722
ENSAMEG00000000289	GL192794.1	+	447391	449985	1044	0	0	0	0	1	2	1	0	1	2	2	4	5	7	1	4	3	4	1	9	1	0	2	0	0	0	0	0	0	0.0586177	0.111376	0.0513904	0	0.0652031	0.0971242	0.151569	0.308868	0.382185	0.481378	0.0597125	0.25615	0.23691	0.302034	0.071115
ENSAMEG00000000290	GL192794.1	+	482030	483138	1011	45	7	5	25	33	44	41	51	18	55	425	946	689	1655	540	2554	1601	1214	1647	1636	38	46	47	28	26	2.61087	0.451281	0.299889	1.47585	1.84254	2.33394	2.00697	2.71292	1.11793	2.54411	30.6793	69.5791	50.1647	108.408	30.7139	155.787	120.428	87.3152	111.566
ENSAMEG00000000291	GL194467.1	-	5851	44683	1338	0	0	0	0	0	0	0	0	0	0	24	4	6	5	23	11	1	5	0	7	24	14	12	5	22	0	0	0	0	0	0	0	0	0	0	1.80384	0.306323	0.454844	0.341008	1.36207	0.698609	0.0783193	0.374432	0
ENSAMEG00000000292	GL192794.1	-	511595	514473	309	0	0	0	0	0	0	1	0	0	0	0	0	0	4	3	0	0	0	0	0	0	2	0	1	0	0	0	0	0	0	0	0.162259	0	0	0	0	0	0	0.868509	0.565605	0	0	0	0
ENSAMEG00000000293	GL194105.1	+	8137	58334	3981	29	4	3	1	18	12	2	0	2	12	38	17	24	27	51	37	24	56	16	41	37	8	17	7	39	0.427297	0.0654889	0.0456953	0.014992	0.255232	0.16165	0.0248626	0	0.0315451	0.140965	0.696624	0.317538	0.443761	0.449144	0.736664	0.573153	0.458466	1.02286	0.275242
ENSAMEG00000000294	GL194467.1	-	64093	106378	2151	2	23	4	18	9	4	18	0	19	7	13	24	10	15	22	170	77	88	102	186	140	87	207	24	155	0.0545398	0.696928	0.112762	0.499441	0.236188	0.0997258	0.414134	0	0.554635	0.152188	0.441072	0.829678	0.342208	0.461812	0.588131	4.87382	2.72232	2.97485	3.24749
ENSAMEG00000000295	GL194105.1	-	61153	77027	1524	377	389	505	636	406	365	437	307	445	261	456	747	768	1335	853	612	917	814	1253	675	622	780	858	725	880	14.5104	16.6366	20.0932	24.9072	15.0382	12.8439	14.1907	10.8336	18.3345	8.00902	21.8367	36.4481	37.0942	58.011	32.1852	24.7644	45.7586	38.8384	56.3059
ENSAMEG00000000296	GL194365.1	-	167974	171799	420	517	291	428	324	458	307	397	567	245	404	296	257	279	254	416	369	149	300	200	362	392	694	434	388	609	72.2046	45.159	61.7926	46.0413	61.5561	39.1992	46.7789	72.6026	36.6278	44.9838	51.4339	45.5012	48.8973	40.0497	56.9555	54.1799	26.979	51.9391	32.6113
ENSAMEG00000000298	GL192794.1	-	524205	536933	1632	0	0	0	0	0	0	4	0	2	1	20	19	36	8	36	1	0	5	0	3	0	1	0	1	0	0	0	0	0	0	0	0.121297	0	0.0769492	0.0286552	0.894369	0.86571	1.62373	0.324627	1.26845	0.0377868	0	0.222778	0
ENSAMEG00000000299	GL192686.1	-	1376501	1573564	4077	379	364	446	348	226	299	358	13	334	209	450	324	368	369	512	1483	613	822	695	1588	531	292	655	439	562	5.45283	5.81917	6.6334	5.09437	3.12912	3.93295	4.34561	0.171483	5.14399	2.39734	8.05525	5.9094	6.64412	5.99377	7.22139	22.4317	11.4343	14.6606	11.6743
ENSAMEG00000000300	GL192386.1	-	355038	366070	1260	176	116	185	293	189	387	245	102	184	242	595	572	505	779	817	829	783	598	997	966	300	146	351	426	317	8.19343	6.0005	8.90314	13.8787	8.46732	16.4713	9.62286	4.35359	9.16942	8.98191	34.463	33.757	29.502	40.9431	37.2858	40.5737	47.2584	34.5106	54.1891
ENSAMEG00000000301	GL192779.1	+	141674	143896	1578	15	5	22	12	25	31	11	20	10	41	69	38	61	73	133	92	41	72	46	135	50	24	96	11	51	0.557581	0.206521	0.845391	0.453865	0.89431	1.05352	0.34498	0.681618	0.397912	1.21507	3.19116	1.79067	2.84546	3.06359	4.84659	3.59535	1.9759	3.31778	1.99636
ENSAMEG00000000302	GL192389.1	-	1922572	2000920	1530	612	502	707	769	572	371	610	351	764	445	664	712	931	1303	1094	658	1130	1000	1363	912	399	474	744	949	629	25.2628	23.0255	30.1695	32.2987	22.7225	14.0013	21.2444	13.2841	33.7593	14.645	34.1021	37.2585	48.2265	60.7246	44.2706	28.5557	60.4745	51.1715	65.6885
ENSAMEG00000000303	GL192779.1	+	154231	174698	1722	185	215	191	292	236	1557	834	39	561	2259	299	238	302	386	477	427	549	525	762	521	829	2280	2595	962	1220	6.30177	8.13777	6.72578	10.1205	7.73631	48.489	23.9685	1.21801	20.4562	61.3489	12.672	10.2774	12.9093	14.8446	15.9286	15.2917	24.2453	22.1691	30.3047
ENSAMEG00000000304	GL193308.1	+	763446	779609	1014	0	0	0	0	0	0	3	23	0	5	0	0	0	0	0	0	0	0	1	0	1	2	10	0	1	0	0	0	0	0	0	0.146417	1.21986	0	0.230598	0	0	0	0	0	0	0	0	0.0675382
ENSAMEG00000000305	GL195289.1	+	34124	35032	894	0	0	0	0	0	0	0	0	0	0	0	0	0	0	0	0	0	0	0	0	0	0	0	0	0	0	0	0	0	0	0	0	0	0	0	0	0	0	0	0	0	0	0	0
ENSAMEG00000000307	GL192726.1	+	226378	904213	4704	141	100	73	87	164	163	88	13	51	112	601	687	437	677	677	1167	315	504	387	993	428	230	410	173	286	1.75823	1.38558	0.941018	1.10383	1.96803	1.85827	0.925815	0.148626	0.680765	1.11346	9.32426	10.86	6.83824	9.53094	8.27586	15.299	5.0925	7.79086	5.63419
ENSAMEG00000000308	GL195289.1	+	51462	52717	876	0	0	0	0	0	0	0	0	0	0	0	0	0	0	0	0	0	0	0	0	0	0	0	0	0	0	0	0	0	0	0	0	0	0	0	0	0	0	0	0	0	0	0	0
ENSAMEG00000000309	GL194105.1	+	142737	173213	1362	165	110	244	187	138	266	294	133	250	341	481	430	577	649	801	550	422	654	524	705	638	384	1263	336	841	7.10609	5.264	10.8631	8.19439	5.71948	10.4735	10.6826	5.25161	11.5254	11.7085	25.7736	23.4763	31.1838	31.556	33.8179	24.9027	23.5626	34.9159	26.3476
ENSAMEG00000000310	GL192810.1	-	33929	63675	1488	0	0	0	0	0	5	10	5	11	1	0	0	0	0	0	40	57	41	0	16	6	2	9	0	2	0	0	0	0	0	0.187509	0.346077	0.188041	0.483004	0.032703	0	0	0	0	0	1.72498	3.03129	2.08483	0
ENSAMEG00000000311	GL192507.1	+	2008010	2059003	1608	14	0	5	1	4	119	3	10	1	95	1538	502	1529	622	2044	87	24	167	31	109	778	449	744	62	968	0.5107	0	0.18855	0.0371164	0.14042	3.9687	0.0923302	0.334451	0.0390489	2.76287	69.8035	23.2144	69.9925	25.6164	73.0948	3.33652	1.13505	7.55184	1.32027
ENSAMEG00000000312	GL194365.1	+	171786	196379	1569	145	106	98	114	111	564	371	13	283	276	449	742	443	494	344	512	394	457	462	367	281	436	249	240	200	5.42087	4.40335	3.78744	4.33645	3.99351	19.2772	11.702	0.445593	11.3255	8.2264	20.8848	35.1658	20.7831	20.8506	12.6074	20.1237	19.0968	21.1795	20.1654
ENSAMEG00000000314	GL194613.1	+	16919	25410	1608	17	4	0	2	5	4	1	0	0	0	17	5	0	1	6	122	6	2	1	54	19	4	11	3	9	0.620135	0.162134	0	0.0742328	0.175525	0.133402	0.0307767	0	0	0	0.77156	0.231219	0	0.041184	0.214564	4.6788	0.283761	0.0904411	0.0425894
ENSAMEG00000000315	GL192913.1	-	869948	1149532	3033	143	167	186	219	171	1208	3379	424	2873	1736	70	31	20	39	78	153	129	148	149	215	378	129	329	199	432	3.24363	4.20909	4.36141	5.05438	3.7327	25.0511	64.6649	8.81771	69.7592	31.3939	1.9755	0.891399	0.569288	0.998735	1.73443	3.64858	3.79358	4.16155	3.94589
ENSAMEG00000000316	GL192438.1	-	954139	1315514	3051	11	5	2	9	6	1551	639	197	519	945	9	5	0	4	5	7	6	20	9	6	8	6	3	2	1	0.21176	0.106954	0.0398015	0.176288	0.111156	27.2978	10.3786	3.47706	10.6952	14.5038	0.215564	0.122022	0	0.0869364	0.0943603	0.141673	0.14975	0.477287	0.202282
ENSAMEG00000000317	GL192386.1	+	449009	456583	1278	0	0	1	0	0	115	71	6	83	98	47	22	39	18	48	43	6	19	16	38	20	8	44	1	15	0	0	0.0474473	0	0	4.82564	2.74939	0.252487	4.07795	3.58607	2.68395	1.28006	2.24628	0.93273	2.15974	2.07491	0.357033	1.08105	0.857386
ENSAMEG00000000318	GL192810.1	-	96080	358442	1410	0	0	1	2	0	0	0	1	0	0	0	1	1	0	0	0	0	0	0	0	1	4	0	2	1	0	0	0.0671513	0.132189	0	0	0	0.0595567	0	0	0	0.0823476	0.0815159	0	0	0	0	0	0
ENSAMEG00000000319	GL192794.1	+	543872	746524	7878	1101	605	652	519	599	558	727	28	550	207	3580	3553	2104	2428	2445	2753	2517	1962	2790	1662	1505	1157	1126	976	811	8.19776	5.00541	5.0185	3.93191	4.29206	3.79845	4.56696	0.191144	4.3837	1.22879	33.1645	33.5365	19.6589	20.4102	17.8466	21.5502	24.2972	18.1094	24.2536
ENSAMEG00000000320	GL192810.1	-	680487	1077852	273	0	0	0	0	0	0	0	0	0	0	2	0	0	0	0	0	0	0	0	0	0	0	0	0	0	0	0	0	0	0	0	0	0	0	0	0.534656	0	0	0	0	0	0	0	0
ENSAMEG00000000321	GL192810.1	+	762360	773644	462	19	11	7	12	27	296	118	102	98	333	42	36	87	45	84	55	39	80	33	68	100	57	120	62	103	2.41232	1.55185	0.918752	1.55021	3.29896	34.3588	12.64	11.8734	13.3192	33.7075	6.63459	5.79428	13.8614	6.45037	10.4551	7.34145	6.41964	12.5913	4.8917
ENSAMEG00000000322	GL192726.1	-	1170927	1240942	1371	48	43	91	47	69	142	112	151	111	251	122	137	192	329	236	143	134	216	133	242	78	51	172	97	113	2.05365	2.04424	4.02482	2.04603	2.84097	5.55442	4.04286	5.92322	5.0837	8.5617	6.49426	7.43057	10.3085	15.8918	9.89843	6.4322	7.43285	11.4561	6.64357
ENSAMEG00000000323	GL194613.1	-	29560	38376	879	1	42	0	80	1	138	80	17	62	70	11	29	14	27	17	189	283	58	323	159	602	376	223	308	358	0.0667321	3.1143	0	5.43192	0.0642194	8.41934	4.50412	1.04011	4.42891	3.7242	0.913295	2.45329	1.17238	2.03418	1.11212	13.2597	24.4842	4.79801	25.1652
ENSAMEG00000000324	GL192810.1	-	777522	782837	1029	12	3	16	7	22	22	22	12	23	33	42	38	32	50	51	34	14	53	18	34	27	14	30	7	34	0.684053	0.190023	0.942859	0.406008	1.20687	1.14656	1.05807	0.627168	1.40348	1.49976	2.9788	2.74604	2.2891	3.21787	2.85001	2.03763	1.03467	3.74527	1.19797
ENSAMEG00000000325	GL192810.1	+	789406	802713	870	258	77	167	97	229	432	270	276	192	439	317	198	341	258	387	288	64	297	83	286	263	147	423	137	275	17.395	5.76862	11.6396	6.65433	14.8584	26.6288	15.3587	17.0611	13.8572	23.5977	26.5918	16.9233	28.8513	19.6388	25.579	20.4143	5.59434	24.8233	6.53351
ENSAMEG00000000326	GL192389.1	+	2193845	2377074	1728	53	40	61	92	67	0	0	0	5	0	5	8	26	2	2	19	9	18	18	13	30	42	11	601	4	1.7991	1.50875	2.14056	3.17758	2.1887	0	0	0	0.181686	0	0.211171	0.344259	1.10754	0.076648	0.0665546	0.678064	0.396084	0.757445	0.713372
ENSAMEG00000000327	GL192374.1	+	508828	510998	228	427	171	308	227	433	682	854	1177	634	1423	699	460	946	719	1335	608	356	904	425	836	731	755	965	411	1235	109.854	48.8834	81.914	59.4214	107.203	160.412	185.367	277.626	174.602	291.873	223.743	150.024	305.412	208.837	336.696	164.448	118.742	288.307	127.656
ENSAMEG00000000328	GL192374.1	+	706976	732408	738	709	562	879	783	662	212	442	286	337	352	1751	1408	2182	2872	2613	1414	1624	2246	1969	1976	837	793	1802	962	1319	56.3525	49.6341	72.2229	63.3224	50.6357	15.4052	29.6398	20.8415	28.6727	22.3054	173.156	141.868	217.635	257.717	203.599	118.155	167.347	221.297	182.716
ENSAMEG00000000329	GL192779.1	-	176540	229689	3495	293	194	300	254	296	610	403	329	437	659	962	806	1116	1144	1279	927	817	1046	872	1414	1078	1032	2431	611	1572	4.9175	3.61788	5.20495	4.33749	4.78079	9.35989	5.70646	5.06252	7.85107	8.81783	20.0879	17.1485	23.5043	21.6767	21.0434	16.3566	17.7772	21.7624	17.0866
ENSAMEG00000000330	GL192630.1	+	141891	437243	1281	0	3	0	2	9	63	1	7	1	80	1	0	1	2	1	403	428	266	445	632	69	10	138	3	94	0	0.160537	0	0.098002	0.41711	2.77384	0.0406314	0.309079	0.0515522	3.07161	0.0599183	0	0.0604342	0.108742	0.0472111	20.4042	26.723	15.8802	25.0207
ENSAMEG00000000331	GL192386.1	+	495073	505257	1947	0	0	0	0	0	0	3	0	4	0	1	0	0	0	0	1	10	9	4	0	0	1	1	10	0	0	0	0	0	0	0	0.0762542	0	0.129	0	0.0374836	0	0	0	0	0.0316734	0.390591	0.336123	0.140696
ENSAMEG00000000332	GL192810.1	+	823931	891396	5938	13	0	0	1	12	5	0	0	0	3	14	0	1	0	12	15	1	1	0	20	8	2	0	0	5	0.128418	0	0	0.0100511	0.114076	0.0451562	0	0	0	0.0236268	0.172066	0	0.0123962	0	0.116207	0.15578	0.012807	0.0122457	0
ENSAMEG00000000333	GL194105.1	+	110445	334429	3555	454	343	421	529	325	419	438	127	365	223	1016	836	895	872	1093	967	633	864	925	937	600	424	764	467	568	5.98842	5.02721	5.7406	7.09971	4.12545	5.05283	4.87434	1.53587	5.15371	2.3451	16.6738	13.9791	14.8145	12.9856	14.1333	13.4097	10.8249	14.1276	14.245
ENSAMEG00000000334	GL192386.1	-	512211	554607	1704	3	1	2	8	2	0	0	0	0	0	1	7	3	4	2	19	40	14	50	9	2	3	14	7	1	0.10327	0.0382499	0.0711709	0.280203	0.0662545	0	0	0	0	0	0.042829	0.305469	0.129593	0.155455	0.067492	0.687614	1.78517	0.597421	2.0095
ENSAMEG00000000335	GL192438.1	-	1530503	1620043	1491	1	0	0	0	0	48	1	24	1	39	6	12	8	8	9	0	0	6	10	10	4	4	6	3	5	0.0393411	0	0	0	0	1.72644	0.0331918	0.865669	0.0421131	1.22324	0.293684	0.59847	0.39495	0.355326	0.347102	0	0	0.292614	0.459314
ENSAMEG00000000336	GL192386.1	-	590473	619568	3621	414	543	484	760	310	272	525	49	414	157	852	1838	1278	1706	881	1813	2477	1696	2864	1519	652	846	1071	5408	490	6.71948	9.79291	8.12081	12.551	4.84204	4.03616	7.18919	0.729166	7.19294	2.03159	17.2052	37.8178	26.0299	31.2612	14.0178	30.9365	52.1226	34.124	54.2716
ENSAMEG00000000337	GL194613.1	-	78636	81887	270	820	526	437	831	526	629	631	523	581	518	1197	923	939	1260	1608	1944	1138	1054	1765	1806	749	658	726	972	736	178.145	126.976	98.1431	183.692	109.971	124.932	115.658	104.173	135.116	89.7201	323.547	254.201	255.995	309.045	342.463	444.011	320.528	283.857	447.681
ENSAMEG00000000338	GL192630.1	+	609283	711850	2094	93	136	126	200	160	137	211	113	236	220	245	251	286	335	353	320	427	379	427	521	287	224	594	404	390	2.60513	4.23314	3.64868	5.7004	4.31319	3.50858	4.98671	2.90215	7.07668	4.91326	8.53879	8.91325	10.0536	10.5945	9.6937	9.42398	15.5074	13.1609	13.9649
ENSAMEG00000000339	GL192549.1	-	204898	452825	3744	210	287	165	341	144	242	454	24	336	127	1019	1133	656	1649	984	641	2079	531	1949	667	503	311	362	573	349	3.29008	4.99627	2.67233	5.43589	2.17111	3.46631	6.00107	0.344742	5.63505	1.58632	19.863	22.5026	12.8973	29.1675	15.113	10.558	42.2286	10.3129	35.6503
ENSAMEG00000000340	GL194613.1	-	116634	138624	1125	1331	586	682	509	733	1389	1573	1368	915	850	1362	1256	1036	1119	1390	1819	912	1337	1186	1254	1668	2042	1287	597	1422	69.5839	34.0412	36.8582	27.0755	36.8779	66.3892	69.3816	65.571	51.2062	35.4283	88.5913	83.2407	67.9669	66.0468	71.2383	99.9771	61.8145	86.6484	72.3901
ENSAMEG00000000341	GL193097.1	-	168699	196716	1887	1	1	3	4	4	16053	13049	357	7253	17275	7	3	13	5	2	2	3	8	2	7	4	11	7	29	4	0.0310851	0.0345405	0.0964032	0.126514	0.119658	456.218	342.227	10.1745	241.346	428.124	0.270728	0.118219	0.507109	0.175474	0.0609466	0.065361	0.120903	0.308276	0.0725848
ENSAMEG00000000342	GL192523.1	-	1571281	1607422	1509	1	2	2	9	6	1032	519	174	472	1325	21	5	25	5	21	33	7	8	6	66	159	110	119	69	259	0.0388718	0.0863855	0.080368	0.355963	0.224449	36.6757	17.0211	6.20124	19.6403	41.063	1.01563	0.246388	1.2195	0.21943	0.800243	1.34861	0.352774	0.385499	0.272301
ENSAMEG00000000343	GL194467.1	-	150033	170032	1119	305	366	403	279	340	496	275	182	227	420	193	170	257	223	292	191	166	173	251	237	394	403	430	354	422	15.988	21.3182	21.8382	14.8808	17.1516	23.7706	12.1622	8.74701	12.7377	17.5527	12.5873	11.2969	16.9057	13.1974	15.0053	10.526	11.2815	11.2419	15.3614
ENSAMEG00000000344	GL192507.1	-	2160104	2176797	1152	41	11	24	37	25	84	72	15	61	83	88	69	63	101	107	64	128	65	110	64	36	21	46	77	47	2.08764	0.622358	1.26328	1.91691	1.22502	3.91034	3.09306	0.700256	3.32485	3.36937	5.5749	4.45385	4.02549	5.80608	5.341	3.42601	8.44978	4.10282	6.53925
ENSAMEG00000000345	GL192726.1	+	735709	1426182	2970	465	234	367	327	416	316	352	323	300	425	817	751	949	1032	1034	705	800	952	857	846	349	397	658	502	437	8.71151	4.87117	7.10764	6.23328	7.50007	5.41242	5.56376	5.54802	6.01634	6.34789	19.0435	17.8359	22.3107	21.8278	18.9902	13.8857	19.431	22.1094	18.745
ENSAMEG00000000346	GL192389.1	-	2664472	2711020	3051	0	2	6	5	4	0	3	3	6	9	73	18	82	30	68	17	19	42	20	55	0	5	4	14	5	0	0.0427256	0.119248	0.0978092	0.074007	0	0.0486617	0.0528807	0.123482	0.137951	1.74617	0.438702	1.97834	0.651168	1.28162	0.343611	0.473587	1.00099	0.448927
ENSAMEG00000000347	GL192794.1	-	544502	547403	693	0	0	0	0	0	0	0	0	0	0	8	19	7	68	7	0	0	0	0	0	1	0	1	0	0	0	0	0	0	0	0	0	0	0	0	0.842488	2.03873	0.743524	6.49815	0.58084	0	0	0	0
ENSAMEG00000000348	GL192374.1	+	880593	895278	1911	1638	1642	2446	3125	1547	6261	6881	9565	6963	5891	10355	8189	19503	13371	17486	4988	5317	5935	6557	6346	3491	5258	7333	10313	4443	50.2779	56.0032	77.6136	97.5981	45.6967	175.7	178.197	269.18	228.786	144.162	395.454	318.646	751.227	463.359	526.164	160.963	211.589	225.83	234.981
ENSAMEG00000000349	GL192794.1	+	551482	560389	1308	10	0	6	3	5	9	5	0	6	12	27	12	24	9	33	30	9	12	9	26	13	4	26	6	5	0.448452	0	0.278154	0.136888	0.215783	0.368997	0.189178	0	0.28803	0.429039	1.50648	0.682201	1.35062	0.455669	1.45077	1.41441	0.523266	0.667107	0.471218
ENSAMEG00000000350	GL192667.1	+	25146	28074	294	1426	456	1146	1255	1545	1244	2022	11426	2133	1503	1818	1177	3460	2326	3608	5890	2047	4862	4016	7599	1747	2203	2754	2218	2720	284.509	101.092	236.363	254.77	296.644	226.914	340.363	2090.09	455.552	239.076	451.288	297.693	866.282	523.934	705.685	1235.46	529.491	1202.51	935.479
ENSAMEG00000000351	GL192507.1	-	2192148	2217160	1182	0	0	0	0	0	0	0	0	0	0	0	0	3	0	0	0	0	0	0	0	0	0	0	0	0	0	0	0	0	0	0	0	0	0	0	0	0	0.186825	0	0	0	0	0	0
ENSAMEG00000000352	GL193097.1	+	231863	297009	4554	277	177	341	280	342	559	421	289	361	689	840	490	1108	730	1134	479	681	656	707	672	410	366	560	802	571	3.56788	2.53326	4.5405	3.66959	4.23924	6.58274	4.57507	3.4129	4.97747	7.07538	13.4615	8.00096	17.9092	10.6156	14.319	6.48639	11.3721	10.4745	10.632
ENSAMEG00000000353	GL194285.1	-	94331	96687	540	816	687	1089	1052	1014	357	411	750	417	383	422	360	615	457	845	562	256	578	409	705	582	972	683	827	827	88.638	82.9207	122.286	116.272	105.998	35.4538	37.6666	74.694	48.4883	33.1687	57.0329	49.5733	83.8324	56.045	89.9818	64.1805	36.0524	77.8316	51.8701
ENSAMEG00000000354	GL192507.1	-	2235718	2237310	357	0	0	0	0	0	0	0	0	0	0	0	0	0	1	0	0	0	1	0	0	0	0	0	0	0	0	0	0	0	0	0	0	0	0	0	0	0	0	0.185501	0	0	0	0.203683	0
ENSAMEG00000000355	GL192667.1	+	92679	159316	698	68	48	64	65	86	103	95	97	84	104	86	57	106	117	145	134	116	139	118	198	254	291	376	135	394	5.71449	4.48215	5.5599	5.55789	6.95501	7.91352	6.73561	7.47368	7.55646	6.96789	8.99187	6.07237	11.1784	11.1006	11.9455	11.8389	12.6384	14.4804	11.5775
ENSAMEG00000000356	GL192507.1	-	2244379	2251055	429	0	0	0	0	0	0	0	0	0	0	0	0	0	0	0	1	0	0	0	0	0	0	1	0	0	0	0	0	0	0	0	0	0	0	0	0	0	0	0	0	0.143749	0	0	0
ENSAMEG00000000357	GL194365.1	+	197566	199710	537	779	289	543	536	804	1398	1316	1259	1174	1853	549	518	652	601	862	895	589	1007	744	1159	1712	1614	1719	828	2281	85.0916	35.0771	61.3151	59.5721	84.5156	139.611	121.28	126.087	137.274	161.371	74.6114	71.7289	89.3724	74.1164	92.3049	102.78	83.4121	136.357	94.8825
ENSAMEG00000000358	GL192507.1	-	2275998	2284977	747	0	0	2	0	3	0	0	0	0	0	1	1	1	3	5	0	0	1	0	0	1	0	0	0	0	0	0	0.16235	0	0.226702	0	0	0	0	0	0.0976982	0.0995447	0.0985393	0.265959	0.384894	0	0	0.0973423	0
ENSAMEG00000000359	GL194285.1	-	97652	100523	1587	261	102	125	167	163	276	238	78	207	182	485	453	461	455	670	664	284	388	389	636	619	531	600	272	709	9.64689	4.18913	4.77612	6.28046	5.79783	9.32653	7.42179	2.64324	8.19007	5.36313	22.3034	21.2256	21.3823	18.9867	24.2767	25.8019	13.6091	17.7778	16.7865
ENSAMEG00000000360	GL193264.1	-	359372	754062	3159	115	141	121	198	140	160	215	20	199	159	315	277	306	403	438	347	343	438	388	460	198	136	287	289	232	3.62083	4.93295	3.93835	6.34314	4.24199	4.60569	5.71129	0.577345	6.7071	3.99124	12.3397	11.0562	12.0903	14.3254	13.5193	11.4862	14.0013	17.0956	14.2629
ENSAMEG00000000361	GL192667.1	+	162070	169432	702	0	1	0	0	1	5	39	19	36	5	2	0	1	1	9	3	87	17	29	15	30	45	75	2	23	0	0.092846	0	0	0.0804114	0.381963	2.74939	1.45558	3.22003	0.333086	0.207922	0	0.104856	0.0943359	0.73722	0.263539	9.42476	1.7609	2.8291
ENSAMEG00000000362	GL194285.1	-	106490	111614	699	345	166	303	217	259	461	246	63	212	376	587	498	606	404	604	504	370	550	407	411	538	631	563	506	497	28.9511	15.4786	26.285	18.5283	20.9159	35.3681	17.4167	4.8471	19.0438	25.1556	61.2869	52.9775	63.8154	38.2753	49.688	44.4646	40.2543	57.2147	39.8754
ENSAMEG00000000363	GL192667.1	+	185368	207236	1572	164	288	438	220	219	443	950	531	774	310	24	20	29	31	39	134	279	176	227	150	615	1051	1052	190	574	6.14686	11.9944	16.9708	8.38997	7.89923	15.1802	30.0412	18.2473	31.0542	9.26341	1.11919	0.950287	1.364	1.31178	1.43299	5.28021	13.5574	8.1775	9.93342
ENSAMEG00000000364	GL194467.1	+	129226	183712	519	328	239	316	350	345	157	167	416	117	314	401	229	411	364	728	494	485	967	378	734	532	545	758	331	899	20.89	16.9137	20.8051	22.6809	21.1453	9.14172	8.97358	24.2914	7.97665	15.9439	31.7755	18.4891	32.8483	26.1732	45.4531	33.0772	40.047	76.3465	28.1073
ENSAMEG00000000365	GL192389.1	+	2712649	2745578	1179	65	56	62	133	100	124	264	77	212	223	209	191	258	256	262	361	333	347	357	455	191	120	315	239	253	3.23387	3.09581	3.18875	6.73271	4.78786	5.64022	11.0815	3.51233	11.2906	8.84534	12.9372	12.0464	16.1078	14.3794	12.7785	18.8823	21.4792	21.4012	20.7368
ENSAMEG00000000366	GL194285.1	-	120005	130444	1557	125	36	28	71	49	495	843	34	503	256	715	1330	463	1320	662	2017	847	630	839	1343	692	872	383	1005	381	4.70918	1.507	1.09046	2.72158	1.77649	17.0492	26.7946	1.17438	20.2849	7.68909	33.5139	63.5188	21.8888	56.1435	24.449	79.8874	41.3698	29.4221	36.9029
ENSAMEG00000000367	GL194613.1	-	145132	148688	903	14	5	3	10	5	46	25	5	27	54	183	132	190	268	313	765	167	424	228	833	8	5	7	3	11	0.909419	0.360896	0.201454	0.660944	0.312563	2.73186	1.37013	0.297783	1.87746	2.7966	14.7901	10.8699	15.488	19.6545	19.9319	52.2438	14.0643	34.1429	17.2916
ENSAMEG00000000368	GL192936.1	-	241607	549313	1791	97	55	80	84	91	138	140	13	153	256	222	169	174	282	317	253	188	226	172	357	191	94	218	230	258	3.3568	2.11492	2.86195	2.95775	3.03059	4.36614	4.08759	0.41247	5.66782	7.06308	9.55851	7.41406	7.55631	11.0178	10.7543	9.20474	8.43483	9.69529	6.94938
ENSAMEG00000000369	GL192779.1	+	238962	441912	741	165	128	245	147	168	143	166	315	141	382	162	164	287	243	329	185	132	319	175	268	219	240	398	153	353	13.0614	11.2588	20.0489	11.84	12.7981	10.3492	11.0866	22.8618	11.948	24.1084	15.9553	16.4575	28.5098	21.7171	25.5311	15.3962	13.547	31.3036	16.1736
ENSAMEG00000000370	GL192909.1	-	52306	71311	930	258	184	351	194	241	354	327	349	271	458	411	273	404	371	633	414	460	424	519	508	472	493	771	415	614	16.2727	12.8954	22.8858	12.45	14.6281	20.4131	17.401	20.1818	18.297	23.0306	32.2527	21.8282	31.9763	26.4183	39.1392	27.4523	37.6152	33.1516	38.2183
ENSAMEG00000000371	GL194365.1	-	200655	204657	1578	7	0	2	4	4	19	2	6	6	7	211	102	169	62	125	50	13	32	16	35	17	12	15	1	4	0.260204	0	0.0768538	0.151288	0.14309	0.645705	0.0627237	0.204486	0.238747	0.207451	9.75849	4.80654	7.88334	2.60195	4.55507	1.954	0.626505	1.47457	0.694385
ENSAMEG00000000372	GL195000.1	+	12649	56127	1143	14	8	13	1	15	4	1	19	1	4	11	3	17	6	9	18	10	43	9	21	10	1	16	6	13	0.718465	0.456188	0.689667	0.0522163	0.740798	0.187673	0.0432975	0.893976	0.0549349	0.163658	0.70235	0.19517	1.0948	0.347632	0.452781	0.971152	0.665337	2.73555	0.539242
ENSAMEG00000000373	GL192779.1	+	491644	1380153	2333	166	315	129	419	70	362	1549	152	1373	237	440	2178	499	2989	506	958	2257	477	1608	595	526	788	618	674	446	4.17366	8.80027	3.35287	10.7189	1.69371	8.32112	32.8583	3.50386	36.953	4.7507	13.764	69.4196	15.744	84.8448	12.4718	25.3228	73.5707	14.8671	47.2018
ENSAMEG00000000374	GL193956.1	-	171	43110	1731	109	109	126	173	85	136	354	78	314	123	1488	1373	1546	1327	1665	686	1367	1147	1675	646	92	116	103	380	80	3.69363	4.10421	4.41383	5.96487	2.7719	4.21337	10.1208	2.42335	11.3901	3.32301	62.7354	58.981	65.742	50.7678	55.3107	24.4393	60.0564	48.1824	66.2682
ENSAMEG00000000375	GL192794.1	+	560705	562274	675	4530	2643	3286	2423	3642	2544	2901	3227	1829	2635	2192	1854	1879	1633	3254	2447	1233	1613	1434	1913	2946	4195	2377	3317	3208	393.657	255.208	295.193	214.241	304.573	202.116	212.693	257.107	170.139	182.558	236.998	204.242	204.905	160.213	277.208	223.558	138.914	173.761	145.49
ENSAMEG00000000376	GL192386.1	-	681123	689303	1101	244	149	258	483	264	264	284	191	272	257	469	2567	1902	2454	638	2486	2115	2336	2979	2514	1211	3522	1325	13749	845	12.9995	8.82062	14.2094	26.1825	13.5354	12.8589	12.7656	9.32963	15.5123	10.9161	31.088	173.371	127.161	147.605	33.3215	139.243	146.087	154.279	185.298
ENSAMEG00000000377	GL192630.1	+	747250	889998	1965	214	512	380	506	353	0	4	1	6	4	292	82	102	79	342	120	45	199	47	311	0	3	0	7	0	6.38815	16.9827	11.7264	15.3688	10.1407	0	0.100741	0.0273688	0.191727	0.0951965	10.8449	3.10306	3.82092	2.66243	10.0082	3.76599	1.74156	7.36398	1.63803
ENSAMEG00000000379	GL192519.1	-	1206	19539	2862	2126	1912	1739	1882	1395	1834	1881	543	1614	1240	4306	3818	3632	4180	4681	3828	3746	3621	4298	4042	2358	1836	3238	2174	2477	43.573	43.543	36.8445	39.2466	27.5144	34.3651	32.5258	10.2035	35.4102	20.2617	109.802	99.1985	93.4128	96.721	94.0504	82.4828	99.5374	91.9986	102.845
ENSAMEG00000000380	GL192549.1	-	1393961	1410985	597	50	174	42	322	50	20	206	7	125	26	374	580	406	872	554	842	1286	551	1498	620	51	175	66	431	48	4.91269	18.9966	4.26596	32.1909	4.72771	1.79657	17.0766	0.630583	13.1471	2.03668	45.7198	72.2425	50.059	96.7289	53.3614	86.9758	163.815	67.1119	171.84
ENSAMEG00000000381	GL194365.1	+	252756	255500	1080	404	248	131	197	153	268	231	4	127	107	1164	1575	457	582	540	1670	1159	943	955	974	465	208	311	706	149	21.9423	14.9668	7.35512	10.8867	7.99692	13.3076	10.5851	0.199184	7.38371	4.63323	78.6568	108.442	31.1475	35.6873	28.7516	95.3572	81.6108	63.4907	60.5574
ENSAMEG00000000382	GL192909.1	+	94481	100352	1827	26	26	41	23	36	34	9	59	12	71	41	20	23	23	64	68	34	48	30	99	29	21	58	12	59	0.834754	0.927545	1.36078	0.751348	1.11229	0.997995	0.243788	1.73673	0.412417	1.81737	1.63777	0.814011	0.926658	0.833688	2.01434	2.29526	1.41523	1.9104	1.12453
ENSAMEG00000000383	GL192523.1	-	1654441	1727339	1620	0	0	0	0	0	10	0	0	0	11	0	0	0	0	0	2	4	28	0	1	0	1	1	1	0	0	0	0	0	0	0.331034	0	0	0	0.317542	0	0	0	0	0	0.0761335	0.187773	1.2568	0
ENSAMEG00000000384	GL192909.1	+	138427	140349	1194	87	14	73	17	82	22	14	18	31	21	134	80	90	72	158	162	61	106	70	191	152	57	175	35	111	4.27404	0.76423	3.70733	0.849761	3.87672	0.988112	0.580273	0.810749	1.63024	0.822505	8.19045	4.98224	5.54841	3.9934	7.6093	8.36703	3.8852	6.45541	4.01496
ENSAMEG00000000385	GL193091.1	+	12845	34239	486	591	322	346	318	240	408	588	121	373	259	608	729	453	664	802	770	551	390	574	542	559	529	467	514	488	73.2909	44.3706	44.3565	40.1253	28.6421	46.258	61.5212	13.7576	49.5156	25.6072	93.8101	114.605	70.4965	92.9654	97.5001	100.39	88.5888	59.955	83.1071
ENSAMEG00000000386	GL192389.1	+	2751736	2754755	291	0	0	0	0	0	0	0	1	0	0	0	0	0	0	0	0	0	0	0	0	0	0	0	0	0	0	0	0	0	0	0	0	0.18481	0	0	0	0	0	0	0	0	0	0	0
ENSAMEG00000000387	GL192374.1	+	969047	1034083	1260	1	1	0	0	0	0	0	0	0	0	0	0	0	0	0	21	9	7	7	31	0	3	0	0	0	0.0563473	0.0626108	0	0	0	0	0	0	0	0	0	0	0	0	0	1.24403	0.657476	0.488956	0.460505
ENSAMEG00000000388	GL195000.1	-	55035	86043	1678	87	48	86	37	117	40	19	94	21	102	78	39	80	99	137	123	140	270	129	235	100	40	160	41	122	3.04124	1.86444	3.10777	1.31602	3.93594	1.27837	0.560364	3.01269	0.785818	2.84271	3.39242	1.72827	3.50936	3.90713	4.69483	4.52037	6.34489	11.7002	5.26484
ENSAMEG00000000389	GL192548.1	-	16216	81870	1683	306	124	242	288	270	417	449	143	331	963	1901	1169	1883	1734	3433	1274	714	1335	760	1688	322	248	674	400	556	10.665	4.80217	8.71914	10.2132	9.05596	13.2874	13.2029	4.56952	12.3492	26.7587	82.4337	51.6499	82.3562	68.2306	117.296	46.6816	32.2628	57.6792	30.9255
ENSAMEG00000000390	GL192909.1	-	156780	525633	2786	3	2	2	15	4	1	0	0	0	2	26	38	41	55	51	0	1	1	1	0	2	1	6	0	7	0.0733219	0.0543149	0.0505314	0.37302	0.0940814	0.0223448	0	0	0	0.0389711	0.790622	1.17737	1.25749	1.51763	1.22194	0	0.0316867	0.0302978	0.0285349
ENSAMEG00000000391	GL192523.1	+	1806493	1807192	672	0	0	0	0	0	0	0	0	0	0	0	0	0	0	0	0	0	0	0	0	0	0	0	0	0	0	0	0	0	0	0	0	0	0	0	0	0	0	0	0	0	0	0	0
ENSAMEG00000000392	GL193646.1	-	126892	137483	732	0	0	0	0	0	0	0	0	0	0	0	3	0	4	3	0	0	0	0	0	0	0	0	0	0	0	0	0	0	0	0	0	0	0	0	0	0.304754	0	0.361879	0.235669	0	0	0	0
ENSAMEG00000000393	GL192389.1	-	2762242	2914616	5571	102	133	91	185	85	208	280	68	253	167	242	122	187	253	304	867	688	782	741	1235	764	393	1177	305	1058	1.07397	1.55603	0.990491	1.98194	0.861273	2.00225	2.48733	0.656439	2.85155	1.40187	3.17022	1.62842	2.47081	3.00747	3.13785	9.59725	9.39168	10.2069	9.10904
ENSAMEG00000000394	GL192630.1	+	964327	1229676	100233	116368	130673	101432	109647	68210	32	4	11	32	22	239	104	66	118	203	631	253	367	210	1227	230	28	234	25	243	69.2523	86.4099	62.4014	66.3936	39.0643	0.0174107	0.00200838	0.00600189	0.0203855	0.0104382	0.176963	0.0784602	0.0492892	0.0792818	0.118431	0.394791	0.195203	0.270748	0.14591
ENSAMEG00000000395	GL192549.1	+	1680180	1695635	699	503	284	485	365	621	223	394	353	326	436	315	251	280	318	477	278	226	242	277	354	451	688	584	737	803	42.2099	26.4814	42.0733	31.165	50.1498	17.1086	27.8951	27.1591	29.2843	29.1698	32.8882	26.7015	29.4857	30.1276	39.2404	24.5261	24.5878	25.1745	27.1388
ENSAMEG00000000396	GL193646.1	-	164549	170093	894	0	0	0	1	1	2	1	3	0	1	892	216	1149	389	1722	14	16	95	20	27	0	1	1	2	0	0	0	0	0.0667597	0.0631419	0.119972	0.0553568	0.180469	0	0.0523102	72.8173	17.9662	94.6047	28.8155	110.761	0.96572	1.36104	7.72695	1.53207
ENSAMEG00000000397	GL192794.1	-	565411	577387	3111	1	2	0	1	0	1	0	0	0	0	2	0	1	3	3	3	4	2	1	4	20	17	24	9	14	0.0188609	0.041915	0	0.0191907	0	0.0172436	0	0	0	0	0.0469328	0	0.0236685	0.0638815	0.0554693	0.059487	0.097811	0.0467619	0.0220205
ENSAMEG00000000398	GL194509.1	+	15038	49504	834	0	0	0	0	0	715	287	2	160	1068	0	0	0	0	0	1	0	0	2	0	0	0	2	0	0	0	0	0	0	0	45.9756	17.0304	0.128968	12.0462	59.8865	0	0	0	0	0	0.0739426	0	0	0.16423
ENSAMEG00000000399	GL192374.1	+	1069808	1247887	1185	138	76	169	135	143	159	165	151	87	236	286	237	359	326	519	298	259	509	263	365	213	112	377	285	277	6.831	4.18018	8.6479	6.79935	6.81197	7.19559	6.89087	6.85294	4.60994	9.31359	17.6139	14.872	22.3001	18.2185	25.1849	15.5081	16.6215	31.2336	15.1993
ENSAMEG00000000400	GL193091.1	-	37933	64799	2067	40	21	36	48	22	30	33	2	53	17	129	139	128	133	140	119	121	103	155	95	59	28	70	70	64	1.13512	0.662184	1.0561	1.38597	0.60081	0.778339	0.7901	0.0520365	1.61001	0.38462	4.55466	5.0005	4.55827	4.26114	3.89475	3.55032	4.45177	3.62342	5.13545
ENSAMEG00000000401	GL192524.1	+	35647	215202	5118	20	21	34	23	31	22	13	1	11	29	178	123	177	127	241	393	365	670	447	447	1673	830	1647	143	1872	0.22922	0.267436	0.402829	0.268213	0.341914	0.230521	0.125705	0.010508	0.134954	0.264985	2.53821	1.78708	2.54568	1.6433	2.70775	4.73536	5.42351	9.51912	5.98129
ENSAMEG00000000402	GL193171.1	+	627339	645783	2430	1	2	0	5	1	2	1	1	1	5	47	16	92	28	65	17	16	35	12	72	3	2	10	3	2	0.0241389	0.0536443	0	0.122805	0.02323	0.0441379	0.0203658	0.0221316	0.0258397	0.0962249	1.41156	0.489613	2.78684	0.763073	1.53815	0.431423	0.500728	1.04733	0.338191
ENSAMEG00000000403	GL193956.1	-	123642	133491	1182	1	1	0	3	2	0	12	0	10	0	2	14	7	24	3	3	2	3	3	3	11	4	8	25	4	0.0496256	0.055142	0	0.15148	0.0955141	0	0.502426	0	0.531223	0	0.123487	0.880744	0.435924	1.34465	0.145947	0.156518	0.128677	0.184555	0.173817
ENSAMEG00000000405	GL193340.1	-	156031	723585	6854	0	0	3	3	0	0	0	0	1	1	0	0	2	0	1	0	0	0	0	1	226	15	107	7	354	0	0	0.0392731	0.0386549	0	0	0	0	0.0135558	0.0100961	0	0	0.0317828	0	0.0124143	0	0	0	0
ENSAMEG00000000406	GL194509.1	+	115301	138961	531	2	2	0	16	0	244	186	88	122	287	6	10	4	59	5	553	227	200	222	553	311	157	297	56	263	0.220932	0.245491	0	1.79836	0	24.6424	17.3351	8.91264	14.4265	25.2762	0.824639	1.40038	0.554493	7.3582	0.541461	64.2231	32.5102	27.3878	28.6316
ENSAMEG00000000407	GL193646.1	-	180417	199154	588	0	0	0	0	0	0	0	0	0	0	0	0	0	0	1	0	0	0	0	0	0	0	0	0	0	0	0	0	0	0	0	0	0	0	0	0	0	0	0	0.0977945	0	0	0	0
ENSAMEG00000000408	GL192438.1	-	1638252	1697724	2285	414	667	741	993	559	645	1511	499	1198	1887	1059	1158	1555	2314	2137	1123	2142	2447	2204	1645	572	624	1148	1253	1022	10.6277	19.0257	19.6641	25.9367	13.8096	15.1378	32.7255	11.7445	32.9204	38.6197	33.8234	37.6844	50.0927	67.0643	53.7787	30.3078	71.2888	77.8699	66.0561
ENSAMEG00000000409	GL193956.1	-	162158	227513	2274	115	47	104	57	114	95	49	312	46	178	75	76	119	112	169	113	90	141	114	159	124	132	365	119	202	2.96641	1.34712	2.77322	1.49602	2.82989	2.24038	1.06639	7.37874	1.27017	3.66061	2.40701	2.4852	3.852	3.26168	4.27354	3.06442	3.00982	4.50869	3.43322
ENSAMEG00000000410	GL194285.1	+	135355	190572	1379	119	80	87	76	81	264	346	16	270	153	477	415	200	290	381	372	471	270	318	309	183	87	198	125	118	5.06182	3.78117	3.82558	3.28928	3.3157	10.2666	12.4171	0.623985	12.294	5.18861	25.2442	22.3781	10.6757	13.9267	15.8874	16.6356	25.9744	14.2371	15.7925
ENSAMEG00000000411	GL192374.1	+	1280970	1309598	2631	526	610	573	697	469	945	1290	330	1293	1575	1068	824	948	1346	1447	889	1100	1337	1164	1266	710	695	1619	617	1009	11.727	15.1116	13.2061	15.8112	10.0625	19.2619	24.2648	6.74546	30.8583	27.9952	29.6249	23.2887	26.5227	33.8796	31.6256	20.8373	31.7951	36.9516	30.2984
ENSAMEG00000000412	GL192519.1	-	87929	97402	2457	5210	2420	2526	2100	2472	1990	1998	633	1315	734	2710	2865	1753	2185	2381	4731	1949	1882	2646	2922	1136	1279	840	1155	716	124.382	64.1964	62.3405	51.0113	56.7935	43.4346	40.2438	13.8553	33.6059	13.9706	80.4954	86.7078	52.5179	58.8926	55.7245	118.743	60.3246	55.6976	73.7517
ENSAMEG00000000413	GL193646.1	-	209914	230901	2559	0	0	2	0	2	2	0	2	0	3	0	0	1	0	0	0	0	2	0	1	1	0	9	0	0	0	0	0.0473917	0	0.0441179	0.0419129	0	0.0420318	0	0.0548245	0	0	0.0287647	0	0	0	0	0.0568305	0
ENSAMEG00000000414	GL192936.1	+	621836	625194	966	468	697	817	901	358	843	787	737	631	633	1617	2817	1842	3001	1668	2020	3612	1454	2884	1588	1195	2052	1404	1458	1089	28.4179	47.0279	51.2846	55.6673	20.92	46.7992	40.3187	41.0307	41.0154	30.6443	122.163	216.845	140.36	205.733	99.2912	128.954	284.354	109.448	204.459
ENSAMEG00000000415	GL192549.1	+	1745025	1833540	1827	283	318	363	399	239	122	245	94	282	146	1188	942	1162	1375	1248	792	1269	992	1463	1097	454	330	580	581	614	9.25827	11.5597	12.2763	13.2814	7.52441	3.64895	6.7623	2.81946	9.87559	3.80799	48.3552	39.067	47.7041	50.7851	40.0245	27.2399	53.8232	40.2303	55.8794
ENSAMEG00000000416	GL193097.1	-	330809	344388	552	671	661	433	662	413	676	1251	471	846	559	806	844	933	1117	1034	871	754	718	844	732	577	534	812	1598	543	71.3029	78.0481	47.5654	71.5766	42.2344	65.6743	112.157	45.8881	96.2334	47.3583	106.562	113.695	124.415	134.007	107.714	97.3061	103.877	94.5818	104.711
ENSAMEG00000000417	GL193091.1	+	72515	85535	801	164	39	101	95	106	398	251	336	127	260	785	501	818	464	1071	819	280	393	312	693	532	434	565	175	485	12.0098	3.17345	7.64594	7.07853	7.47013	26.6464	15.5078	22.5593	9.95556	15.1797	71.5227	46.5098	75.1711	38.3619	76.8862	63.0539	26.5836	35.6765	26.6753
ENSAMEG00000000418	GL192936.1	-	639844	655140	903	20	19	15	18	10	70	57	43	44	102	24	24	14	37	30	48	64	27	53	52	31	46	68	55	49	1.29917	1.37141	1.00727	1.1897	0.625125	4.15717	3.12389	2.56094	3.05956	5.28246	1.93968	1.97634	1.14122	2.71349	1.9104	3.27804	5.3899	2.17419	4.01953
ENSAMEG00000000419	GL193097.1	-	418429	476908	1248	5	6	0	5	9	1	0	3	0	0	6	0	15	5	15	3	0	4	0	5	0	0	0	0	0	0.235006	0.313355	0	0.239115	0.407083	0.0429708	0	0.129278	0	0	0.350868	0	0.884722	0.26532	0.691144	0.148241	0	0.23306	0
ENSAMEG00000000421	GL192667.1	+	231682	238079	1692	36	24	56	18	55	51	40	19	31	51	44	28	27	34	48	107	54	73	83	153	66	73	78	57	63	1.24803	0.924509	2.00692	0.634928	1.83492	1.61643	1.16995	0.603909	1.15042	1.40959	1.89784	1.23054	1.17461	1.33074	1.6313	3.89982	2.42707	3.13722	3.35943
ENSAMEG00000000422	GL192936.1	+	680511	692412	1239	179	346	104	302	138	480	502	113	379	440	152	174	47	144	122	167	379	92	236	146	3811	4612	1733	958	4186	8.47433	18.2014	5.08984	14.5475	6.28728	20.7758	20.0512	4.90485	19.2071	16.6075	8.95322	10.4428	2.79227	7.69672	5.66213	8.31201	23.2625	5.39931	13.0445
ENSAMEG00000000423	GL193646.1	-	236051	243783	567	12	0	4	0	12	4	7	6	3	14	1	0	1	1	1	16	0	13	1	26	6	0	48	0	14	1.24143	0	0.427779	0	1.19468	0.378325	0.610975	0.569097	0.332225	1.1547	0.128713	0	0.129822	0.116797	0.101416	1.74019	0	1.66718	0.120783
ENSAMEG00000000424	GL194285.1	-	200797	201254	252	0	0	0	0	0	0	0	0	0	0	0	0	0	0	0	0	0	0	0	0	0	0	0	0	0	0	0	0	0	0	0	0	0	0	0	0	0	0	0	0	0	0	0	0
ENSAMEG00000000425	GL192386.1	-	709220	776623	1083	258	158	255	312	257	404	563	131	555	467	807	1167	962	1919	1173	1156	1315	1786	1706	1679	400	395	710	1343	549	13.9738	9.50887	14.2776	17.1941	13.3955	20.0051	25.727	6.50521	32.178	20.1656	54.3816	80.1275	65.3848	117.344	62.2818	65.8249	92.3391	119.915	107.879
ENSAMEG00000000426	GL194285.1	-	273385	273882	465	0	0	0	0	0	0	0	0	0	0	1	0	0	0	0	0	0	0	0	5	0	0	0	0	0	0	0	0	0	0	0	0	0	0	0	0.156947	0	0	0	0	0	0	0	0
ENSAMEG00000000428	GL192936.1	-	706587	727890	1326	1	1	10	3	0	6	1	0	3	1	0	2	2	1	0	2	2	4	11	1	41	6	22	7	43	0.0442364	0.0491538	0.457297	0.13503	0	0.242659	0.037322	0	0.14206	0.0352679	0	0.112157	0.111024	0.0499426	0	0.0930138	0.114703	0.21935	0.568116
ENSAMEG00000000429	GL192374.1	-	1332583	1390915	2724	10	37	21	20	22	62	87	23	94	96	68	71	85	65	66	70	132	242	95	95	484	530	740	152	739	0.215336	0.885309	0.467471	0.438203	0.455901	1.2206	1.5806	0.454087	2.16678	1.64812	1.82183	1.93816	2.2969	1.58023	1.39325	1.58472	3.68515	6.45997	2.38838
ENSAMEG00000000430	GL194285.1	-	284747	285163	228	1	1	5	0	5	0	1	0	0	0	12	3	9	2	10	23	8	6	11	17	2	2	6	1	0	0.25727	0.285868	1.32977	0	1.23791	0	0.217057	0	0	0	3.84108	0.97842	2.90561	0.580911	2.52207	6.22091	2.66835	1.91354	3.30404
ENSAMEG00000000432	GL193394.1	-	3217	101392	4320	94	36	57	33	66	33	4	1	10	43	1352	726	707	873	1618	124	34	141	61	163	98	17	158	24	103	1.27634	0.543149	0.80008	0.455913	0.862413	0.409655	0.0458231	0.012449	0.145349	0.465488	22.8402	12.4966	12.0466	13.3827	21.5371	1.7701	0.598526	2.37333	0.967016
ENSAMEG00000000433	GL192548.1	+	200530	216597	576	253	63	131	87	199	294	258	403	167	366	362	200	480	258	618	355	78	364	92	429	227	152	290	75	366	25.7645	7.12883	13.7908	9.01465	19.5023	27.3724	22.1669	37.6271	18.2049	29.7154	45.8662	25.8194	61.3407	29.6628	61.6961	38.0073	10.2982	45.9516	10.9384
ENSAMEG00000000434	GL192920.1	-	62304	73786	1881	43	2	10	41	65	57	37	9	22	94	1441	204	397	248	1438	638	94	334	128	810	99	30	51	37	120	1.34092	0.0693013	0.322369	1.30091	1.95065	1.62508	0.973468	0.257319	0.734393	2.33702	55.9091	8.06455	15.5357	8.73127	43.9604	20.9167	3.80038	12.9116	4.66024
ENSAMEG00000000435	GL194527.1	+	26099	34228	252	0	0	0	0	0	0	0	0	0	0	0	0	0	0	0	0	0	0	0	0	0	0	0	0	0	0	0	0	0	0	0	0	0	0	0	0	0	0	0	0	0	0	0	0
ENSAMEG00000000436	GL192548.1	+	292900	297773	720	0	0	0	0	0	0	0	0	0	3	1	1	1	0	4	2	0	4	0	3	2	0	9	0	3	0	0	0	0	0	0	0	0	0	0.194855	0.101362	0.103278	0.102235	0	0.319462	0.1713	0	0.40397	0
ENSAMEG00000000437	GL194527.1	-	47258	50363	279	0	0	0	0	0	0	0	1	1	0	0	0	0	0	0	1	0	0	0	0	6	2	1	0	1	0	0	0	0	0	0	0	0.192759	0.225056	0	0	0	0	0	0	0.221033	0	0	0
ENSAMEG00000000438	GL193646.1	+	288996	301254	702	0	0	1	0	0	372	117	92	100	864	19	12	36	20	16	0	0	7	0	0	0	1	2	1	1	0	0	0.0863784	0	0	28.418	8.24817	7.04805	8.94452	57.5573	1.97526	1.27111	3.77482	1.88672	1.31061	0	0	0.725075	0
ENSAMEG00000000439	GL194527.1	+	79849	80871	900	0	0	0	0	0	0	0	0	0	0	0	0	0	0	0	0	0	0	0	0	0	0	0	0	1	0	0	0	0	0	0	0	0	0	0	0	0	0	0	0	0	0	0	0
ENSAMEG00000000440	GL192548.1	+	318556	322227	1107	187	114	294	151	211	248	233	126	187	414	450	305	361	464	651	523	400	597	450	734	333	133	488	214	491	9.90872	6.71208	16.1043	8.14107	10.7594	12.0141	10.4164	6.12127	10.6069	17.4895	29.6669	20.4876	24.0043	27.7578	33.8162	29.135	27.479	39.2147	27.8389
ENSAMEG00000000441	GL192548.1	-	332608	333231	609	1	0	2	1	0	0	0	0	0	0	1	0	1	1	0	0	2	0	2	0	0	0	3	0	0	0.0963178	0	0.199138	0.098002	0	0	0	0	0	0	0.119837	0	0.120868	0.108742	0	0	0.249747	0	0.224906
ENSAMEG00000000442	GL193171.1	+	681527	700733	1602	0	0	0	0	0	0	0	0	0	0	1	0	0	0	0	0	0	2	1	0	0	0	0	0	0	0	0	0	0	0	0	0	0	0	0	0.0455559	0	0	0	0	0	0	0.0907799	0.0427489
ENSAMEG00000000443	GL193097.1	-	480973	688380	1847	9	7	4	6	7	44	22	13	25	26	15	16	16	17	23	14	10	15	17	9	20	31	23	5	11	0.285824	0.24702	0.131321	0.193882	0.213937	1.27754	0.589474	0.378525	0.849899	0.658309	0.592695	0.644157	0.637651	0.609532	0.716065	0.467436	0.411738	0.590536	0.630332
ENSAMEG00000000444	GL192548.1	+	366728	371188	1476	15	2	13	2	14	20	14	2	7	14	46	11	37	35	82	40	14	33	10	51	33	6	56	7	40	0.596113	0.0883169	0.534071	0.0808715	0.535423	0.72666	0.469408	0.0728722	0.297787	0.443573	2.27446	0.554173	1.84521	1.57035	3.19462	1.67122	0.721323	1.62573	0.463982
ENSAMEG00000000445	GL195656.1	-	22572	26461	336	0	9	3	3	0	0	1	0	1	0	3	4	2	3	9	7	7	3	5	14	4	7	4	2	4	0	1.74584	0.541407	0.532886	0	0	0.147289	0	0.186877	0	0.651612	0.885237	0.438148	0.591284	1.54026	1.28475	1.58433	0.649238	1.0191
ENSAMEG00000000446	GL195145.1	-	22259	23577	951	0	0	0	0	0	0	0	0	0	0	0	0	0	0	0	0	0	0	0	0	0	1	0	0	0	0	0	0	0	0	0	0	0	0	0	0	0	0	0	0	0	0	0	0
ENSAMEG00000000447	GL192548.1	-	377133	381930	1602	196	109	320	126	204	205	262	221	279	250	211	164	202	234	267	297	183	252	198	503	315	165	468	216	403	7.17657	4.4347	12.1124	4.69418	7.18824	6.86245	8.09371	7.41905	10.9354	7.29795	9.61229	7.61238	9.28152	9.67314	9.58386	11.4329	8.68714	11.4383	8.46428
ENSAMEG00000000448	GL193091.1	+	98032	138804	6003	221	99	77	77	112	195	66	7	49	51	607	774	403	382	321	649	585	471	443	418	400	265	245	119	249	2.15947	1.0749	0.777794	0.765552	1.05318	1.74202	0.544107	0.0627116	0.512533	0.397306	7.37951	9.58764	4.94159	4.21414	3.07488	6.6671	7.41098	5.70525	5.05386
ENSAMEG00000000449	GL195392.1	-	31254	32513	963	0	0	0	0	0	0	0	0	0	0	0	0	0	0	0	0	0	0	0	0	0	0	0	0	0	0	0	0	0	0	0	0	0	0	0	0	0	0	0	0	0	0	0	0
ENSAMEG00000000450	GL192548.1	-	474667	566719	981	937	517	479	521	552	375	374	153	242	220	1143	1362	680	1287	1195	1129	637	646	649	876	513	335	393	503	424	56.0266	34.3496	29.608	31.6972	31.7633	20.4998	18.8674	8.38766	15.4896	10.4876	85.0324	103.24	51.0235	86.8808	70.0472	70.9718	49.3808	47.8835	45.3068
ENSAMEG00000000451	GL193646.1	+	323578	331448	717	0	0	0	0	0	840	304	210	291	1894	10	14	13	13	4	1	0	30	1	1	1	0	2	0	1	0	0	0	0	0	62.8272	20.9828	15.7514	25.484	123.533	1.01786	1.45194	1.33461	1.20071	0.320799	0.0860086	0	3.04246	0.0955143
ENSAMEG00000000452	GL192374.1	-	1399696	1401530	174	201	155	290	190	293	103	237	340	145	310	141	130	223	219	348	148	146	302	171	199	184	207	247	170	346	67.7595	58.0607	101.063	65.1713	95.0546	31.745	67.4074	105.087	52.3255	83.3175	59.1394	55.5563	94.3378	83.3507	115.006	52.4534	63.8104	126.206	67.303
ENSAMEG00000000453	GL194459.1	+	74594	79810	807	0	0	0	0	0	0	0	0	0	0	0	0	0	0	0	0	0	0	0	0	0	1	0	0	0	0	0	0	0	0	0	0	0	0	0	0	0	0	0	0	0	0	0	0
ENSAMEG00000000454	GL192374.1	+	1410467	1419310	1962	0	1	1	2	3	1	0	0	0	1	13	2	12	8	16	6	6	3	3	14	12	2	11	1	9	0	0.0362704	0.0337438	0.0664254	0.0942384	0.0298428	0	0	0	0.0260241	0.527962	0.0827601	0.491545	0.29482	0.511992	0.205904	0.253917	0.121393	0.11433
ENSAMEG00000000455	GL194235.1	-	153425	228667	4344	17	27	16	85	20	15	14	0	7	6	324	744	311	454	219	369	476	343	402	237	377	270	171	186	206	0.229553	0.405111	0.223343	1.16783	0.259893	0.185178	0.159495	0	0.101182	0.0645929	5.4433	12.7357	5.26988	6.92118	2.89899	5.23838	8.33307	5.74151	6.33758
ENSAMEG00000000456	GL194527.1	+	87816	95243	234	0	0	0	0	3	174	154	158	80	638	0	0	1	1	0	0	7	53	0	34	1267	1554	1588	251	3465	0	0	0	0	0.723703	39.8769	32.5697	36.3128	21.4669	127.505	0	0	0.314568	0.283008	0	0	2.27494	16.4696	0
ENSAMEG00000000457	GL192519.1	+	113826	122817	540	560	229	407	252	461	338	370	341	259	397	633	514	716	617	905	877	517	761	528	874	692	628	620	360	764	60.83	27.6402	45.7028	27.8522	48.1906	33.5669	33.9091	33.9609	30.1162	34.3811	85.5494	70.7796	97.5999	75.6669	96.371	100.154	72.809	102.474	66.9619
ENSAMEG00000000458	GL194314.1	+	4873	246312	816	8	1	2	6	1	1	0	1	0	1	23	9	18	16	20	19	4	2	0	11	9	5	11	8	3	0.377826	0.0524782	0.0976451	0.288325	0.0454499	0.0431784	0	0.0433009	0	0.0376532	1.35149	0.53884	1.0668	0.853125	0.925977	0.943393	0.244921	0.117093	0
ENSAMEG00000000459	GL194459.1	-	140805	165471	1167	64	21	33	38	39	139	75	25	44	134	198	132	102	139	240	195	161	139	178	202	153	44	167	93	172	3.21686	1.17287	1.71469	1.94341	1.88646	6.38751	3.18053	1.15209	2.36742	5.36979	12.3823	8.41089	6.43368	7.88784	11.8258	10.3044	10.4916	8.66096	10.4457
ENSAMEG00000000460	GL194682.1	+	36278	36752	387	0	0	3	0	0	0	0	3	1	0	381	116	169	379	717	3	9	47	14	9	0	0	0	2	0	0	0	0.470059	0	0	0	0	0.416897	0.16225	0	71.8491	22.2888	32.1445	64.8549	106.537	0.478048	1.76856	8.83098	2.47745
ENSAMEG00000000461	GL192519.1	+	151297	153892	2115	0	2	1	0	0	0	0	0	1	1	39	23	12	9	34	68	24	15	13	39	93	13	32	6	75	0	0.0616339	0.0286703	0	0	0	0	0	0.0296882	0.0221112	1.34574	0.808642	0.417639	0.281804	0.924401	1.98271	0.862957	0.515707	0.42094
ENSAMEG00000000462	GL194682.1	-	57332	59013	1422	39	33	59	40	58	1	2	0	3	2	10	6	8	11	10	24	17	15	12	24	7	5	14	12	5	1.60875	1.51257	2.51591	1.67885	2.30241	0.0377128	0.0696048	0	0.13247	0.065774	0.513225	0.313755	0.414115	0.51228	0.404382	1.04081	0.909154	0.767033	0.577922
ENSAMEG00000000463	GL193646.1	-	358739	404967	644	1	0	3	1	5	2	5	7	4	6	5	3	9	2	0	5	1	15	2	9	1	0	0	0	0	0.0910831	0	0.282473	0.0926758	0.438267	0.166545	0.384231	0.584562	0.390003	0.435701	0.566619	0.346397	1.0287	0.205664	0	0.47879	0.118087	1.69366	0.212682
ENSAMEG00000000464	GL192519.1	-	157951	162797	1113	477	257	353	313	372	574	276	169	240	473	598	425	680	450	784	465	290	475	301	452	1020	1354	1056	664	1260	25.1389	15.0501	19.2319	16.7842	18.867	27.657	12.2722	8.16601	13.5397	19.8742	39.2115	28.3944	44.9722	26.7751	40.5054	25.7643	19.8149	31.0328	18.5208
ENSAMEG00000000465	GL194682.1	-	105278	108244	1485	0	0	0	0	0	0	0	0	0	0	0	0	3	0	0	0	0	0	0	0	3	2	10	0	5	0	0	0	0	0	0	0	0	0	0	0	0	0.148705	0	0	0	0	0	0
ENSAMEG00000000466	GL192936.1	-	770039	815666	1473	3	3	5	4	0	2	0	6	0	7	13	6	30	8	14	12	2	6	4	12	6	3	1	8	2	0.119465	0.132745	0.20583	0.162073	0	0.072814	0	0.219062	0	0.222238	0.644092	0.302892	1.49916	0.359668	0.546534	0.502388	0.103256	0.29619	0.185971
ENSAMEG00000000467	GL192909.1	+	990538	1004935	1461	434	430	213	685	335	254	507	89	377	401	2953	4564	3964	4756	3742	1521	1416	1575	1607	1563	238	268	334	495	324	17.4246	19.1831	8.84039	27.9829	12.9434	9.32334	17.1738	3.27611	16.2026	12.8356	147.51	232.292	199.716	215.579	147.28	64.2007	73.7057	78.3885	75.3274
ENSAMEG00000000468	GL192374.1	+	1446825	1541107	2928	0	0	0	0	0	1	0	1	1	9	333	6	6	18	484	6	12	31	0	33	1	0	16	0	1	0	0	0	0	0	0.0183154	0	0.0183674	0.0214449	0.143746	8.30004	0.152377	0.150838	0.407114	9.5053	0.126369	0.311672	0.769862	0
ENSAMEG00000000469	GL193373.1	+	9231	35838	906	369	132	68	134	416	736	246	157	164	811	365	243	360	246	481	218	68	153	96	248	677	503	284	1355	771	23.8903	9.49611	4.55117	8.82732	25.9191	43.565	13.4374	9.31944	11.3661	41.8616	29.4016	19.9442	29.2486	17.9813	30.5287	14.8385	5.7078	12.2796	7.25656
ENSAMEG00000000470	GL192548.1	-	695012	1052581	2578	1154	943	987	1138	1167	2	1	2	1	3	155	89	60	96	162	53	45	61	16	14	106	96	111	43	93	26.2571	23.8412	23.2154	26.3458	25.5531	0.041604	0.0191967	0.041722	0.0243563	0.0544204	4.38789	2.56712	1.71316	2.46605	3.61346	1.26781	1.32745	1.72056	0.425035
ENSAMEG00000000471	GL195177.1	-	38807	39949	822	62	52	47	59	40	37	97	6	55	17	113	190	95	210	144	117	198	100	133	84	86	35	98	94	66	4.42429	4.12317	3.46711	4.28383	2.7469	2.41389	5.83994	0.392553	4.20132	0.967165	10.0326	17.1878	8.50711	16.9185	10.0735	8.77758	18.3181	8.84607	11.0807
ENSAMEG00000000472	GL193646.1	+	418452	427249	576	2	0	0	1	0	2	1	0	0	5	8	0	3	1	3	5	0	7	1	10	0	0	0	0	2	0.203672	0	0	0.103617	0	0.186207	0.0859184	0	0	0.405949	1.01362	0	0.38338	0.114972	0.299496	0.535314	0	0.883685	0.118895
ENSAMEG00000000473	GL192519.1	-	163463	166235	1293	5	1	1	3	2	4	2	3	0	3	19	5	5	5	13	146	138	270	4	121	26	18	58	0	22	0.226827	0.0504083	0.0468968	0.138476	0.0873145	0.165901	0.0765491	0.124779	0	0.108504	1.07241	0.287548	0.284644	0.256086	0.578145	6.9633	8.1165	15.184	0.21186
ENSAMEG00000000474	GL192374.1	+	1543893	1558251	801	0	0	0	0	0	0	0	0	0	3	117	2	1	5	179	0	5	10	5	0	0	0	7	0	3	0	0	0	0	0	0	0	0	0	0.175151	10.6601	0.185668	0.0918962	0.413382	12.8503	0	0.474707	0.907799	0.427489
ENSAMEG00000000475	GL194607.1	+	7499	88800	3657	33	31	67	55	52	66	57	14	44	116	162	81	146	130	206	92	68	184	78	208	73	49	192	41	139	0.529313	0.552506	1.11094	0.897614	0.802663	0.967847	0.771363	0.205883	0.755478	1.48339	3.23294	1.64702	2.93872	2.35414	3.23917	1.5514	1.41407	3.6586	1.46069
ENSAMEG00000000476	GL192438.1	-	1755104	1786421	678	221	244	246	367	232	296	317	237	264	431	509	586	508	976	805	500	736	586	742	595	385	355	431	489	513	19.1199	23.4563	22.0013	32.3064	19.3158	23.4126	23.1387	18.7991	24.4494	29.7284	54.7892	64.2698	55.1524	95.3311	68.2744	45.478	82.5536	62.8478	74.9483
ENSAMEG00000000477	GL192374.1	+	1609265	1616946	216	8349	7989	15246	8687	16515	1533	2946	7163	1898	6125	1318	724	2435	1555	4652	1391	920	2932	1282	2500	2863	4531	4746	4954	7443	2267.28	2410.68	4280.01	2400.31	4315.98	380.607	674.975	1783.44	551.743	1326.1	445.316	249.243	829.804	476.75	1238.45	397.131	323.908	987.034	406.464
ENSAMEG00000000478	GL192374.1	-	1624823	2389644	12054	373	496	301	646	403	406	786	24	699	340	1528	1048	905	1408	1897	962	1265	1032	1362	1267	647	460	979	1082	672	3.00333	4.43764	2.50541	5.29243	3.1227	2.98871	5.33951	0.177174	6.02479	2.18259	15.3074	10.6972	9.14428	12.7993	14.9737	8.14341	13.2053	10.3008	12.8037
ENSAMEG00000000479	GL193646.1	-	431472	453545	655	1	0	0	3	1	1	0	1	0	3	5	0	6	0	3	19	5	43	3	16	0	0	1	0	2	0.0895535	0	0	0.273358	0.0861814	0.0818741	0	0.0821064	0	0.214192	0.557103	0	0.67428	0	0.263373	1.78885	0.58052	4.77364	0.313666
ENSAMEG00000000480	GL193091.1	-	140836	143922	567	203	10	18	21	118	7	7	0	4	17	111	64	56	40	82	199	46	75	40	119	225	102	139	30	160	21.0008	1.14952	1.925	2.21049	11.7477	0.662068	0.610975	0	0.442967	1.40213	14.2872	8.39336	7.27001	4.67188	8.31615	21.6437	6.16968	9.61834	4.8313
ENSAMEG00000000481	GL192549.1	-	1842517	1868317	933	836	741	754	695	685	850	552	1041	427	646	359	269	556	251	447	344	139	398	195	421	884	1197	1117	995	848	52.5591	51.7651	49.004	44.4585	41.4442	48.8568	29.2797	60.005	28.7369	32.3798	28.0815	21.4392	43.8655	17.8158	27.5497	22.7372	11.3298	31.0187	14.3133
ENSAMEG00000000482	GL193646.1	-	458220	464378	729	2	0	0	1	6	4	1	0	2	9	3	1	7	1	11	53	16	58	12	71	1	4	1	5	5	0.160926	0	0	0.08187	0.464599	0.294253	0.0678861	0	0.172265	0.577349	0.300331	0.102003	0.706807	0.090842	0.867674	4.48342	1.66909	5.78526	1.1273
ENSAMEG00000000483	GL192386.1	+	787482	864129	2892	0	0	0	0	0	6	2	25	4	13	1	1	0	0	0	1	0	2	0	0	3	1	0	0	0	0	0	0	0	0	0.11126	0.0342248	0.464901	0.0868473	0.210217	0.0252353	0.0257123	0	0	0	0.0213237	0	0.0502868	0
ENSAMEG00000000484	GL192667.1	-	240800	243789	699	1	0	2	1	0	3	3	0	0	1	0	2	0	2	3	3	6	0	2	5	2	5	7	0	10	0.0839163	0	0.173498	0.0853837	0	0.230161	0.212399	0	0	0.0669031	0	0.212761	0	0.189482	0.246795	0.26467	0.652773	0	0.195948
ENSAMEG00000000485	GL192920.1	+	241276	251741	2412	10	4	2	5	7	64	143	8	108	65	229	173	254	288	390	65	51	24	55	109	81	53	113	110	91	0.24319	0.108089	0.05028	0.123721	0.163823	1.42295	2.93405	0.178374	2.81152	1.26026	6.92891	5.33344	7.75152	7.90732	9.29777	1.66187	1.60798	0.723529	1.56161
ENSAMEG00000000486	GL192438.1	-	1824556	1842658	1050	154	80	106	170	137	1033	1418	684	833	1356	342	234	423	349	602	789	434	767	434	878	340	280	509	713	481	8.6031	4.96593	6.12151	9.66299	7.36523	52.7593	66.8337	35.0336	49.8138	60.394	23.7708	16.5716	29.6539	22.0115	32.9685	46.3392	31.4332	53.1163	28.3066
ENSAMEG00000000487	GL192524.1	+	850495	879678	1449	575	304	700	477	738	1994	1589	559	1401	4047	2065	1296	3052	2265	3557	2501	1164	2934	1636	3912	2169	1900	4940	1033	4006	23.2768	13.6743	29.2935	19.6473	28.7503	73.798	54.2705	20.7473	60.7105	130.614	104.006	66.5083	155.041	103.518	141.159	106.44	61.0904	147.236	77.3219
ENSAMEG00000000488	GL193091.1	-	149194	160563	3431	613	228	169	163	215	917	1399	26	561	235	4463	5377	1714	1933	2062	3301	2074	1276	1895	1451	2335	2210	948	400	1405	10.4801	4.33126	2.98681	2.83543	3.53731	14.333	20.1793	0.407541	10.2668	3.2031	94.9321	116.536	36.7723	37.31	34.5589	59.3315	45.9702	27.0428	37.8247
ENSAMEG00000000489	GL192920.1	+	341891	373428	2412	118	150	91	340	111	82	119	10	109	69	1011	433	456	555	1186	243	291	216	354	271	55	80	120	736	59	2.86965	4.05335	2.28774	8.41306	2.59777	1.82316	2.44162	0.222967	2.83755	1.33781	30.5901	13.349	13.9161	15.2381	28.2748	6.21283	9.17495	6.51176	10.0511
ENSAMEG00000000490	GL193373.1	+	42334	133740	1194	768	1372	924	1951	1000	428	808	146	600	518	1004	1040	768	1452	1686	787	1034	731	1035	1012	560	472	727	2900	730	37.7295	74.8945	46.9256	97.5226	47.2771	19.2233	33.49	6.57608	31.553	20.2885	61.3672	64.7691	47.3464	80.5335	81.1979	40.6473	65.8574	44.5179	59.364
ENSAMEG00000000491	GL192667.1	+	246304	250721	804	1560	1061	1299	903	1021	1338	1314	1245	857	1244	923	811	806	690	1044	815	857	917	885	858	1036	1450	1039	911	1043	113.813	86.0121	97.9705	67.0323	71.6844	89.2458	80.8813	83.2783	66.9297	72.3582	83.7824	75.0073	73.792	56.8339	74.6683	62.5119	81.0612	82.9345	75.3832
ENSAMEG00000000492	GL193394.1	+	200390	224862	1737	93	66	97	157	135	114	52	7	47	184	1231	1577	897	1644	1505	315	336	457	386	347	186	87	208	141	186	3.14056	2.47653	3.38621	5.39451	4.38721	3.5196	1.48154	0.216729	1.699	4.95384	51.7208	67.5104	38.0122	62.6782	49.8228	11.1833	14.7105	19.131	15.2186
ENSAMEG00000000493	GL193646.1	-	494761	498617	459	0	0	0	0	0	0	0	0	0	0	0	0	0	0	0	0	0	0	0	0	1	0	2	0	1	0	0	0	0	0	0	0	0	0	0	0	0	0	0	0	0	0	0	0
ENSAMEG00000000494	GL193595.1	-	3820	23678	930	22002	19147	27059	23078	20969	13540	12847	51221	10468	15192	7175	8234	9586	10738	12175	9020	6612	7106	9674	9486	8018	10827	9450	11172	10181	1387.72	1341.89	1764.29	1481.04	1272.77	780.771	683.64	2961.99	706.765	763.934	563.049	658.365	758.726	764.636	752.797	598.115	540.677	555.603	712.378
ENSAMEG00000000495	GL192920.1	+	628943	662254	1722	268	222	253	352	254	284	476	543	510	309	632	559	928	769	808	528	698	648	720	694	536	418	811	560	743	9.12904	8.40272	8.90901	12.2001	8.32637	8.8445	13.6799	16.9584	18.5965	8.39168	26.785	24.1389	39.6684	29.5738	26.9817	18.9087	30.8255	27.363	28.6343
ENSAMEG00000000496	GL192438.1	-	1848908	1857660	645	47	25	48	56	64	56	39	86	25	103	163	101	156	141	261	102	114	198	184	205	85	29	151	140	95	4.27427	2.52627	4.51257	5.1818	5.60112	4.65603	2.99236	7.17063	2.43374	7.46795	18.4431	11.644	17.8031	14.4768	23.2687	9.75217	13.4411	22.3217	19.5364
ENSAMEG00000000497	GL192519.1	-	188101	302646	2580	46	45	78	52	80	54	37	18	32	48	144	120	40	153	162	87	127	112	111	150	72	43	124	91	82	1.04583	1.13682	1.83323	1.20292	1.75035	1.12244	0.709726	0.375207	0.778798	0.870052	4.07333	3.4586	1.14122	3.92723	3.61066	2.07951	3.74345	3.15661	2.94639
ENSAMEG00000000498	GL192438.1	+	1858543	1908181	5976	903	1237	1098	1606	872	699	1236	50	1440	907	2183	1873	1577	2324	1903	2177	4915	2939	4687	3462	1054	639	1787	1936	1149	8.86341	13.4915	11.1413	16.0394	8.23684	6.2727	10.2357	0.449964	15.1303	7.09774	26.6594	23.3059	19.4246	25.7537	18.3113	22.4651	62.5462	35.7611	53.7121
ENSAMEG00000000499	GL192936.1	-	822634	844490	957	91	82	68	157	89	224	245	292	141	390	437	383	413	564	697	358	284	364	376	433	184	156	285	324	243	5.57767	5.58473	4.30863	9.79129	5.24968	12.5523	12.6696	16.4093	9.25127	19.058	33.3255	29.7595	31.7664	39.0285	41.8806	23.0692	22.5681	27.6574	26.9069
ENSAMEG00000000500	GL192386.1	+	879965	880330	348	0	0	0	0	0	0	0	0	0	0	0	2	1	0	0	0	0	0	0	0	0	0	0	0	0	0	0	0	0	0	0	0	0	0	0	0	0.427356	0.21152	0	0	0	0	0	0
ENSAMEG00000000501	GL192386.1	+	892950	971470	1953	115	143	148	257	169	279	534	60	523	379	669	404	573	637	848	547	810	615	886	769	298	153	460	368	326	3.45398	4.77237	4.59517	7.85386	4.88472	7.66108	13.5316	1.65222	16.8149	9.07529	24.9995	15.3822	21.5965	21.5999	24.9681	17.2721	31.5407	22.8979	31.0684
ENSAMEG00000000502	GL192794.1	-	589664	590222	234	0	0	0	0	0	0	0	0	0	0	0	0	1	0	0	0	0	0	0	1	2	3	4	0	1	0	0	0	0	0	0	0	0	0	0	0	0	0.314568	0	0	0	0	0	0
ENSAMEG00000000503	GL192794.1	+	644969	653857	1902	109	70	82	66	87	122	82	12	86	55	561	464	391	299	471	342	240	340	266	275	202	179	233	182	144	3.36155	2.39877	2.61424	2.07103	2.58204	3.43983	2.1336	0.339304	2.83911	1.35231	21.5258	18.1404	15.132	10.4106	14.2397	11.0886	9.59597	12.9984	9.57764
ENSAMEG00000000504	GL192519.1	-	314234	345085	2574	158	86	153	130	144	99	71	7	61	69	574	290	313	338	592	531	249	352	319	588	284	58	494	147	249	3.60058	2.17766	3.60433	3.0143	3.15798	2.0626	1.36508	0.146254	1.48804	1.25362	16.2746	8.37777	8.95089	8.69606	13.2253	12.7217	7.35663	9.94389	8.4873
ENSAMEG00000000505	GL192549.1	+	1952056	2051365	1170	151	162	64	140	28	66	278	4	180	18	183	303	105	162	119	284	124	76	122	147	59	68	33	321	23	7.57033	9.02463	3.31693	7.14158	1.35091	3.02514	11.7589	0.183862	9.66009	0.719466	11.4149	19.2573	6.60593	9.16945	5.84861	14.969	8.05979	4.72335	7.14104
ENSAMEG00000000506	GL192549.1	+	2079534	2098575	882	129	157	172	168	141	63	55	64	44	47	65	172	185	346	97	80	142	167	163	120	116	119	204	150	123	8.57916	11.602	11.825	11.3682	9.02413	3.83054	3.08605	3.90238	3.13241	2.49203	5.37838	14.501	15.4395	25.979	6.32404	5.59348	12.2436	13.768	12.6563
ENSAMEG00000000507	GL192667.1	-	268972	274454	192	9	1	3	1	5	22	10	89	8	35	9	2	6	4	12	38	16	111	4	35	83	79	126	11	171	2.74957	0.339468	0.947463	0.31085	1.47002	6.14482	2.57755	24.9291	2.61627	8.52492	3.42096	0.774583	2.30028	1.37966	3.59395	12.2052	6.33734	42.0382	1.42674
ENSAMEG00000000508	GL192819.1	+	45002	134523	3087	273	157	199	148	146	59	32	0	20	36	337	271	179	168	294	552	243	250	233	354	618	466	809	419	358	5.1874	3.31484	3.90894	2.86139	2.66975	1.02495	0.513005	0	0.406806	0.545368	7.9671	6.52787	4.26822	3.60402	5.47649	11.0272	5.98629	5.88878	5.169
ENSAMEG00000000509	GL192667.1	+	279622	291427	1398	8	5	1	0	5	12	7	8	8	3	5	8	2	1	2	15	17	9	11	19	4	13	5	5	3	0.335665	0.233111	0.0433746	0	0.201891	0.460322	0.247799	0.307752	0.359317	0.100355	0.261018	0.425522	0.105306	0.0473704	0.0822649	0.661675	0.924762	0.46812	0.538856
ENSAMEG00000000510	GL192819.1	+	213978	222400	2007	3	8	9	3	5	8	3	0	1	3	38	12	23	16	16	136	63	196	56	141	101	52	184	25	82	0.0876794	0.259802	0.271918	0.0892126	0.14063	0.213762	0.0739746	0	0.0312858	0.0699033	1.38179	0.444603	0.84355	0.527943	0.458421	4.17881	2.38716	7.10118	1.91086
ENSAMEG00000000511	GL192909.1	+	1022289	1033829	1257	30	5	7	42	46	36	167	20	108	70	761	344	409	426	973	318	172	130	241	344	57	42	53	48	77	1.39994	0.25926	0.33768	1.99419	2.06575	1.53587	6.57491	0.855683	5.39489	2.60427	44.1831	20.3499	23.9507	22.4434	44.5112	15.601	10.4059	7.52021	13.1301
ENSAMEG00000000512	GL193394.1	-	342009	485486	3081	308	1032	392	2577	488	145	321	8	412	187	4613	4249	2652	4728	6156	1574	2781	1917	3015	1490	411	465	452	4796	489	5.86385	21.8317	7.71501	49.92	8.94094	2.52385	5.15611	0.139642	8.39653	2.8384	109.269	102.55	63.3596	101.625	114.894	31.5046	68.6432	45.2431	67.0167
ENSAMEG00000000513	GL192819.1	-	239780	394855	626	8	1	0	6	1	9	6	1	0	5	30	28	6	10	13	219	54	35	32	45	15	27	8	1	3	0.749617	0.104118	0	0.572043	0.0901738	0.771003	0.474335	0.0859101	0	0.373525	3.49747	3.326	0.705517	1.05789	1.19415	21.574	6.56006	4.06552	3.50077
ENSAMEG00000000514	GL195285.1	-	16385	17950	1338	0	0	0	0	0	0	0	0	0	0	1	2	1	0	0	0	1	0	0	1	10	13	5	3	6	0	0	0	0	0	0	0	0	0	0	0.0545445	0.111151	0.0550141	0	0	0	0.0568371	0	0
ENSAMEG00000000515	GL192819.1	+	454933	458567	510	60	28	27	19	19	141	98	55	71	100	7	10	16	12	31	59	26	47	34	52	75	185	115	73	75	6.90088	3.57839	3.21023	2.22349	2.103	14.8264	9.50965	5.79977	8.74143	9.16967	1.00169	1.45804	2.3093	1.55821	3.49529	7.13416	3.87696	6.70116	4.56558
ENSAMEG00000000516	GL193373.1	+	170723	179451	1278	849	838	773	1238	626	571	775	555	695	474	1084	1040	1218	1034	1339	1582	1677	1511	2161	1488	2042	3270	2332	1107	2074	38.9673	42.7379	36.6767	57.8152	27.6502	23.9603	30.0109	23.355	34.1467	17.3449	61.9021	60.512	70.1531	53.5802	60.2478	76.3372	99.7908	85.9717	115.801
ENSAMEG00000000517	GL195032.1	+	1310	40128	1713	130	450	262	564	163	124	185	169	223	163	418	337	463	480	627	415	809	409	810	572	402	263	621	850	681	2.90163	11.1606	6.0453	12.8087	3.5012	2.53037	3.48381	3.45844	5.32812	2.90059	11.608	9.5355	12.9684	12.0957	13.7194	9.73831	23.4105	11.3167	21.108
ENSAMEG00000000518	GL193349.1	+	306252	482404	7173	113	48	28	40	50	71	77	0	48	32	290	373	114	216	190	932	125	94	232	369	72	65	55	54	56	0.984157	0.464519	0.252094	0.354466	0.419071	0.565339	0.565799	0	0.447505	0.222196	3.14244	4.11823	1.24594	2.12388	1.62221	8.53374	1.41143	1.01487	2.35905
ENSAMEG00000000519	GL192374.1	-	2468503	2568134	1154	22	9	16	18	15	2	0	0	1	0	3	2	4	1	8	7	8	7	6	3	299	127	131	22	294	1.11825	0.50832	0.84073	0.930934	0.733737	0.092942	0	0	0.0544112	0	0.189724	0.128873	0.255143	0.0573863	0.398635	0.37407	0.527196	0.441077	0.356068
ENSAMEG00000000520	GL192374.1	+	2616506	2838863	1449	139	133	132	263	172	139	213	149	195	264	233	191	321	393	462	405	436	534	515	558	224	298	482	353	494	5.62691	5.98251	5.52392	10.8328	6.70062	5.14439	7.27478	5.53014	8.45008	8.52038	11.7353	9.80176	16.3067	17.9613	18.3343	17.2364	22.8826	26.7975	24.3403
ENSAMEG00000000521	GL192936.1	-	861109	909784	1289	507	384	699	455	623	18	50	5	27	11	49	65	51	132	62	90	52	51	45	129	345	297	356	145	574	23.0717	19.4168	32.8826	21.0674	27.2829	0.748872	1.91967	0.20861	1.31524	0.399083	2.77428	3.74972	2.91238	6.78165	2.76586	4.30577	3.06788	2.877	2.39082
ENSAMEG00000000522	GL193349.1	+	385623	390450	537	240	182	93	219	155	13	46	0	49	7	25	115	39	111	25	79	82	34	103	51	12	28	26	48	9	26.2156	22.0901	10.5015	24.3401	16.2934	1.29825	4.23928	0	5.72949	0.609603	3.3976	15.9244	5.3459	13.6887	2.67706	9.07222	11.6126	4.60391	13.1356
ENSAMEG00000000523	GL192388.1	+	767412	818221	1779	0	0	1	2	0	2782	2477	8939	1973	2665	0	0	3	0	0	0	0	6	0	0	287	325	607	96	355	0	0	0.0340852	0.0670975	0	83.8627	68.9063	270.229	69.6379	70.0559	0	0	0.12413	0	0	0	0	0.245243	0
ENSAMEG00000000524	GL192794.1	+	659638	667155	1440	1187	541	631	625	672	1366	1330	2014	948	707	1756	1845	1466	1576	1730	2443	1247	1186	1478	1398	1557	2054	1003	797	1135	48.3517	24.487	26.5711	25.9042	26.3428	50.8717	45.7086	75.2169	41.3371	22.9605	88.9957	95.2737	74.9379	72.4783	69.0837	104.622	65.8555	59.8886	70.291
ENSAMEG00000000525	GL196427.1	+	476	5178	1260	0	1	0	0	0	0	0	0	0	0	0	0	0	0	0	0	1	0	0	1	0	0	0	0	0	0	0.0517285	0	0	0	0	0	0	0	0	0	0	0	0	0	0	0.0603556	0	0
ENSAMEG00000000526	GL193595.1	-	35709	45930	531	300	262	413	257	363	343	471	761	297	399	499	425	762	440	726	465	243	606	315	423	429	705	726	838	542	33.1398	32.1593	47.1626	28.8862	38.5893	34.6408	43.897	77.0741	35.1201	35.14	68.5825	59.5159	105.631	54.8747	78.6201	54.0032	34.8017	82.9851	40.6259
ENSAMEG00000000527	GL192438.1	-	1931689	2208095	2843	0	0	1	2	1	14	14	4	5	13	2	2	3	1	1	12	15	12	15	17	87	7	168	4	58	0	0	0.0213287	0.0419861	0.0198554	0.264082	0.243702	0.0756661	0.11043	0.213841	0.0513405	0.0523109	0.0776738	0.0232936	0.0202262	0.260295	0.401238	0.306921	0.361328
ENSAMEG00000000528	GL193373.1	+	181570	191587	2145	116	76	30	58	65	85	122	7	64	39	260	241	154	161	173	302	135	123	142	168	211	484	185	98	103	3.17215	2.30933	0.848079	1.61381	1.71057	2.1251	2.81476	0.175505	1.87347	0.850278	8.84613	8.35466	5.28474	4.97065	4.63778	8.68241	4.78624	4.16965	4.53366
ENSAMEG00000000529	GL193595.1	-	48737	110723	2316	21	6	17	14	11	23	5	5	10	26	13	6	13	16	15	45	36	95	15	57	53	46	93	4	94	0.531869	0.168855	0.445095	0.360779	0.268108	0.532571	0.106842	0.116105	0.271116	0.524999	0.409649	0.192642	0.413176	0.457505	0.37243	1.19822	1.18209	2.98268	0.443548
ENSAMEG00000000530	GL194167.1	-	66069	101298	624	3	21	12	1	3	1	0	0	0	3	1	2	0	2	1	0	2	0	0	2	7	2	13	0	2	0.282007	2.19349	1.16611	0.0956462	0.271389	0.0859416	0	0	0	0.224833	0.116956	0.238333	0	0.212256	0.0921525	0	0.243744	0	0
ENSAMEG00000000531	GL192819.1	+	556802	599974	3813	457	470	559	688	415	353	526	33	499	276	1547	1094	1109	1501	1731	1563	1693	1390	1902	1621	741	544	1152	1068	783	7.03029	8.03399	8.8897	10.769	6.14379	4.96473	6.82696	0.465442	8.21728	3.38506	29.6095	21.3348	21.4089	26.0692	26.1049	25.2786	33.7659	26.5076	34.161
ENSAMEG00000000532	GL193472.1	-	227611	395816	1584	27	11	49	22	39	49	17	26	13	70	151	59	90	101	223	81	34	87	51	91	79	16	129	38	112	1.16624	0.52795	2.18796	0.966885	1.62114	1.93501	0.619524	1.02966	0.601088	2.41058	8.11492	3.23066	4.87835	4.92534	9.44271	3.67829	1.904	4.65845	2.57192
ENSAMEG00000000533	GL194506.1	+	19662	30089	528	307	332	246	330	223	26	30	15	39	46	332	442	429	563	509	295	429	470	479	286	138	146	263	340	178	34.1058	40.9831	28.2516	37.302	23.8411	2.64075	2.81187	1.52783	4.63794	4.07425	45.8893	62.2483	59.8072	70.6137	55.4339	34.4547	61.789	64.7271	62.1282
ENSAMEG00000000535	GL192438.1	+	2247310	2278156	714	2	5	9	18	7	8	18	3	5	27	11	84	16	208	14	1652	534	1502	691	3039	1423	1308	3675	156	2091	0.164307	0.456428	0.76434	1.50462	0.55342	0.600869	1.24762	0.225965	0.43971	1.76844	1.12435	8.74823	1.6495	19.2921	1.12751	142.683	56.8763	152.966	66.2777
ENSAMEG00000000536	GL193394.1	+	588134	646984	2823	0	0	0	0	0	0	0	0	0	0	9	2	12	5	24	0	0	0	0	0	0	0	0	0	0	0	0	0	0	0	0	0	0	0	0	0.232669	0.0526815	0.312896	0.117293	0.488868	0	0	0	0
ENSAMEG00000000537	GL193349.1	-	500106	669626	582	1	2	1	2	0	2	4	1	0	0	15	10	5	3	4	11	13	3	5	4	4	6	3	4	4	0.0828496	0.184118	0.0856464	0.168597	0	0.15149	0.279599	0.07596	0	0	1.5462	1.05028	0.519837	0.280609	0.324877	0.958121	1.39636	0.308113	0.483642
ENSAMEG00000000538	GL193091.1	-	172756	201734	834	4758	4666	4832	4522	4976	1807	2949	7314	1830	2325	1137	921	1232	1122	1645	1192	1062	1275	1062	1458	4540	7806	5464	2418	6081	334.643	364.652	351.32	323.606	336.798	116.193	174.992	471.636	137.778	130.371	99.495	82.1169	108.736	89.0925	113.42	88.1396	96.8382	111.165	87.2059
ENSAMEG00000000539	GL194086.1	-	126825	203504	1290	0	0	0	1	0	0	2	1	0	5	79	23	67	30	90	18	9	13	4	11	5	0	3	0	1	0	0	0	0.046266	0	0	0.0767271	0.0416897	0	0.181261	4.46935	1.3258	3.8231	1.54009	4.01185	0.860486	0.530568	0.732784	0.212353
ENSAMEG00000000540	GL192667.1	-	302778	340608	1455	182	106	197	182	136	200	341	106	261	145	385	444	295	670	461	510	488	453	498	565	265	210	533	343	371	7.33723	4.74835	8.21004	7.46553	5.27632	7.37148	11.5985	3.91797	11.2635	4.66046	19.311	22.6913	14.9241	30.4948	18.2192	21.6156	25.5062	22.639	23.4398
ENSAMEG00000000541	GL192936.1	+	1022623	1086342	2181	237	316	109	275	220	17	17	5	17	35	164	82	163	77	179	322	238	186	267	407	527	285	705	102	496	6.37406	9.44347	3.03049	7.52539	5.69406	0.418005	0.385746	0.123291	0.489427	0.750475	5.48776	2.79574	5.50126	2.33803	4.71942	9.1046	8.29869	6.20125	8.38384
ENSAMEG00000000542	GL193649.1	+	67195	97623	2379	497	275	491	242	450	309	366	78	267	517	450	265	413	376	509	456	289	386	264	560	353	206	611	271	568	12.2542	7.53422	12.515	6.07118	10.6776	6.96549	7.61369	1.76327	7.04711	10.1629	13.8046	8.28305	12.7787	10.4667	12.3031	11.8204	9.23829	11.7982	7.59971
ENSAMEG00000000543	GL194506.1	-	46366	67343	1113	1181	1488	929	1298	881	56	49	13	25	61	269	282	432	346	341	261	292	395	406	262	44	101	139	151	75	62.2413	87.1381	50.6131	69.6036	44.6823	2.69824	2.17876	0.628155	1.41039	2.56306	17.6386	18.8405	28.5706	20.5871	17.6178	14.4613	19.9515	25.8062	24.9815
ENSAMEG00000000544	GL192524.1	-	879848	940083	2343	438	323	305	367	519	465	534	128	389	719	462	277	354	377	589	433	404	437	359	627	489	349	565	450	732	10.9654	8.98526	7.8935	9.34859	12.504	10.6431	11.2792	2.93803	10.4249	14.3509	14.3905	8.79116	11.1214	10.6557	14.4556	11.3966	13.1129	13.5622	10.4932
ENSAMEG00000000545	GL192374.1	+	2926124	3047220	1140	66	45	20	66	68	9	35	15	34	17	45	44	86	103	82	103	109	185	125	135	159	146	308	91	180	3.39596	2.57281	1.06382	3.45534	3.36712	0.423375	1.5194	0.707628	1.8727	0.697377	2.88081	2.87003	5.55295	5.98338	4.13619	5.57177	7.27126	11.8002	7.50918
ENSAMEG00000000546	GL193998.1	-	359290	389488	675	1825	2005	4213	1704	2448	0	0	0	0	0	78	32	116	61	154	0	6	9	14	5	0	0	1	0	1	158.593	193.602	378.469	150.667	204.721	0	0	0	0	0	8.43331	3.52521	12.6498	5.98467	13.1192	0	0.675983	0.969529	1.4204
ENSAMEG00000000547	GL192548.1	+	1215609	1601891	1914	0	0	0	0	0	0	0	0	0	0	0	1	0	0	0	8	1	4	0	5	2	4	2	0	4	0	0	0	0	0	0	0	0	0	0	0	0.0623302	0	0	0	0.413533	0.0637452	0.243804	0
ENSAMEG00000000548	GL192794.1	+	671483	673874	1038	85	13	80	50	92	40	38	240	40	61	68	62	149	93	205	113	55	160	112	131	141	109	218	80	213	4.80336	0.816293	4.67342	2.87491	5.00317	2.06657	1.81174	12.4346	2.41967	2.74825	4.781	4.44154	10.5662	5.93335	11.3566	6.71339	4.02952	11.2084	7.38938
ENSAMEG00000000549	GL193595.1	-	129156	142754	387	5	5	8	1	9	2	2	3	2	2	4	1	2	2	1	14	16	22	6	21	17	6	22	3	10	0.757849	0.842091	1.25349	0.15422	1.31276	0.277145	0.255757	0.416897	0.324499	0.241681	0.754321	0.192145	0.380408	0.342242	0.148587	2.23089	3.14411	4.13365	1.06176
ENSAMEG00000000550	GL193472.1	+	413844	534116	1047	39	3	10	4	31	11	3	3	2	20	8	2	3	10	14	28	39	77	2	48	37	23	60	0	112	2.18495	0.186756	0.579156	0.228016	1.67136	0.563422	0.141802	0.154097	0.119944	0.89332	0.557635	0.142044	0.210914	0.63251	0.768906	1.6492	2.83274	5.34769	0.130819
ENSAMEG00000000551	GL192388.1	-	855683	947665	2349	3	0	0	0	0	4	0	0	1	4	0	0	0	0	1	1	1	3	1	2	8	1	13	3	12	0.0921322	0	0	0	0	0.112309	0	0	0.0328746	0.0979378	0	0	0	0	0.0301064	0.032287	0.0398157	0.114212	0.0358554
ENSAMEG00000000552	GL194670.1	-	44148	45238	573	0	0	0	0	0	0	0	0	0	0	0	0	0	0	0	0	0	0	0	0	0	0	0	0	0	0	0	0	0	0	0	0	0	0	0	0	0	0	0	0	0	0	0	0
ENSAMEG00000000553	GL192386.1	-	985127	992653	699	0	0	0	0	0	1	0	0	1	0	0	3	1	0	1	1	2	0	0	0	0	0	0	0	1	0	0	0	0	0	0.0767204	0	0	0.0898291	0	0	0.319141	0.105306	0	0.0822649	0.0882234	0.217591	0	0
ENSAMEG00000000554	GL193595.1	-	164832	167680	954	311	68	210	84	230	699	473	445	271	791	508	260	418	248	537	939	304	538	270	984	663	464	691	209	693	19.1221	4.6458	13.3479	5.25512	13.6093	39.2931	24.537	25.0859	17.8367	38.775	38.8618	20.2658	32.2521	17.2154	32.3681	60.6985	24.2333	41.0068	19.3822
ENSAMEG00000000555	GL194601.1	-	66864	75115	1230	0	0	0	0	0	0	0	0	0	0	1	0	2	0	0	7	6	3	10	11	11	0	14	0	9	0	0	0	0	0	0	0	0	0	0	0.0593338	0	0.119689	0	0	0.350957	0.370966	0.177353	0.556778
ENSAMEG00000000556	GL192374.1	-	3078259	3109585	3162	48	4	11	5	34	66	16	0	12	46	62	28	31	29	54	66	21	31	14	65	34	35	44	14	35	0.903292	0.0836418	0.213992	0.0957382	0.61574	1.13552	0.254034	0	0.241735	0.690152	1.45165	0.667975	0.732074	0.616134	0.996205	1.30577	0.512355	0.723181	0.307595
ENSAMEG00000000557	GL193437.1	+	129340	276256	3357	50	24	17	63	139	0	7	0	4	1	22	14	0	10	26	2	4	3	1	3	75	19	81	14	61	0.87366	0.465972	0.307072	1.12006	2.33732	0	0.103194	0	0.0748175	0.0139307	0.478276	0.31011	0	0.197271	0.445363	0.03674	0.0906143	0.0649818	0.0204003
ENSAMEG00000000558	GL192386.1	+	1001946	1003637	297	0	0	0	0	0	0	0	0	0	0	8	7	13	21	16	0	1	4	1	3	1	0	0	0	0	0	0	0	0	0	0	0	0	0	0	1.96581	1.75259	3.22194	4.68249	3.09781	0	0.256054	0.979322	0.230585
ENSAMEG00000000559	GL192386.1	-	1017306	1019640	318	0	1	0	0	0	0	0	0	0	0	0	3	3	3	1	1	0	2	1	0	1	0	2	0	2	0	0.204962	0	0	0	0	0	0	0	0	0	0.701509	0.694424	0.624753	0.180828	0.193925	0	0.457325	0.215358
ENSAMEG00000000560	GL193595.1	+	168110	192996	1098	29	20	33	13	30	37	13	13	13	37	27	19	16	30	25	77	41	134	9	84	507	458	722	79	700	1.54924	1.18721	1.82244	0.706632	1.54232	1.80712	0.585935	0.636736	0.743422	1.57588	1.7946	1.28674	1.07263	1.80939	1.30927	4.32463	2.83968	8.8741	0.561342
ENSAMEG00000000561	GL192386.1	-	1034013	1100568	1208	428	470	907	649	414	208	1078	2845	1217	330	618	1547	1742	2388	888	174	1093	1261	1373	240	1056	3206	2457	1358	1632	20.7826	25.3589	45.5284	32.0649	19.3459	9.23388	44.1632	126.658	63.2584	12.7753	37.3361	95.2275	106.148	130.913	42.2705	8.88266	68.8084	75.905	77.8379
ENSAMEG00000000562	GL192548.1	+	2005175	2016236	1175	0	0	0	0	0	0	0	0	0	0	0	0	0	0	0	1	0	0	0	0	0	1	0	0	0	0	0	0	0	0	0	0	0	0	0	0	0	0	0	0	0.0524835	0	0	0
ENSAMEG00000000563	GL192794.1	+	677563	682187	261	10382	8501	10429	8599	10961	2684	3805	8591	2380	4874	1134	860	1559	1173	2078	1735	955	1941	1453	2105	3973	7033	5349	3952	5722	2333.27	2122.9	2422.95	1966.34	2370.63	551.48	721.478	1770.2	572.573	873.31	317.088	245.017	439.679	297.627	457.822	409.94	278.26	540.763	381.252
ENSAMEG00000000564	GL194235.1	+	235505	265005	1226	258	204	169	186	276	1539	767	1153	550	1501	212	215	162	185	218	223	69	116	75	200	728	712	665	363	849	12.3439	10.8453	8.35869	9.05471	12.7079	67.3187	30.9609	50.5775	28.1687	57.2551	12.6198	13.0403	9.72646	9.99299	10.2249	11.217	4.28003	6.88002	4.18946
ENSAMEG00000000565	GL192438.1	+	2446531	2687983	1962	43	5	9	54	49	13	2	10	2	11	9	1	8	4	9	364	37	207	42	456	58	9	58	7	53	1.28556	0.166101	0.278154	1.64266	1.40978	0.35533	0.0504475	0.274107	0.0640067	0.262191	0.334773	0.0379001	0.300138	0.135013	0.263776	11.441	1.43414	7.67173	1.46601
ENSAMEG00000000566	GL192548.1	+	2024046	2092324	1389	1	0	0	0	0	1	0	2	0	0	0	0	0	0	0	0	0	0	0	0	0	0	1	0	1	0.04223	0	0	0	0	0.0386087	0	0.0774366	0	0	0	0	0	0	0	0	0	0	0
ENSAMEG00000000567	GL192794.1	+	695454	702784	786	14	1	13	2	8	1	4	0	0	0	6	5	8	4	9	230	58	82	57	202	13	39	7	1	6	1.04479	0.0829235	1.00291	0.151866	0.574543	0.0682284	0.251852	0	0	0	0.557103	0.473028	0.7492	0.337017	0.658433	18.0454	5.61169	7.58601	4.96638
ENSAMEG00000000568	GL193472.1	-	440002	440814	786	0	0	0	0	0	0	0	0	0	0	0	0	0	0	0	0	0	0	0	0	0	0	0	0	0	0	0	0	0	0	0	0	0	0	0	0	0	0	0	0	0	0	0	0
ENSAMEG00000000569	GL193285.1	-	205549	211268	1260	404	141	243	118	311	668	305	172	235	699	397	194	296	195	402	346	219	255	237	268	468	474	498	243	477	18.8076	7.29371	11.6944	5.58938	13.933	28.4311	11.9795	7.34136	11.7109	25.9436	22.9947	11.4491	17.2922	10.2489	18.3462	16.9343	13.2179	14.7161	12.8815
ENSAMEG00000000570	GL193437.1	-	286563	310207	2928	277	212	227	262	198	457	300	163	230	462	681	631	709	781	904	883	518	774	514	994	454	308	744	377	615	5.54922	4.71916	4.70107	5.34051	3.81724	8.37015	5.07059	2.99388	4.93232	7.37895	16.974	16.025	17.824	17.6642	17.7537	18.5973	13.4539	19.2217	12.0221
ENSAMEG00000000571	GL192386.1	+	1132264	1189673	1371	481	953	1006	1568	401	590	1616	614	1715	500	2297	5326	3455	7798	2933	1175	6243	2879	7766	1486	1392	3915	2487	2619	1848	20.5793	45.306	44.4941	68.2591	16.5106	23.0782	58.3328	24.0851	78.5455	17.0552	122.273	288.87	185.499	376.669	123.017	52.852	346.293	152.696	387.925
ENSAMEG00000000572	GL193373.1	+	198927	222792	9915	4	12	0	6	2	0	5	0	2	2	13	16	7	12	4	21	35	24	34	9	9	4	5	15	6	0.0236641	0.078884	0	0.0361169	0.0113866	0	0.0249566	0	0.0126658	0.00943324	0.095688	0.119996	0.051968	0.0801499	0.0231984	0.130613	0.26845	0.176011	0.234841
ENSAMEG00000000573	GL192519.1	-	370227	395895	2577	88	56	122	50	64	75	215	37	179	114	774	425	530	602	832	511	325	571	341	673	216	48	350	89	182	2.01242	1.42299	2.88413	1.16342	1.40847	1.56806	4.1482	0.775769	4.38188	2.07846	22.0222	12.3208	15.2096	15.5426	18.6521	12.2855	9.63572	16.1872	9.10447
ENSAMEG00000000574	GL192667.1	-	385427	427444	1173	81	65	63	128	62	231	567	129	389	181	39	110	60	124	42	780	1115	452	1118	674	558	704	705	256	575	4.05052	3.61173	3.25675	6.51275	2.98366	10.5609	23.9218	5.91439	20.8231	7.21613	2.42646	6.97322	3.76516	7.00064	2.05894	41.0069	72.2878	28.0196	65.2727
ENSAMEG00000000575	GL192374.1	+	3114547	3124458	414	287	104	134	119	302	5180	10779	23576	6441	10284	196	98	221	133	416	285	140	320	147	322	7388	9711	7326	1688	12177	40.6635	16.3732	19.6267	17.1553	41.1776	670.992	1288.51	3062.58	976.894	1161.68	34.5512	17.6021	39.2936	21.2748	57.7809	42.4527	25.7167	56.2046	24.3167
ENSAMEG00000000576	GL193394.1	+	663252	694441	1095	366	253	332	191	281	0	1	0	2	2	7	4	4	1	16	14	1	4	4	23	19	16	3	8	43	19.6061	15.0594	18.3851	10.4105	14.486	0	0.0451954	0	0.114686	0.0854161	0.466542	0.271634	0.268891	0.0604784	0.840229	0.788451	0.0694503	0.265624	0.250169
ENSAMEG00000000577	GL192388.1	-	957229	1281398	1341	639	1330	617	1184	396	790	561	195	292	560	566	634	449	552	567	1464	1275	950	1426	1145	907	1142	1140	577	758	27.9509	64.6432	27.8996	52.6957	16.6695	31.5927	20.7035	7.82031	13.6725	19.5291	30.8031	35.156	24.6461	27.2599	24.3134	67.3245	72.3052	51.513	72.8246
ENSAMEG00000000578	GL193091.1	-	214093	256892	2161	46	12	8	32	2	5	5	2	5	7	107	92	62	99	100	159	78	151	65	141	27	19	30	36	17	1.24861	0.361932	0.22448	0.883786	0.0522432	0.12408	0.114505	0.049773	0.145281	0.151484	3.61357	3.16572	2.11187	3.03385	2.66095	4.53736	2.74491	5.08094	2.0599
ENSAMEG00000000579	GL193595.1	-	204458	233133	1185	63	48	50	55	47	12	19	5	15	7	80	55	43	37	84	132	80	67	85	118	56	68	80	49	71	3.1185	2.64012	2.55855	2.77011	2.2389	0.543064	0.793494	0.226919	0.794817	0.276251	4.92696	3.4513	2.67104	2.06775	4.07617	6.86936	5.13405	4.11129	4.91234
ENSAMEG00000000580	GL192936.1	-	1093256	1093917	219	84	58	124	45	152	41	21	70	12	78	62	14	49	20	115	60	8	67	13	55	129	81	201	21	205	22.4988	17.2617	34.3336	12.2637	39.1791	10.0399	4.74552	17.1899	3.44058	16.6561	20.6612	4.7536	16.4696	6.04784	30.1957	16.8954	2.77801	22.246	4.06524
ENSAMEG00000000581	GL192936.1	-	1098815	1164719	10044	457	265	245	374	402	942	690	7	615	429	1539	1513	1020	1555	1542	895	507	535	552	935	513	194	631	763	428	2.66891	1.71965	1.47911	2.22237	2.2593	5.02958	3.39978	0.0374809	3.8447	1.99744	11.1825	11.2014	7.47522	10.2527	8.82814	5.49512	3.83875	3.87319	3.76374
ENSAMEG00000000582	GL194506.1	+	107108	146152	1458	1528	1908	2067	1638	1343	380	562	183	428	405	618	275	447	423	829	718	511	666	562	945	654	643	842	518	729	61.4737	85.2945	85.9657	67.0515	51.9964	13.977	19.076	6.75013	18.4323	12.9904	30.9341	14.0254	22.5673	19.2131	32.6956	30.3688	26.6533	33.2153	26.3977
ENSAMEG00000000583	GL193472.1	+	478721	481098	1719	88	117	94	177	92	112	193	104	126	115	165	192	149	232	229	185	162	130	151	171	107	204	172	312	137	3.00283	4.43619	3.31584	6.14539	3.02111	3.49406	5.55636	3.25369	4.60245	3.12857	7.00511	8.30547	6.38029	8.93771	7.6604	6.63677	7.16683	5.49907	6.01573
ENSAMEG00000000584	GL192389.1	+	3171746	3175413	1635	0	7	0	1	2	0	0	0	0	0	0	0	0	0	2	0	20	6	0	0	6	2	8	0	9	0	0.279049	0	0.0365035	0.0690506	0	0	0	0	0	0	0	0	0	0.0703403	0	0.930251	0.266843	0
ENSAMEG00000000585	GL193433.1	-	149629	153247	1383	318	70	228	54	294	238	94	66	63	385	114	63	129	98	128	169	81	182	79	183	298	155	475	87	410	13.4874	3.29895	9.99666	2.33036	12	9.22874	3.36368	2.56649	2.86031	13.0185	6.01575	3.38733	6.86591	4.69265	5.32206	7.53573	4.45401	9.5691	3.91194
ENSAMEG00000000586	GL193285.1	+	526928	634465	771	1	3	1	4	2	2	2	0	1	2	2	9	8	5	6	191	192	159	188	176	5	6	7	22	5	0.0760798	0.25361	0.078648	0.30964	0.14643	0.139112	0.128376	0	0.0814404	0.121311	0.189314	0.868015	0.763776	0.429467	0.447495	15.2771	18.938	14.9956	16.699
ENSAMEG00000000587	GL193394.1	+	697488	698817	1248	0	0	0	0	0	0	0	0	0	0	0	0	0	0	0	0	0	0	0	0	0	0	0	0	0	0	0	0	0	0	0	0	0	0	0	0	0	0	0	0	0	0	0	0
ENSAMEG00000000588	GL193433.1	+	158682	214550	1965	228	133	306	132	247	369	219	90	141	622	406	298	419	383	567	337	273	475	281	538	537	220	769	134	839	6.80606	4.41153	9.44281	4.00925	7.0956	10.0705	5.51557	2.46319	4.50558	14.8031	15.0789	11.277	15.6957	12.9077	16.5925	10.5762	10.5655	17.5773	9.79335
ENSAMEG00000000589	GL192794.1	+	723575	725701	1464	4	0	2	0	0	1	11	0	3	0	55	43	62	40	83	52	22	20	25	42	4	1	14	1	3	0.160266	0	0.0828383	0	0	0.0366308	0.371844	0	0.128669	0	2.74176	2.18407	3.11732	1.80939	3.26008	2.1904	1.1428	0.99337	1.16946
ENSAMEG00000000590	GL192794.1	-	747257	749139	1038	79	45	40	39	59	62	64	200	46	63	176	146	200	162	207	251	180	195	186	294	125	142	149	75	156	4.4643	2.82563	2.33671	2.24243	3.20856	3.20319	3.05134	10.3622	2.78263	2.83836	12.3743	10.4591	14.1828	10.3355	11.4674	14.912	13.1875	13.6603	12.2717
ENSAMEG00000000591	GL193595.1	+	303826	422160	1866	125	122	159	205	139	113	265	39	242	96	255	258	230	446	411	334	337	271	406	386	176	130	285	365	221	3.93147	4.26365	5.16964	6.56035	4.20718	3.24928	7.03195	1.12462	8.14762	2.40722	9.97857	10.2868	9.07777	15.8369	12.6723	11.0441	13.7417	10.566	14.9085
ENSAMEG00000000592	GL192794.1	-	750116	752096	663	687	490	477	404	466	220	145	142	115	165	629	441	575	458	639	421	220	372	263	390	325	318	277	162	244	60.7809	48.1707	43.6262	36.368	39.6759	17.795	10.8234	11.5184	10.8913	11.6384	69.2379	49.4611	63.8388	45.7474	55.4216	39.1588	25.2346	40.7992	27.1663
ENSAMEG00000000593	GL192524.1	+	948030	953452	780	2442	1958	3229	2528	2897	1521	1721	6347	1482	2478	1195	768	2684	1320	2498	1392	763	2166	950	1910	1501	1948	3257	3058	2302	183.643	163.613	251.024	193.435	209.657	104.574	109.193	437.615	119.302	148.57	111.81	73.2159	253.29	112.071	184.158	110.054	74.3906	201.923	83.4097
ENSAMEG00000000594	GL194235.1	+	272273	297942	1494	836	593	646	891	523	1455	1234	1510	937	751	2426	2486	2357	2141	2245	3035	3442	2367	4108	2389	1951	2001	1708	1501	1474	32.8231	25.8705	26.2195	35.5942	19.7609	52.2276	40.8765	54.3557	39.3807	23.5079	118.508	123.734	116.129	94.9031	86.4087	125.276	175.206	115.205	188.307
ENSAMEG00000000595	GL192388.1	+	1341307	1383926	1461	70	51	72	60	76	579	351	101	281	730	233	232	208	279	348	198	163	204	223	267	268	351	327	208	399	2.81042	2.2752	2.9883	2.45106	2.93642	21.2528	11.8896	3.71783	12.0768	23.3666	11.6389	11.808	10.4796	12.6464	13.6969	8.35749	8.48449	10.1532	10.453
ENSAMEG00000000596	GL192389.1	-	3201278	3205856	2589	1	13	0	2	5	0	0	0	0	0	0	0	0	0	1	3	11	4	0	0	1	3	0	2	2	0.0226564	0.327274	0	0.0461052	0.109017	0	0	0	0	0	0	0	0	0	0.0222106	0.0714579	0.323109	0.112344	0
ENSAMEG00000000597	GL192819.1	+	623360	630932	1956	2211	1105	1225	1201	1433	686	941	148	732	338	3814	3636	2849	3115	3034	2735	1695	2397	1720	1926	997	1190	816	2006	521	66.3046	36.8208	37.976	36.646	41.3554	18.808	23.8084	4.06922	23.4983	8.08112	142.305	138.227	107.215	105.464	89.1946	86.2282	65.9005	89.1089	60.2209
ENSAMEG00000000598	GL192905.1	+	43639	90777	1887	117	100	188	242	135	102	178	110	201	98	616	485	677	724	859	444	451	627	677	609	143	176	362	337	178	3.63695	3.45405	6.04127	7.65413	4.03847	2.89879	4.66828	3.13501	6.68834	2.42872	23.8241	19.1121	26.4087	25.4086	26.1766	14.5102	18.1758	24.1612	24.5699
ENSAMEG00000000600	GL193886.1	-	14592	216243	2877	0	2	0	0	1	0	1	0	1	0	7	28	39	58	4	0	4	1	3	1	10	2	1	1	13	0	0.0453096	0	0	0.0196207	0	0.0172016	0	0.021825	0	0.177568	0.723698	0.997826	1.33507	0.0799488	0	0.105732	0.0252745	0.0714116
ENSAMEG00000000601	GL192667.1	-	430089	446447	3603	9	2	3	7	10	715	2486	30	1617	297	31	106	42	265	36	1343	2179	867	1716	1152	908	1182	1638	202	796	0.146522	0.0361798	0.0504893	0.115954	0.156672	10.6422	34.1464	0.447791	28.1799	3.85492	0.62792	2.18766	0.858055	4.87075	0.574553	22.9865	45.9919	17.4975	32.6167
ENSAMEG00000000602	GL193197.1	-	696577	790828	3384	1888	1158	1046	1400	1171	242	1280	101	871	295	1573	2082	1440	1985	1824	1507	1070	1044	1364	1809	207	192	295	581	196	32.7262	22.3038	18.7432	24.6916	19.5336	3.83507	18.7192	1.60513	16.1615	4.07676	33.9239	45.7498	31.3229	38.8458	30.9946	27.4627	24.0459	22.4333	27.604
ENSAMEG00000000603	GL192374.1	-	3135897	3158732	1089	0	1	0	0	1	20	51	3	57	20	14	11	22	27	21	6	3	2	2	7	2	3	3	0	5	0	0.0598511	0	0	0.0518355	0.984895	2.31767	0.148153	3.28656	0.858867	0.938225	0.75111	1.48705	1.64191	1.10888	0.339769	0.209499	0.133544	0.125774
ENSAMEG00000000604	GL193649.1	+	133082	249017	1401	11	1	3	20	20	0	0	0	0	4	42	20	23	30	63	30	7	20	5	33	59	12	101	34	70	0.460551	0.0465224	0.129845	0.852009	0.805836	0	0	0	0	0.13352	2.18785	1.06153	1.20843	1.41807	2.5858	1.32052	0.379969	1.03804	0.24441
ENSAMEG00000000605	GL192374.1	+	3167453	3170784	480	8999	7665	13113	10752	15083	6978	15022	23034	10828	19706	6605	6245	14223	10590	17629	6429	4736	13142	7076	8952	6444	13243	12928	22016	12522	1099.71	1040.81	1656.54	1336.9	1773.79	779.61	1548.8	2580.75	1416.45	1919.91	1004.24	967.454	2181.12	1461.06	2111.92	825.968	750.341	1990.87	1009.56
ENSAMEG00000000606	GL192388.1	+	1493600	1519361	1803	75	183	139	363	56	2156	2573	580	1931	1048	219	562	156	532	204	1249	4120	1242	4819	875	3182	3481	3501	920	2360	2.44	6.61539	4.67478	12.0161	1.75326	64.127	70.6241	17.3002	67.2482	27.1825	8.86452	23.1782	6.36882	19.5403	6.50618	42.7196	173.776	50.0896	183.041
ENSAMEG00000000607	GL192373.1	-	84271	586839	2414	5	9	12	25	18	52	27	3	16	93	633	287	373	318	939	77	36	79	44	178	17	5	56	21	22	0.126909	0.25383	0.314864	0.645643	0.439671	1.20668	0.578193	0.0698135	0.434725	1.88194	19.9899	9.23466	11.8806	9.11258	23.3645	2.05472	1.18465	2.4857	1.30389
ENSAMEG00000000608	GL192524.1	-	958141	997175	2019	38	13	22	26	39	2	0	4	3	4	59	21	14	31	64	87	39	34	27	143	82	31	161	12	121	1.104	0.419669	0.660737	0.76858	1.09039	0.0531229	0	0.106547	0.0932995	0.0926504	2.13267	0.773432	0.510413	1.01681	1.82278	2.65732	1.46898	1.22452	0.91583
ENSAMEG00000000609	GL192374.1	-	3175902	3301005	2880	60	17	42	139	131	29	23	1	29	47	104	75	102	114	107	193	60	108	79	211	725	243	1237	107	672	1.22203	0.384731	0.884299	2.88054	2.56764	0.54	0.395225	0.0186735	0.632266	0.763184	2.63541	1.93646	2.60698	2.62136	2.1364	4.13262	1.58433	2.7268	1.87855
ENSAMEG00000000610	GL192905.1	-	95834	100868	2151	9	2	5	2	8	277	632	4	481	109	163	174	117	98	92	136	60	80	72	101	1069	933	520	80	642	0.245429	0.0606024	0.140952	0.0554934	0.209945	6.90601	14.5407	0.100009	14.041	2.36979	5.53037	6.01517	4.00383	3.01717	2.45946	3.89905	2.12128	2.7044	2.29234
ENSAMEG00000000611	GL194506.1	+	149126	153492	381	443	325	531	500	664	401	359	585	289	625	545	398	628	616	1053	693	410	806	510	772	502	700	685	605	795	68.2028	55.5979	84.5107	78.3244	98.378	56.4426	46.6314	82.5751	47.6285	76.7147	104.395	77.6778	121.329	107.071	158.926	112.168	81.8365	153.827	91.6711
ENSAMEG00000000612	GL192794.1	+	752630	753523	306	957	605	730	727	696	1000	1170	828	809	1228	941	842	1029	1113	1466	1158	875	1262	1079	1111	1129	1519	1172	1002	1482	183.448	128.865	144.658	141.796	128.393	175.253	189.223	145.522	166.005	187.672	224.427	204.611	247.528	240.873	275.489	233.372	217.458	299.889	241.484
ENSAMEG00000000613	GL193564.1	+	11619	81696	429	3717	2515	3298	2307	4572	819	1236	2952	660	1962	414	299	646	466	805	849	405	930	587	1017	1116	1362	1295	1841	1825	508.228	382.103	466.161	320.954	601.595	102.38	142.584	370.064	96.6009	213.878	70.4288	51.8266	110.842	71.9354	107.902	122.043	71.7936	157.633	93.7062
ENSAMEG00000000614	GL193595.1	+	435312	436423	333	0	0	0	4	0	0	2	1	0	0	4	9	2	16	5	0	1	0	2	3	210	263	135	18	253	0	0	0	0.716915	0	0	0.297231	0.161501	0	0	0.876643	2.00973	0.442095	3.18193	0.863411	0	0.228373	0	0.411314
ENSAMEG00000000615	GL192438.1	+	2689757	2793664	6621	1064	500	911	1735	1120	902	1005	57	1037	950	3536	1924	2223	2186	4216	11575	4803	7083	6020	11961	1263	353	1532	1252	1012	9.90817	5.17367	8.76979	16.4392	10.0369	7.67932	7.89593	0.486655	10.3372	7.05303	40.9683	22.7129	25.9775	22.9823	38.4876	113.321	57.9868	81.7651	65.4504
ENSAMEG00000000616	GL193595.1	-	96306	442184	324	0	0	0	0	0	3	4	4	2	4	0	2	0	1	0	0	0	0	0	0	484	589	203	43	482	0	0	0	0	0	0.421159	0.518209	0.563138	0.328746	0.489689	0	0.389319	0	0.173361	0	0	0	0	0
ENSAMEG00000000617	GL193564.1	-	221687	493690	570	23	41	48	78	39	45	67	49	74	77	107	79	82	165	211	110	211	190	248	227	122	93	241	142	207	2.36688	4.68823	5.10633	8.16718	3.86229	4.23375	5.81713	4.62317	8.15176	6.31742	13.6999	10.306	10.5893	19.1701	21.2863	11.9009	28.1511	24.2382	29.7964
ENSAMEG00000000618	GL193433.1	+	273392	317898	4806	1500	1445	2126	1888	1733	447	1113	133	1168	828	3731	2903	4126	4204	5788	3059	3664	4529	4121	4326	1601	1343	3188	2356	2321	18.3076	19.5968	26.8239	23.4461	20.3549	4.98783	11.4609	1.48829	15.26	8.05694	56.6563	44.9161	63.194	57.9286	69.2527	39.2515	57.9775	68.5237	58.7227
ENSAMEG00000000619	GL193035.1	-	13485	20395	591	4447	3161	6025	4374	5802	2422	2807	6390	2449	4333	1125	767	2001	1252	2162	1494	660	1704	870	2001	2460	3640	3732	3986	4099	494.034	390.203	691.935	494.421	620.296	245.996	263.098	650.857	291.239	383.777	155.498	108.019	278.961	157.031	235.458	174.493	95.0601	234.67	112.843
ENSAMEG00000000620	GL192794.1	+	755169	759745	741	258	131	178	175	154	166	131	188	110	96	669	738	689	571	516	372	521	528	748	290	416	634	243	337	322	20.4233	11.5227	14.5661	14.0952	11.7316	12.0137	8.74907	13.6445	9.32114	6.05866	65.8893	74.0589	68.4434	51.0308	40.0427	30.9589	53.4697	51.8129	69.1307
ENSAMEG00000000621	GL194141.1	-	121521	122267	573	0	0	0	0	0	0	0	0	0	0	0	0	0	0	0	0	0	0	0	0	0	0	0	0	0	0	0	0	0	0	0	0	0	0	0	0	0	0	0	0	0	0	0	0
ENSAMEG00000000622	GL192667.1	+	507741	536888	4125	275	275	294	423	275	212	293	36	327	161	935	866	980	1042	1160	662	872	821	953	754	428	286	562	443	404	3.9105	4.34519	4.32181	6.12024	3.76326	2.75613	3.51522	0.46935	4.97758	1.82526	16.5423	15.6111	17.4877	16.7285	16.1706	9.8968	16.0761	14.4724	15.8218
ENSAMEG00000000623	GL192524.1	-	1147092	1148429	1284	136	91	171	181	203	16	123	7	120	19	75	26	33	76	90	58	52	38	74	77	51	26	72	102	65	6.21295	4.6193	8.07557	8.41329	8.92454	0.668256	4.74077	0.293191	5.86828	0.69201	4.26288	1.50573	1.89182	3.91979	4.0306	2.78563	3.07983	2.15199	3.94688
ENSAMEG00000000624	GL192386.1	+	1268856	1280554	1647	3	0	0	0	1	25	10	15	1	31	35	19	14	20	31	47	19	27	15	55	38	19	72	4	33	0.106844	0	0	0	0.0342737	0.814018	0.30048	0.489797	0.0381242	0.880221	1.55089	0.857825	0.625698	0.804175	1.08233	1.75981	0.8773	1.19204	0.623713
ENSAMEG00000000625	GL194506.1	-	162367	163201	354	205	40	100	58	122	225	126	414	69	339	299	134	245	210	385	254	155	344	166	326	220	131	245	59	260	33.9683	7.36473	17.1293	9.7786	19.4541	34.0853	17.6147	62.8949	12.2388	44.7837	61.6418	28.1475	50.944	39.2853	62.5387	44.2478	33.2979	70.6606	32.1138
ENSAMEG00000000626	GL193873.1	+	32709	36587	707	27	10	25	28	28	18	33	68	22	21	136	558	554	1274	226	278	248	1259	191	356	19	47	37	29	18	2.2401	0.921894	2.14419	2.36369	2.2356	1.36534	2.30995	5.17259	1.95388	1.38907	14.0387	58.6886	57.6794	119.334	18.3815	24.2486	26.676	129.488	18.5013
ENSAMEG00000000627	GL192524.1	-	1183842	1330770	3393	0	0	0	0	0	2	0	0	0	0	1	3	1	3	1	2	1	4	5	5	5	0	14	3	6	0	0	0	0	0	0.0532548	0	0	0	0	0.0362366	0.110765	0.0365486	0.0986452	0.0285517	0.0612395	0.0377597	0.144418	0.170019
ENSAMEG00000000629	GL193873.1	-	37119	230417	1578	130	70	93	67	83	109	88	13	61	44	345	313	287	233	272	278	158	247	180	195	146	113	133	71	105	4.83237	2.89129	3.5737	2.53408	2.96911	3.70431	2.75984	0.443052	2.42727	1.30398	15.9558	14.7495	13.3877	9.7783	9.91182	10.8642	7.61444	11.3818	7.81183
ENSAMEG00000000630	GL193649.1	-	384843	392088	543	271	70	286	43	217	213	126	154	68	403	175	86	136	118	252	119	61	236	65	122	154	48	114	48	235	29.2747	8.4023	31.938	4.72629	22.5587	21.0362	11.4836	15.2524	7.86327	34.7079	23.5204	11.7771	18.4361	14.3912	26.6865	13.5147	8.54315	31.6034	8.19787
ENSAMEG00000000631	GL193437.1	+	384755	393416	1140	35	73	103	164	76	188458	190263	651212	133568	147232	0	13	79	33	2	2	27	233	41	61	49456	71504	40813	10048	61475	1.80089	4.17367	5.47866	8.586	3.76326	8865.38	8259.58	30721	7356.85	6039.78	0	0.847964	5.10097	1.91701	0.100883	0.10819	1.80114	14.8619	2.46301
ENSAMEG00000000632	GL192386.1	+	1287863	1301136	1542	415	397	263	279	248	248	288	17	161	89	841	2013	828	1214	702	782	665	376	722	368	711	654	536	169	406	15.7866	16.7806	10.3422	10.7987	9.07867	8.62492	9.24308	0.592902	6.55595	2.69916	39.8033	97.073	39.5254	52.1373	26.1785	31.274	32.7963	17.7307	32.0657
ENSAMEG00000000633	GL193035.1	-	47921	61822	2076	1662	1825	1389	1700	811	311	1183	930	677	189	2231	3214	2528	2671	1990	7026	6201	4464	6013	5177	1479	2419	2238	2355	932	46.9599	57.2975	40.5711	48.8735	22.052	8.0338	28.2011	24.0921	20.4765	4.25753	78.4295	115.122	89.6355	85.2042	55.121	208.709	227.155	156.358	198.359
ENSAMEG00000000634	GL192524.1	+	1396571	1412157	2667	242	193	256	221	190	858	707	45	408	1039	493	546	410	853	619	628	1369	881	1371	1023	775	1133	1101	533	1003	5.3225	4.71666	5.82048	4.94563	4.02148	17.2525	13.1191	0.907419	9.60576	18.2186	13.4906	15.2233	11.316	21.1807	13.3463	14.521	39.0363	24.0201	35.2048
ENSAMEG00000000635	GL193091.1	+	326257	366320	1989	0	0	0	0	0	0	0	0	0	0	3	0	0	0	0	0	7	1	1	0	22	165	0	0	15	0	0	0	0	0	0	0	0	0	0	0.110076	0	0	0	0	0	0.26764	0.0365584	0.0344312
ENSAMEG00000000636	GL193649.1	+	474809	475388	252	19	28	19	10	21	4	2	2	3	12	4	2	2	4	7	1	2	2	3	1	5	1	3	13	2	4.42259	7.24199	4.57188	2.36838	4.70407	0.851231	0.39277	0.426823	0.747507	2.22692	1.15842	0.590158	0.584198	1.05117	1.59731	0.244715	0.603556	0.577101	0.815283
ENSAMEG00000000637	GL193838.1	-	144743	157526	699	54	92	75	517	66	674	1271	957	1133	1295	484	1549	1411	2562	829	697	1213	1405	1443	934	242	822	917	2232	454	4.53148	8.57849	6.50618	44.1434	5.32993	51.7095	89.9864	73.6297	101.776	86.6396	50.533	164.783	148.587	242.726	68.1976	61.4917	131.969	146.158	141.376
ENSAMEG00000000638	GL192905.1	+	105113	110904	1023	271	84	101	94	143	384	563	106	338	260	711	702	434	402	488	564	325	385	306	343	614	844	422	394	422	15.5388	5.35185	5.98671	5.48409	7.8907	20.13	27.2359	5.57248	20.7461	11.8856	50.7225	51.027	31.228	26.0234	27.4306	33.9989	24.1599	27.3657	20.4849
ENSAMEG00000000639	GL194141.1	+	184367	184996	612	0	0	0	0	0	0	0	0	0	0	0	0	0	0	0	0	0	0	0	0	0	0	0	0	0	0	0	0	0	0	0	0	0	0	0	0	0	0	0	0	0	0	0	0
ENSAMEG00000000640	GL192794.1	-	760673	762344	549	12097	6953	3645	4185	2810	187	115	142	69	108	541	293	215	188	425	374	177	137	151	201	419	499	117	1204	136	1292.5	825.468	402.594	454.962	288.928	18.2666	10.3665	13.9102	7.89171	9.19973	71.9171	39.6857	28.8268	22.6777	44.5152	42.0107	24.5182	18.1456	18.8361
ENSAMEG00000000641	GL195512.1	+	5288	13083	933	0	0	0	0	0	0	0	0	0	0	0	0	0	0	0	0	0	0	0	0	0	0	0	0	0	0	0	0	0	0	0	0	0	0	0	0	0	0	0	0	0	0	0	0
ENSAMEG00000000642	GL193838.1	-	184670	283533	5178	2	1	2	6	7	20	13	5	15	43	385	267	407	297	500	280	214	367	64	388	13	6	55	20	11	0.0226564	0.0125875	0.0234213	0.0691578	0.0763117	0.207136	0.124248	0.051931	0.181896	0.388356	5.42632	3.83432	5.78579	3.79847	5.55264	3.3347	3.14297	5.15378	0.846458
ENSAMEG00000000643	GL192794.1	+	765066	771764	1623	55	15	72	26	36	30	8	26	9	15	206	110	214	81	179	118	28	126	47	88	203	177	166	82	300	1.98778	0.602383	2.69002	0.956108	1.2521	0.991267	0.243938	0.861535	0.348192	0.432212	9.26309	5.0398	9.70567	3.30507	6.342	4.48357	1.31198	5.64513	1.9832
ENSAMEG00000000644	GL192821.1	+	123462	133753	648	270	140	259	208	260	1341	1210	161	854	1414	595	384	486	479	843	642	335	470	345	680	732	428	867	304	865	24.4406	14.0816	24.2363	19.1576	22.6492	110.979	92.41	13.3619	82.7518	102.046	67.0114	44.0651	55.2067	48.9525	74.8073	61.0971	39.315	52.7406	36.4613
ENSAMEG00000000645	GL192667.1	-	539892	542171	795	2130	1275	1835	1626	2125	1777	2794	1894	1899	2558	2908	2390	2936	2898	4106	2965	2677	3386	3002	3378	2446	3628	3127	2167	3286	157.158	104.531	139.962	122.069	150.885	119.869	173.927	128.124	149.987	150.472	266.953	223.547	271.844	241.405	296.991	229.995	256.076	309.701	258.601
ENSAMEG00000000646	GL192794.1	+	775777	788120	3849	79	47	79	47	35	21	48	5	39	17	122	98	130	90	97	191	79	161	69	129	130	169	133	68	81	1.20393	0.795885	1.24458	0.728789	0.513305	0.29259	0.617166	0.0698619	0.636226	0.20655	2.31323	1.89329	2.48614	1.54849	1.44916	3.06018	1.56087	3.04159	1.22769
ENSAMEG00000000647	GL193437.1	-	409777	420548	1878	93	475	216	564	113	119	119	201	105	245	223	232	338	401	427	130	226	317	223	190	108	69	224	62	178	2.90476	16.4854	6.9743	17.924	3.39655	3.39812	3.13588	5.75597	3.51065	6.1009	8.66595	9.1861	13.248	14.1404	13.0745	4.26883	9.15168	12.274	8.13199
ENSAMEG00000000648	GL192821.1	+	198026	338207	2535	135	220	152	254	104	149	490	43	397	152	702	1440	648	2084	880	521	1059	801	973	552	263	332	288	349	277	3.12377	5.65646	3.63587	5.98009	2.31585	3.15207	9.56592	0.912239	9.83347	2.80407	20.21	42.24	18.816	54.442	19.9616	12.6742	31.7692	22.9761	26.2859
ENSAMEG00000000649	GL193873.1	+	73030	124990	1527	112	70	56	64	47	29	14	4	7	21	84	59	25	47	65	225	338	197	477	111	58	30	46	62	20	4.30232	2.98785	2.22378	2.50146	1.73746	1.01847	0.45373	0.140877	0.287841	0.643138	4.01465	2.87311	1.20512	2.03832	2.44774	9.08666	16.8332	9.381	21.3928
ENSAMEG00000000650	GL193437.1	+	421117	424203	480	421	464	487	548	467	605	596	2151	400	1319	256	190	354	219	471	295	164	458	162	420	461	471	664	313	700	51.4475	63.0053	61.5219	68.1383	54.92	67.593	61.4488	241	52.3255	128.507	38.923	29.4341	54.2866	30.2146	56.425	37.9002	25.9831	69.3819	23.1133
ENSAMEG00000000651	GL192373.1	-	922970	2275155	2961	7	9	8	47	40	22	12	1	4	22	1617	523	917	717	2643	124	41	108	35	119	52	10	123	48	35	0.13867	0.198109	0.16383	0.947352	0.762564	0.398448	0.200563	0.0181627	0.0848235	0.347462	39.8546	13.1342	22.7961	16.036	51.3275	2.58252	1.05301	2.65221	0.8095
ENSAMEG00000000653	GL193437.1	+	435704	441912	1263	2	2	1	2	2	2	9	11	6	13	6	3	8	2	3	1	6	9	7	6	4	8	20	5	6	0.092886	0.103211	0.0480108	0.0945102	0.0893885	0.0849209	0.352653	0.46839	0.298292	0.481353	0.346701	0.176627	0.466248	0.104868	0.136587	0.0488267	0.361273	0.518157	0.379562
ENSAMEG00000000654	GL192905.1	+	114126	114802	297	3	1	0	0	0	1	11	0	8	4	3	17	16	7	4	2	3	3	2	2	6	10	1	2	5	0.5925	0.219454	0	0	0	0.180564	1.83293	0	1.69133	0.629836	0.737177	4.25629	3.96546	1.56083	0.774453	0.415274	0.768162	0.734492	0.46117
ENSAMEG00000000655	GL193373.1	+	225602	234902	2265	62	40	27	29	37	184	47	6	40	117	333	379	315	305	287	238	114	133	136	130	733	408	376	83	676	1.60564	1.15104	0.722833	0.764156	0.922122	4.3565	1.02692	0.142463	1.10888	2.41569	10.7296	12.4426	10.237	8.91756	7.28627	6.47992	3.82758	4.26978	4.11205
ENSAMEG00000000656	GL193437.1	+	452222	458720	1338	0	0	0	1	0	2225	3232	1531	2303	2407	0	0	0	2	0	105	6	3	14	106	3	3	1	4	4	0	0	0	0.0446063	0	89.1788	119.543	61.5372	108.077	84.1286	0	0	0	0.0989893	0	4.83943	0.341023	0.163037	0.716571
ENSAMEG00000000657	GL192905.1	-	115618	134115	2118	830	574	288	403	190	866	2343	262	1119	278	2065	4969	1147	1955	1230	1515	604	612	491	572	2120	3052	1080	603	899	22.9867	17.6639	8.24534	11.3562	5.06387	21.927	54.7463	6.65263	33.1741	6.13822	71.1543	174.454	39.8628	61.1273	33.3942	44.1111	21.687	21.011	15.8761
ENSAMEG00000000658	GL192821.1	+	432685	450538	1470	66	48	93	64	74	37	29	31	26	74	95	119	230	184	191	228	303	555	304	342	85	130	188	203	122	2.6336	2.12826	3.83626	2.59845	2.84164	1.34981	0.976314	1.13413	1.11058	2.35417	4.71643	6.01961	11.517	8.28924	7.4715	9.56485	15.6752	27.4535	14.1626
ENSAMEG00000000659	GL192667.1	+	580787	585759	1524	192	96	102	117	214	812	663	294	746	725	637	819	1367	1059	828	1836	775	2080	650	2038	2683	3565	2799	918	3312	7.38992	4.10569	4.05842	4.58198	7.92654	28.5732	21.5297	10.3748	30.7361	22.2473	30.5043	39.9611	66.0258	46.0177	31.2419	74.2931	38.6727	99.2431	29.2089
ENSAMEG00000000661	GL193035.1	+	277824	284051	603	0	0	0	0	0	0	0	0	0	0	0	0	0	0	0	0	0	0	0	0	0	0	0	0	0	0	0	0	0	0	0	0	0	0	0	0	0	0	0	0	0	0	0	0
ENSAMEG00000000662	GL193873.1	+	136028	226527	1506	1684	827	674	572	499	556	227	36	117	175	734	946	481	439	506	813	419	383	449	333	698	625	310	259	270	77.1713	42.111	31.9295	26.6709	22.0062	23.2945	8.77656	1.51255	5.73945	6.39369	41.8498	54.9566	27.6608	22.7127	22.7317	39.1689	24.8939	21.7576	24.0228
ENSAMEG00000000663	GL193997.1	+	16355	260581	3401	240	165	247	196	206	285	243	73	231	294	735	627	586	801	842	637	703	750	754	811	546	175	722	473	603	4.13931	3.16211	4.40385	3.43955	3.41913	4.49393	3.53597	1.15434	4.26481	4.04263	15.772	13.7088	12.683	15.597	14.2363	11.5503	15.7194	16.0353	15.1828
ENSAMEG00000000664	GL192374.1	-	3326108	3396193	750	1405	1041	1218	1521	1616	3076	1776	1147	1772	3685	527	493	629	717	886	733	659	729	821	862	639	768	945	457	855	109.885	90.4669	98.4755	121.038	121.628	219.944	117.19	82.2471	148.353	229.773	51.281	48.8793	61.7333	63.31	67.9304	60.2703	66.8209	70.6787	74.9669
ENSAMEG00000000665	GL193035.1	+	293337	294819	705	0	0	0	0	0	0	0	0	0	0	0	0	0	0	0	0	0	0	0	0	0	0	0	4	0	0	0	0	0	0	0	0	0	0	0	0	0	0	0	0	0	0	0	0
ENSAMEG00000000666	GL192821.1	+	453854	502662	1134	157	49	130	40	92	182	93	34	66	190	267	134	178	169	331	266	117	220	103	248	187	74	256	71	229	8.12101	2.81633	6.9514	2.10523	4.57962	8.60689	4.05862	1.61244	3.65448	7.83545	17.1832	8.7868	11.5541	9.86934	16.7844	14.4654	7.84623	14.1069	6.2203
ENSAMEG00000000667	GL192810.1	+	920558	944819	5835	31	9	7	1	1	2	0	0	0	8	7	0	11	1	5	75	1	6	1	92	1	2	0	0	1	0.311634	0.100531	0.0727444	0.0102285	0.00967418	0.0183813	0	0	0	0.0641169	0.0875516	0	0.138766	0.0113494	0.0492743	0.79265	0.0130331	0.0747709	0.0117367
ENSAMEG00000000668	GL193035.1	+	311252	313250	915	0	0	0	0	0	0	0	0	0	0	0	0	1	0	0	0	0	0	0	0	10	8	7	7	8	0	0	0	0	0	0	0	0	0	0	0	0	0.0804469	0	0	0	0	0	0
ENSAMEG00000000669	GL192819.1	+	634279	643966	1815	290	80	102	109	190	256	227	19	196	178	499	379	317	297	477	540	223	301	229	372	346	318	246	223	243	9.37227	2.87285	3.40773	3.58428	5.90924	7.56399	6.18953	0.562983	6.78069	4.58635	20.0646	15.5275	12.8562	10.8366	15.1124	18.3475	9.34365	12.059	8.64065
ENSAMEG00000000670	GL192386.1	-	1306867	1308893	654	10730	7910	8332	10117	11267	17636	22799	23604	17191	26953	15074	13462	21488	15303	25411	14073	9558	18555	10446	12481	11745	22825	19498	31398	18291	962.378	788.313	772.527	923.264	972.491	1446.14	1725.23	1941	1650.51	1927.32	1682.12	1530.63	2418.51	1549.58	2234.27	1327	1111.42	2063.03	1093.85
ENSAMEG00000000671	GL193437.1	-	471673	584573	975	52	103	106	107	65	107	2927	309	2320	136	8	5	8	11	9	3	0	2	1	4	12	13	7	4	17	3.1284	6.88546	6.5924	6.54985	3.76326	5.88528	148.569	17.044	149.409	6.52316	0.598815	0.381333	0.60397	0.747141	0.530798	0.189748	0	0.149158	0.0702397
ENSAMEG00000000672	GL192388.1	-	1528544	1609457	1467	436	458	675	496	458	655	707	570	481	1073	769	550	809	780	1135	745	636	856	679	1006	757	663	1053	679	1071	17.4333	20.3486	27.9007	20.1792	17.6234	23.9441	23.8505	20.896	20.5878	34.2053	38.2563	27.8786	40.5928	35.211	44.4895	31.3175	32.9697	42.4293	31.6977
ENSAMEG00000000673	GL193035.1	+	323260	329915	1138	0	0	1	0	0	0	0	0	0	0	0	0	0	0	0	0	0	0	0	0	144	190	216	183	138	0	0	0.0532844	0	0	0	0	0	0	0	0	0	0	0	0	0	0	0	0
ENSAMEG00000000674	GL194090.1	+	21681	303911	1548	4	12	12	0	0	0	1	0	0	0	0	0	0	0	0	0	1	1	0	0	0	4	8	0	1	0.15157	0.505255	0.470059	0	0	0	0.0319696	0	0	0	0	0	0	0	0	0	0.0491267	0.0469733	0
ENSAMEG00000000675	GL192374.1	-	3428839	3483617	1761	605	417	528	664	535	1710	2044	382	1419	2411	1594	1542	1903	2032	2229	1635	2021	1891	2090	1979	962	928	1592	1469	1347	20.1521	15.4339	18.181	22.5041	17.1494	52.0744	57.4421	11.666	50.5961	64.0268	66.0596	65.1124	79.5444	76.415	72.7851	57.2558	87.276	78.0826	81.2783
ENSAMEG00000000676	GL192794.1	-	797488	818375	1488	0	0	0	1	1	2609	1674	353	1308	2303	2	0	1	1	1	0	1	3	0	2	2248	4138	2176	551	3055	0	0	0	0.0401097	0.037936	94.0284	55.6751	12.7582	55.1949	72.3793	0.0980921	0	0.0494683	0.0445053	0.0386446	0	0.0511076	0.146602	0
ENSAMEG00000000677	GL193873.1	-	157379	164429	1047	0	0	0	0	0	2406	1092	1209	602	1147	0	1	0	0	0	0	3	5	2	2	0	3	0	0	0	0	0	0	0	0	123.236	51.616	62.1009	36.1031	51.2319	0	0.0710219	0	0	0	0	0.217903	0.347253	0.130819
ENSAMEG00000000678	GL193035.1	+	338260	340758	696	0	0	0	0	0	0	1	1	0	0	0	0	0	1	0	0	0	0	0	0	135	229	170	114	125	0	0	0	0	0	0	0.0711049	0.0772697	0	0	0	0	0	0.0951492	0	0	0	0	0
ENSAMEG00000000679	GL192519.1	+	442220	470346	4017	3	0	4	0	0	5	3	4	6	6	87	38	190	60	125	46	17	70	20	93	3	2	14	1	4	0.043807	0	0.060381	0	0	0.0667507	0.0369597	0.0535521	0.0937872	0.0698511	1.58061	0.70343	3.48163	0.989154	1.78937	0.706182	0.321836	1.26712	0.34097
ENSAMEG00000000680	GL193873.1	+	168845	201372	3816	1057	973	776	960	657	1229	1088	78	775	564	1754	1799	1353	1344	1433	1649	1151	1118	1372	1151	1101	1126	917	864	710	16.2476	16.619	12.3309	15.0146	9.71878	17.2716	14.1101	1.09927	12.7523	6.91185	33.545	35.0559	26.0988	23.3241	21.5938	26.6485	22.938	21.3037	24.6226
ENSAMEG00000000681	GL194090.1	-	63646	64113	444	0	2	0	0	0	0	0	0	0	0	0	0	0	0	0	0	0	0	0	0	0	0	0	0	0	0	0.293594	0	0	0	0	0	0	0	0	0	0	0	0	0	0	0	0	0
ENSAMEG00000000682	GL194090.1	-	180873	181613	675	0	0	0	0	0	0	0	0	0	0	0	0	0	0	0	0	0	0	0	0	0	0	0	0	0	0	0	0	0	0	0	0	0	0	0	0	0	0	0	0	0	0	0	0
ENSAMEG00000000683	GL193035.1	+	347313	349422	729	0	0	0	0	1	0	1	0	0	0	0	0	0	0	0	0	0	0	0	0	81	74	106	101	50	0	0	0	0	0.0774332	0	0.0678861	0	0	0	0	0	0	0	0	0	0	0	0
ENSAMEG00000000684	GL192386.1	-	1310575	1321159	1473	5	2	4	3	1	15	27	5	17	5	42	38	47	54	27	22	13	19	10	16	25	16	18	11	16	0.199109	0.0884968	0.164664	0.121554	0.0383224	0.546105	0.90713	0.182552	0.72467	0.158742	2.08091	1.91831	2.34869	2.42776	1.05403	0.921045	0.671164	0.937935	0.464927
ENSAMEG00000000685	GL193091.1	+	370317	398412	1995	2	0	0	1	0	0	2	0	0	0	0	0	1	3	0	5	0	0	3	10	0	1	1	3	0	0.0588045	0	0	0.0299164	0	0	0.049613	0	0	0	0	0	0.0368967	0.0995847	0	0.154557	0	0	0.102983
ENSAMEG00000000686	GL193035.1	+	366198	367625	708	0	0	2	0	0	0	0	0	0	0	1	0	0	0	0	1	0	1	0	1	232	255	272	281	168	0	0	0.171293	0	0	0	0	0	0	0	0.10308	0	0	0	0	0.0871019	0	0.102704	0
ENSAMEG00000000687	GL192583.1	+	90994	94423	1140	92	16	15	30	104	359	118	0	70	178	2975	580	652	402	2497	938	117	151	144	510	242	48	196	21	106	4.73376	0.914777	0.797863	1.57061	5.14972	16.888	5.12255	0	3.85556	7.30195	190.454	37.8322	42.0991	23.3526	125.952	50.741	7.80493	9.63151	8.65058
ENSAMEG00000000688	GL192905.1	-	147507	171006	1782	582	2774	238	2178	268	474	2856	17	2064	188	2521	4958	1463	3353	2179	456	1828	318	1953	276	883	1874	380	1062	683	19.1575	101.461	8.09863	72.9461	8.4895	14.2646	79.3157	0.51305	72.7271	4.93371	103.246	206.889	60.432	124.606	70.3139	15.7804	78.0111	12.976	75.0554
ENSAMEG00000000689	GL192386.1	-	1343371	1356135	1326	713	537	311	469	289	172	277	38	207	87	761	813	643	755	809	598	628	363	730	453	567	537	369	759	329	31.5406	26.3956	14.2219	21.1097	12.303	6.95621	10.3382	1.5412	9.80215	3.06831	41.884	45.5917	35.6942	37.7066	35.083	27.8111	36.0167	19.9061	37.7022
ENSAMEG00000000690	GL192821.1	+	542246	586883	2190	14	3	12	10	7	1	8	0	16	4	41	32	35	53	54	70	97	59	88	77	18	14	28	6	18	0.37498	0.0892848	0.332261	0.272526	0.18043	0.0244875	0.180782	0	0.458744	0.0854161	1.3663	1.08654	1.1764	1.60268	1.41789	1.97113	3.36834	1.95898	2.75186
ENSAMEG00000000691	GL193035.1	+	370840	372316	699	0	0	0	0	0	0	0	0	0	0	2	1	1	0	0	0	0	0	0	0	19	11	31	22	21	0	0	0	0	0	0	0	0	0	0	0.208814	0.10638	0.105306	0	0	0	0	0	0
ENSAMEG00000000693	GL192794.1	-	821574	839300	3783	1	0	0	2	0	10	0	1	1	6	118	40	68	22	119	1	0	0	0	2	2406	754	851	43	2008	0.0155056	0	0	0.0315534	0	0.141759	0	0.0142162	0.0165981	0.0741718	2.27642	0.786253	1.32313	0.385124	1.80885	0.0163014	0	0	0
ENSAMEG00000000694	GL192583.1	+	101656	107384	984	0	1	2	0	0	0	0	0	1	1	8	3	8	2	6	18	12	13	24	11	2	3	0	1	0	0	0.0662377	0.123247	0	0	0	0	0	0.0638115	0.0475257	0.593338	0.226707	0.598446	0.134601	0.350629	1.12808	0.927415	0.960661	1.67034
ENSAMEG00000000695	GL192667.1	+	597189	600954	1860	99	45	51	70	80	161	174	61	143	99	796	534	555	568	843	780	417	505	366	689	199	122	308	174	164	3.12209	1.57688	1.66264	2.24614	2.42791	4.64195	4.62962	1.76374	4.82745	2.48912	31.2325	21.3485	21.9639	20.2232	26.0619	25.8608	17.0495	19.7424	13.4758
ENSAMEG00000000696	GL192374.1	+	1065651	3727416	801	62	10	30	5	38	104	19	18	13	78	121	66	106	49	170	157	44	78	20	113	82	13	74	20	54	3.30315	0.591988	1.65225	0.271041	1.94828	5.06563	0.854034	0.879232	0.741396	3.31307	8.02057	4.45754	7.08678	2.94729	8.87878	8.79373	3.03916	5.15145	1.24403
ENSAMEG00000000697	GL193035.1	+	390736	392000	795	2	0	1	5	1	0	1	0	1	1	2	2	5	1	0	11	5	6	0	5	83	60	132	55	83	0.147566	0	0.0762737	0.375366	0.0710048	0	0.0622503	0	0.0789818	0.0588243	0.183599	0.187069	0.462949	0.0833004	0	0.85327	0.47829	0.54879	0
ENSAMEG00000000698	GL192388.1	+	1611331	1697219	1209	448	212	479	401	484	633	594	1607	628	1139	1117	1210	1503	2547	2068	966	1528	1749	1633	1550	556	565	1037	974	927	21.7358	11.429	24.0243	19.7957	22.5982	28.0779	24.3147	71.4838	32.6158	44.0576	67.427	74.4214	91.5088	139.514	98.3594	49.2733	96.1137	105.193	92.5012
ENSAMEG00000000700	GL193090.1	+	53012	59607	1179	0	0	1	0	0	0	0	0	0	0	0	0	0	0	0	0	0	0	0	0	2	0	0	0	0	0	0	0.0514314	0	0	0	0	0	0	0	0	0	0	0	0	0	0	0	0
ENSAMEG00000000701	GL192524.1	-	1428296	1523653	2402	230	317	321	324	210	444	602	99	431	650	639	734	574	1031	856	1012	983	1020	981	1136	445	278	659	533	587	5.61666	8.60174	8.10353	8.05052	4.93516	9.91283	12.4032	2.21657	11.2667	12.6551	19.4149	22.7228	17.5901	28.425	20.4924	25.9817	31.1221	30.878	27.9694
ENSAMEG00000000702	GL193997.1	+	321135	371865	1542	0	0	0	0	0	0	0	0	0	0	6	1	1	1	0	1	0	0	1	0	0	0	0	0	0	0	0	0	0	0	0	0	0	0	0	0.283971	0.048223	0.047736	0.0429467	0	0.0399923	0	0	0.0444123
ENSAMEG00000000703	GL192402.1	+	12568	25942	636	17	29	4	127	37	630	307	162	237	684	471	801	577	902	801	98	77	144	108	120	184	45	628	92	197	1.56789	2.97195	0.381369	11.9179	3.28397	53.1216	23.8886	13.6986	23.3984	50.2947	54.0469	93.6514	66.7804	93.9212	72.4214	9.50232	9.20708	16.4637	11.6293
ENSAMEG00000000704	GL193373.1	+	237098	237960	477	0	0	0	0	0	0	0	0	0	0	0	1	1	1	0	0	0	0	0	0	0	2	0	0	4	0	0	0	0	0	0	0	0	0	0	0	0.155891	0.154316	0.138834	0	0	0	0	0
ENSAMEG00000000705	GL193035.1	-	508239	510111	819	115	11	100	34	94	171	56	49	35	95	273	158	197	163	217	347	113	177	98	254	217	171	268	109	168	8.2364	0.875405	7.40386	2.47769	6.47886	11.197	3.38386	3.21759	2.68336	5.42455	24.3268	14.3454	17.7057	13.1801	15.2359	26.128	10.4926	15.7149	8.19464
ENSAMEG00000000706	GL193373.1	+	246317	254826	1443	10775	11071	8215	10386	9295	4460	4364	1625	3041	3733	2811	3569	2379	2672	3255	2412	2326	2126	2405	2070	6306	8950	4859	4049	6024	438	500.058	345.21	429.57	363.612	165.751	149.667	60.5627	132.326	120.98	142.168	183.916	121.355	122.627	129.711	103.079	122.583	107.132	114.14
ENSAMEG00000000707	GL193035.1	-	555413	564970	573	425	284	262	484	384	456	553	583	338	575	1125	771	1015	1006	1519	723	491	646	497	803	682	616	908	519	849	43.5069	32.3046	27.7261	50.413	37.8296	42.6774	47.7616	54.7183	37.0388	46.9285	143.286	100.055	130.389	116.267	152.439	77.8116	65.1651	81.9785	59.4004
ENSAMEG00000000708	GL192667.1	+	618232	636598	2475	461	122	270	180	315	347	182	30	154	272	842	617	802	647	1035	725	588	731	665	754	1051	825	1015	520	1061	10.9257	3.21281	6.61501	4.3406	7.1844	7.51869	3.63919	0.651875	3.90697	5.13946	24.8281	18.5374	23.8523	17.3118	24.0468	18.0644	18.0672	21.4765	18.4007
ENSAMEG00000000709	GL193534.1	+	89197	102693	663	75	136	121	317	492	51	65	199	49	60	0	1	0	2	0	42	39	105	5	32	16	18	49	1	11	6.63547	13.3698	11.0666	28.5363	41.8896	4.1252	4.85186	16.142	4.64063	4.23215	0	0.112157	0	0.19977	0	3.90658	4.47342	11.5159	0.516469
ENSAMEG00000000710	GL193534.1	+	199808	208427	318	415	878	414	463	228	1	3	0	1	0	49	78	18	52	11	20	38	15	32	4	15	10	4	9	3	76.5499	179.957	78.9433	86.8972	40.4727	0.16864	0.466877	0	0.197455	0	11.2454	18.2392	4.16654	10.8291	1.9891	3.8785	9.0875	3.42994	6.89145
ENSAMEG00000000711	GL193534.1	+	300294	413396	1425	1218	1106	1440	1277	1075	2	2	0	2	9	85	47	24	53	119	77	40	59	24	66	18	21	13	43	26	50.1367	50.5872	61.2759	53.4845	42.5842	0.0752667	0.0694582	0	0.0881271	0.29536	4.35322	2.45257	1.23973	2.46306	4.80202	3.33224	2.13468	3.01064	1.15341
ENSAMEG00000000712	GL192583.1	+	244395	291588	3750	3905	3015	990	2110	1297	59	46	8	34	53	1685	532	188	463	1395	2658	1227	738	1483	1814	391	126	288	760	223	61.082	52.403	16.0083	33.5817	19.5238	0.84374	0.607065	0.11473	0.569301	0.660949	32.7926	10.5492	3.69026	8.17644	21.3912	43.7104	24.8829	14.3102	27.083
ENSAMEG00000000713	GL192819.1	+	645262	652185	1953	131	39	50	47	53	461	223	67	141	239	1068	678	531	375	613	1040	315	437	332	524	1076	672	634	329	450	3.93453	1.30156	1.55242	1.43631	1.53189	12.6586	5.65082	1.84498	4.53327	5.72294	39.9095	25.8147	20.0135	12.7158	18.0489	32.8392	12.2658	16.2705	11.6419
ENSAMEG00000000714	GL193090.1	+	63113	73227	1236	494	169	457	345	457	510	400	871	433	571	449	366	629	533	698	471	315	600	431	651	522	611	636	385	720	23.444	8.91186	22.4202	16.6591	20.8715	22.1279	16.0159	37.8982	21.997	21.6044	26.5115	22.0192	37.4595	28.5577	32.4735	23.4998	19.3812	35.2984	23.8807
ENSAMEG00000000715	GL192519.1	+	545907	578981	684	1403	807	1299	1094	1693	1762	2794	2774	1977	2600	1209	1096	1205	1540	2032	1302	733	1282	1007	1407	1107	1291	1206	1024	1520	120.317	76.8985	115.158	95.4582	139.719	138.146	202.152	218.107	181.487	177.763	128.996	119.15	129.676	149.1	170.828	117.386	81.4959	136.287	100.823
ENSAMEG00000000716	GL193838.1	-	325714	437249	4386	25	10	10	22	25	53	40	6	52	72	364	196	550	252	595	64	40	85	44	94	71	8	229	38	50	0.337889	0.150179	0.139718	0.302542	0.325166	0.654899	0.45612	0.0743498	0.752329	0.77583	6.12095	3.35819	9.32832	3.84525	7.8835	0.909392	0.700904	1.42414	0.694305
ENSAMEG00000000717	GL193035.1	+	583892	587514	1119	7477	8445	6458	12601	6729	7019	13669	12844	10849	8571	17336	14381	20243	19888	25365	14071	15655	15097	15853	16168	10294	13599	15538	28796	13540	391.941	491.892	349.953	672.089	339.45	336.382	604.526	617.289	608.771	358.2	1130.64	955.648	1331.6	1177	1303.46	775.453	1063.93	981.031	970.217
ENSAMEG00000000718	GL192519.1	-	586921	602649	882	0	0	0	0	0	0	0	0	0	0	0	0	0	0	0	0	0	0	0	0	0	5	0	1	1	0	0	0	0	0	0	0	0	0	0	0	0	0	0	0	0	0	0	0
ENSAMEG00000000719	GL192386.1	-	1433285	1452610	1896	44	25	16	21	16	45	35	11	13	15	1284	729	640	473	1023	480	244	400	245	358	103	89	54	51	51	1.36125	0.859413	0.51171	0.661048	0.476361	1.27281	0.913563	0.312013	0.430526	0.369979	49.4235	28.5909	24.8469	16.521	31.0262	15.6122	9.78678	15.3407	8.84943
ENSAMEG00000000720	GL193534.1	+	440518	446086	675	127	123	99	142	67	133	113	41	76	126	206	212	191	283	232	264	432	273	366	286	189	128	219	198	171	11.0363	11.8769	8.89352	12.5556	5.60307	10.5666	8.28482	3.26662	7.06975	8.72952	22.2726	23.3545	20.8286	27.765	19.764	24.1191	48.6708	29.409	37.1334
ENSAMEG00000000721	GL193534.1	-	452956	523829	5102	568	497	569	797	434	433	659	39	607	341	1205	1358	1156	1811	1493	974	1490	883	1473	1037	595	559	789	943	582	6.53028	6.34916	6.7626	9.32331	4.8018	4.5513	6.39225	0.411095	7.47038	3.12563	17.2367	19.7924	16.6781	23.5067	16.8272	11.7728	22.2093	12.5847	19.772
ENSAMEG00000000722	GL192388.1	-	1976858	2231084	996	35	26	25	15	32	105	82	90	45	138	96	106	90	113	131	113	53	114	86	156	90	89	98	47	98	3.15363	2.60311	2.32863	1.37519	2.77475	8.6496	6.23364	7.43498	4.34036	9.91338	10.7621	12.1078	10.1763	11.4951	11.5713	10.7043	6.19132	12.7334	9.04701
ENSAMEG00000000723	GL193678.1	-	366115	537213	708	29	29	39	72	48	1	8	0	10	10	18	25	25	31	32	59	47	52	77	89	106	43	101	64	203	2.40264	2.66972	3.34021	6.06948	3.82704	0.0757451	0.559198	0	0.886872	0.660527	1.85544	2.6257	2.59918	2.89963	2.59901	5.13901	5.04839	5.34063	7.44809
ENSAMEG00000000724	GL192519.1	-	610557	617743	2190	80	37	49	13	24	339	224	32	100	88	674	219	148	106	399	303	184	99	108	163	192	114	139	60	78	2.14274	1.10118	1.35673	0.354284	0.618617	8.30125	5.06189	0.785822	2.86715	1.87915	22.4607	7.43599	4.97448	3.20535	10.4766	8.53217	6.38943	3.2871	3.37728
ENSAMEG00000000725	GL192667.1	-	638137	642982	3711	587	234	281	205	179	362	384	38	205	110	1529	1532	1026	928	959	1828	1202	782	1254	818	1031	926	705	377	460	9.27835	4.10984	4.59153	3.29697	2.72281	5.23125	5.12093	0.550695	3.46862	1.3862	30.0693	30.6978	20.351	16.5604	14.86	30.3771	24.6321	15.3228	23.1416
ENSAMEG00000000726	GL192402.1	+	268289	299763	1680	94	99	178	152	160	215	225	5	267	275	2167	1522	2352	1888	3075	1091	524	683	619	1257	1187	1259	1477	385	1417	3.28203	3.84084	6.4247	5.39991	5.37608	6.86305	6.62799	0.160059	9.97921	7.65503	94.1362	67.3666	103.052	74.423	105.251	40.0476	23.7198	29.562	25.233
ENSAMEG00000000727	GL193091.1	+	431633	454132	1914	21	13	15	20	20	17	51	61	13	15	172	1017	340	1320	202	399	478	955	357	321	18	58	12	31	21	0.643578	0.442692	0.475216	0.623649	0.589852	0.476316	1.31867	1.71398	0.426477	0.366499	6.55833	39.511	13.0758	45.6716	6.06878	12.8556	18.9921	36.2814	12.7736
ENSAMEG00000000728	GL193678.1	+	532205	532581	261	0	4	0	4	0	0	0	0	0	1	0	1	0	0	0	0	1	4	0	0	0	1	0	0	0	0	0.998895	0	0.914685	0	0	0	0	0	0.179177	0	0.284904	0	0	0	0	0.291372	1.1144	0
ENSAMEG00000000729	GL192821.1	-	279240	1169032	2442	0	3	1	1	1	95	64	630	55	80	0	0	2	0	0	4	0	2	5	1	2	2	4	0	0	0	0.0706663	0.0219146	0.0215696	0.0204007	1.84121	1.14467	12.2447	1.2481	1.35209	0	0	0.0532048	0	0	0.089148	0	0.0525585	0.123751
ENSAMEG00000000730	GL192453.1	-	65511	84819	1857	41	35	35	177	56	143	130	11	91	153	211	413	521	869	290	1297	1864	1477	2224	1147	50	37	40	59	37	1.29508	1.22845	1.14287	5.68871	1.70228	4.12964	3.4645	0.318566	3.07697	3.85304	8.29235	16.5378	20.6517	30.99	8.98003	43.0714	76.3347	57.835	82.0182
ENSAMEG00000000731	GL192388.1	+	2245840	2261922	1107	2	1	1	0	2	1	0	1	1	2	4	2	5	3	1	6	4	15	4	16	0	2	4	0	1	0.105976	0.0588779	0.0547765	0	0.101985	0.048444	0	0.0485815	0.0567214	0.0844901	0.263706	0.134345	0.33247	0.179468	0.051945	0.334245	0.27479	0.985294	0.247457
ENSAMEG00000000732	GL192819.1	-	676678	677880	366	249	180	235	248	224	330	318	440	243	250	423	523	511	516	396	510	321	482	334	463	300	567	436	464	307	39.9063	32.0547	38.934	40.4411	34.5479	48.3527	42.9986	64.6532	41.6888	31.9435	84.3464	106.257	102.771	93.3647	62.2165	85.931	66.6979	95.7609	62.4961
ENSAMEG00000000733	GL192905.1	-	199174	226580	1248	23	8	15	15	13	178	201	9	167	100	153	58	110	82	193	246	46	105	98	263	51	35	96	21	67	1.08103	0.417807	0.728818	0.717346	0.588009	7.6488	7.97058	0.387834	8.40226	3.74722	8.94713	3.45583	6.48796	4.35125	8.89272	12.1557	2.80305	6.11782	5.37773
ENSAMEG00000000734	GL192667.1	+	684097	685944	621	0	4	1	1	0	1	1	0	2	0	1	2	5	2	5	1	1	4	0	0	0	0	1	2	0	0	0.419825	0.0976451	0.0961082	0	0.0863567	0.0796924	0	0.202224	0	0.117521	0.239484	0.592664	0.213281	0.462988	0.0993046	0.122461	0.468372	0
ENSAMEG00000000735	GL193090.1	-	76972	114213	1605	432	249	229	257	300	86	67	9	57	58	250	153	149	147	236	735	238	303	275	608	809	515	796	194	713	15.7882	10.1117	8.65172	9.55675	10.5512	2.8735	2.0659	0.301568	2.22995	1.68996	11.3677	7.08852	6.83347	6.06536	8.45529	28.2405	11.2769	13.7274	11.734
ENSAMEG00000000736	GL192388.1	+	2297144	2311395	1227	0	0	0	0	0	0	0	0	0	0	3	0	0	0	0	0	2	0	0	0	0	0	0	0	0	0	0	0	0	0	0	0	0	0	0	0.178437	0	0	0	0	0	0.123958	0	0
ENSAMEG00000000737	GL192519.1	+	621659	707621	3162	473	382	494	429	396	676	706	12	682	484	1755	1572	1463	1608	1853	1567	1988	1715	1863	2081	1040	697	1426	497	1000	8.77451	7.87411	9.47343	8.09744	7.06949	11.465	11.0497	0.204098	13.5431	7.15825	40.5063	36.9683	34.0575	33.6774	33.6981	30.561	47.8126	39.4389	40.3495
ENSAMEG00000000738	GL192667.1	-	684155	693342	1134	638	520	588	887	698	482	766	874	599	617	606	579	995	1038	1161	827	591	810	694	1000	530	904	818	694	919	33.0013	29.8876	31.4417	46.6834	34.7454	22.7941	33.4291	41.4493	33.1671	25.4446	39.0002	37.9668	64.5863	60.6176	58.8723	44.9731	39.6335	51.9391	41.9116
ENSAMEG00000000739	GL192819.1	-	686530	689041	678	9	15	8	35	11	6	13	0	19	0	113	96	55	115	121	61	96	29	65	52	63	83	76	125	48	0.77864	1.44199	0.715488	3.08099	0.915836	0.47458	0.948904	0	1.75962	0	12.1634	10.5288	5.97122	11.2327	10.2624	5.54831	10.7679	3.11021	6.56555
ENSAMEG00000000740	GL193433.1	-	319587	451593	1221	41	23	50	85	68	77	174	36	177	101	64	167	68	222	133	160	157	104	161	236	154	180	313	148	209	1.96966	1.22776	2.48311	4.15485	3.14375	3.38192	7.05249	1.58564	9.10232	3.86838	3.82535	10.1704	4.09943	12.0407	6.26365	8.081	9.7785	6.19355	9.03021
ENSAMEG00000000742	GL192905.1	+	652451	692442	1281	5	17	3	2	1	0	0	0	0	0	2	1	0	0	0	33	6	13	13	24	1	1	2	0	0	0.228952	0.864968	0.142008	0.0931822	0.0440662	0	0	0	0	0	0.113943	0.0580483	0	0	0	1.58864	0.356197	0.737932	0.694995
ENSAMEG00000000743	GL192819.1	+	707247	712411	1185	71	22	31	35	28	82	72	6	42	56	276	255	267	249	307	165	159	135	187	176	151	143	77	103	88	3.5145	1.21005	1.5863	1.7628	1.33381	3.71094	3.00693	0.272302	2.22549	2.21001	16.998	16.0015	16.5853	13.9154	14.8974	8.5867	10.2039	8.28395	10.8071
ENSAMEG00000000744	GL192524.1	+	1546618	1591388	2616	31	29	42	61	41	37	69	15	66	88	102	81	73	159	137	114	136	141	167	147	50	25	81	72	66	0.6951	0.722538	0.97354	1.3917	0.88471	0.758493	1.30533	0.30837	1.58417	1.57314	2.84557	2.30243	2.05407	4.02507	3.01144	2.68737	3.95357	3.91925	4.37186
ENSAMEG00000000745	GL192905.1	-	710720	819210	1846	47	26	22	19	44	14	8	2	9	10	56	63	32	72	66	103	71	75	87	87	49	16	32	18	31	1.49345	0.917998	0.722659	0.614291	1.34548	0.406709	0.21447	0.0582662	0.30613	0.253333	2.21393	2.53774	1.27599	2.58294	2.05591	3.44086	2.92493	2.95428	3.22757
ENSAMEG00000000747	GL193035.1	-	592883	624759	1212	18	3	4	11	13	38	22	20	17	17	153	406	388	739	213	393	249	755	196	327	14	32	15	22	11	0.871151	0.161331	0.200124	0.541679	0.605474	1.68139	0.898315	0.887454	0.880726	0.655949	9.21289	24.9093	23.5646	40.3791	10.1058	19.9964	15.6237	45.2967	11.0749
ENSAMEG00000000748	GL193373.1	+	258621	288751	8841	31	6	15	12	17	10	4	0	5	5	454	387	301	267	404	94	89	57	60	73	104	41	203	29	46	0.205676	0.0442334	0.10288	0.0810088	0.108543	0.0606578	0.0223907	0	0.035511	0.026448	3.74767	3.25498	2.50608	1.99997	2.62768	0.655673	0.765556	0.468809	0.464769
ENSAMEG00000000749	GL193091.1	+	457132	477325	2082	2	0	0	1	2	2	18	2	7	6	122	154	221	125	114	35	24	38	31	43	1	2	2	1	0	0.0563473	0	0	0.0286663	0.0542256	0.0515154	0.427859	0.0516616	0.211111	0.13477	4.27648	5.50021	7.81343	3.97597	3.14859	1.03669	0.876635	1.32717	1.01969
ENSAMEG00000000750	GL192667.1	-	701267	737385	1792	340	536	387	728	263	155	195	28	177	121	876	951	849	1155	1064	524	1148	680	1200	690	373	314	534	608	357	11.8219	20.7086	13.9104	25.7554	8.80026	4.92725	5.72042	0.892609	6.58798	3.35424	37.8962	41.9184	37.0444	45.34	36.2676	19.1548	51.7505	29.31	48.714
ENSAMEG00000000751	GL192905.1	+	957388	960677	570	183	124	108	153	95	199	256	24	236	144	3429	2057	2027	1868	4298	449	368	395	482	351	319	337	304	246	252	18.8321	14.179	11.4892	16.0202	9.40814	18.7226	22.2266	2.26441	25.9975	11.8144	439.036	268.348	261.764	217.028	433.594	48.5772	49.0977	50.39	57.9108
ENSAMEG00000000752	GL192386.1	-	1455233	1469149	1755	371	176	177	167	233	290	201	46	123	186	816	636	534	504	753	531	351	432	405	501	435	333	376	290	342	12.4	6.53636	6.11559	5.67926	7.49435	8.86153	5.66797	1.40961	4.40071	4.95632	33.9328	26.9475	22.3972	19.0181	24.6723	18.6586	15.2096	17.899	15.8039
ENSAMEG00000000753	GL193035.1	+	627607	635170	564	502	336	323	393	362	438	745	353	540	557	970	564	808	797	1370	1195	480	751	571	1188	785	664	1095	605	946	52.2093	38.8294	34.7269	41.5878	36.2313	41.6469	65.3711	33.66	60.1186	46.1849	125.516	74.3599	105.454	93.5823	139.68	130.662	64.7218	96.824	69.3337
ENSAMEG00000000754	GL193090.1	+	115672	121159	225	3	3	3	4	8	0	0	0	0	0	1	0	0	0	0	79	80	426	8	161	30	6	43	0	60	0.7821	0.869038	0.808502	1.06103	2.00707	0	0	0	0	0	0.324358	0	0	0	0	21.6524	27.0393	137.673	2.43498
ENSAMEG00000000755	GL193090.1	+	163778	168683	204	9	9	5	10	8	16	2	3	2	13	67	16	268	31	106	110	86	87	138	106	7	2	19	21	10	2.58783	2.87549	1.48622	2.92565	2.21368	4.20608	0.485186	0.790878	0.615594	2.98014	23.9691	5.83215	96.7019	10.0634	29.8791	33.2524	32.0595	31.0107	46.3272
ENSAMEG00000000756	GL192453.1	-	122428	169997	789	205	110	285	171	278	173	122	252	108	287	197	75	309	163	344	161	70	205	68	235	245	206	496	325	434	15.2405	9.0869	21.9033	12.9351	19.8894	11.7586	7.65229	17.1768	8.59491	17.0109	18.222	7.06843	28.8278	13.6812	25.0711	12.5837	6.74698	18.8929	5.90227
ENSAMEG00000000757	GL193796.1	-	117189	139951	1638	44	16	22	11	24	8	23	2	10	8	225	226	136	144	153	791	64	69	90	306	10	11	2	6	3	1.57855	0.637826	0.815919	0.401538	0.828607	0.262398	0.696176	0.0657856	0.38404	0.228821	10.0432	10.2785	6.12282	5.83256	5.38103	29.8346	2.9768	3.06869	3.76975
ENSAMEG00000000758	GL192819.1	-	713412	716281	993	4222	2406	2175	2173	2217	4397	4216	3599	2207	2922	3880	3372	3293	2760	4079	4412	1702	2310	1650	2856	4520	5624	3304	2085	3614	249.398	157.923	132.817	130.606	126.029	237.463	210.116	194.918	139.556	137.611	285.161	252.509	244.103	184.066	236.209	273.998	130.346	169.155	113.795
ENSAMEG00000000759	GL193873.1	+	201772	218128	2172	7	11	0	10	2	2	1	0	2	0	4	3	0	0	2	5	5	3	4	5	2	3	0	2	1	0.189044	0.330091	0	0.274785	0.0519787	0.0493808	0.022785	0	0.0578182	0	0.134402	0.102707	0	0	0.0529495	0.141962	0.175065	0.100435	0.126121
ENSAMEG00000000760	GL192519.1	-	728400	797447	4762	326	96	232	152	286	324	176	97	176	376	727	506	649	662	1029	786	310	629	382	1027	433	141	598	298	538	4.01561	1.31396	2.95421	1.90505	3.39025	3.64874	1.82908	1.09547	2.32069	3.69251	11.1417	7.90133	10.032	9.20625	12.4256	10.1787	4.95063	9.60469	5.49366
ENSAMEG00000000761	GL193090.1	-	170344	174869	990	64	95	77	203	68	13	45	3	56	13	30	51	37	34	18	716	1264	771	1509	776	26	140	48	278	25	3.792	6.25444	4.71626	12.2381	3.87729	0.7042	2.2495	0.162969	3.55179	0.61409	2.21153	3.83066	2.75104	2.27435	1.04551	44.6004	97.0957	56.6293	104.386
ENSAMEG00000000762	GL194416.1	-	192723	221270	2175	208	68	189	93	219	197	133	12	94	162	370	301	304	329	440	301	400	311	405	328	251	103	257	144	246	5.60955	2.03775	5.2692	2.55197	5.68381	4.8573	3.02622	0.296716	2.71371	3.48321	12.4151	10.2907	10.2883	10.0173	11.6328	8.5343	13.9858	10.3974	12.7521
ENSAMEG00000000763	GL192402.1	-	354124	580055	2040	10	52	24	49	80	0	0	0	0	1	0	0	8	0	4	7	1	7	0	22	1	5	0	0	1	0.287537	1.6614	0.713384	1.43357	2.21368	0	0	0	0	0.0229242	0	0	0.288662	0	0.112751	0.211606	0.0372785	0.249511	0
ENSAMEG00000000765	GL192905.1	-	966048	983687	801	192	81	45	70	94	57	331	18	173	27	88	70	51	70	79	403	100	150	117	271	91	28	68	33	46	14.0602	6.59102	3.40661	5.21576	6.62446	3.81619	20.4505	1.20853	13.5615	1.57636	8.01784	6.49837	4.68671	5.78735	5.67135	31.0265	9.49414	13.617	10.0032
ENSAMEG00000000766	GL193534.1	-	226617	626045	4626	1120	1118	830	1206	943	81	177	3	147	54	939	872	628	909	1059	1138	1210	813	1229	1269	396	254	573	616	362	15.0404	16.6824	11.5223	16.4785	12.1866	0.994467	2.00539	0.0369366	2.11314	0.578142	15.6888	14.8447	10.583	13.7815	13.9414	16.0665	21.0664	13.5341	19.2689
ENSAMEG00000000767	GL193035.1	-	651863	664511	1026	33	6	30	23	25	10	34	8	27	13	178	139	311	191	273	194	55	89	77	297	24	21	32	90	28	1.88665	0.381157	1.77303	1.33793	1.37546	0.522686	1.63999	0.419335	1.65238	0.592543	12.6613	10.0741	22.3122	12.3282	15.3005	11.6604	4.07665	6.30761	5.13962
ENSAMEG00000000768	GL193090.1	-	176523	184142	1182	1426	799	1175	1294	1254	435	403	35	545	352	587	599	982	698	709	3255	3483	3678	5302	3151	598	778	474	1533	434	70.7662	44.0585	60.2785	65.3385	59.8873	19.736	16.8732	1.59246	28.9517	13.9267	36.2433	37.6832	61.1539	39.1068	34.4922	169.822	224.091	226.264	307.192
ENSAMEG00000000769	GL193091.1	-	481084	497572	1284	371	309	276	377	207	283	443	57	377	223	1443	1106	1235	1143	1638	1376	933	780	1048	1275	433	414	576	346	369	16.9485	15.6853	13.0343	17.5238	9.1004	11.8198	17.0745	2.38742	18.4362	8.12201	82.0178	64.0515	70.7998	58.9516	73.3568	66.0867	55.2592	44.1725	55.8964
ENSAMEG00000000770	GL192794.1	+	842782	849717	2112	8	1	3	6	6	4	2	0	2	3	28	15	22	22	29	10	15	13	4	9	77	32	23	3	58	0.222188	0.0308607	0.086133	0.169555	0.160366	0.101567	0.0468646	0	0.0594608	0.066428	0.967545	0.528124	0.766759	0.689832	0.789579	0.291989	0.540114	0.447581	0.129704
ENSAMEG00000000772	GL192453.1	+	177772	194215	573	430	362	330	399	264	232	249	221	151	274	605	471	343	478	594	476	572	466	539	500	315	151	372	277	345	44.0187	41.1769	34.9222	41.5595	26.0078	21.7131	21.5057	20.7423	16.5469	22.3625	77.0562	61.1231	44.0626	55.2443	59.6106	51.2287	75.9153	59.1362	64.4201
ENSAMEG00000000773	GL192373.1	+	2486619	2577036	2634	0	1	0	0	0	1	0	0	0	1	13	0	2	0	5	20	32	1	31	37	2	0	4	1	1	0	0.0247448	0	0	0	0.0203597	0	0	0	0.0177545	0.360192	0	0.0558913	0	0.109156	0.468247	0.923894	0.0276062	0.805997
ENSAMEG00000000774	GL192630.1	-	1247479	1269049	903	162	95	143	161	156	63	51	49	51	76	279	275	242	347	457	303	369	303	351	370	107	58	196	155	169	10.5233	6.85703	9.60264	10.6412	9.75196	3.74146	2.79506	2.91828	3.54631	3.93595	22.5488	22.6456	19.7269	25.4481	29.1018	20.6926	31.0761	24.3993	26.6199
ENSAMEG00000000775	GL193873.1	+	228384	238224	1914	6843	3353	1652	1695	1683	224	253	49	128	69	629	382	146	171	299	914	375	192	289	370	577	683	252	221	205	209.714	114.18	52.3372	52.8542	49.636	6.27616	6.54165	1.37681	4.19916	1.6859	23.9837	14.8409	5.61489	5.91655	8.98299	29.4486	14.8997	7.29426	10.3405
ENSAMEG00000000776	GL192373.1	-	2584945	2761559	2970	2	2	1	5	1	21	29	12	14	39	230	23	25	38	363	1202	434	182	542	1682	35	30	47	54	36	0.0395	0.0438908	0.0204167	0.100477	0.0190063	0.379185	0.483226	0.217292	0.295982	0.61409	5.65169	0.575851	0.619603	0.847308	7.02816	24.9579	11.1127	4.45592	12.4977
ENSAMEG00000000777	GL192911.1	+	70248	74371	1419	1022	900	1695	2469	1621	844	590	305	754	1111	349	353	938	668	707	1814	1232	1317	1403	2261	1083	2316	1523	1496	1869	42.2466	41.339	72.4318	103.846	64.4845	31.8969	20.5768	11.5594	33.3644	36.6147	17.9494	18.4983	48.6576	31.1751	28.6503	78.8344	66.0262	67.4878	67.7115
ENSAMEG00000000778	GL192819.1	+	717603	722979	1341	12	9	6	22	10	68	31	24	21	23	1355	846	554	694	900	229	316	300	249	165	17	33	25	17	13	0.524899	0.437435	0.271309	0.979143	0.420946	2.71937	1.14404	0.9625	0.983297	0.802089	73.7424	46.9116	30.4096	34.2724	38.5927	10.5309	17.9203	16.2673	12.7162
ENSAMEG00000000779	GL193035.1	-	675407	694295	3159	4545	3482	1778	2723	1550	1502	1353	71	1000	724	3474	6500	2368	5470	2955	5524	6998	4675	7317	4109	620	823	775	1935	431	84.3933	71.8422	34.1291	51.4458	27.6973	25.4981	21.1961	1.20872	19.8767	10.718	80.2578	153.004	55.1775	114.671	53.7898	107.836	168.466	107.61	158.625
ENSAMEG00000000780	GL192453.1	+	206049	228503	1104	111	41	20	119	28	18	21	4	2	10	104	62	62	41	79	294	18	52	19	129	38	14	25	40	10	5.89763	2.42056	1.09851	6.43324	1.43167	0.874362	0.941367	0.194854	0.113751	0.423599	6.87498	4.17601	4.13383	2.4594	4.11481	16.4225	1.23991	3.42497	1.17862
ENSAMEG00000000781	GL193090.1	-	188925	219323	1587	128	45	110	48	74	71	38	42	35	82	203	141	267	143	184	192	190	322	201	212	199	62	258	32	149	4.73104	1.84814	4.20299	1.80516	2.63214	2.39922	1.18499	1.42328	1.3848	2.41635	9.33525	6.60665	12.3841	5.96724	6.66703	7.4608	9.10468	14.7537	8.67374
ENSAMEG00000000782	GL192524.1	+	1613456	1648704	1251	0	4	4	8	12	0	0	0	0	0	2	1	1	5	3	22	5	5	3	22	2	3	10	0	3	0	0.208402	0.193885	0.381667	0.541476	0	0	0	0	0	0.116676	0.0594404	0.05884	0.264684	0.137897	1.08449	0.303949	0.290626	0.16423
ENSAMEG00000000783	GL192911.1	+	90813	93954	1434	2	44	2	5	12	0	4	0	0	1	31	32	22	27	23	20	48	17	8	21	54	26	15	3	25	0.0818096	1.99988	0.0845713	0.2081	0.472375	0	0.138045	0	0	0.0326118	1.57768	1.65936	1.12929	1.24689	0.922296	0.860086	2.54554	0.862029	0.382057
ENSAMEG00000000784	GL192388.1	+	2357628	2380435	1215	0	0	0	0	0	0	0	0	0	0	0	0	0	0	0	0	0	1	0	0	0	0	1	0	0	0	0	0	0	0	0	0	0	0	0	0	0	0	0	0	0	0	0.0598475	0
ENSAMEG00000000785	GL193873.1	+	240110	242270	1164	170	105	39	57	46	223	383	15	121	38	314	392	131	94	92	739	141	90	103	209	556	517	190	125	113	8.56682	5.87945	2.03167	2.92263	2.2308	10.274	16.2838	0.693037	6.5272	1.5267	19.6872	25.0422	8.28416	5.34797	4.54492	39.1519	9.21201	5.62227	6.05999
ENSAMEG00000000786	GL193090.1	+	210681	212260	435	31	7	12	9	26	11	8	0	2	3	25	19	21	19	31	34	34	27	44	38	9	2	23	13	12	4.18019	1.04884	1.67276	1.23482	3.37395	1.3561	0.910143	0	0.288692	0.322519	4.19428	3.2479	3.55353	2.89254	4.09793	4.82004	5.94399	4.51333	6.92709
ENSAMEG00000000787	GL192630.1	+	1274084	1284934	669	128	48	49	115	166	26	29	8	27	62	243	96	145	156	443	183	100	134	85	170	104	92	87	120	175	11.223	4.67644	4.44132	10.2594	14.0067	2.08418	2.14526	0.643105	2.53415	4.334	26.5086	10.6705	15.9541	15.4423	38.0776	16.8689	11.3674	14.5647	8.70122
ENSAMEG00000000788	GL193873.1	+	278116	280005	1383	243	93	90	60	64	252	138	24	65	46	762	750	311	291	354	811	378	236	410	279	542	491	191	125	170	10.3064	4.38289	3.94605	2.58929	2.61224	9.77161	4.93816	0.93327	2.95111	1.55546	40.2105	40.3253	16.5527	13.9343	14.7188	36.1626	20.7854	12.4083	20.3025
ENSAMEG00000000789	GL193090.1	+	259536	274493	4230	2	10	5	11	3	11	13	0	4	11	13	8	14	12	13	39	22	27	18	27	2	9	8	4	1	0.027734	0.154085	0.0716757	0.155205	0.0400346	0.139457	0.152094	0	0.0593764	0.121612	0.22429	0.140633	0.243623	0.187869	0.176724	0.568571	0.395522	0.464136	0.29142
ENSAMEG00000000790	GL192386.1	-	1497186	1517122	2988	5	4	8	16	12	5	3	0	1	0	33	17	31	21	31	50	15	52	4	21	333	113	391	34	258	0.0981551	0.0872528	0.16235	0.319589	0.226702	0.0897382	0.0496877	0	0.0210142	0	0.80601	0.423065	0.76368	0.465429	0.596586	1.03193	0.381767	1.26545	0.0916784
ENSAMEG00000000791	GL193796.1	+	138293	139459	255	0	0	0	0	0	0	0	0	0	0	0	0	0	0	1	1	0	0	2	0	0	0	0	0	0	0	0	0	0	0	0	0	0	0	0	0	0	0	0	0.225503	0.241836	0	0	0.537127
ENSAMEG00000000792	GL193796.1	-	162130	165701	1833	13	2	11	6	4	32	15	9	6	17	109	55	114	61	101	179	56	81	43	209	34	4	89	7	25	0.416011	0.0711161	0.363892	0.195362	0.123183	0.936215	0.404984	0.264057	0.205534	0.433721	4.33981	2.2312	4.57797	2.20385	3.16848	6.02215	2.32334	3.21325	1.60655
ENSAMEG00000000793	GL194416.1	+	223085	231348	1986	54	8	38	9	85	116	25	11	20	243	64	30	56	48	97	36	17	50	16	84	51	8	58	12	61	1.59492	0.262549	1.16024	0.270468	2.41599	3.13232	0.622973	0.297873	0.632332	5.72204	2.35184	1.12326	2.07558	1.60058	2.80856	1.11785	0.650965	1.83068	0.551732
ENSAMEG00000000794	GL193091.1	+	600504	706794	3828	1034	984	474	628	419	1951	1165	19	683	666	1048	1150	452	560	631	1672	724	432	605	925	3136	2152	1282	559	1485	15.8443	16.7542	7.50842	9.79129	6.1787	27.3321	15.0613	0.266932	11.2032	8.13628	19.98	22.3391	8.69154	9.68792	9.47871	26.9355	14.3832	8.20605	10.8236
ENSAMEG00000000796	GL192794.1	+	851299	859464	1953	299	222	142	186	163	66	48	1	20	37	137	107	75	99	155	279	264	220	251	184	160	182	77	88	109	8.98034	7.40885	4.40888	5.68411	4.7113	1.8123	1.21632	0.027537	0.643017	0.885978	5.11947	4.07399	2.82676	3.35697	4.56374	8.80973	10.2799	8.19111	8.80155
ENSAMEG00000000797	GL193873.1	-	285966	292390	1152	54	42	60	59	42	222	237	11	207	100	162	181	187	148	170	142	141	134	166	165	123	221	141	111	102	2.74957	2.37628	3.15821	3.05669	2.05803	10.3345	10.1813	0.513521	11.2827	4.05949	10.2629	11.6833	11.9487	8.50792	8.48571	7.60145	9.30797	8.45813	9.86832
ENSAMEG00000000798	GL192388.1	+	2396892	2420364	1294	0	6	0	2	0	0	15	1	5	0	2	94	2	240	1	1	115	14	70	0	0	15	1	16	0	0	0.302216	0	0.0922461	0	0	0.573675	0.0415608	0.242622	0	0.112798	5.40173	0.11377	12.2826	0.0444383	0.047657	6.75852	0.786712	3.70468
ENSAMEG00000000799	GL192388.1	+	2445004	2461043	1272	0	0	0	0	0	0	0	0	0	0	0	0	1	0	0	1	1	0	1	2	0	0	1	0	1	0	0	0	0	0	0	0	0	0	0	0	0	0.0578686	0	0	0.0484812	0.0597862	0	0.0538394
ENSAMEG00000000800	GL192524.1	-	1652302	1692981	3054	50	20	66	54	63	75	83	33	88	99	162	97	198	161	236	156	116	210	143	213	87	59	147	61	125	0.960339	0.426836	1.31044	1.0553	1.16447	1.31698	1.34499	0.581117	1.80929	1.51597	3.87127	2.36179	4.77229	3.49117	4.4436	3.15004	2.88853	5.00003	3.20667
ENSAMEG00000000801	GL192630.1	-	1287828	1293664	1056	0	0	0	0	4	0	0	1	0	1	5	3	4	2	5	2	0	2	4	6	3	2	8	1	10	0	0	0	0	0.213821	0	0	0.0509277	0	0.0442853	0.345552	0.21125	0.278822	0.125424	0.272269	0.116796	0	0.137717	0.259408
ENSAMEG00000000802	GL194771.1	+	27724	87058	1111	9	1	4	5	4	0	0	0	0	0	0	0	0	0	0	4	0	1	0	2	0	2	0	0	0	0.475173	0.058666	0.218317	0.268601	0.203236	0	0	0	0	0	0	0	0	0	0	0.222028	0	0.0654498	0
ENSAMEG00000000803	GL192630.1	+	1295871	1314906	942	137	45	97	53	103	14	8	33	9	16	69	43	63	50	96	39	32	53	35	47	37	44	60	23	44	8.53087	3.11359	6.244	3.35797	6.17222	0.797012	0.420289	1.884	0.59991	0.794315	5.34571	3.39435	4.92289	3.51507	5.86019	2.55314	2.58337	4.09117	2.54451
ENSAMEG00000000804	GL192453.1	-	251997	260882	519	2	3	1	1	1	1	0	0	0	0	0	0	1	0	0	13	16	51	0	27	1	3	1	2	0	0.226041	0.376751	0.116836	0.114997	0.108765	0.103329	0	0	0	0	0	0	0.141828	0	0	1.54467	2.34445	7.14537	0
ENSAMEG00000000805	GL194098.1	-	16985	82518	2292	0	0	0	0	0	0	0	0	0	0	0	0	0	0	0	3	0	2	2	5	0	0	0	0	0	0	0	0	0	0	0	0	0	0	0	0	0	0	0	0	0.0807175	0	0.0634509	0.0597589
ENSAMEG00000000806	GL193683.1	-	31218	103352	1523	51	8	19	18	15	4	0	0	0	0	8	2	5	1	6	1	0	0	0	4	2	2	4	3	1	2.042	0.35592	0.786427	0.733309	0.577974	0.146423	0	0	0	0	0.398529	0.101515	0.251225	0.045204	0.235508	0.0420943	0	0	0
ENSAMEG00000000807	GL192402.1	-	821870	932719	837	2	1	3	2	2	0	0	1	0	0	19	5	14	8	22	30	12	4	30	35	3	0	2	36	6	0.140161	0.0778708	0.217339	0.142612	0.134884	0	0	0.0642529	0	0	1.65667	0.444205	1.23121	0.632964	1.51143	2.21033	1.09029	0.347501	2.45461
ENSAMEG00000000808	GL192402.1	-	1210214	1638341	1904	210	664	161	779	166	99	140	19	127	103	309	608	126	613	357	546	495	259	476	551	154	117	172	233	141	6.46958	22.7301	5.12745	24.4187	4.92148	2.78841	3.6389	0.536667	4.18824	2.52985	11.844	23.7452	4.87118	21.321	10.7818	17.6842	19.7709	9.89134	17.1209
ENSAMEG00000000809	GL193796.1	+	222929	233232	891	0	0	0	0	0	304	98	655	77	565	0	0	0	0	1	0	0	1	0	0	614	562	523	84	1191	0	0	0	0	0	18.2972	5.44323	39.535	5.42634	29.6548	0	0	0	0	0.0645378	0	0	0.0816102	0
ENSAMEG00000000810	GL194098.1	-	100604	164854	1812	0	0	0	0	0	0	0	0	0	0	0	0	0	0	0	0	0	0	0	1	0	0	0	0	0	0	0	0	0	0	0	0	0	0	0	0	0	0	0	0	0	0	0	0
ENSAMEG00000000811	GL192453.1	+	261172	275373	519	6415	4416	5485	4289	5594	1561	1284	3540	760	1936	632	528	850	545	1067	925	374	727	446	864	2264	2688	2391	1640	2619	725.025	554.577	640.843	493.22	608.429	161.296	122.435	366.821	91.9476	174.446	88.8703	75.6494	120.554	69.5414	118.219	109.909	54.8015	101.857	58.8512
ENSAMEG00000000812	GL192402.1	+	2211977	2222107	2127	848	720	627	1166	641	637	1263	92	909	291	1551	3596	1112	3798	1320	2451	3045	2824	3492	1879	1124	1378	781	2080	765	23.3858	22.063	17.8748	32.7177	17.0116	16.0605	29.3863	2.32616	26.8343	6.39807	53.2171	125.716	38.4829	118.25	35.686	71.0619	108.87	96.5427	112.433
ENSAMEG00000000813	GL195558.1	-	21720	22294	414	0	0	0	0	0	0	0	0	0	0	0	0	0	0	0	0	0	2	0	0	0	0	0	0	0	0	0	0	0	0	0	0	0	0	0	0	0	0	0	0	0	0	0.351279	0
ENSAMEG00000000814	GL194257.1	+	64741	81275	888	0	1	0	0	2	0	0	0	2	0	0	0	4	0	0	2	1	0	0	0	0	2	0	1	2	0	0.0733985	0	0	0.127137	0	0	0	0.14142	0	0	0	0.331572	0	0	0.138892	0.0856397	0	0
ENSAMEG00000000815	GL192519.1	+	914589	921514	1320	1228	718	942	1017	1222	885	471	455	543	1044	2545	2131	2294	2901	3509	1093	2345	1826	2065	1412	1358	553	1395	1003	1698	55.112	35.8054	43.7036	46.4406	52.7777	36.3124	17.8342	18.7221	26.0867	37.355	142.108	121.24	129.196	146.99	154.383	51.571	136.444	101.589	108.201
ENSAMEG00000000816	GL192819.1	+	729547	732933	1338	623	237	134	161	200	748	102	3	33	231	1388	744	354	306	595	1122	312	343	273	559	178	105	99	120	88	27.3121	11.545	6.07283	7.18161	8.43779	29.9801	3.7727	0.120582	1.54865	8.07383	75.7078	41.3481	19.475	15.1454	25.5713	51.7127	17.7332	18.6406	13.9731
ENSAMEG00000000817	GL193796.1	+	257801	274866	891	3	0	4	2	15	4068	2274	2618	1295	4578	4	3	14	11	3	34	9	19	5	67	18596	22826	20000	3691	24162	0.1975	0	0.272223	0.133969	0.950317	244.845	126.305	158.019	91.2613	240.282	0.327634	0.25037	1.15659	0.817578	0.193613	2.35322	0.768162	1.55059	0.384308
ENSAMEG00000000818	GL193873.1	+	294627	297942	351	2871	1872	2622	2036	2587	1925	2971	4099	1718	2702	2470	2378	3596	2411	4514	2296	1386	3051	1955	2039	2100	3594	2377	3758	2450	479.788	347.615	452.968	346.197	416.049	294.111	418.894	628.043	307.334	359.999	513.567	503.783	754.124	454.888	739.514	403.39	300.292	632.058	381.441
ENSAMEG00000000819	GL193873.1	-	301634	308737	1401	2	1	2	1	0	0	1	0	2	0	14	10	20	1	6	51	13	37	16	37	26	27	9	62	4	0.0837366	0.0465224	0.0865633	0.0426004	0	0	0.0353241	0	0.0896368	0	0.729284	0.530763	1.05081	0.047269	0.246266	2.24488	0.705656	1.92037	0.782113
ENSAMEG00000000820	GL192819.1	+	733330	736544	1296	509	155	113	124	188	584	55	5	40	181	1008	492	304	226	513	885	248	292	241	489	176	83	86	73	101	23.0376	7.79519	5.28708	5.71043	8.18856	24.1655	2.10023	0.207483	1.93798	6.53126	56.7626	28.2292	17.2663	11.5483	22.7617	42.1113	14.5524	16.3832	12.735
ENSAMEG00000000821	GL194098.1	-	268598	344280	3324	2	0	0	0	0	0	0	0	0	0	0	0	0	0	0	0	1	0	0	1	3	1	0	0	5	0.0352933	0	0	0	0	0	0	0	0	0	0	0	0	0	0	0	0.0228785	0	0
ENSAMEG00000000822	GL192819.1	+	738750	744033	1449	567	185	335	200	423	435	323	180	197	279	1229	872	935	722	1068	666	386	763	479	517	666	682	583	290	480	22.9529	8.32154	14.0191	8.23785	16.4789	16.0994	11.0317	6.68071	8.53674	9.0045	61.9	44.7494	47.4978	32.9977	42.3833	28.3444	20.2585	38.2894	22.6389
ENSAMEG00000000824	GL192667.1	+	741573	751639	1095	607	229	326	269	397	314	236	495	222	262	764	596	822	755	1098	834	385	626	512	769	559	710	677	427	607	32.5161	13.6308	18.0528	14.6619	20.4659	15.3781	10.6661	24.3114	12.7301	11.1895	50.9198	40.4735	55.2571	45.6612	57.6607	46.9692	26.7384	41.5702	32.0216
ENSAMEG00000000825	GL192630.1	-	1344179	1576035	3058	140	73	57	91	95	148	116	47	100	157	349	168	216	196	429	645	1247	474	1172	844	360	254	307	214	411	2.68543	1.55591	1.13026	1.77605	1.75364	2.59545	1.87728	0.826568	2.05332	2.40096	8.32904	4.08518	5.19932	4.24456	8.06699	13.0072	31.0111	11.271	26.2469
ENSAMEG00000000827	GL192453.1	+	365015	538711	1752	31	15	27	19	15	10	12	5	13	14	24	16	11	17	27	16	14	22	7	20	40	19	60	6	30	1.03789	0.55803	0.934484	0.647249	0.483295	0.306093	0.338966	0.153481	0.465912	0.373695	0.999733	0.679086	0.462156	0.642583	0.886179	0.563179	0.60769	0.913084	0.273622
ENSAMEG00000000828	GL193173.1	+	154572	159977	621	647	312	619	417	764	454	360	843	287	776	419	379	638	583	796	638	353	680	432	882	510	690	744	581	866	61.1134	32.7464	60.4423	40.0771	69.4475	39.206	28.6893	73.0053	29.0191	58.4378	49.2413	45.3823	75.624	62.1715	73.7077	63.3563	43.2286	79.6232	47.6409
ENSAMEG00000000829	GL194257.1	-	84854	161712	792	417	207	428	187	440	242	433	212	319	675	190	130	199	174	319	288	169	265	189	369	327	409	531	257	641	30.8841	17.0351	32.7688	14.0919	31.3605	16.3862	27.0565	14.3956	25.2906	39.8568	17.508	12.2055	18.4952	14.5492	23.161	22.4248	16.2274	24.33	16.3427
ENSAMEG00000000830	GL193173.1	-	177696	245883	1395	212	351	208	294	280	149	262	80	232	190	342	339	297	398	356	486	608	555	601	592	368	210	454	253	375	8.91426	16.3996	9.04131	12.5784	11.3302	5.72796	9.29471	3.08414	10.4426	6.36947	17.892	18.0703	15.6716	18.894	14.6746	21.4844	33.145	28.9295	29.5045
ENSAMEG00000000831	GL193796.1	-	314879	316735	603	77	98	155	96	72	53	93	21	87	54	123	121	134	162	155	105	248	148	315	136	95	108	130	103	99	7.49026	10.5928	15.5868	9.5018	6.74016	4.71353	7.63263	1.87292	9.05934	4.18794	14.8866	14.9213	16.3575	17.7915	14.7811	10.7382	31.2768	17.8471	35.7751
ENSAMEG00000000832	GL192583.1	+	305145	312075	1233	0	3	1	7	2	0	2	3	3	4	247	80	146	109	303	19	11	50	23	22	3	2	0	0	0	0	0.158584	0.0491789	0.338834	0.0915634	0	0.0802741	0.130851	0.152775	0.151712	14.6198	4.82465	8.71606	5.85434	14.1309	0.95028	0.67845	2.94869	1.27747
ENSAMEG00000000833	GL192453.1	-	568084	592254	2973	1031	802	354	897	438	293	508	21	296	118	785	918	305	513	595	1676	938	526	1086	940	1322	1023	806	876	720	20.3417	17.5825	7.22022	18.0073	8.31638	5.28519	8.45624	0.379877	6.2516	1.85614	19.27	22.9608	7.55153	11.4271	11.5084	34.7648	23.9936	12.8651	25.0163
ENSAMEG00000000834	GL192667.1	+	753415	756862	1035	1	0	0	2	1	4	1	0	0	4	22	8	25	21	33	8	6	17	3	8	7	4	10	3	7	0.0566739	0	0	0.11533	0.0545399	0.207256	0.0478155	0	0	0.180735	1.55128	0.574763	1.77799	1.34367	1.83343	0.476662	0.440858	1.19435	0.198504
ENSAMEG00000000835	GL193796.1	-	321787	365848	1539	460	375	628	508	469	390	342	318	355	446	750	814	723	1193	1206	792	1137	832	1235	1069	437	371	689	747	613	17.5325	15.8815	24.7436	19.7005	17.2024	13.5898	10.9976	11.1124	14.4839	13.5525	35.5656	39.3301	34.5804	51.3353	45.061	31.7357	56.1837	39.3103	54.9561
ENSAMEG00000000836	GL192524.1	+	2002096	2156806	2175	8	54	2	76	6	0	0	0	0	0	3	5	10	3	2	1	10	7	0	0	20	6	13	21	22	0.215752	1.61821	0.0557587	2.08548	0.155721	0	0	0	0	0	0.100663	0.170942	0.338432	0.0913432	0.0528765	0.0283532	0.349646	0.234024	0
ENSAMEG00000000837	GL192402.1	+	2244803	2248191	678	0	0	0	0	0	0	0	0	0	0	0	0	0	0	0	0	0	0	0	0	0	0	0	0	0	0	0	0	0	0	0	0	0	0	0	0	0	0	0	0	0	0	0	0
ENSAMEG00000000838	GL192583.1	+	346828	370498	2554	803	666	1278	1284	1039	843	875	122	1050	949	2807	2362	3455	3763	4058	2374	3472	3276	4411	3453	1248	910	2556	1818	1675	18.4424	16.9963	30.3426	30.0052	22.9641	17.7009	16.9549	2.56896	25.8144	17.3768	80.21	68.7698	99.5766	97.5725	91.3656	57.3219	103.382	93.2707	118.278
ENSAMEG00000000839	GL192402.1	+	2268685	2269903	354	0	1	0	0	0	0	0	0	0	0	0	0	0	0	0	0	0	0	0	0	0	0	0	0	0	0	0.184118	0	0	0	0	0	0	0	0	0	0	0	0	0	0	0	0	0
ENSAMEG00000000840	GL195026.1	+	15276	17991	984	3	0	1	0	0	0	0	0	1	0	1	0	2	1	10	34	15	12	16	28	1	0	0	1	0	0.178834	0	0.0616236	0	0	0	0	0	0.0638115	0	0.0741672	0	0.149612	0.0673006	0.584382	2.13081	1.15927	0.886764	1.11356
ENSAMEG00000000841	GL193796.1	+	373645	401673	1176	50	6	18	9	20	48	83	25	64	30	419	218	542	225	467	475	72	232	109	576	62	34	83	36	59	2.49394	0.33254	0.928127	0.456759	0.960014	2.18888	3.49285	1.14328	3.41717	1.19299	26.0024	13.7844	33.9252	12.6704	22.835	24.9085	4.656	14.3451	6.34756
ENSAMEG00000000842	GL192402.1	-	2504585	2507123	744	18	1	15	3	12	64	56	48	45	78	89	21	48	28	89	140	19	30	18	135	20	2	18	17	17	1.41913	0.0876047	1.22253	0.240658	0.910465	4.61312	3.72498	3.46966	3.79782	4.90281	8.7302	2.09887	4.74896	2.49229	6.87874	11.6042	1.94209	2.93204	1.65686
ENSAMEG00000000843	GL192402.1	+	2585836	2639430	2184	616	419	162	711	667	2149	950	26	696	1269	3	2	1	2	0	18	5	1	11	13	48	45	31	16	35	16.8295	12.7199	4.57536	19.7647	17.5367	53.6775	21.8978	0.651268	20.355	27.641	0.101976	0.0692687	0.0342845	0.0616896	0	0.517013	0.177103	0.033868	0.350872
ENSAMEG00000000845	GL192453.1	+	842440	860911	1125	369	111	264	410	326	118	279	22	281	139	1877	1519	1555	2334	2959	1079	1060	1521	1236	1399	239	145	355	970	225	19.2397	6.43088	14.2296	21.7512	16.3576	5.62493	12.2733	1.05169	15.6837	5.77811	121.764	100.402	101.744	137.392	151.246	59.1466	71.6542	98.3102	75.2408
ENSAMEG00000000846	GL192386.1	+	1561969	1624702	1545	2	1	1	0	0	0	0	0	0	0	2	3	6	2	4	5	11	15	12	10	10	5	24	7	19	0.0764267	0.0424612	0.0395033	0	0	0	0	0	0	0	0.0950886	0.145329	0.287722	0.0862851	0.149845	0.200873	0.54497	0.710567	0.535378
ENSAMEG00000000847	GL195026.1	+	48836	51451	996	124	10	10	20	39	20	97	1	61	20	98	32	50	48	113	1768	270	638	394	2198	83	25	151	81	68	7.30274	0.654396	0.608811	1.19846	2.21035	1.07686	4.81971	0.0539957	3.84561	0.939062	7.18082	2.38907	3.69523	3.19151	6.52395	109.467	20.6154	46.5783	27.091
ENSAMEG00000000848	GL192373.1	+	2733690	2853314	1680	13	4	10	5	6	0	1	0	1	1	20	8	11	13	33	27	23	21	19	26	8	4	10	12	12	0.453897	0.155185	0.360938	0.177629	0.201603	0	0.0294577	0	0.0373753	0.0278365	0.868816	0.354095	0.481963	0.512446	1.12953	0.991095	1.04113	0.908934	0.774519
ENSAMEG00000000849	GL193090.1	-	277591	310723	3225	1008	328	442	445	497	356	317	17	305	215	5793	7405	3589	4478	4715	2794	998	2030	1270	1584	436	662	286	1099	200	18.3339	6.62894	8.31065	8.23536	8.69925	5.91982	4.8645	0.28349	5.93833	3.11769	131.093	170.74	81.917	91.9536	84.0705	53.4266	23.5336	45.7708	26.9688
ENSAMEG00000000850	GL192911.1	+	116773	122671	2091	4	0	1	2	5	9	1	0	2	5	86	35	112	33	75	53	17	32	16	51	11	8	18	0	7	0.112209	0	0.0289993	0.0570858	0.13498	0.230822	0.0236676	0	0.0600579	0.111825	3.00159	1.24467	3.9427	1.04514	2.06252	1.56309	0.618277	1.1128	0.524027
ENSAMEG00000000851	GL192794.1	-	864029	869219	1326	24	40	7	62	4	31	43	4	33	25	224	408	162	358	146	108	512	160	326	86	25	44	34	69	29	1.06167	1.96615	0.320108	2.79062	0.170283	1.25374	1.60485	0.162231	1.56266	0.881699	12.3285	22.88	8.99294	17.8794	6.33142	5.02274	29.364	8.77402	16.8369
ENSAMEG00000000852	GL193173.1	-	271270	288041	2208	226	117	223	226	249	280	345	46	236	388	577	536	603	695	935	714	401	531	423	868	640	340	981	373	854	6.00389	3.45372	6.12418	6.10888	6.36583	6.80059	7.73266	1.12041	6.71131	8.21781	19.0715	18.0511	20.1024	20.8449	24.3503	19.9416	13.8113	17.4871	13.1198
ENSAMEG00000000853	GL193683.1	-	124626	164330	1278	264	143	246	216	226	183	203	146	221	186	370	406	496	490	629	405	305	371	391	483	354	232	458	348	318	12.117	7.29299	11.672	10.0873	9.98234	7.67906	7.86093	6.14385	10.8581	6.80622	21.1289	23.6229	28.5681	25.391	28.3016	19.5427	18.1492	21.1089	20.9524
ENSAMEG00000000855	GL192819.1	-	744599	745277	612	31	7	17	40	21	62	48	68	29	43	7585	2870	5245	2750	8770	494	356	1047	389	489	62	92	55	42	38	2.97121	0.745499	1.68438	3.90086	1.93697	5.43286	3.88149	5.97552	2.97537	3.2858	904.505	348.714	630.847	297.574	824.024	49.7779	44.2371	124.399	43.5297
ENSAMEG00000000856	GL192794.1	-	873720	876446	345	338	60	65	123	140	267	1518	329	973	377	2035	4490	3863	7080	3609	3458	2214	4347	2932	3887	216	338	498	468	249	57.4674	11.3353	11.4245	21.2784	22.9068	41.5031	217.752	51.2856	177.088	51.1029	430.479	967.757	824.206	1359.03	601.533	618.111	488.03	916.205	582.013
ENSAMEG00000000857	GL192819.1	-	747370	751548	1467	884	251	330	408	438	2030	2322	614	1257	1076	5796	4485	4083	3044	5076	4655	1933	2270	1961	3039	2444	2615	1813	1257	1476	35.3464	11.1518	13.6404	16.599	16.8538	74.2085	78.3323	22.509	53.8021	34.3009	288.34	227.338	204.871	137.413	198.968	195.682	100.205	112.517	91.5451
ENSAMEG00000000859	GL192519.1	-	971380	985314	3000	141	38	131	47	195	151	74	71	91	325	382	257	432	403	519	252	104	456	102	421	238	101	488	119	432	2.7569	0.825586	2.64784	0.935037	3.66917	2.69925	1.22073	1.27279	1.90465	5.06624	9.29285	6.37017	10.5997	8.89607	9.94805	5.18012	2.63633	11.0526	2.32845
ENSAMEG00000000861	GL192373.1	+	2865265	2896124	2289	380	292	333	369	441	282	323	104	354	424	1172	796	892	1160	1325	940	1463	1301	1697	1455	457	295	740	614	579	9.73781	8.31452	8.82146	9.62128	10.8755	6.6068	6.98338	2.44346	9.71073	8.66251	37.3671	25.8587	28.6846	33.5604	33.286	25.3246	48.6056	41.3289	50.7719
ENSAMEG00000000862	GL192794.1	+	899481	903382	1887	176	50	115	48	80	76	43	9	41	29	146	234	166	141	136	283	210	140	275	144	121	130	83	115	42	5.47097	1.72702	3.69546	1.51817	2.39317	2.15988	1.12773	0.256501	1.36429	0.718703	5.64661	9.2211	6.4754	4.94836	4.14437	9.24859	8.46322	5.39484	9.98041
ENSAMEG00000000863	GL193091.1	+	816650	819525	1104	0	0	0	0	0	0	2	0	0	0	0	0	0	0	0	2	3	1	6	0	2	0	0	0	0	0	0	0	0	0	0	0.089654	0	0	0	0	0	0	0	0	0.111718	0.206652	0.0658647	0.372194
ENSAMEG00000000864	GL192841.1	-	37121	153818	3225	762	280	367	245	717	153	195	9	147	119	210	159	109	229	192	1053	587	761	605	1406	139	45	176	53	207	13.8595	5.65885	6.90047	4.53407	12.55	2.54419	2.99236	0.150083	2.86208	1.7256	4.75222	3.66612	2.48787	4.70241	3.42344	20.1354	13.8419	17.1584	12.8473
ENSAMEG00000000865	GL192453.1	+	873795	887871	990	1	1	1	0	0	0	0	1	0	0	0	0	0	0	0	1	0	0	0	0	0	0	0	0	0	0.05925	0.0658362	0.0612501	0	0	0	0	0.0543229	0	0	0	0	0	0	0	0.062291	0	0	0
ENSAMEG00000000866	GL194973.1	-	4118	27508	1920	5397	8256	2475	5424	3671	25	25	7	19	14	30	40	18	40	25	95	231	141	176	69	48	36	25	11	34	164.883	280.265	78.1657	168.605	107.929	0.698275	0.644388	0.196072	0.621365	0.340997	1.14032	1.54917	0.690083	1.37966	0.748739	3.05129	9.14953	5.33998	6.27768
ENSAMEG00000000867	GL192911.1	-	124110	127022	714	0	1	0	0	0	1	0	1	0	1	2	2	1	4	1	0	0	0	0	2	109	58	15	8	46	0	0.0912855	0	0	0	0.0751086	0	0.0753217	0	0.0654976	0.204427	0.208291	0.103094	0.371002	0.0805366	0	0	0	0
ENSAMEG00000000868	GL192519.1	+	1018255	1056724	3981	60	9	89	33	88	82	24	31	26	99	169	124	225	216	297	116	75	275	116	214	96	43	194	53	194	0.884062	0.14735	1.35563	0.494736	1.2478	1.10461	0.298351	0.418782	0.410087	1.16297	3.09814	2.31616	4.16026	3.59315	4.28999	1.79691	1.43271	5.02299	1.99551
ENSAMEG00000000869	GL192453.1	+	951852	966105	858	669	442	554	1007	757	618	593	53	558	770	1197	1786	1174	2594	2065	2539	1927	1866	2906	3118	946	862	1973	2289	1308	45.7365	33.5765	39.153	70.0478	49.8039	38.6268	34.2039	3.32206	40.8358	41.9689	101.815	154.787	100.719	200.215	138.396	182.489	170.798	158.142	231.951
ENSAMEG00000000870	GL192388.1	-	2463344	2472203	576	31	15	18	11	27	4	65	6	23	5	109	62	108	72	139	279	478	242	434	241	80	93	85	70	66	3.15691	1.69734	1.89493	1.13978	2.64604	0.372413	5.5847	0.560205	2.50726	0.405949	13.8106	8.00402	13.8017	8.27798	13.8766	29.8705	63.1093	30.5503	51.6006
ENSAMEG00000000871	GL195026.1	+	59634	61956	993	0	0	0	0	0	0	0	0	0	0	1	3	2	0	3	3	2	1	4	4	0	1	0	0	0	0	0	0	0	0	0	0	0	0	0	0.073495	0.224652	0.148256	0	0.173726	0.186309	0.153168	0.0732273	0.275866
ENSAMEG00000000872	GL193873.1	+	319386	340156	2486	1105	484	526	505	612	554	482	101	329	353	993	911	949	830	990	1308	588	664	559	1070	1231	1225	883	696	999	26.0726	12.6895	12.83	12.1239	13.8965	11.9508	9.59521	2.18494	8.30977	6.64045	29.1511	27.2494	28.0993	22.1101	22.8995	32.4465	17.9872	19.4218	15.3992
ENSAMEG00000000873	GL192794.1	+	919416	935965	3777	0	0	0	1	0	1	2	0	1	3	0	1	1	1	3	9	12	11	5	5	17	8	16	7	7	0	0	0	0.0158017	0	0.0141984	0.0262055	0	0.0166245	0.0371448	0	0.0196876	0.0194887	0.0175334	0.0456737	0.146946	0.241614	0.211772	0.0906589
ENSAMEG00000000874	GL195026.1	+	74982	77838	1020	0	0	0	4	0	0	0	0	0	0	112	87	175	76	138	17	7	13	5	33	0	1	0	0	0	0	0	0	0.234052	0	0	0	0	0	0	8.01355	6.34246	12.629	4.93432	7.77984	1.0278	0.521898	0.926756	0.335705
ENSAMEG00000000875	GL194223.1	+	290242	296977	1266	2	2	1	5	3	0	0	0	0	1	5	8	8	13	23	13	6	10	10	13	5	1	7	6	5	0.0926659	0.102967	0.047897	0.235716	0.133765	0	0	0	0	0.0369394	0.288233	0.469889	0.465143	0.680024	1.04469	0.633243	0.360417	0.574366	0.540946
ENSAMEG00000000876	GL192911.1	+	138957	232091	1133	0	0	0	0	0	337	244	46	138	250	0	0	0	0	1	0	0	1	2	0	322	171	143	27	379	0	0	0	0	0	15.951	10.6578	2.18347	7.64792	10.3189	0	0	0	0	0.050753	0	0	0.0641789	0.120889
ENSAMEG00000000877	GL193449.1	+	1558	3292	1707	0	0	0	0	0	0	0	0	0	0	2	0	1	0	2	0	0	0	0	0	0	1	0	0	0	0	0	0	0	0	0	0	0	0	0	0.0855074	0	0.0431218	0	0.0673734	0	0	0	0
ENSAMEG00000000879	GL193173.1	+	290871	326986	2265	288	120	210	122	309	260	200	37	193	513	384	266	390	393	482	309	295	375	295	478	232	79	322	142	346	7.45844	3.45313	5.62203	3.21472	7.70097	6.15592	4.36989	0.87852	5.35037	10.5919	12.3729	8.73278	12.6744	11.4905	12.2369	8.413	9.90471	12.0389	8.91952
ENSAMEG00000000880	GL193090.1	-	311681	324067	1029	5	8	4	11	8	5	8	1	5	2	46	33	36	25	25	19	5	12	9	19	5	4	5	13	3	0.285022	0.506728	0.235715	0.638013	0.438864	0.260581	0.384754	0.052264	0.305105	0.0908946	3.26249	2.38472	2.57524	1.60894	1.39706	1.13867	0.369524	0.847985	0.598983
ENSAMEG00000000881	GL192911.1	+	254858	289295	1644	73	32	53	68	84	236	149	102	131	254	502	218	434	329	638	445	329	496	463	571	321	141	365	179	337	2.60462	1.26867	1.95486	2.46865	2.88425	7.69836	4.48532	3.3367	5.00338	7.22529	22.2848	9.86038	19.432	13.2528	22.3157	16.6924	15.2189	21.9382	19.2871
ENSAMEG00000000882	GL192583.1	+	381801	387632	279	256	91	279	140	467	202	219	445	186	542	230	135	363	239	576	218	132	362	154	292	267	264	356	230	565	53.8219	21.2587	60.6376	29.9486	94.486	38.8271	38.8462	85.7777	41.8604	90.8487	60.1632	35.9806	95.7707	56.7294	118.716	48.1851	35.9797	94.3466	37.8011
ENSAMEG00000000883	GL192388.1	+	2546609	2567171	1296	811	849	711	649	626	50	133	69	89	52	795	205	742	228	794	89	77	169	59	112	459	554	836	251	521	36.7062	42.6975	33.2665	29.8877	27.2662	2.06896	5.07873	2.86327	4.31201	1.87639	44.7682	11.7622	42.1434	11.6505	35.2296	4.23493	4.51829	9.48208	3.1177
ENSAMEG00000000884	GL192386.1	-	1641263	1812745	3291	826	997	506	974	383	338	777	24	588	177	2074	2976	1541	1981	1413	1534	1979	1120	1900	1071	1450	1213	1338	1457	1052	29.0648	38.9816	18.4059	34.8719	12.9693	10.8735	23.0672	0.774273	22.1481	4.96548	90.7988	132.751	68.0452	78.6979	48.7414	56.748	90.2814	48.8545	78.0559
ENSAMEG00000000885	GL192583.1	+	564252	574762	1902	519	125	136	118	130	169	159	5	103	49	436	339	178	176	194	1947	703	682	794	730	850	633	361	210	315	16.0059	4.28351	4.33581	3.70274	3.85823	4.76501	4.13709	0.141377	3.40033	1.20478	16.7295	13.2534	6.88874	6.12797	5.8652	63.1272	28.1082	26.0733	28.5889
ENSAMEG00000000886	GL193449.1	-	46228	73260	1509	111	34	91	34	123	171	233	31	159	282	268	126	234	159	330	189	82	194	65	196	277	149	345	84	350	4.31477	1.46855	3.65674	1.34475	4.6012	6.07708	7.64144	1.10482	6.6161	8.73944	12.9614	6.20898	11.4145	6.97786	12.5752	7.72384	4.1325	9.34834	2.94993
ENSAMEG00000000887	GL194973.1	-	54940	82251	468	201	359	197	408	196	98	91	113	83	160	145	158	160	225	275	180	228	223	248	206	222	293	232	243	258	25.1926	49.9976	25.5248	52.0315	23.641	11.2297	9.62286	12.9853	11.1359	15.9881	22.6115	25.1044	25.1654	31.8384	33.7892	23.7185	37.0491	34.6482	36.2905
ENSAMEG00000000888	GL193090.1	+	338436	408015	2727	11	16	13	26	26	32	81	97	92	50	280	487	370	688	381	66	64	139	66	122	38	21	114	85	54	0.236609	0.382415	0.289068	0.569037	0.538199	0.629293	1.46997	1.91296	2.11835	0.857449	7.49342	13.2795	9.98727	16.7077	8.03399	1.49252	1.78477	3.7064	1.65747
ENSAMEG00000000889	GL193683.1	-	188936	277227	2436	941	1136	831	1481	775	39	114	18	114	42	654	929	743	927	721	342	643	378	547	232	111	661	258	3805	109	22.6588	30.3949	20.6855	36.2852	17.9589	0.858569	2.31599	0.397387	2.93847	0.806298	19.5933	28.3581	22.4513	25.2009	17.0196	8.65784	20.0734	11.2833	15.3779
ENSAMEG00000000890	GL192519.1	+	1058462	1061104	381	0	0	0	0	0	1	0	0	0	0	1	2	0	0	0	2	0	3	0	5	1	1	5	1	2	0	0	0	0	0	0.140755	0	0	0	0	0.19155	0.390341	0	0	0	0.323717	0	0.572557	0
ENSAMEG00000000891	GL192519.1	+	1065455	1066999	429	0	0	0	0	0	0	0	0	0	0	0	0	0	0	0	1	0	0	0	0	0	1	0	0	0	0	0	0	0	0	0	0	0	0	0	0	0	0	0	0	0.143749	0	0	0
ENSAMEG00000000892	GL192519.1	+	1124339	1162132	2811	20	3	6	2	6	46	74	8	45	7	37	24	2	15	14	35	10	15	7	17	33	35	17	3	14	0.417343	0.0695602	0.129429	0.042464	0.120488	0.877576	1.30281	0.153055	1.00519	0.116456	0.960612	0.634877	0.052372	0.353382	0.286391	0.767835	0.270537	0.388019	0.170539
ENSAMEG00000000893	GL193660.1	+	40154	101584	2739	213	66	84	100	233	134	48	1	20	131	60	12	31	5	37	351	146	156	138	296	107	60	221	92	53	4.64981	1.60095	1.89563	2.22118	4.89489	2.67439	0.884061	0.0200148	0.467366	2.27996	1.62964	0.332087	0.849228	0.12323	0.791819	8.05564	4.13212	4.22162	3.51721
ENSAMEG00000000894	GL192794.1	-	948182	952086	1212	51	37	50	21	46	29	8	1	17	26	86	51	109	70	65	53	55	97	50	62	103	62	129	33	88	2.65442	2.13982	2.69022	1.11211	2.30403	1.37995	0.351297	0.0477193	0.947151	1.07888	5.56906	3.365	7.11923	4.11328	3.31651	2.9001	3.71131	6.2585	3.03832
ENSAMEG00000000895	GL192453.1	-	970968	994704	2322	22060	8091	6756	8144	12205	4666	2101	75	1311	2799	5218	5037	3927	4118	4003	16352	3865	3391	3828	9030	3816	5320	2479	8784	2141	557.272	227.112	176.429	209.328	296.709	107.763	44.7788	1.73707	35.4515	56.3721	164.002	161.305	124.488	117.446	99.1323	434.28	126.583	106.191	112.901
ENSAMEG00000000896	GL192630.1	-	1594139	1609533	1431	173	95	109	82	173	190	122	108	86	350	449	229	363	255	568	290	131	398	178	470	264	173	414	467	324	7.09137	4.32697	4.6188	3.42	6.82435	7.12036	4.21919	4.05884	3.77358	11.4381	22.8989	11.8997	18.6723	11.8009	22.8245	12.4974	6.96177	20.2239	8.51859
ENSAMEG00000000897	GL192373.1	+	2983694	3029423	1728	31	23	34	20	40	55	24	7	26	116	120	61	109	61	137	81	102	144	87	145	158	98	264	59	310	1.1963	0.986244	1.35637	0.785305	1.4855	1.94047	0.781405	0.24767	1.07405	3.56893	5.76162	2.98418	5.27853	2.65767	5.18285	3.28626	5.10322	6.88876	3.91979
ENSAMEG00000000898	GL193090.1	+	441103	451718	1512	70	12	22	17	23	52	147	6	91	46	1078	1064	781	858	1214	226	65	108	67	249	85	43	198	62	66	2.71563	0.517285	0.882293	0.671041	0.858679	1.84433	4.81143	0.213411	3.77906	1.42275	52.0324	52.3274	38.0215	37.5794	46.1699	9.21759	3.26926	5.19391	3.03466
ENSAMEG00000000899	GL192911.1	+	297891	314370	3252	23	3	9	2	1	4	4	0	1	3	33	40	8	15	18	68	33	86	8	38	145	73	73	1	64	0.414859	0.0601272	0.167816	0.0367055	0.0173582	0.0659625	0.0608721	0	0.0193083	0.0431414	0.740577	0.914636	0.18108	0.30546	0.318283	1.28949	0.771705	1.92296	0.168472
ENSAMEG00000000900	GL192794.1	-	952692	957646	801	232	91	110	108	164	139	80	165	64	117	315	245	288	236	317	278	137	223	171	249	297	315	260	159	261	17.8824	7.79394	8.76497	8.47015	12.1651	9.79531	5.20252	11.6605	5.28068	7.18993	30.2088	23.9398	27.8572	20.5372	23.9534	22.5279	13.6906	21.308	15.3886
ENSAMEG00000000901	GL193449.1	-	116175	120692	267	0	0	0	0	0	1	0	0	0	1	0	0	0	0	0	0	1	0	3	0	9	0	0	0	11	0	0	0	0	0	0.200852	0	0	0	0.175151	0	0	0	0	0	0	0.284824	0	0.76948
ENSAMEG00000000902	GL192630.1	+	1639409	1695580	1074	0	0	0	0	0	0	0	0	0	0	0	0	0	0	0	4	0	7	0	4	1	3	4	0	3	0	0	0	0	0	0	0	0	0	0	0	0	0	0	0	0.229676	0	0.473932	0
ENSAMEG00000000903	GL193449.1	+	157464	212729	2007	0	0	0	0	0	5	3	20	5	4	1	1	0	0	0	9	7	33	2	46	7	0	12	0	14	0	0	0	0	0	0.137718	0.0762542	0.552437	0.16125	0.0960766	0.0374836	0.0381921	0	0	0	0.285061	0.273414	1.23245	0.070348
ENSAMEG00000000904	GL193989.1	-	110859	123762	1224	5	8	4	5	5	7	0	0	2	12	15	34	24	35	21	50	11	29	2	57	34	14	45	37	55	0.239614	0.425999	0.198162	0.243804	0.230592	0.306693	0	0	0.102599	0.458483	0.894369	2.06555	1.44331	1.89366	0.986574	2.51912	0.683438	1.72282	0.111902
ENSAMEG00000000905	GL193948.1	+	47726	48122	384	0	0	0	0	0	0	0	0	0	0	0	0	0	0	0	0	0	0	0	0	0	0	0	0	0	0	0	0	0	0	0	0	0	0	0	0	0	0	0	0	0	0	0	0
ENSAMEG00000000906	GL192519.1	-	1749625	1769735	936	0	0	0	0	0	0	0	0	0	0	4	4	16	12	8	1	2	10	2	1	0	0	9	1	0	0	0	0	0	0	0	0	0	0	0	0.311883	0.317777	1.25827	0.849023	0.49148	0.0658848	0.162496	0.776866	0.146333
ENSAMEG00000000907	GL192388.1	-	2577070	2589808	1134	3353	854	908	2430	2720	4422	860	22	575	3613	8746	4816	3873	3803	8328	4576	1602	2732	1178	2987	5963	3327	2716	1566	4526	173.438	49.0846	48.5529	127.893	135.398	209.119	37.5313	1.04335	31.8382	148.997	562.864	315.8	251.4	222.089	422.298	248.848	107.433	175.182	71.141
ENSAMEG00000000908	GL192794.1	-	959596	969831	1641	77	62	85	112	58	29	36	19	30	17	252	338	684	356	204	380	302	385	355	259	159	147	283	154	91	2.75236	2.46254	3.14089	4.07344	1.99514	0.947714	1.08568	0.622678	1.14791	0.484467	11.2072	15.3161	30.6816	14.3667	7.14847	14.2803	13.9954	17.0598	14.8152
ENSAMEG00000000909	GL193989.1	-	172846	193937	1287	325	248	201	182	332	236	140	159	106	259	35	46	66	66	58	40	16	50	19	45	212	150	264	78	325	14.8125	12.5595	9.47021	8.44005	14.5618	9.8338	5.38342	6.64411	5.17156	9.4112	1.98471	2.65778	3.77482	3.39609	2.59144	1.91665	0.94543	2.82497	1.01103
ENSAMEG00000000910	GL192583.1	-	580423	595047	936	23	4	3	9	3	1597	2043	355	1604	908	231	204	162	199	250	81	26	27	23	75	2083	3421	1282	542	2043	1.44137	0.278538	0.194351	0.573877	0.180926	91.4991	108.019	20.3972	107.603	45.3663	18.0112	16.2067	12.74	14.0796	15.3587	5.33667	2.11245	2.09754	1.68283
ENSAMEG00000000911	GL192667.1	-	757693	759677	693	395	207	407	351	421	289	173	376	164	354	515	428	551	524	731	393	266	568	358	382	455	507	544	306	487	33.4339	19.4687	35.6126	30.2292	34.2929	22.3642	12.3544	29.1792	14.8595	23.8888	54.2352	45.925	58.526	50.074	60.6563	34.972	29.1902	59.5988	35.3783
ENSAMEG00000000912	GL192519.1	+	1999777	2014098	484	0	0	0	0	0	0	0	0	0	0	1	0	0	2	1	1	1	0	0	1	0	1	0	0	0	0	0	0	0	0	0	0	0	0	0	0.150786	0	0	0.273652	0.118808	0.127414	0.157124	0	0
ENSAMEG00000000913	GL193606.1	+	224866	235357	1593	2	2	7	0	4	6	1	3	2	9	34	11	71	12	68	26	14	41	15	94	2	1	12	0	10	0.0736441	0.0818303	0.266455	0	0.141742	0.201987	0.0310665	0.10128	0.0788331	0.264211	1.55765	0.513471	3.28075	0.498861	2.45462	1.00651	0.668344	1.8715	0.644856
ENSAMEG00000000914	GL193948.1	+	270091	302764	1134	0	0	0	0	0	0	0	0	0	0	0	1	0	0	0	0	0	0	0	0	0	0	0	0	0	0	0	0	0	0	0	0	0	0	0	0	0.0655731	0	0	0	0	0	0	0
ENSAMEG00000000915	GL193173.1	+	346489	398969	2643	144	54	58	130	103	759	513	71	357	626	632	2853	1218	2401	653	848	411	550	490	751	1658	1884	1421	2466	1587	3.19587	1.33167	1.33068	2.93561	2.19986	15.4004	9.6057	1.44471	8.48136	11.0765	17.4513	80.2682	33.9219	60.1602	14.2072	19.7861	11.8259	15.1317	12.6966
ENSAMEG00000000916	GL193948.1	-	403880	404458	468	0	0	0	0	0	0	0	0	0	0	0	0	0	0	0	0	0	0	0	0	0	0	0	0	0	0	0	0	0	0	0	0	0	0	0	0	0	0	0	0	0	0	0	0
ENSAMEG00000000917	GL193975.1	-	140164	213728	1353	492	207	237	186	323	457	1140	1305	763	889	261	159	300	262	527	365	215	263	218	613	434	357	608	307	741	21.33	9.97178	10.6217	8.20479	13.476	18.1137	41.698	51.8718	35.4096	30.7275	14.0783	8.73853	16.3213	12.8238	22.3978	16.6363	12.0845	14.1345	11.0343
ENSAMEG00000000918	GL192819.1	-	755455	756990	1518	17	2	2	2	5	3	5	1	3	6	64	37	58	19	37	36	7	19	12	19	24	4	16	0	9	0.656902	0.0858734	0.0798915	0.078634	0.185932	0.105983	0.163007	0.035428	0.124092	0.184843	3.07691	1.81246	2.81246	0.828889	1.40159	1.46249	0.350683	0.910131	0.541373
ENSAMEG00000000919	GL192819.1	+	758980	761819	837	5	3	1	6	1	4	7	0	3	5	38	20	38	16	31	16	7	11	8	15	7	1	9	7	15	0.350403	0.233612	0.0724464	0.427837	0.0674419	0.256285	0.413886	0	0.225056	0.279363	3.31333	1.77682	3.34186	1.26593	2.12975	1.17884	0.636005	0.955629	0.654564
ENSAMEG00000000920	GL192386.1	+	1814201	1820785	633	279	77	253	129	301	287	223	784	161	349	360	340	506	499	603	337	385	451	470	375	436	547	559	195	584	25.8538	7.92843	24.2359	12.1629	26.8422	24.3145	17.4345	66.6087	15.9704	25.7837	41.5055	39.9406	58.8406	52.2049	54.7779	32.8312	46.2536	51.8078	50.8489
ENSAMEG00000000921	GL192402.1	-	2658352	2660786	777	0	0	0	0	0	0	0	0	0	0	1	3	1	2	3	0	2	0	0	1	0	2	1	0	0	0	0	0	0	0	0	0	0	0	0	0.093926	0.287104	0.0947347	0.17046	0.22202	0	0.195748	0	0
ENSAMEG00000000922	GL193606.1	-	244844	311065	2372	878	762	1139	1051	764	600	370	343	289	794	561	407	638	771	808	1588	1109	1524	1247	2116	498	352	1200	559	679	21.7122	20.9383	29.1173	26.4448	18.1817	13.5651	7.71962	7.77674	7.65028	15.6541	17.2606	12.7591	19.7987	21.5255	19.5879	41.2854	35.5554	46.7189	36.003
ENSAMEG00000000923	GL192373.1	-	3032128	3101681	3840	0	2	1	0	1	1488	563	82	527	1597	44	35	29	46	83	28	23	13	33	48	34	5	47	4	64	0	0.0339468	0.015791	0	0.0147002	20.7807	7.25581	1.14842	8.61735	19.449	0.836235	0.67776	0.5559	0.793306	1.24291	0.449664	0.455496	0.246169	0.588532
ENSAMEG00000000924	GL192402.1	-	2742551	2767285	1200	167	148	157	316	138	2020	1314	126	829	984	1462	2565	1207	2511	1724	2964	759	1357	1163	1547	526	331	920	555	521	8.16317	8.0386	7.93342	15.7166	6.49162	90.273	54.1905	5.64687	43.3778	38.3475	88.9146	158.944	74.0383	138.573	82.6129	152.32	48.1004	82.2282	66.3722
ENSAMEG00000000925	GL192667.1	+	760572	766782	684	153	47	110	63	107	64	26	71	29	65	121	97	125	86	165	156	96	168	93	206	216	209	235	77	215	13.1208	4.4786	9.75166	5.49714	8.83045	5.01778	1.88116	5.5824	2.66217	4.44407	12.9103	10.5452	13.4519	8.32639	13.8714	14.0647	10.6734	17.8597	9.31139
ENSAMEG00000000926	GL193090.1	-	459418	626107	449	88	61	44	51	78	72	93	24	55	81	165	230	130	239	218	140	63	114	47	107	142	177	239	92	178	11.4963	8.8549	5.94222	6.77916	9.80626	8.59952	10.2505	2.87464	7.69149	8.4365	26.8191	38.0908	21.3122	35.2505	27.9191	19.2284	10.6704	18.4621	7.16868
ENSAMEG00000000927	GL192583.1	-	599232	609347	1224	0	0	0	0	1	3	3	0	1	5	5	3	2	1	6	0	0	1	0	0	448	223	271	28	392	0	0	0	0	0.0461183	0.13144	0.121297	0	0.0512995	0.191035	0.298123	0.182255	0.120276	0.0541044	0.281878	0	0	0.0594074	0
ENSAMEG00000000928	GL192819.1	-	767159	771743	585	1255	804	594	818	840	532	569	333	410	392	827	835	831	708	996	937	537	614	660	819	1270	1853	905	861	1288	125.838	89.5778	61.5705	83.4545	81.0547	48.769	48.1355	30.6131	44.0071	31.3367	103.171	106.138	104.562	80.1478	97.9028	98.7744	69.8082	76.3193	77.2637
ENSAMEG00000000929	GL192667.1	+	785274	793466	2640	298	113	238	130	96	603	371	9	241	316	323	289	320	327	243	1803	1349	973	1249	1637	322	222	469	225	180	6.62119	2.78981	5.46657	2.93895	2.05268	12.249	6.9547	0.18334	5.73202	5.59766	8.92906	8.14016	8.92229	8.20272	5.2929	42.1165	38.8594	26.7998	32.4001
ENSAMEG00000000930	GL193090.1	+	709252	783307	1419	82	98	76	194	91	6	5	0	15	14	57	133	22	148	53	275	46	74	80	249	107	66	74	28	103	3.38965	4.50136	3.24768	8.15965	3.62004	0.226755	0.17438	0	0.663748	0.461391	2.93156	6.96961	1.14122	6.90707	2.14776	11.9512	2.46526	3.79203	3.86096
ENSAMEG00000000931	GL193173.1	+	679708	822179	2922	3120	2659	2065	2091	1980	0	4	0	7	2	489	475	308	383	524	64	77	48	63	41	782	363	686	67	685	62.6323	59.3114	42.8531	42.7096	38.2507	0	0.0677467	0	0.150422	0.0320091	12.2134	12.0879	7.75891	8.68026	10.312	1.35071	2.004	1.19449	1.47655
ENSAMEG00000000932	GL192388.1	+	2638770	2652186	954	97	126	88	129	119	205	318	39	328	163	259	582	382	1010	283	327	401	678	292	392	82	90	229	71	94	5.96413	8.6084	5.59341	8.07037	7.04131	11.5237	16.4963	2.19854	21.5884	7.9903	19.8134	45.3642	29.4744	70.1112	17.0581	21.1378	31.9657	51.6777	20.9615
ENSAMEG00000000933	GL192386.1	-	1826458	1883800	4329	247	213	199	297	151	144	305	4	239	90	562	587	345	585	671	502	431	287	534	592	383	198	451	450	355	3.34682	3.20695	2.78745	4.09469	1.96899	1.78387	3.48675	0.0496925	3.46661	0.972251	9.47449	10.083	5.86627	8.94917	8.91306	7.15117	7.57143	4.82077	8.44775
ENSAMEG00000000934	GL193173.1	-	215363	902628	723	121	77	124	114	109	183	240	340	178	181	210	151	244	221	329	252	205	270	283	362	291	376	371	261	300	6.96522	4.92512	7.37887	6.67702	6.0382	9.63085	11.6559	17.9442	10.9683	8.30669	15.0401	11.019	17.6257	14.3626	18.5658	15.2506	15.2992	19.2669	19.0195
ENSAMEG00000000935	GL192402.1	-	2926716	2928589	735	1	0	5	2	14	8	60	20	37	4	198	192	1074	94	232	323	138	267	129	487	2473	1470	278	14890	459	0.0798061	0	0.412501	0.162403	1.07522	0.583701	4.03992	1.46339	3.16089	0.254505	19.6601	19.4246	107.559	8.46944	18.1507	27.1004	14.2784	26.4147	12.0196
ENSAMEG00000000936	GL192911.1	-	315086	322142	1425	737	502	563	442	596	537	387	217	257	416	761	506	685	499	915	753	262	628	310	650	660	459	713	249	550	30.3373	22.9609	23.9572	18.5123	23.6095	20.2091	13.4402	8.18961	11.3243	13.6522	38.9742	26.4043	35.3839	23.19	36.9231	32.5867	13.9822	32.0455	14.8982
ENSAMEG00000000937	GL192819.1	+	782189	787278	993	1872	981	1267	1144	1295	1068	1626	1696	1074	803	2153	2014	1784	1624	2461	2141	1254	1681	1338	1604	1912	2789	1746	1226	1544	110.581	64.3902	77.3695	68.7589	73.6166	57.678	81.0364	91.8533	67.9125	37.8172	158.235	150.817	132.244	108.306	142.513	132.962	96.0365	123.095	92.2772
ENSAMEG00000000938	GL193448.1	-	73244	151010	3929	934	1193	1254	1060	1227	226	271	15	297	320	1124	840	923	823	1114	964	1239	1371	911	1562	826	389	1595	544	1051	13.944	19.7906	19.3534	16.1019	17.6286	3.08471	3.41347	0.205318	4.74645	3.80883	20.8781	15.8978	17.2922	13.8718	16.304	15.1306	23.9816	25.3733	15.879
ENSAMEG00000000939	GL193035.1	-	727781	733996	507	0	6	2	46	2	0	1	0	0	0	0	4	1	28	0	5	4	4	5	2	0	0	1	9	0	0	0.771336	0.239202	5.41504	0.222678	0	0.0976114	0	0	0	0	0.586666	0.145185	3.65733	0	0.608167	0.599985	0.573686	0.675382
ENSAMEG00000000941	GL192402.1	+	2962582	2975406	1098	186	79	214	84	205	183	249	540	159	315	249	180	335	183	405	223	107	259	110	318	212	160	263	195	202	9.93652	4.68948	11.8183	4.56593	10.5392	8.93792	11.2229	26.449	9.09262	13.4163	16.5502	12.1902	22.4581	11.0373	21.2102	12.5246	7.41088	17.1522	6.86085
ENSAMEG00000000942	GL194881.1	+	7119	23124	285	0	0	0	0	0	0	3	0	2	1	3	0	12	2	3	5	3	24	5	3	39	89	27	15	79	0	0	0	0	0	0	0.520937	0	0.440636	0.164089	0.768216	0	3.09932	0.464729	0.605296	1.0819	0.800506	6.12334	1.20147
ENSAMEG00000000943	GL194948.1	-	73928	93675	1434	2901	6366	7072	8536	3113	322	770	443	588	376	128	333	1045	57	212	3152	773	1056	1074	4112	2070	2974	875	31346	707	118.665	289.346	299.044	355.269	122.542	12.0419	26.5736	16.614	25.7468	12.262	6.5143	17.2677	53.6411	2.63233	8.50116	135.549	40.9938	53.5472	51.2912
ENSAMEG00000000944	GL192841.1	+	256121	393409	641	0	1	0	0	0	1	1	4	0	2	0	0	0	2	0	116	79	416	3	214	1	0	0	0	0	0	0.101682	0	0	0	0.0836623	0.0772059	0.335599	0	0.145914	0	0	0	0.206627	0	11.1599	9.37254	47.1908	0.320517
ENSAMEG00000000945	GL194881.1	-	32870	92682	5523	177	74	264	142	175	232	90	224	135	297	462	268	543	543	681	323	380	692	506	550	528	94	840	190	910	1.87984	0.873287	2.89849	1.53449	1.78862	2.25269	0.806448	2.18118	1.5348	2.51481	6.10484	3.60827	7.23694	6.51087	7.09029	3.60652	5.23235	9.11073	6.27427
ENSAMEG00000000946	GL192911.1	-	340425	352333	2685	12	3	6	3	6	3	0	0	1	1	6	9	11	4	7	89	10	19	15	95	22	9	17	4	3	0.262156	0.0728244	0.135503	0.0666851	0.126143	0.059919	0	0	0.0233857	0.0174172	0.163085	0.249251	0.301563	0.0986575	0.149915	2.04412	0.283233	0.514555	0.382591
ENSAMEG00000000947	GL192841.1	+	471688	737738	3621	489	721	390	763	435	1936	3132	123	2195	954	1638	2026	933	2041	1608	3027	1604	1042	1667	2063	1390	538	1329	822	1039	7.92144	12.978	6.53098	12.5762	6.78134	28.6724	42.8057	1.82682	38.0628	12.3209	33.0136	41.6054	18.9663	37.3275	25.5358	51.5519	33.6871	20.9248	31.5279
ENSAMEG00000000948	GL192819.1	-	788265	799973	3735	1694	895	821	642	568	395	370	34	168	152	3998	2968	1567	1645	2350	2247	1175	1041	1038	1112	1899	1657	868	1112	837	26.604	15.6183	13.3289	10.2588	8.58445	5.67145	4.90252	0.489561	2.82431	1.90317	78.1195	59.0898	30.8822	29.1669	36.18	37.0999	23.9241	20.2667	19.0324
ENSAMEG00000000949	GL193683.1	+	350890	393724	2310	64	67	80	137	72	87	84	22	88	115	428	231	279	434	561	290	274	317	258	445	180	79	374	229	278	1.62514	1.89044	2.1	3.53965	1.75944	2.01974	1.7996	0.512188	2.39202	2.32814	13.5219	7.43599	8.89042	12.4421	13.9651	7.74189	9.02042	9.97859	7.64883
ENSAMEG00000000951	GL192794.1	-	972397	983544	831	11	21	43	43	19	28	24	20	20	23	43	46	63	48	44	52	32	68	36	50	49	75	73	30	44	0.776453	1.64709	3.13769	3.0883	1.29065	1.80694	1.42929	1.29434	1.5112	1.29435	3.77637	4.11619	5.58046	3.8252	3.04469	3.8589	2.92845	5.95018	2.9668
ENSAMEG00000000952	GL193606.1	+	364579	378201	1875	40	40	41	48	49	22	30	12	39	47	53	35	71	65	73	83	109	72	145	127	23	49	40	101	53	1.25136	1.39046	1.32594	1.52789	1.4752	0.62923	0.791824	0.34419	1.30604	1.17225	2.06292	1.38805	2.78732	2.29576	2.23879	2.72984	4.42093	2.79224	5.29608
ENSAMEG00000000953	GL192794.1	+	984274	1034808	4596	19	294	180	259	27	10	6	4	8	7	107	71	170	59	115	50	33	54	23	52	9	7	17	7	2	0.257805	4.43264	2.52481	3.57575	0.35256	0.124052	0.068687	0.0497615	0.116198	0.0757245	1.80637	1.22127	2.89464	0.903818	1.52969	0.713256	0.58052	0.908303	0.364359
ENSAMEG00000000954	GL193606.1	-	379724	403207	648	312	388	377	573	318	305	376	152	369	538	496	494	592	998	952	568	781	715	961	909	351	312	649	598	640	28.2425	39.0263	35.2784	52.7754	27.7017	25.2414	28.7158	12.615	35.7557	38.8267	55.8616	56.688	67.2476	101.993	84.4799	54.0548	91.6567	80.233	101.563
ENSAMEG00000000955	GL193873.1	+	368608	407309	540	181	62	64	41	57	65	40	8	22	33	172	120	60	83	127	132	61	27	42	58	126	92	55	47	72	19.6611	7.48339	7.18668	4.5315	5.95849	6.45517	3.66585	0.796736	2.55813	2.85788	23.2457	16.5244	8.17877	10.1788	13.5239	15.0744	8.59061	3.63573	5.32651
ENSAMEG00000000956	GL192911.1	+	366449	379088	2712	446	310	309	285	378	235	168	15	137	127	519	618	375	436	398	602	605	581	648	531	955	438	574	265	563	9.64648	7.45027	6.90893	6.27202	7.86787	4.64693	3.06569	0.297454	3.17194	2.18997	13.9664	16.9449	10.1782	10.6466	8.43888	13.6889	16.965	15.5779	16.3634
ENSAMEG00000000957	GL193873.1	-	443242	447794	993	614	253	349	347	347	639	611	260	453	447	2498	3934	3285	4805	2784	2676	1754	2240	2100	1727	929	1888	990	852	739	36.2696	16.6062	21.3117	20.8561	19.7258	34.5096	30.4509	14.0813	28.6446	21.0514	183.591	294.594	243.51	320.449	161.217	166.187	134.329	164.029	144.83
ENSAMEG00000000958	GL193035.1	-	748068	750470	459	0	0	0	1	0	0	0	0	0	0	3	1	0	0	1	1	3	5	2	1	0	2	0	1	0	0	0	0	0.130029	0	0	0	0	0	0	0.476997	0.162004	0	0	0.125279	0.134353	0.497046	0.792099	0.298404
ENSAMEG00000000959	GL193733.1	+	35145	36426	387	731	391	768	574	730	708	1184	1513	810	1258	1672	1389	2561	1767	2929	1832	1927	2600	2291	2347	1192	2001	1910	1756	1682	110.798	65.8515	120.335	88.5224	106.48	98.1093	151.408	210.255	131.422	152.017	315.306	266.889	487.112	302.371	435.211	291.928	378.668	488.522	405.417
ENSAMEG00000000960	GL193035.1	+	755287	793067	3414	127	33	54	82	53	249	399	88	320	254	3138	1900	3021	2248	3375	1360	1000	1398	1099	1732	145	76	231	178	122	2.18205	0.630015	0.959119	1.43352	0.876329	3.91132	5.78386	1.38624	5.88547	3.47932	67.0805	41.3837	65.1355	43.6061	56.8463	24.5661	22.2754	29.776	22.0456
ENSAMEG00000000961	GL192667.1	-	805801	827161	1332	76	19	50	54	73	79	59	21	60	53	442	219	171	346	521	203	91	223	73	264	121	25	93	68	128	3.34682	0.929714	2.27619	2.41959	3.09367	3.18061	2.19208	0.847878	2.8284	1.86078	24.2173	12.2258	9.44979	17.2023	22.4918	9.39837	5.19548	12.1737	3.75324
ENSAMEG00000000962	GL192388.1	-	2837204	2870596	1191	465	214	207	304	269	1495	2860	250	2184	1761	4906	3648	5033	4137	6195	3871	2551	2098	3083	4668	693	488	1174	1051	846	22.9015	11.7112	10.539	15.234	12.7496	67.3158	118.84	11.2888	115.142	69.1467	300.623	227.762	311.061	230.032	299.103	200.434	162.887	128.09	177.276
ENSAMEG00000000963	GL192386.1	-	1898209	1910533	546	696	353	644	499	797	509	498	1272	345	749	477	369	781	553	987	584	271	579	373	716	546	534	674	375	811	74.7722	42.1388	71.5213	54.5456	82.3988	49.9934	45.1383	125.289	39.6754	64.1524	63.7577	50.2542	105.29	67.0729	103.948	65.9601	37.7455	77.1095	46.7847
ENSAMEG00000000964	GL193733.1	+	38285	82259	1140	62	77	69	69	67	55	85	13	82	114	265	202	162	239	301	148	232	172	232	264	75	47	192	94	168	3.19015	4.40237	3.67017	3.6124	3.31761	2.58729	3.68997	0.613277	4.51651	4.67653	16.9648	13.1761	10.4602	13.8838	15.1829	8.00604	15.4764	10.971	13.937
ENSAMEG00000000965	GL193660.1	+	258205	447356	2751	17	19	14	31	23	30	55	1	60	29	150	233	127	212	151	212	219	143	245	217	62	26	76	134	70	0.362478	0.450156	0.308588	0.672548	0.471946	0.584815	0.98942	0.0195491	1.36948	0.492982	3.97931	6.29802	3.39816	5.1034	3.1563	4.75232	6.05399	3.77979	6.09906
ENSAMEG00000000966	GL192402.1	-	2976128	2981650	1744	3663	3929	4013	5077	4573	2574	6390	3582	4640	4934	8546	7639	7316	9593	10504	4859	5857	8267	5443	6562	5466	7247	9890	7863	7811	123.201	146.837	139.529	173.745	148.016	79.1498	181.327	110.458	167.057	132.305	357.621	325.708	308.786	364.269	346.338	171.815	255.398	344.686	213.737
ENSAMEG00000000967	GL193090.1	-	795600	831293	1179	146	85	162	161	100	1	7	2	8	21	31	12	16	33	47	210	148	262	192	216	43	31	90	22	38	7.26378	4.699	8.33189	8.15012	4.78786	0.0454856	0.293828	0.0912293	0.42606	0.83297	1.91891	0.756844	0.998933	1.85359	2.29232	10.9841	9.54632	16.1588	11.1526
ENSAMEG00000000968	GL192453.1	+	1081686	1094619	654	263	178	350	291	297	378	408	154	374	498	515	404	510	638	810	690	604	631	665	1076	527	334	782	498	690	23.5886	17.7395	32.4513	26.5563	25.635	30.9957	30.8739	12.6637	35.9078	35.6103	57.4694	45.9349	57.4014	64.6037	71.2195	65.0627	70.234	70.1574	69.6356
ENSAMEG00000000969	GL193449.1	-	224511	250332	1866	2	2	1	5	4	2543	356	259	283	6479	0	2	7	11	0	862	742	1084	789	1928	1427	985	1837	312	3134	0.0628698	0.0698584	0.032496	0.159923	0.121005	73.084	9.44163	7.4646	9.5229	162.375	0	0.0796998	0.276132	0.390387	0	28.4876	30.2399	42.2415	28.957
ENSAMEG00000000971	GL192386.1	+	1948339	2017981	983	2046	1836	1358	2208	1542	637	778	109	567	423	766	1060	725	1373	1116	1470	1264	802	1596	1347	779	718	1065	1283	782	122.089	121.736	83.77	134.06	88.5494	34.7515	39.1683	5.96336	36.218	20.1238	56.8699	80.1847	54.2894	92.4978	65.2833	92.2199	97.7871	59.3257	111.19
ENSAMEG00000000972	GL193683.1	-	409081	410352	357	0	0	0	0	0	0	0	1	0	0	2	0	0	0	0	714	325	821	7	1577	8	5	3	2	0	0	0	0	0	0	0	0	0.150643	0	0	0.408855	0	0	0	0	123.336	69.2314	167.223	1.34282
ENSAMEG00000000973	GL193606.1	+	412287	462136	2680	0	1	0	1	0	0	4	13	0	2	12	9	10	29	22	16	32	98	6	37	3	8	9	3	5	0	0.0243201	0	0.0222699	0	0	0.0738642	0.260872	0	0.0348995	0.326779	0.249716	0.27466	0.716601	0.472041	0.368168	0.908036	2.65897	0.153322
ENSAMEG00000000974	GL193683.1	-	424753	464024	4083	309	289	156	421	221	973	884	12	643	484	5581	4245	2256	2248	4506	3445	3492	2708	3645	1705	1103	992	664	763	604	4.44027	4.6145	2.31736	6.15547	3.05615	12.7829	10.7174	0.158098	9.89082	5.54493	99.7806	77.3292	40.6814	36.4702	63.476	52.0448	65.0563	48.2389	61.1522
ENSAMEG00000000975	GL193448.1	+	166203	199642	2733	5	1	6	0	6	11	2	0	2	19	55	11	88	19	97	20	11	43	5	47	3	4	14	2	8	0.107313	0.0238485	0.133123	0	0.123927	0.215844	0.0362159	0	0.0459499	0.325115	1.46869	0.29929	2.37014	0.460393	2.04091	0.451285	0.306084	1.14407	0.12529
ENSAMEG00000000976	GL193880.1	+	9379	32417	1074	374	288	283	352	341	408	711	601	433	412	827	958	818	1491	840	983	1389	1779	1419	1150	678	700	903	465	710	20.4264	17.4779	15.9781	19.561	17.9228	20.3725	32.7623	30.0946	25.315	17.9398	56.1964	66.3285	56.0634	91.9364	44.9745	56.443	98.3527	120.446	90.4827
ENSAMEG00000000977	GL192583.1	-	624287	626624	423	0	0	0	0	0	11	6	1	4	8	10	4	0	6	8	2	0	0	0	7	6	3	3	0	5	0	0	0	0	0	1.39457	0.701972	0.127139	0.593764	0.88445	1.72531	0.703167	0	0.939345	1.08753	0.291575	0	0	0
ENSAMEG00000000978	GL192667.1	+	842549	844048	237	560	251	262	393	285	260	406	99	239	183	1767	2111	1425	2233	1693	1458	1003	1613	1175	1168	493	498	560	841	360	138.6	69.028	67.034	98.9683	67.8815	58.8319	84.7786	22.4649	63.3204	36.1099	544.121	662.337	442.585	623.957	410.771	379.376	321.841	494.889	339.529
ENSAMEG00000000979	GL192667.1	-	848304	849352	999	20	7	6	15	24	4	1	0	0	2	57	23	21	21	36	40	47	74	2	27	14	12	13	3	14	1.17432	0.456702	0.36419	0.896144	1.35613	0.214725	0.0495385	0	0	0.0936242	4.16405	1.71199	1.54733	1.39209	2.07219	2.46919	3.57784	5.38627	0.137105
ENSAMEG00000000980	GL192667.1	-	850261	856991	1068	11	7	8	1	12	2	1	0	0	2	37	17	24	15	53	105	102	206	9	109	14	32	34	2	18	0.60415	0.427196	0.454214	0.0558831	0.634257	0.100426	0.046338	0	0	0.0875755	2.52835	1.18363	1.65413	0.93011	2.85362	6.06288	7.26302	14.0255	0.57711
ENSAMEG00000000981	GL192386.1	+	2071086	2077414	1008	1	2	0	2	0	3	1	4	1	4	0	0	1	0	0	3	7	13	1	6	2	0	0	0	0	0.058192	0.129321	0	0.118419	0	0.159606	0.0490962	0.213411	0.0622922	0.185577	0	0	0.0730247	0	0	0.183536	0.528112	0.937789	0.0679402
ENSAMEG00000000982	GL192583.1	-	630757	633877	405	0	0	0	0	0	433	212	351	226	579	11	3	2	6	14	11	3	6	2	46	86	101	66	20	138	0	0	0	0	0	57.3351	25.9054	46.6091	35.0387	66.857	1.98219	0.550814	0.363501	0.981094	1.98776	1.67494	0.563319	1.07725	0.338191
ENSAMEG00000000983	GL192453.1	-	1098825	1172441	6990	199	245	298	295	324	184	374	51	339	140	1723	1546	1638	2134	1966	842	1665	1687	1407	1274	218	175	406	398	302	1.66993	2.28449	2.58512	2.51882	2.61651	1.41165	2.64791	0.392384	3.04521	0.936644	17.9893	16.4464	17.2491	20.2177	16.1733	7.42841	18.1145	17.5493	13.7849
ENSAMEG00000000984	GL192794.1	+	1039594	1041402	675	15	4	7	11	4	5	6	2	4	6	46	41	45	29	35	10	36	20	35	14	5	11	6	24	5	1.32112	0.391459	0.637332	0.985759	0.339032	0.402609	0.445847	0.161501	0.377121	0.421309	5.0407	4.57771	4.97357	2.88362	3.02194	0.925948	4.11071	2.18362	3.599
ENSAMEG00000000985	GL195433.1	-	4172	15046	1257	89	27	54	26	122	3	2	2	3	8	108	33	58	40	130	70	25	59	27	95	113	42	160	43	193	4.15316	1.4	2.60496	1.2345	5.47872	0.127989	0.0787414	0.0855683	0.149858	0.297631	6.2704	1.95217	3.39643	2.10736	5.94702	3.43418	1.51249	3.41302	1.47101
ENSAMEG00000000986	GL192583.1	-	651185	689526	3528	302	217	264	204	305	471	696	39	594	190	200	152	42	170	150	986	389	452	436	827	1233	600	820	143	802	5.02114	4.00896	4.53751	3.45107	4.88007	7.15946	9.76314	0.594503	10.5719	2.51854	4.13722	3.20372	0.876296	3.19106	2.44486	17.2349	8.38512	9.31605	8.46341
ENSAMEG00000000987	GL192911.1	-	380672	387510	1722	562	109	253	199	281	194	99	7	105	153	1107	895	684	731	1132	1953	1153	944	1330	1453	481	348	440	232	329	19.1437	4.12566	8.90901	6.89719	9.21145	6.04166	2.84519	0.218617	3.82869	4.1551	46.9161	38.6482	29.2384	28.1124	37.8011	69.9407	50.9195	39.8622	52.8939
ENSAMEG00000000988	GL192386.1	-	2083407	2088782	1467	637	656	450	576	443	7	10	0	6	2	5	2	5	4	6	4	9	1	12	11	57	39	51	10	40	25.4702	29.1457	18.6005	23.4339	17.0462	0.255891	0.337348	0	0.256812	0.0637564	0.248741	0.101377	0.250882	0.180569	0.235187	0.168148	0.466552	0.0495669	0.560194
ENSAMEG00000000990	GL193090.1	+	875644	884807	1071	617	286	514	383	557	844	811	139	558	791	536	402	460	429	873	670	284	552	377	706	560	314	729	368	628	33.7924	17.4051	29.1015	21.3433	29.3576	42.2611	37.4749	6.97981	32.7144	34.5391	36.5243	27.911	31.6154	26.5266	46.8723	38.5786	20.1659	37.4776	24.1068
ENSAMEG00000000991	GL193080.1	+	114928	121888	1791	147	558	135	458	73	137	517	74	393	58	765	1250	772	940	576	1269	2051	347	1645	416	425	521	334	526	309	4.81444	20.3067	4.57068	15.2624	2.30082	4.10216	14.2858	2.22205	13.7782	1.51445	31.1726	51.8983	31.7287	34.7573	18.4935	43.6945	87.088	14.0882	62.901
ENSAMEG00000000992	GL192841.1	-	798690	801962	1101	1	0	0	0	0	0	0	0	0	0	0	0	0	0	0	0	0	0	0	0	0	0	0	0	0	0.0532766	0	0	0	0	0	0	0	0	0	0	0	0	0	0	0	0	0	0
ENSAMEG00000000993	GL192794.1	-	1041549	1042711	378	705	438	740	528	721	366	691	1126	428	455	491	514	616	547	655	508	547	689	694	530	592	1141	650	583	657	109.401	75.5236	118.709	83.367	107.671	51.9251	90.468	160.201	71.0962	56.2916	94.7975	101.114	119.955	95.8318	99.6417	82.8768	110.048	132.541	125.735
ENSAMEG00000000994	GL192402.1	-	3020209	3048732	1896	0	0	6	26	23	64246	84327	17127	62268	67742	0	4	2	20	0	356	457	493	633	360	3131	5940	7410	809	3581	0	0	0.191891	0.818441	0.68477	1817.17	2201.09	485.804	2062.15	1670.87	0	0.156877	0.0776465	0.698564	0	11.579	18.3301	18.9074	22.864
ENSAMEG00000000995	GL193733.1	+	96347	107177	375	329	247	470	272	428	347	361	556	245	589	498	315	534	631	806	475	344	569	383	563	402	282	603	270	554	51.4622	42.9305	75.9992	43.2902	64.4269	49.6233	47.6414	79.7374	41.0232	73.4527	96.9181	62.4623	104.819	111.433	123.593	78.113	69.7614	110.332	69.9447
ENSAMEG00000000996	GL193080.1	-	131058	150634	519	172	121	253	176	173	184	310	265	194	184	545	520	512	625	743	684	425	678	504	694	285	252	403	435	260	19.4395	15.1956	29.5594	20.2394	18.8163	19.0125	29.5599	27.4598	23.4708	16.5796	76.6366	74.5032	72.6161	79.7493	82.3215	81.2736	62.2744	94.9914	66.5044
ENSAMEG00000000998	GL195261.1	-	42852	43848	948	0	0	0	0	0	0	0	0	0	0	0	0	0	0	0	0	0	0	0	0	0	0	0	0	0	0	0	0	0	0	0	0	0	0	0	0	0	0	0	0	0	0	0	0
ENSAMEG00000000999	GL192841.1	-	831472	921042	1758	116	35	90	60	147	142	130	134	147	286	892	363	1459	550	1274	2532	167	1240	227	3682	760	223	2203	302	1210	3.87046	1.29763	3.10432	2.03697	4.72012	4.33169	3.6596	4.09925	5.25041	7.60801	37.0299	15.3542	61.0895	20.7185	41.6718	88.819	7.22413	51.2891	8.84289
ENSAMEG00000001000	GL193449.1	-	295084	347953	2187	130	148	97	137	144	0	1	0	6	5	51	91	99	92	50	7	13	19	15	12	13	6	34	8	9	3.48673	4.41076	2.68946	3.73873	3.7168	0	0.0226287	0	0.172265	0.106917	1.70188	3.09408	3.33209	2.78582	1.31466	0.197383	0.452046	0.631723	0.46971
ENSAMEG00000001001	GL195625.1	-	2946	6113	894	74	66	91	87	72	64	48	21	31	50	78	76	95	132	101	179	179	128	219	153	56	34	81	90	59	4.85532	4.81179	6.17229	5.8081	4.54621	3.83911	2.65713	1.26328	2.1773	2.61551	6.36743	6.32143	7.82197	9.77802	6.49644	12.3474	15.2266	10.4111	16.7762
ENSAMEG00000001002	GL192819.1	-	802686	803842	396	356	302	383	422	227	240	545	266	464	163	649	907	597	926	714	757	674	654	862	636	417	930	297	758	316	52.7325	49.7064	58.647	63.6018	32.3583	32.5015	68.1099	36.1247	73.5728	19.2493	119.607	170.314	110.971	154.857	103.68	117.886	129.435	120.089	149.073
ENSAMEG00000001003	GL192810.1	+	949573	972689	5829	9	0	1	0	1	3	0	0	0	2	6	0	14	5	3	28	0	0	0	40	4	0	1	0	1	0.0905674	0	0.0104027	0	0.00968414	0.0276004	0	0	0	0.0160457	0.0751215	0	0.176793	0.0568055	0.029595	0.296227	0	0	0
ENSAMEG00000001004	GL192911.1	+	455502	462900	714	1765	1975	2000	2985	1672	9623	12782	1069	9873	10101	4152	6293	5411	10566	6849	9775	8536	8796	9512	11199	12378	13134	16001	7305	18310	145.001	180.289	169.853	249.516	132.188	722.77	885.95	80.5189	868.251	661.591	424.391	655.388	557.84	980.001	551.595	844.266	909.168	895.796	912.349
ENSAMEG00000001005	GL196229.1	+	5830	7037	660	0	0	0	0	0	0	0	0	0	0	0	0	0	0	0	0	0	0	0	0	0	0	1	0	0	0	0	0	0	0	0	0	0	0	0	0	0	0	0	0	0	0	0	0
ENSAMEG00000001006	GL192819.1	-	810284	814264	690	3	2	3	0	2	0	2	0	2	0	6	0	7	4	2	9	8	14	9	6	5	3	15	2	2	0.255033	0.188921	0.263642	0	0.16362	0	0.143446	0	0.182002	0	0.634613	0	0.746757	0.383906	0.166676	0.804367	0.881717	1.47537	0.893266
ENSAMEG00000001007	GL194826.1	-	53698	123084	2724	296	174	224	206	253	300	383	20	298	224	595	523	393	471	624	575	413	423	475	646	342	183	410	264	293	6.37394	4.16334	4.98635	4.51349	5.24286	5.90612	6.95825	0.394858	6.86916	3.8456	15.941	14.2769	10.6198	11.4506	13.1725	13.0173	11.53	11.2916	11.9419
ENSAMEG00000001008	GL192794.1	+	1043377	1051243	750	766	459	648	644	728	480	593	671	401	518	936	910	951	872	1496	1331	707	984	980	1326	689	918	661	475	809	59.9089	39.8889	52.3909	51.248	54.793	34.3216	39.1293	48.1149	33.572	32.2992	91.0797	90.2234	93.3361	76.9962	114.7	109.44	71.688	95.4017	89.4854
ENSAMEG00000001009	GL193080.1	-	159990	169084	1194	206	69	221	87	160	191	125	52	113	143	619	573	501	566	651	413	635	614	657	447	340	158	383	184	275	10.1201	3.76656	11.2235	4.34878	7.56433	8.57861	5.18101	2.34216	5.94249	5.60087	37.835	35.6853	30.8861	31.3925	31.3522	21.3308	40.4443	37.3926	37.6833
ENSAMEG00000001010	GL193733.1	-	113959	160237	843	11	4	21	10	7	9	14	3	19	19	217	105	406	191	330	81	80	178	116	127	6	20	28	16	11	0.765401	0.309266	1.51055	0.707986	0.468733	0.572536	0.821881	0.191387	1.41521	1.05402	18.7862	9.26191	35.451	15.0045	22.5101	5.92541	7.2169	15.3538	9.42362
ENSAMEG00000001012	GL193813.1	+	69053	411751	2637	64	37	58	52	37	29	52	9	52	52	628	529	496	731	898	439	221	490	267	534	598	121	618	193	871	1.45001	0.931472	1.35843	1.19874	0.806723	0.600695	0.993985	0.186951	1.26115	0.93928	17.7025	15.1937	14.102	18.6982	19.9451	10.4567	6.49155	13.7621	7.06263
ENSAMEG00000001013	GL192402.1	-	3051360	3060574	1608	1	0	2	21	24	34709	81656	4676	84492	29617	1	0	3	19	0	23	21	19	41	48	271	381	366	62	303	0.0364786	0	0.0754199	0.779445	0.84252	1157.56	2513.11	156.389	3299.32	861.348	0.0453859	0	0.13733	0.782496	0	0.882069	0.993165	0.859191	1.74617
ENSAMEG00000001014	GL192841.1	-	931807	982104	1440	75	73	71	92	101	26	192	18	166	48	197	141	153	205	319	362	123	150	179	627	302	110	835	141	399	3.05508	3.30416	2.98977	3.81309	3.95926	0.968275	6.59853	0.672246	7.23836	1.55884	9.98414	7.28108	7.82094	9.4277	12.7385	15.5027	6.49577	7.57445	8.51291
ENSAMEG00000001015	GL193880.1	-	35087	95643	7398	360	234	236	377	402	1059	784	37	755	1081	876	769	686	941	1142	731	780	725	699	1040	492	252	606	450	639	3.37328	2.43636	2.28602	3.59434	3.62499	9.07213	6.19798	0.317867	7.57298	8.0756	10.2126	9.13463	8.06641	9.95473	10.4902	7.20118	9.47564	8.42143	7.64699
ENSAMEG00000001016	GL193448.1	+	237772	386416	5820	3	4	1	0	0	0	1	0	0	0	8	5	4	3	3	3	0	3	1	9	45	45	53	4	69	0.0302358	0.0447958	0.0104188	0	0	0	0.00850326	0	0	0	0.100317	0.0638831	0.0505903	0.034136	0.0296408	0.0317877	0	0.0374818	0.011767
ENSAMEG00000001017	GL192819.1	+	821342	823808	630	932	338	365	351	605	19	108	32	58	32	391	362	447	455	470	1274	665	1100	758	1084	309	656	318	755	230	86.7759	34.9684	35.1313	33.2521	54.2088	1.61734	8.48383	2.73167	5.78072	2.37538	45.2943	42.7274	52.2273	47.8283	42.8992	124.707	80.2729	126.962	82.3979
ENSAMEG00000001018	GL193090.1	+	892036	916210	2259	719	403	646	706	738	2227	2565	116	1693	2503	1840	1330	1728	1976	2463	1809	1072	1707	1267	2037	1314	897	1972	1223	1564	18.6697	11.6276	17.3404	18.6527	18.4415	52.8679	56.1927	2.7616	47.0582	51.8165	59.4441	43.7799	56.3064	57.9275	62.696	49.3836	36.0883	54.9464	38.4103
ENSAMEG00000001019	GL193080.1	+	170437	176755	840	3	1	2	1	1	4	1	0	0	5	29	7	15	5	23	46	42	97	2	42	21	7	37	2	15	0.209491	0.0775927	0.144375	0.0710514	0.067201	0.255369	0.0589155	0	0	0.278365	2.51957	0.619666	1.31444	0.394189	1.57449	3.37706	3.8024	8.39681	0.163057
ENSAMEG00000001020	GL192819.1	+	862559	864810	633	3279	1734	2770	2556	2823	2800	3527	6116	3310	3017	2647	2601	3445	2729	3953	4864	2659	5030	4184	4895	4787	9469	6700	5701	5328	303.851	178.544	265.349	240.996	251.746	237.215	275.747	519.616	328.336	222.892	305.181	305.545	400.604	285.505	359.099	473.861	319.45	577.812	452.663
ENSAMEG00000001021	GL192794.1	-	1046176	1107810	1461	34	42	32	58	49	28	73	14	71	66	98	65	73	93	126	81	124	109	109	132	52	38	96	56	88	2.24843	3.08621	2.1876	3.90262	3.11837	1.69286	4.07294	0.848834	5.02608	3.47972	8.06324	5.44915	6.058	6.94342	8.16843	5.63148	10.6313	8.93563	8.4157
ENSAMEG00000001022	GL192911.1	-	481582	493331	3990	604	234	266	191	214	133	238	11	113	52	1015	944	431	485	535	2265	905	631	1018	980	1038	947	455	269	429	8.87948	3.82246	4.04251	2.85702	3.02758	1.78758	2.95198	0.148265	1.77828	0.609472	18.5652	17.5929	7.95124	8.04976	7.71032	35.0071	17.249	11.4995	17.4728
ENSAMEG00000001023	GL192388.1	-	3045468	3048839	582	120	44	140	47	129	82	26	26	48	106	194	170	161	216	274	106	105	207	128	157	115	38	237	77	208	12.7516	5.19534	15.3791	5.08172	13.1918	7.96641	2.331	2.5331	5.46005	8.98029	25.649	22.9007	21.4693	25.9137	28.5432	11.8421	14.4657	27.268	15.8803
ENSAMEG00000001024	GL192794.1	+	1068423	1075108	813	8067	5783	3991	5740	3523	846	2008	374	1321	639	3587	5597	3002	5714	3834	6782	5381	3321	6005	4603	4662	8165	3854	3932	4184	582.03	463.621	297.669	421.38	244.612	55.8043	122.231	24.74	102.025	36.7565	321.994	511.922	271.801	465.44	271.177	514.432	503.339	297.03	505.836
ENSAMEG00000001025	GL192911.1	-	526213	530271	831	38	16	28	29	44	90	43	11	41	74	63	54	43	58	83	64	45	70	55	80	41	12	39	12	38	2.68229	1.25493	2.04315	2.08281	2.98887	5.80804	2.5608	0.711885	3.09797	4.16442	5.53282	4.83205	3.80888	4.62212	5.7434	4.74941	4.11813	6.12518	4.53262
ENSAMEG00000001027	GL192388.1	+	3076879	3088037	516	60	42	57	69	62	28	37	10	25	51	131	67	92	96	135	125	119	142	164	188	72	82	117	62	74	6.82064	5.30518	6.69834	7.98089	6.78261	2.91002	3.54863	1.04224	3.04218	4.62215	18.528	9.65526	13.1241	12.3207	15.0444	14.939	17.5382	20.0106	21.7662
ENSAMEG00000001028	GL193300.1	+	53734	72334	2091	40	3	4	1	13	231	30	2	21	116	122	19	24	8	99	209	27	42	11	108	45	10	24	6	20	1.12209	0.093512	0.115997	0.0285429	0.350949	5.92442	0.710029	0.0514392	0.630608	2.59434	4.25807	0.675676	0.844865	0.253367	2.72253	6.16386	0.981969	1.46055	0.360268
ENSAMEG00000001029	GL193733.1	+	275135	279418	3543	110	30	3	2	6	2	0	0	0	0	7	17	2	18	1	68	6	2	7	58	1	4	11	0	0	1.82115	0.551887	0.0513443	0.0336908	0.095595	0.0302724	0	0	0	0	0.14419	0.356793	0.0415517	0.336446	0.0162301	1.18358	0.128786	0.041047	0.135305
ENSAMEG00000001030	GL192911.1	-	549131	575289	948	1	5	0	4	2	7	4	0	2	1	6	3	5	6	15	54	8	6	6	50	10	0	4	1	16	0.061875	0.343765	0	0.251828	0.11909	0.395984	0.208814	0	0.13247	0.0493305	0.461902	0.235316	0.388233	0.419138	0.90986	3.51274	0.641756	0.46022	0.433441
ENSAMEG00000001031	GL192388.1	+	3128127	3191746	1722	271	216	311	223	344	134	112	129	83	235	599	346	496	479	753	487	209	565	240	732	490	257	915	233	722	14.0924	12.4809	16.7184	11.7991	17.2149	6.37065	4.9138	6.15034	4.62023	9.74277	38.7547	22.809	32.367	28.1216	38.3864	26.6245	14.0905	36.4218	14.571
ENSAMEG00000001032	GL193080.1	-	178596	202099	2193	737	432	555	509	561	911	786	173	486	837	930	825	714	745	975	845	506	772	499	736	645	572	681	441	674	19.713	12.8394	15.346	13.8526	14.4404	22.2776	17.7375	4.24254	13.9153	17.8489	30.9493	27.974	23.9657	22.4974	25.5657	23.7618	17.5469	25.5977	15.5829
ENSAMEG00000001033	GL193733.1	-	306495	349971	2685	1	0	0	0	5	3708	1944	164	1183	5366	11	1	15	1	11	7	1	7	0	15	640	368	1056	113	973	0.0218464	0	0	0	0.105119	74.0599	35.8311	3.28487	27.6653	93.4609	0.298989	0.0276946	0.411223	0.0246644	0.235581	0.160774	0.0283233	0.189573	0
ENSAMEG00000001034	GL192373.1	-	3131337	3229767	3843	4	10	6	66	9	248	88	5	74	154	42	14	19	14	47	37	50	18	30	18	414	296	151	356	588	0.0610539	0.169602	0.0946723	1.025	0.132199	3.46074	1.13324	0.069971	1.20908	1.87402	0.797601	0.270892	0.363926	0.241253	0.703265	0.593734	0.989436	0.340584	0.534612
ENSAMEG00000001035	GL192841.1	+	1006086	1061997	2781	6	0	4	1	1	9	2	0	1	6	39	18	108	29	84	84	15	93	20	192	14	6	82	6	15	0.127148	0	0.0876266	0.0215619	0.0203934	0.174367	0.0357579	0	0.0226845	0.10137	1.02827	0.483554	2.87202	0.693819	1.74504	1.87143	0.41211	2.44309	0.494825
ENSAMEG00000001036	GL192402.1	-	3063829	3076563	1158	0	0	4	8	3	41306	20072	15185	21225	42722	0	0	2	2	0	0	0	10	1	3	0	10	11	6	3	0	0	0.209456	0.412319	0.14624	1912.9	857.809	705.22	1150.89	1725.31	0	0	0.127131	0.114376	0	0	0	0.627933	0.0591397
ENSAMEG00000001037	GL192388.1	+	3259820	3264379	330	21	18	16	21	26	9	8	14	10	25	72	42	57	57	86	62	42	58	37	82	54	12	54	20	62	3.73275	3.55516	2.94001	3.79802	4.44748	1.46257	1.19973	2.28156	1.90274	3.54283	15.923	9.46399	12.7143	11.4387	14.9857	11.5861	9.67884	12.7802	7.67848
ENSAMEG00000001038	GL193373.1	-	267832	278377	1050	0	0	0	0	0	0	0	0	0	0	1	0	0	0	0	0	0	0	0	0	0	0	0	0	0	0	0	0	0	0	0	0	0	0	0	0.0695053	0	0	0	0	0	0	0	0
ENSAMEG00000001040	GL192992.1	+	197203	228515	972	20	14	25	24	13	65	161	115	96	70	1029	836	802	859	1022	410	420	390	459	384	56	67	84	236	47	1.20694	0.938776	1.55961	1.47366	0.754974	3.5862	8.19725	6.36282	6.20154	3.36787	77.2603	63.9557	60.7349	58.525	60.4611	26.0123	32.8603	29.1756	32.3395
ENSAMEG00000001041	GL192402.1	-	3114222	3121319	1086	1	0	0	22	14	304742	74829	18742	58855	280970	0	2	2	13	0	0	2	27	6	15	2	20	4	13	16	0.0540124	0	0	1.20905	0.727701	15048.4	3409.96	928.121	3402.89	12099.1	0	0.136943	0.13556	0.792735	0	0	0.140052	1.80782	0.378363
ENSAMEG00000001042	GL192386.1	+	2083792	2086368	321	1	1	0	0	0	0	0	0	0	0	0	0	0	0	2	0	0	0	1	0	0	0	0	0	0	0.182734	0.203046	0	0	0	0	0	0	0	0	0	0	0	0	0.358275	0	0	0	0.213345
ENSAMEG00000001043	GL193373.1	+	296142	322408	1413	29	11	7	11	8	11	9	2	13	11	191	177	135	229	192	264	69	85	68	183	202	325	418	68	230	1.20387	0.5074	0.300399	0.464625	0.319597	0.417483	0.315217	0.0761213	0.577691	0.364061	9.86503	9.31473	7.0327	10.7327	7.81359	11.5219	3.7136	4.3742	3.29575
ENSAMEG00000001044	GL192386.1	+	2114848	2119144	282	3	2	1	6	2	0	0	0	0	0	0	0	0	0	0	0	0	0	1	0	1	0	0	0	0	0.624016	0.462254	0.215027	1.26986	0.400346	0	0	0	0	0	0	0	0	0	0	0	0	0	0.24285
ENSAMEG00000001045	GL192453.1	+	1204318	1285742	5049	3	0	3	3	9	26792	13358	845	8159	43567	0	8	15	34	10	6852	1750	2865	2392	10066	175	65	416	13	251	0.0348529	0	0.0360295	0.0354624	0.100622	284.569	130.932	9.00056	101.467	403.53	0	0.117821	0.218684	0.445952	0.11389	83.6899	26.3585	41.2612	32.4447
ENSAMEG00000001046	GL192583.1	-	807221	812504	2103	91	103	102	169	67	391	286	37	249	291	407	676	422	923	518	364	689	432	829	399	308	272	339	755	314	2.5382	3.19226	2.94105	4.79623	1.79842	9.97069	6.73032	0.946195	7.43455	6.47109	14.1241	23.9027	14.7708	29.0654	14.1639	10.6739	24.9154	14.9371	26.9962
ENSAMEG00000001047	GL192386.1	+	2164168	2170029	498	14995	9204	13764	11876	15372	16814	28334	23038	17452	24738	16432	15534	22911	17032	31104	16767	8189	20169	12133	16113	15709	28418	19449	38107	20638	1766.2	1204.61	1675.94	1423.29	1742.43	1810.63	2815.71	2487.9	2200.44	2323.05	2408.06	2319.49	3386.45	2264.91	3591.52	2076.28	1250.52	2944.94	1668.5
ENSAMEG00000001048	GL192583.1	-	823807	897507	5556	507	236	330	250	366	180	174	35	110	159	1125	886	1045	778	1011	1505	934	1146	1191	1363	404	184	263	294	298	5.65925	2.92711	3.80788	2.83935	3.93155	1.83691	1.63865	0.35819	1.31436	1.41497	15.6238	12.5372	14.6377	9.8044	11.0629	17.6614	13.5164	15.8575	15.5212
ENSAMEG00000001049	GL192819.1	+	878921	884078	1398	5024	4096	3101	3962	4015	2458	2084	2221	1502	1660	1016	983	1035	855	1134	1177	703	793	703	879	3372	5375	2446	2951	3096	210.798	190.965	134.504	169.145	162.119	94.2893	73.7733	85.4397	67.4617	55.5296	53.0388	52.286	54.4959	40.5017	46.6442	51.9195	38.2416	41.2466	34.4378
ENSAMEG00000001050	GL193035.1	+	799934	824939	1608	53	12	23	26	23	4	15	1	22	10	232	483	419	427	248	554	165	176	216	673	104	80	37	486	24	1.93336	0.486402	0.867329	0.965027	0.807415	0.133402	0.461651	0.0334451	0.859075	0.290829	10.5295	22.3357	19.1804	17.5856	8.86865	21.2464	7.80344	7.95882	9.19931
ENSAMEG00000001051	GL192794.1	-	1076440	1078018	243	15323	12316	19291	13677	17834	912	1498	3942	1006	2112	378	440	645	558	1032	403	424	546	660	560	4079	8324	5359	4236	7696	3698.8	3303.42	4813.83	3359.21	4142.83	201.269	305.08	872.426	259.948	406.454	113.525	134.643	195.382	152.07	244.211	102.273	132.693	163.384	186.005
ENSAMEG00000001052	GL192386.1	+	2187578	2310901	516	677	433	763	428	728	268	258	174	187	320	489	370	476	506	802	837	338	755	496	763	607	585	734	418	822	81.2089	57.7137	94.6145	52.2381	84.0383	29.391	26.1108	19.1363	24.0119	30.6031	72.9805	56.2642	71.652	68.5261	94.3099	105.555	52.5649	112.269	69.4641
ENSAMEG00000001053	GL194786.1	-	13577	34899	1971	119	11	35	10	46	178	182	50	80	117	1295	824	1019	523	899	616	131	302	124	472	110	33	152	38	73	3.54147	0.363753	1.07677	0.302807	1.31743	4.84308	4.56976	1.36427	2.54858	2.77602	47.9502	31.0871	38.0555	17.5723	26.228	19.2732	5.05444	11.1415	4.30846
ENSAMEG00000001054	GL192794.1	+	1150608	1152227	906	294	205	425	354	388	237	194	97	185	595	554	379	696	768	1200	498	468	808	530	861	326	205	723	464	620	19.0346	14.7478	28.4448	23.3199	24.1746	14.0284	10.597	5.75787	12.8215	30.7123	44.6261	31.1064	56.5472	56.1368	76.1631	33.8971	39.2831	64.8493	40.0622
ENSAMEG00000001055	GL192794.1	-	1316938	1400286	3003	102	49	166	49	194	28	21	13	19	71	199	76	230	164	363	164	74	267	95	315	158	82	295	71	276	1.99236	1.06351	3.35193	0.973852	3.64671	0.500024	0.346077	0.232813	0.397276	1.10567	4.83621	1.8819	5.63771	3.61662	6.95093	3.36782	1.87398	6.46514	2.16649
ENSAMEG00000001056	GL192667.1	-	859118	876481	1362	29	13	32	20	25	55	45	50	40	53	105	57	128	51	149	183	45	177	72	205	146	124	248	49	146	1.24895	0.622109	1.42467	0.876405	1.03614	2.16558	1.6351	1.97429	1.84407	1.81979	5.62625	3.11198	6.91772	2.47975	6.29073	8.28581	2.5126	9.44971	3.62029
ENSAMEG00000001058	GL192386.1	+	2318831	2319730	306	312	187	312	102	196	123	191	43	172	91	203	327	165	348	267	439	138	213	198	308	244	193	141	60	229	59.8077	39.8309	61.8266	19.8944	36.1568	21.5562	30.8902	7.55728	35.294	13.9073	48.4152	79.4631	39.6911	75.3134	50.1743	88.4716	34.2962	50.6151	44.313
ENSAMEG00000001059	GL193655.1	+	5542	6058	501	0	0	0	0	0	1	1	0	2	4	0	0	0	1	0	0	0	2	3	4	1	1	0	2	1	0	0	0	0	0	0.107041	0.0987804	0	0.250661	0.373376	0	0	0	0.132183	0	0	0	0.290278	0.410082
ENSAMEG00000001060	GL193502.1	-	17869	51008	7926	1672	2045	1321	1965	931	1156	3172	105	2664	539	5324	8431	3689	7621	4154	5910	6529	3589	7037	4057	2408	1814	2097	2056	1589	12.3739	16.8166	10.1063	14.7966	6.63057	7.82153	19.8056	0.712449	21.1045	3.18023	49.022	79.0977	34.2598	63.6755	30.1373	45.9827	62.6442	32.9262	60.8024
ENSAMEG00000001061	GL192386.1	-	2321571	2325673	312	215	79	114	83	52	725	700	96	413	251	374	750	405	664	357	725	314	279	301	436	624	589	575	238	365	40.421	16.5034	22.1561	15.8773	9.40814	124.615	111.033	16.5476	83.117	37.6221	87.4831	178.75	95.55	140.938	65.7969	143.299	76.5355	65.0237	66.0693
ENSAMEG00000001062	GL192992.1	-	697951	701433	1395	129	102	55	64	87	3	1	0	1	1	105	22	96	18	85	195	8	17	18	103	127	59	113	8	42	5.42424	4.76569	2.39073	2.73815	3.52046	0.115328	0.035476	0	0.0450112	0.0335235	5.49316	1.1727	5.06556	0.854501	3.50378	8.62028	0.436118	0.886129	0.883661
ENSAMEG00000001063	GL192386.1	+	2403001	2509113	2739	0	0	0	2	1	3	0	0	0	3	2	1	1	3	0	0	0	3	0	2	0	1	0	1	0	0	0	0	0.0435803	0.0206093	0.0587377	0	0	0	0.0512216	0.0532899	0.0271486	0.0268744	0.0725343	0	0	0	0.0796437	0
ENSAMEG00000001064	GL193090.1	+	921530	946738	1317	2	1	6	4	2	22	9	7	2	59	54	29	84	49	76	36	20	57	18	62	14	8	46	10	21	0.0890775	0.0494897	0.276253	0.18127	0.0857234	0.895828	0.338194	0.285845	0.0953539	2.09503	2.99237	1.63739	4.69487	2.46391	3.31833	1.68569	1.15487	3.1471	0.935996
ENSAMEG00000001065	GL192911.1	+	624203	639625	795	2	0	0	7	2	19	81	8	59	21	0	2	0	7	0	1389	173	358	264	1504	9142	1280	2125	165	5686	0.147566	0	0	0.525512	0.14201	1.28166	5.04228	0.541179	4.65993	1.23531	0	0.187069	0	0.583103	0	107.745	16.5488	32.7445	22.7418
ENSAMEG00000001066	GL193300.1	-	73746	76730	945	32	11	5	10	12	93	44	6	14	21	141	101	63	36	84	132	77	121	23	58	209	102	135	8	84	2.07408	0.792217	0.335015	0.659483	0.748493	5.5109	2.40609	0.35655	0.971346	1.08516	11.3704	8.29873	5.12415	2.63432	5.33731	8.99469	6.47039	9.72207	1.74047
ENSAMEG00000001067	GL193655.1	+	13438	16981	522	14	8	9	9	31	160	168	71	125	176	122	91	144	78	173	148	35	97	51	173	63	31	87	28	70	1.57319	0.998895	1.04548	1.02902	3.35233	16.4376	15.9275	7.31486	15.0361	15.7676	17.0568	12.9631	20.3059	9.89552	19.0576	17.4845	5.09901	13.5121	6.69094
ENSAMEG00000001068	GL193080.1	-	216437	228689	786	1	0	0	0	2	1	0	1	0	0	2	5	6	23	4	134	12	73	11	82	0	0	6	2	1	0.0746279	0	0	0	0.143636	0.0682284	0	0.068422	0	0	0.185701	0.473028	0.5619	1.93785	0.292637	10.5134	1.16104	6.7534	0.958424
ENSAMEG00000001069	GL193090.1	-	966500	971822	918	1	2	6	1	0	0	0	0	0	1	1	0	4	1	4	1	0	2	0	2	0	0	2	0	4	0.0638971	0.142	0.396324	0.0650144	0	0	0	0	0	0.0509426	0.0794995	0	0.320736	0.0721393	0.250558	0.0671766	0	0.15842	0
ENSAMEG00000001070	GL192667.1	+	881730	886322	1461	84	63	131	70	93	424	123	71	102	251	268	193	303	234	362	448	137	293	152	486	299	249	413	101	236	3.37251	2.81054	5.43705	2.85956	3.59325	15.5634	4.16642	2.61352	4.38374	8.03428	13.3873	9.82304	15.2659	10.6067	14.2479	18.9099	7.13113	14.5828	7.12493
ENSAMEG00000001071	GL192992.1	-	943027	975530	2223	1512	878	1166	934	1557	1190	1268	401	833	2006	1405	1179	1223	1256	1871	1475	1344	1573	1412	1697	1231	1129	1624	1165	1969	39.8966	25.7428	31.8054	25.0761	39.537	28.7075	28.2285	9.70115	23.5288	42.2003	46.1258	39.4379	40.4965	37.4166	48.3978	40.9179	45.9778	51.4531	43.4993
ENSAMEG00000001072	GL193853.1	+	68213	395040	2751	0	3	0	2	2	64	21	9	30	26	3	4	4	3	7	4	3	1	3	2	4	17	3	6	4	0	0.0710773	0	0.0433902	0.0410388	1.24761	0.377779	0.175942	0.684739	0.441984	0.0795862	0.108121	0.107029	0.0722179	0.146318	0.0896665	0.0829314	0.0264321	0.0746824
ENSAMEG00000001073	GL192402.1	-	3142029	3160049	1086	650	514	510	754	481	1720	1917	482	1497	1707	1245	1242	1178	1532	1723	919	766	943	999	950	796	1107	787	1279	941	35.1081	30.8485	28.4762	41.4375	25.0017	84.935	87.3577	23.8691	86.5538	73.5068	83.6655	85.0415	79.8446	93.4207	91.232	52.1851	53.6398	63.1399	62.9975
ENSAMEG00000001074	GL193300.1	-	78255	86245	1197	1019	548	239	298	286	446	441	17	157	157	656	615	295	229	387	1183	316	272	339	400	692	677	327	305	324	49.9348	29.8392	12.1073	14.8585	13.4874	19.9815	18.2328	0.763789	8.23569	6.13379	39.996	38.205	18.1409	12.6694	18.5912	60.9469	20.0762	16.5233	19.3951
ENSAMEG00000001075	GL192522.1	+	13030	289653	1239	16	19	10	27	16	15	12	0	1	9	49	55	36	75	49	108	58	71	102	101	72	40	110	53	43	1.12129	1.47955	0.724464	1.92526	1.07907	0.961067	0.70952	0	0.0750186	0.502853	4.27246	4.88626	3.16597	5.93404	3.36637	7.95718	5.26976	6.16815	8.34569
ENSAMEG00000001076	GL193733.1	+	367877	376851	1011	29	18	46	26	45	38	21	22	26	65	84	33	74	73	94	54	38	70	32	73	68	33	145	42	95	1.68256	1.16044	2.75898	1.53488	2.51256	2.01567	1.02796	1.17028	1.61479	3.00667	6.06366	2.42718	5.38779	4.78174	5.34649	3.29385	2.85838	5.03465	2.16764
ENSAMEG00000001077	GL193080.1	-	275158	279471	627	80	25	43	20	79	85	37	50	48	64	148	108	119	111	187	116	92	168	84	139	122	70	124	45	81	7.48421	2.5988	4.15856	1.90377	7.11237	7.27008	2.9204	4.28865	4.80693	4.77349	17.2267	12.8084	13.9704	11.7238	17.1501	11.4091	11.1586	19.4834	9.17486
ENSAMEG00000001078	GL192819.1	-	884724	888366	1164	0	1	0	6	2	3	0	0	1	0	7	3	9	2	5	24	22	1	24	26	1052	319	427	33	1065	0	0.0559947	0	0.307645	0.0969911	0.138215	0	0	0.0539438	0	0.438886	0.191649	0.569141	0.113787	0.247007	1.27151	1.43733	0.0624697	1.41204
ENSAMEG00000001079	GL195353.1	-	26311	40573	1350	16	17	32	42	3	40	154	175	110	23	18556	6102	14427	4687	18144	2808	3694	5769	4637	2868	13	322	154	137	10	0.6952	0.820758	1.43734	1.85681	0.125442	1.58896	5.64541	6.97144	5.11627	0.796742	1003.13	336.107	786.634	229.919	772.842	128.27	208.09	310.734	235.229
ENSAMEG00000001080	GL193655.1	+	89770	127416	2805	176	121	244	221	261	333	380	281	387	521	680	651	994	1286	1217	900	1209	1215	1208	1434	704	686	1799	588	1151	3.68047	2.81159	5.27472	4.70231	5.25246	6.36648	6.70439	5.38756	8.66308	8.68617	17.6923	17.2579	26.0846	30.3614	24.9488	19.7866	32.7779	31.4967	29.4932
ENSAMEG00000001081	GL193733.1	-	387408	403717	924	1	4	0	8	5	0	1	0	2	0	2	4	19	2	14	30	10	43	15	24	0	2	1	1	3	0.0634822	0.282155	0	0.516738	0.305459	0	0.0535595	0	0.13591	0	0.157967	0.321904	1.5136	0.143342	0.87126	2.00221	0.823031	3.38391	1.11175
ENSAMEG00000001082	GL193080.1	+	280384	293155	831	6	1	1	4	2	1	4	2	3	1	66	27	91	14	73	47	15	33	16	68	6	5	28	7	8	0.42352	0.0784331	0.0729695	0.287284	0.135858	0.0645337	0.238214	0.129434	0.226681	0.0562759	5.79629	2.41603	8.06066	1.11568	5.05142	3.48785	1.37271	2.88759	1.31858
ENSAMEG00000001083	GL192522.1	-	298527	662172	3315	1	1	4	1	0	4	0	0	5	6	0	0	1	1	0	2	0	1	1	2	0	7	1	0	1	0.0245326	0.0272597	0.101443	0.0249616	0	0.0897157	0	0	0.131306	0.117353	0	0	0.0307858	0.0276971	0	0.0515836	0	0.0304118	0.0286423
ENSAMEG00000001084	GL193655.1	-	103547	109362	405	1	0	0	0	0	0	0	0	0	0	0	0	0	1	1	0	0	1	0	0	0	0	0	0	0	0.144833	0	0	0	0	0	0	0	0	0	0	0	0	0.163516	0.141983	0	0	0.179542	0
ENSAMEG00000001085	GL193655.1	-	163596	329079	1048	40	27	18	53	25	46	78	20	79	28	187	175	88	202	214	330	133	114	172	267	75	121	100	85	64	2.23884	1.6792	1.04149	3.01833	1.34658	2.35388	3.68334	1.02633	4.73326	1.24945	13.0223	12.417	6.1809	12.7645	11.7421	19.4184	9.65114	7.9098	11.2397
ENSAMEG00000001086	GL193300.1	-	88136	91072	636	1487	913	1173	1038	1188	1816	2277	336	1558	2551	1952	2564	2423	3521	3336	2559	1921	2885	2330	2947	3216	4426	3836	1781	4716	137.144	93.5651	111.836	97.4075	105.442	153.125	177.18	28.4119	153.817	187.576	223.991	299.778	280.431	366.626	301.62	248.127	229.699	329.846	250.892
ENSAMEG00000001087	GL192911.1	+	647273	649784	813	0	0	0	0	0	0	0	2	0	0	3	0	3	0	3	10	1	3	7	2	1426	1065	1330	87	856	0	0	0	0	0	0	0	0.132299	0	0	0.269301	0	0.27162	0	0.212189	0.758526	0.09354	0.26832	0.589651
ENSAMEG00000001088	GL193502.1	+	215046	244475	2193	784	441	528	452	617	763	500	74	365	544	1099	885	894	897	1032	1015	795	936	824	1022	1441	1194	1368	488	1321	22.9823	14.3645	16.0003	13.4817	17.4058	20.4487	12.3661	1.98885	11.4536	12.7138	40.0828	32.8878	32.8867	29.6865	29.6568	31.2809	30.214	34.0135	28.2012
ENSAMEG00000001089	GL193733.1	+	169365	507735	1128	385	594	494	1616	607	2943	7519	2031	4763	2860	763	1749	1751	2101	876	4415	2155	3276	2332	4306	1354	976	1900	6500	1537	18.3305	31.425	24.3141	78.2858	27.812	128.105	302.036	88.6579	242.753	108.562	45.1982	105.565	104.618	112.935	40.887	220.994	133.022	193.355	129.63
ENSAMEG00000001090	GL193288.1	+	428825	439852	2154	419	505	137	463	233	824	341	82	180	293	615	800	325	454	451	2696	2867	1362	3471	1843	466	705	436	1454	208	11.4102	15.2808	3.85671	12.8288	6.10612	20.5149	7.83461	2.04732	5.24712	6.3613	20.8371	27.6174	11.1063	13.958	12.0399	77.1854	101.221	45.9784	110.356
ENSAMEG00000001091	GL194786.1	+	50354	66967	1011	3382	2267	1693	2027	1698	1514	1725	304	1074	860	3460	2930	2699	2470	3587	4527	2282	2236	2524	2956	4805	5586	4257	4614	3503	196.221	146.151	101.543	119.662	94.8072	80.3087	84.4397	16.1711	66.7033	39.7806	249.765	215.504	196.509	161.793	204.02	276.134	171.653	160.821	170.972
ENSAMEG00000001092	GL193655.1	+	434637	459119	1596	60	57	40	41	32	929	226	1	170	371	240	522	330	401	232	441	62	69	59	265	16	8	15	46	10	2.20517	2.32778	1.51974	1.53322	1.13181	31.2155	7.00784	0.0336966	6.68822	10.8709	10.9745	24.3207	15.2199	16.6389	8.35885	17.0399	2.95425	3.14368	2.53167
ENSAMEG00000001093	GL192911.1	-	661227	681010	1941	5	3	2	7	5	12	25	4	15	16	117	37	215	92	183	222	123	116	105	326	132	41	141	23	147	0.151101	0.100739	0.0624808	0.215241	0.145412	0.331546	0.637416	0.110829	0.485244	0.385494	4.39914	1.41747	8.15348	3.13889	5.42147	7.05323	4.81912	4.34565	3.70468
ENSAMEG00000001095	GL192522.1	+	751705	800441	1497	195	101	229	157	181	103	84	58	145	112	264	200	317	345	315	269	303	435	354	372	173	117	298	158	216	7.64076	4.39744	9.2759	6.25936	6.82514	3.6898	2.77694	2.08365	6.08192	3.49881	12.8703	9.93453	15.5872	15.262	12.0999	11.0813	15.3925	21.1295	16.1946
ENSAMEG00000001096	GL193035.1	-	828466	835540	513	686	395	689	375	731	4858	3523	4331	3034	5051	9	260	467	7	41	4	9	9	4	5	3733	3499	3308	9768	2555	78.4387	50.1857	81.4412	43.6281	80.4368	507.841	339.863	454.035	371.358	460.451	1.28036	37.6873	67.0085	0.903639	4.59577	0.480843	1.33418	1.2757	0.533986
ENSAMEG00000001097	GL192819.1	-	890489	891632	513	306	161	175	236	292	103	167	132	150	120	59	60	91	72	90	59	49	40	64	71	654	1007	507	362	855	34.9887	20.4554	20.6853	27.4566	32.1307	10.7673	16.1105	13.8381	18.3598	10.9392	8.39347	8.69707	13.0573	9.29457	10.0883	7.09244	7.26385	5.66976	8.54378
ENSAMEG00000001098	GL192819.1	-	894513	898415	1149	0	0	0	0	1	1	2	0	0	0	19	10	2	1	28	9	0	1	0	2	3	0	3	1	3	0	0	0	0	0.0491287	0.0466732	0.0861427	0	0	0	1.20681	0.647171	0.128127	0.0576361	1.4013	0.48304	0	0.0632852	0
ENSAMEG00000001099	GL192386.1	+	2600346	2742763	952	222	111	128	152	134	320	188	16	155	245	495	464	536	433	564	516	421	513	506	538	347	304	393	375	318	13.6785	7.59952	8.15296	9.52925	7.94553	18.0261	9.77304	0.90386	10.2233	12.0352	37.9468	36.2427	41.4437	30.1207	34.067	33.4252	33.6305	39.1834	36.4
ENSAMEG00000001100	GL192841.1	-	1127184	1286142	1101	0	0	0	0	0	0	0	0	0	0	0	0	2	0	0	0	0	0	0	0	0	0	0	0	0	0	0	0	0	0	0	0	0	0	0	0	0	0.133713	0	0	0	0	0	0
ENSAMEG00000001101	GL192667.1	-	887656	895213	1038	29	16	14	13	37	10	8	3	8	15	7	14	7	29	8	63	29	48	18	65	45	37	33	9	46	1.63879	1.00467	0.817849	0.747477	2.01215	0.516643	0.381418	0.155433	0.483935	0.675799	0.492162	1.00293	0.496399	1.85018	0.443184	3.74286	2.12466	3.36253	1.18758
ENSAMEG00000001102	GL192819.1	-	913129	916770	1485	16	2	0	2	11	9	0	0	0	10	139	35	30	19	113	112	8	22	7	42	78	29	18	3	45	0.632	0.0877816	0	0.0803814	0.418139	0.325015	0	0	0	0.314918	6.83117	1.75259	1.48705	0.847308	4.37566	4.65107	0.409686	1.07725	0.322819
ENSAMEG00000001103	GL192402.1	+	3165802	3177259	1674	174	69	202	93	134	190	139	61	79	234	539	472	562	525	767	474	394	656	428	541	262	133	453	186	241	6.09702	2.68654	7.31709	3.31573	4.5186	6.08676	4.1093	1.95971	2.96323	6.53708	23.4985	20.9665	24.7122	20.7691	26.347	17.4616	17.899	28.4951	17.5096
ENSAMEG00000001104	GL192386.1	+	2715222	2720538	357	1	1	6	4	2	0	0	0	0	1	0	0	0	0	0	1	0	4	4	1	0	1	1	1	0	0.164307	0.182571	1.01912	0.668719	0.31624	0	0	0	0	0.130995	0	0	0	0	0	0.17274	0	0.81473	0.767325
ENSAMEG00000001105	GL193080.1	-	301583	338132	3003	0	2	0	0	0	0	0	0	0	0	0	0	0	0	0	2	0	0	0	1	0	0	0	0	1	0	0.0434085	0	0	0	0	0	0	0	0	0	0	0	0	0	0.041071	0	0	0
ENSAMEG00000001106	GL193035.1	-	58035	857540	477	0	0	0	0	0	2	34	2	28	4	5	7	19	3	11	1	0	0	2	0	64	117	28	891	6	0	0	0	0	0	0.154769	2.42803	0.155208	2.53699	0.26993	0.526555	0.75111	2.01814	0.286683	0.912748	0.0889872	0	0	0.197644
ENSAMEG00000001108	GL192647.1	-	18219	52066	1305	2777	1441	2125	1543	1988	886	696	757	510	728	1477	1295	1816	1214	1929	1765	1296	1870	1448	1702	1121	1259	1400	1012	1124	124.821	71.9704	98.7394	70.568	85.9925	36.4092	26.3941	31.1963	24.5388	26.0882	82.5994	73.7901	102.432	61.6059	84.9989	83.4056	75.5236	104.197	75.9881
ENSAMEG00000001109	GL192386.1	+	2772549	2806452	1218	2199	1271	1956	1232	1775	955	939	1396	579	1315	443	309	548	414	720	438	208	588	308	516	620	681	642	454	857	114.758	73.702	105.522	65.4179	89.1429	45.5643	41.3436	66.794	32.345	54.7121	28.7637	20.4424	35.8876	24.3921	36.8348	24.0308	14.0729	38.0394	18.766
ENSAMEG00000001110	GL194728.1	-	68099	87875	966	83	151	50	207	64	612	213	183	172	315	1988	1721	1314	1444	1802	214	291	175	374	237	633	562	649	362	577	5.03993	10.1883	3.13859	12.7893	3.73988	33.9752	10.9122	10.1881	11.1801	15.2496	150.192	132.478	100.126	98.993	107.268	13.6615	22.9089	13.1729	26.5144
ENSAMEG00000001111	GL193502.1	+	249984	251743	676	3163	1947	2847	3698	3447	5316	6958	3984	5037	7202	5480	5172	7326	6176	11143	4140	3591	5300	3950	4717	3660	8014	5112	8987	5102	274.458	187.724	255.378	326.492	287.839	421.722	509.385	316.95	467.864	498.23	591.617	568.919	797.72	605.027	947.866	377.672	403.977	570.1	400.164
ENSAMEG00000001112	GL193288.1	+	626582	667601	1554	123	462	134	196	140	0	0	0	1	0	0	0	0	1	0	1088	393	488	558	888	0	0	0	0	0	4.64278	19.3772	5.22873	7.52761	5.08548	0	0	0	0.0404058	0	0	0	0	0.0426151	0	43.1756	19.2322	22.8345	24.5907
ENSAMEG00000001113	GL193300.1	-	93666	95974	1473	217	53	129	39	154	450	131	63	75	230	569	382	349	245	509	431	162	346	155	338	397	279	361	110	263	8.64133	2.34516	5.31042	1.58021	5.90164	16.3832	4.40126	2.30015	3.19708	7.30212	28.1914	19.2841	17.4403	11.0148	19.8704	18.0441	8.36374	17.0803	7.20637
ENSAMEG00000001114	GL192402.1	+	925807	3188950	537	50	9	33	13	30	36	8	1	11	28	106	40	142	59	98	40	77	178	134	99	45	32	68	28	42	4.35145	0.870328	2.9689	1.15116	2.51256	2.86438	0.587407	0.0797918	1.02477	1.94277	11.4777	4.41305	15.5081	5.79704	8.36099	3.65983	8.68798	19.2036	13.6155
ENSAMEG00000001115	GL192667.1	+	906453	909374	1143	735	657	679	615	478	6775	3731	1015	2476	4146	1456	1748	1507	1712	1613	2453	1826	1585	1979	1943	2383	2020	1886	1432	1967	37.7194	37.4644	36.0218	32.113	23.6068	317.871	161.543	47.7571	136.019	169.632	92.9656	113.719	97.0504	99.1909	81.1484	132.346	121.491	100.834	118.573
ENSAMEG00000001116	GL192453.1	+	1310731	1327965	1242	95	65	104	96	81	136	97	24	67	90	719	597	633	597	765	307	192	156	184	208	120	109	223	79	92	4.79971	3.64906	5.43179	4.93505	3.93829	6.28195	4.13474	1.11172	3.62357	3.62522	45.1964	38.2368	40.133	34.0531	37.8897	16.3067	12.5764	9.77045	10.8536
ENSAMEG00000001117	GL193880.1	+	165614	229282	2691	60086	70160	47051	75127	42045	1	0	6	19	0	7	13	25	34	13	16	12	46	40	47	106	91	164	24	136	1309.73	1699.32	1060.22	1666.23	881.974	0.0199285	0	0.11991	0.443337	0	0.189842	0.359227	0.683843	0.836719	0.277793	0.366663	0.339122	1.24299	1.01797
ENSAMEG00000001120	GL192522.1	+	837584	856305	1707	15	12	12	25	12	41	63	7	77	60	342	231	390	339	383	185	186	205	249	330	64	55	112	29	80	0.520013	0.462254	0.430054	0.881844	0.400346	1.29949	1.84268	0.222493	2.85749	1.65834	14.7514	10.152	16.9666	13.2683	13.0164	6.74267	8.35989	8.80999	10.0783
ENSAMEG00000001121	GL193655.1	+	498866	509758	2256	313	390	307	423	286	194	178	23	155	155	647	552	511	550	692	638	695	574	681	681	284	168	476	370	236	8.13821	11.2675	8.25166	11.1906	7.15619	4.61159	3.90472	0.548286	4.31407	3.21304	20.9301	18.1944	16.6729	16.145	17.6384	17.4398	23.4279	18.501	20.6726
ENSAMEG00000001122	GL193502.1	-	250395	251686	309	0	0	0	0	0	1	0	0	0	0	4	0	0	0	1	1	2	0	0	0	0	0	0	0	1	0	0	0	0	0	0.173552	0	0	0	0	0.944732	0	0	0	0.186094	0.199573	0.49222	0	0
ENSAMEG00000001123	GL193300.1	-	98662	118122	2892	1562	729	1301	557	991	680	186	37	139	400	644	500	570	451	682	830	459	613	460	766	659	468	525	280	563	31.6815	16.4297	27.2785	11.495	19.3433	12.6095	3.1829	0.688053	3.01794	6.46823	16.2515	12.8561	14.508	10.3274	13.5606	17.6987	12.0699	15.4129	10.893
ENSAMEG00000001124	GL192386.1	-	2808301	2873964	8019	443	235	202	368	261	1047	876	16	570	503	2192	2417	1661	1753	1630	2325	1681	1206	1888	1613	788	355	844	362	412	3.24046	1.91006	1.52747	2.73892	1.83728	7.00187	5.40621	0.107305	4.46323	2.9334	19.9493	22.4128	15.2468	14.4769	11.6885	17.8798	15.9417	10.9358	16.1239
ENSAMEG00000001125	GL193502.1	+	261231	277203	1769	9	8	3	15	6	78	57	12	31	38	3597	1688	1489	846	2296	221	296	136	319	143	51	35	38	17	18	0.298427	0.294756	0.102834	0.506076	0.19146	2.36458	1.59461	0.364814	1.10034	1.00457	148.395	70.9551	61.958	31.6706	74.6338	7.70416	12.7248	5.59028	12.3495
ENSAMEG00000001126	GL192583.1	+	918426	938745	1479	136	87	108	118	162	187	227	13	298	189	517	325	306	540	550	338	424	492	424	556	187	35	375	160	259	5.39379	3.83399	4.4279	4.76174	6.18304	6.78049	7.59567	0.472709	12.6515	5.97609	25.5111	16.3401	15.2294	24.1791	21.3839	14.0932	21.8015	24.1891	19.6329
ENSAMEG00000001127	GL193655.1	-	515831	543436	615	941	751	799	1232	813	1689	1490	638	1069	2256	1598	2383	1917	3381	2404	3222	3338	2352	3296	3398	2517	2291	2425	2045	3203	89.7508	79.5912	78.7796	119.56	74.6226	147.28	119.9	55.791	109.143	171.549	189.631	288.13	229.444	364.07	224.777	323.081	412.762	278.089	367.028
ENSAMEG00000001128	GL194786.1	-	73649	82422	1359	427	61	67	70	188	14	27	0	29	14	549	106	256	72	447	185	102	71	120	96	218	203	129	90	138	18.4303	2.92557	2.98949	3.07419	7.80896	0.552454	0.983225	0	1.3399	0.481762	29.4822	5.79996	13.866	3.50855	18.9138	8.39485	5.7078	3.79893	6.04713
ENSAMEG00000001129	GL192911.1	+	709813	731216	1584	0	3	0	0	0	0	1	0	0	0	2	0	3	2	9	3	3	0	0	1	10	2	7	0	1	0	0.123443	0	0	0	0	0.0312431	0	0	0	0.0921471	0	0.139411	0.0836159	0.326722	0.116796	0.14403	0	0
ENSAMEG00000001130	GL193151.1	+	522548	659604	991	0	0	0	0	0	0	0	0	0	0	0	0	0	0	0	0	0	0	0	0	0	0	0	0	0	0	0	0	0	0	0	0	0	0	0	0	0	0	0	0	0	0	0	0
ENSAMEG00000001131	GL192453.1	+	1357465	1371976	1752	445	437	274	497	167	103	258	8	174	49	785	773	569	429	492	1015	872	533	836	452	321	360	332	291	142	14.8987	16.2573	9.48328	16.9307	5.38068	3.15276	7.28776	0.245569	6.23605	1.30793	32.6996	32.8083	23.9061	16.2158	16.1481	35.7267	37.8504	22.1215	32.6783
ENSAMEG00000001132	GL194729.1	-	233	140854	939	428	111	303	157	384	478	224	163	261	496	522	221	530	360	783	940	211	448	309	1189	959	540	1199	231	1032	14.2321	4.10133	10.4156	5.31194	12.2882	14.5317	6.28432	4.96944	9.29044	13.1494	21.5963	9.31607	22.1161	13.5151	25.5244	32.8617	9.09645	18.4672	11.9963
ENSAMEG00000001133	GL192647.1	+	82429	84967	279	192	43	102	102	231	31	8	56	4	49	167	93	255	83	241	315	41	110	27	275	481	582	225	2842	271	40.3665	10.0453	22.1686	21.8197	46.7372	5.95862	1.41904	10.7945	0.900223	8.21326	43.6837	24.7866	67.2769	19.701	49.6712	69.6253	11.1755	28.6689	6.62746
ENSAMEG00000001134	GL192992.1	+	1004554	1081253	1128	37	51	28	59	28	30	41	0	34	25	80	73	65	95	79	76	59	73	58	101	63	21	96	42	60	1.92405	2.94687	1.50519	3.12173	1.40121	1.42626	1.7988	0	1.89262	1.03646	5.17592	4.8123	4.24165	5.57736	4.02726	4.15495	3.97769	4.70583	3.52133
ENSAMEG00000001135	GL193726.1	-	5635	7040	504	0	3	0	1	4	34	3	0	0	22	11	11	15	6	7	2	3	5	2	2	67	27	41	3	69	0	0.435487	0	0.132925	0.502885	4.06088	0.330661	0	0	2.2914	1.78794	1.82174	2.45909	0.884951	0.896486	0.274691	0.508116	0.80974	0.30505
ENSAMEG00000001136	GL192647.1	-	94204	204537	4659	388	672	290	375	226	307	320	7	237	153	853	822	575	554	700	956	1063	565	891	766	832	529	753	413	530	4.88498	9.40106	3.7744	4.80386	2.73823	3.53373	3.39912	0.0808023	3.19411	1.53576	13.3618	13.1195	9.08459	7.87465	8.63967	12.6539	17.3512	8.81816	13.097
ENSAMEG00000001137	GL195225.1	-	28038	34276	900	228	123	293	205	265	128	153	251	143	265	521	349	729	598	711	324	385	726	396	548	294	304	525	306	490	14.8599	8.90764	19.7409	13.5945	16.621	7.62703	8.41313	14.9986	9.97672	13.7698	42.2476	28.8351	59.6232	44.0021	45.4275	22.2005	32.5317	58.6565	30.1328
ENSAMEG00000001138	GL194499.1	+	54419	97816	2031	272	302	324	263	252	439	358	81	270	443	865	468	722	670	1016	880	874	980	831	1157	632	270	1171	428	854	7.85566	9.69164	9.67336	7.72855	7.00399	11.5916	8.72332	2.14483	8.34734	10.2004	31.0823	17.1346	26.1672	21.8464	28.7657	26.7198	32.7258	35.0864	28.0207
ENSAMEG00000001139	GL193726.1	-	64710	155847	3309	1076	986	1282	1643	1394	780	889	267	1026	1730	1093	897	1188	1507	1826	1552	2084	1735	2427	2705	892	668	1642	1425	1734	19.0739	19.4214	23.4927	29.6342	23.7805	12.6411	13.2958	4.33943	19.4691	24.4497	24.1063	20.1574	26.4271	30.16	31.7319	28.9238	47.8949	38.1263	50.2297
ENSAMEG00000001140	GL194786.1	-	116439	123786	654	310	172	263	240	245	394	414	239	359	327	338	309	333	322	367	374	272	350	305	386	411	526	442	353	438	27.804	17.1416	24.3849	21.9021	21.1467	32.3077	31.3279	19.6534	34.4676	23.3826	37.7178	35.1334	37.4798	32.6056	32.2686	35.2659	31.6285	38.9146	31.9381
ENSAMEG00000001141	GL192819.1	-	934027	944306	1791	205	32	63	49	74	1007	333	42	237	633	1308	893	1180	745	1267	1169	404	541	403	992	925	929	872	219	669	6.71401	1.16454	2.13298	1.63287	2.33234	30.1524	9.20147	1.26117	8.30897	16.5284	53.299	37.0762	48.4972	27.547	40.6792	40.2513	17.1543	21.9646	15.4098
ENSAMEG00000001142	GL193687.1	+	142958	422702	1623	7	2	2	19	7	8	57	14	36	13	149	105	159	191	272	109	137	154	160	183	6	21	30	59	16	0.294128	0.093378	0.0868734	0.812307	0.283053	0.307321	2.02068	0.539338	1.61924	0.435493	7.78947	5.59297	8.38382	9.06071	11.2041	4.81506	7.46317	8.02153	7.84914
ENSAMEG00000001143	GL193151.1	+	667330	810393	1451	0	0	0	0	0	0	0	0	0	0	0	0	0	0	0	0	0	0	0	0	0	0	0	0	0	0	0	0	0	0	0	0	0	0	0	0	0	0	0	0	0	0	0	0
ENSAMEG00000001144	GL194809.1	+	5137	30905	825	0	0	0	0	0	0	0	0	0	0	1	0	0	0	0	19	6	1	7	14	0	1	0	0	0	0	0	0	0	0	0	0	0	0	0	0.0884613	0	0	0	0	1.42024	0.553077	0.088139	0.581074
ENSAMEG00000001145	GL193373.1	+	335796	354380	723	377	152	200	283	195	252	347	72	230	168	1510	1553	1161	1346	1780	1745	720	703	889	1142	1087	1225	820	568	782	30.5863	13.7027	16.7739	23.3615	15.2248	18.6918	23.752	5.35565	19.9749	10.8666	152.421	159.725	118.202	123.288	141.571	148.839	75.7325	70.7032	84.2075
ENSAMEG00000001146	GL193151.1	+	711752	883276	1859	0	0	0	0	0	0	0	0	0	0	0	0	0	0	0	0	0	0	0	0	0	0	0	0	0	0	0	0	0	0	0	0	0	0	0	0	0	0	0	0	0	0	0	0
ENSAMEG00000001147	GL193687.1	-	431249	448060	609	149	49	77	64	140	333	286	168	141	645	192	267	352	329	344	143	58	113	56	166	157	97	137	111	219	14.3513	5.2442	7.66683	6.27213	12.9767	29.3234	23.2411	14.8358	14.5377	49.5297	23.0086	32.6011	42.5457	35.7761	32.4813	14.4804	7.24267	13.4922	6.29736
ENSAMEG00000001149	GL194809.1	-	66393	111414	3573	295	95	350	178	269	353	205	28	190	374	734	546	836	827	945	543	601	883	636	775	442	190	598	217	522	4.84298	1.73297	5.93987	2.9733	4.24986	5.29821	2.83942	0.421447	3.33899	4.89511	14.9924	11.3631	17.2228	15.328	15.2086	9.3719	12.7917	17.9701	12.1902
ENSAMEG00000001150	GL193753.1	-	96848	424155	1821	97	33	26	55	83	16	8	0	15	12	43	33	28	38	44	204	261	271	394	156	209	240	268	106	133	2.21824	0.838546	0.61465	1.27976	1.82661	0.334519	0.154352	0	0.367196	0.218785	1.22346	0.956677	0.803528	0.981094	0.986409	4.9046	7.73822	7.68253	10.5195
ENSAMEG00000001151	GL193373.1	-	357798	371543	2358	185	65	92	97	129	332	226	56	203	229	465	266	346	270	449	242	125	244	144	207	234	233	374	103	227	4.64539	1.8136	2.38813	2.47828	3.11725	7.62172	4.78789	1.28924	5.45654	4.58444	14.5274	8.46735	10.9027	7.6543	11.0526	6.38857	4.06935	7.5952	4.2216
ENSAMEG00000001152	GL192373.1	+	3281537	3388179	1302	21	16	12	47	32	17	21	21	16	44	32	33	35	25	63	17	23	33	35	21	109	66	182	107	142	0.946089	0.800957	0.558872	2.15446	1.38738	0.700206	0.79821	0.867414	0.77162	1.58039	1.79368	1.8847	1.97873	1.27158	2.78241	0.805191	1.3434	1.843	1.84096
ENSAMEG00000001153	GL192583.1	+	1292049	1359425	4047	17	4	1	38	9	95	20	0	21	54	76	33	49	41	79	166	50	38	62	132	77	24	151	39	49	0.246399	0.0644209	0.0149834	0.560406	0.125535	1.25886	0.244571	0	0.325822	0.623999	1.37053	0.606345	0.891237	0.670911	1.1225	2.52951	0.939561	0.682767	1.04917
ENSAMEG00000001154	GL192819.1	+	934172	936814	639	26	5	6	6	3	32	17	2	14	19	159	85	151	45	82	54	47	72	40	44	56	38	51	11	48	2.38669	0.509999	0.569367	0.560406	0.265018	2.68557	1.31661	0.168325	1.37569	1.39052	18.1595	9.89138	17.3943	4.66365	7.37912	5.21139	5.59352	8.1932	4.28693
ENSAMEG00000001156	GL192369.1	+	173234	254662	969	47	23	47	37	61	358	287	334	178	530	100	59	95	115	127	104	68	141	92	146	267	207	393	190	457	2.8451	1.54705	2.94114	2.27893	3.55354	19.8129	14.6577	18.5371	11.5343	25.5785	7.53153	4.52759	7.21656	7.85938	7.53653	6.61867	5.33671	10.5808	6.50207
ENSAMEG00000001158	GL192819.1	+	955883	966652	1413	198	11	24	8	59	116	44	12	29	35	304	141	127	61	148	1375	650	663	239	476	1215	781	393	55	437	8.21952	0.5074	1.02994	0.337909	2.35703	4.40254	1.54106	0.456728	1.2887	1.15838	15.7014	7.4202	6.61594	2.85892	6.02298	60.0097	34.9832	34.1188	11.5836
ENSAMEG00000001159	GL192534.1	+	511029	518160	822	0	0	0	0	1	1	0	0	0	0	2	0	0	0	1	0	0	1	1	4	0	0	1	0	4	0	0	0	0	0.0686725	0.0652403	0	0	0	0	0.177568	0	0	0	0.0699552	0	0	0.0884607	0.0833136
ENSAMEG00000001160	GL192667.1	-	910916	962929	3999	358	215	261	232	255	412	490	42	465	264	992	800	820	848	921	1043	723	721	836	950	588	468	768	351	514	5.25116	3.50419	3.95759	3.46249	3.59951	5.52502	6.06392	0.564828	7.30123	3.08728	18.1037	14.8757	15.0936	14.043	13.2434	16.084	13.7491	13.1101	14.3167
ENSAMEG00000001161	GL193300.1	-	129521	201620	918	248	194	266	244	233	28	48	5	40	34	85	117	154	139	143	83	111	97	121	86	76	59	78	94	68	15.8465	13.774	17.5704	15.8635	14.3274	1.6357	2.58766	0.292918	2.73597	1.73205	6.75746	9.47725	12.3483	10.0274	8.95746	5.57566	9.19535	7.68336	9.02672
ENSAMEG00000001162	GL192534.1	-	536908	546409	288	198	87	198	104	239	134	298	555	206	346	157	114	264	153	371	184	78	270	89	280	185	182	251	143	269	40.327	19.6891	41.6884	21.5523	46.8447	24.9517	51.2074	103.638	44.9127	56.1833	39.7845	29.4341	67.4748	35.1814	74.0752	39.3991	20.5963	68.17	21.1634
ENSAMEG00000001163	GL192534.1	+	861617	947386	4940	36	41	25	49	30	14	107	4	95	25	241	195	273	241	310	284	396	197	418	389	163	70	218	106	207	0.427464	0.54095	0.306871	0.591999	0.342807	0.151981	1.07193	0.0435463	1.20751	0.236666	3.56039	2.93526	4.06786	3.23076	3.6085	3.54529	6.09616	2.89976	5.79478
ENSAMEG00000001164	GL192369.1	-	256560	262204	156	1005	636	885	708	1074	322	412	1050	237	711	420	373	550	581	842	506	500	1049	613	607	591	706	882	745	950	377.89	265.725	344.002	270.87	388.628	110.693	130.702	361.979	95.3934	213.142	196.486	177.796	259.519	246.641	310.37	200.026	243.744	488.96	269.106
ENSAMEG00000001165	GL193080.1	+	359345	363862	1164	37	25	34	40	47	14	24	1	24	14	52	66	35	84	72	45	39	43	45	42	13	18	26	30	25	1.86454	1.39987	1.7712	2.05097	2.27929	0.645005	1.02039	0.0462025	1.29465	0.562469	3.2603	4.21628	2.21333	4.77904	3.5569	2.38408	2.548	2.6862	2.64757
ENSAMEG00000001166	GL192369.1	-	297187	432367	5340	5	2	2	1	15	3	4	0	4	12	0	5	1	3	4	0	9	2	1	9	4	2	14	2	5	0.0549228	0.0244112	0.0227107	0.0111766	0.158564	0.0301278	0.0370704	0	0.0470341	0.105091	0	0.0696254	0.0137844	0.0372044	0.0430735	0	0.128171	0.027234	0.0128247
ENSAMEG00000001167	GL193409.1	+	284685	300096	1257	98	59	107	160	92	84	154	73	157	97	466	559	495	1029	635	813	724	554	858	924	194	160	342	263	201	4.57314	3.05926	5.16168	7.59691	4.1315	3.5837	6.06309	3.12324	7.84258	3.60878	27.0556	33.0686	28.9868	54.2119	29.0489	39.8856	43.8017	32.0477	46.7455
ENSAMEG00000001168	GL192369.1	-	329096	355748	2412	328	149	296	178	295	321	377	601	290	512	457	284	512	394	737	528	236	564	268	668	329	274	631	186	562	7.97664	4.02633	7.44143	4.40448	6.90398	7.137	7.73522	13.4003	7.54945	9.92696	13.8276	8.75548	15.6251	10.8177	17.5704	13.4995	7.44085	17.0029	7.6093
ENSAMEG00000001169	GL195441.1	+	10004	10970	330	0	1	7	0	0	3	10	30	10	9	2881	1664	4914	3440	5042	177	103	1015	221	350	1	15	36	6	2	0	0.198109	1.29016	0	0	0.489005	1.50422	4.90392	1.90853	1.27929	639.079	376.094	1099.43	692.432	881.249	33.1771	23.8084	224.333	46.0028
ENSAMEG00000001170	GL193431.1	+	7921	8881	927	1	0	2	0	3	0	0	0	0	0	0	0	0	1	2	1	0	1	0	2	2	0	4	0	0	0.0632767	0	0.130826	0	0.182682	0	0	0	0	0	0	0	0	0.0714389	0.124063	0.0665244	0	0.0784409	0
ENSAMEG00000001171	GL196986.1	+	623	1109	375	0	0	0	0	0	0	0	0	0	0	6	7	40	6	21	4	0	33	1	1	0	0	0	0	0	0	0	0	0	0	0	0	0	0	0	1.16769	1.38805	7.85162	1.05958	3.22018	0.657793	0	6.39889	0.182623
ENSAMEG00000001172	GL195916.1	-	14222	15464	384	0	0	1	0	0	4	0	3	5	1	659	464	2249	1154	1720	32	34	366	93	91	0	0	11	2	1	0	0	0.16613	0	0	0.587699	0	0.442025	0.860145	0.128124	131.765	94.5288	453.552	209.376	270.974	5.40652	7.08393	72.9139	17.4493
ENSAMEG00000001173	GL193080.1	-	366298	369263	567	81	46	84	65	78	288	193	130	133	336	257	202	274	235	411	170	199	190	260	198	167	110	160	99	241	8.37964	5.2878	8.98335	6.84199	7.76545	27.2394	16.8455	12.3304	14.7287	27.7128	33.0794	26.4915	35.5711	27.4473	41.6822	18.4896	26.6906	24.3665	31.4035
ENSAMEG00000001174	GL193431.1	-	17491	38373	948	534	326	286	401	417	926	600	146	509	802	538	346	357	334	734	604	186	337	278	526	933	973	798	493	1007	33.0413	22.4135	18.2936	25.2457	24.8303	52.383	31.3222	8.28253	33.7135	39.563	41.4172	27.1398	27.7198	23.332	44.5225	39.2907	14.9208	25.849	20.0828
ENSAMEG00000001175	GL192373.1	-	3393906	3421095	1062	49	36	65	67	72	101	116	99	118	196	275	185	383	291	424	256	211	346	231	436	214	190	400	234	393	2.70642	2.20942	3.71134	3.76532	3.82704	5.10017	5.40558	5.01336	6.97673	8.63088	18.898	12.9535	26.5463	18.1461	22.9579	14.8654	15.1094	23.6905	14.8962
ENSAMEG00000001176	GL192522.1	-	890962	893368	594	0	0	0	0	0	0	0	0	0	0	0	0	0	0	0	0	0	0	0	0	0	0	0	0	0	0	0	0	0	0	0	0	0	0	0	0	0	0	0	0	0	0	0	0
ENSAMEG00000001177	GL194499.1	-	101575	106676	1338	1027	1018	573	867	564	522	601	16	415	262	1973	2920	1158	1989	1316	2325	7762	3672	7154	1865	1470	1214	1109	798	867	45.0234	49.5897	25.9681	38.6736	23.7946	20.922	22.2294	0.643105	19.4754	9.15733	107.616	162.28	63.7064	98.4448	56.5577	107.159	441.17	199.558	366.168
ENSAMEG00000001179	GL192522.1	-	974281	977671	1518	101	158	63	198	60	1196	2704	45	2171	1096	250	597	178	629	257	259	621	202	509	277	517	493	474	316	601	3.90277	6.78399	2.51658	7.78477	2.23118	42.252	88.1543	1.59426	89.8013	33.7647	12.0192	29.2443	8.63135	27.4406	9.73538	10.5218	31.1106	9.67613	22.9633
ENSAMEG00000001180	GL192911.1	+	734019	744845	1551	264	100	170	109	186	86	96	24	98	60	512	328	377	384	527	509	287	363	360	478	353	205	372	298	306	9.98426	4.20231	6.64629	4.19437	6.76949	2.97354	3.06315	0.832181	3.96742	1.8091	24.0916	15.7254	17.892	16.3958	19.5385	20.238	14.0721	17.0183	15.8956
ENSAMEG00000001181	GL193726.1	+	191698	204910	666	21	4	13	7	25	30	20	15	8	78	35	18	35	34	103	46	14	44	14	84	39	8	112	24	86	1.84956	0.391459	1.18362	0.627301	2.11895	2.41565	1.48616	1.21125	0.754241	5.47702	3.83531	2.00973	3.86834	3.3808	8.89313	4.25936	1.59861	4.80397	1.4396
ENSAMEG00000001182	GL193080.1	+	369949	370334	141	796	446	342	352	456	136	118	37	62	114	218	230	115	147	230	221	173	128	149	203	321	344	189	203	278	331.145	206.165	147.078	148.996	182.558	51.7259	41.4163	14.1124	27.61	37.8102	112.835	121.296	60.0356	69.0419	93.7995	96.6572	93.3072	66.0105	72.3693
ENSAMEG00000001183	GL192453.1	-	1378655	1388261	450	21	14	47	6	34	10	1	2	4	17	43	13	69	39	71	43	24	109	27	60	27	9	115	7	36	2.73735	2.02776	6.33326	0.795776	4.26502	1.19172	0.109976	0.239021	0.558138	1.76669	6.9737	2.14818	11.2867	5.7394	9.07272	5.89273	4.0559	17.6131	4.10902
ENSAMEG00000001184	GL192534.1	-	1009748	1154035	4503	0	1	0	1	8	42	28	0	18	108	2	6	2	42	5	567	680	264	643	650	2	8	25	3	6	0	0.0144743	0	0.0132541	0.100287	0.50019	0.307726	0	0.250995	1.12162	0.0324142	0.0990805	0.0326933	0.617677	0.0638498	7.76501	11.4841	4.26309	9.77905
ENSAMEG00000001185	GL193409.1	+	373302	441047	2934	230	171	319	353	337	428	263	307	359	834	536	557	772	934	906	525	814	930	997	923	402	354	958	590	798	4.59824	3.79871	6.59284	7.1807	6.48373	7.82297	4.43613	5.62726	7.68296	13.2932	13.3325	14.1167	19.3681	21.0815	17.7566	11.0347	21.0985	23.0486	23.2714
ENSAMEG00000001186	GL193080.1	-	376236	411211	2244	63	20	75	40	65	80	40	31	45	61	166	189	154	322	219	179	164	327	146	167	111	83	154	60	126	1.6468	0.580908	2.02666	1.06387	1.6351	1.91186	0.882157	0.742946	1.25917	1.27125	5.39874	6.26293	5.05159	9.50271	5.61194	4.91916	5.55788	10.5961	4.45572
ENSAMEG00000001187	GL192522.1	-	1055795	1065148	1332	3	0	1	4	0	8	6	11	5	6	189	45	245	71	201	81	30	108	22	136	14	29	72	4	32	0.132112	0	0.0455237	0.179229	0	0.322087	0.222923	0.444127	0.2357	0.210654	10.3553	2.51216	13.5392	3.52995	8.67728	3.75009	1.71279	5.89578	1.13111
ENSAMEG00000001188	GL193300.1	-	308985	349941	3204	209	117	243	162	186	440	283	19	191	234	891	623	829	721	971	1241	980	830	899	1328	454	224	754	409	424	3.82629	2.38009	4.59892	3.01769	3.27699	7.36458	4.37122	0.318918	3.74313	3.41544	20.2951	14.4589	19.0455	14.9024	17.4268	23.8858	23.2606	18.8368	19.2156
ENSAMEG00000001189	GL193502.1	+	311107	317652	1233	1	16	3	9	2	10	2	0	3	2	87	779	684	690	103	16	57	43	43	10	3573	8369	1358	660	3486	0.047573	0.845779	0.147537	0.435644	0.0915634	0.434935	0.0802741	0	0.152775	0.0758561	5.14948	46.98	40.8341	37.0596	4.80359	0.800235	3.5156	2.53587	2.38832
ENSAMEG00000001190	GL193431.1	+	40794	55285	1440	225	57	96	63	156	296	173	64	112	169	333	201	266	190	299	336	121	252	166	299	286	241	298	142	223	9.16524	2.57996	4.04251	2.61114	6.11529	11.0234	5.94555	2.39021	4.88371	5.48843	16.8767	10.3794	13.5972	8.73787	11.9399	14.3892	6.39015	12.7251	7.89465
ENSAMEG00000001191	GL193726.1	+	232109	371888	990	120	41	164	66	182	203	146	228	124	494	185	102	219	150	347	125	111	299	127	188	154	123	284	86	284	4.83773	1.83663	6.83476	2.70728	7.06095	7.48206	4.96591	8.42733	5.35122	15.8777	9.27931	5.21286	11.0793	6.8272	13.7138	5.29795	5.8016	14.9427	5.97762
ENSAMEG00000001192	GL192369.1	+	357819	365572	1514	117	46	133	71	146	125	76	202	80	146	195	127	299	166	317	164	128	251	154	218	187	140	255	105	234	4.53298	1.98031	5.32682	2.79888	5.44355	4.42764	2.48426	7.17536	3.31786	4.50973	9.39974	6.23759	14.537	7.261	12.04	6.68004	6.42943	12.0551	6.96598
ENSAMEG00000001193	GL193373.1	-	374540	376478	177	1972	1591	2104	2044	2283	1093	2043	2806	1627	1925	1476	1344	2141	2048	3355	1257	943	1798	1327	1444	1866	2995	2380	1802	2974	653.518	585.864	720.8	689.223	728.094	331.158	571.22	852.575	577.177	508.606	608.583	564.631	890.376	766.251	1089.96	437.948	405.16	738.65	513.435
ENSAMEG00000001194	GL192667.1	-	969762	970880	360	0	0	0	0	0	0	0	0	0	0	0	0	0	0	0	0	0	0	0	0	0	0	0	0	0	0	0	0	0	0	0	0	0	0	0	0	0	0	0	0	0	0	0	0
ENSAMEG00000001195	GL192453.1	+	1396534	1414776	1515	233	56	182	77	235	557	285	146	226	909	421	162	383	257	584	624	260	440	274	945	401	244	569	163	703	9.02125	2.40922	7.28452	3.0334	8.75609	19.7165	9.30981	5.18273	9.36678	28.0592	20.2804	7.95136	18.6087	11.234	22.1662	25.3999	13.0512	21.1185	12.3858
ENSAMEG00000001196	GL194499.1	+	110595	141256	3963	40	25	18	28	32	52	122	8	94	52	48	54	42	28	34	471	881	825	587	554	66	34	107	13	52	0.592052	0.411165	0.275417	0.421683	0.455807	0.703667	1.52351	0.108564	1.48935	0.613625	0.883943	1.01323	0.780109	0.467895	0.49334	7.32922	16.906	15.1374	10.1438
ENSAMEG00000001197	GL193373.1	+	381876	384582	1233	120	29	75	24	121	200	109	41	69	147	128	65	99	85	159	142	41	131	63	137	261	244	273	57	271	5.70876	1.53298	3.68842	1.16172	5.53959	8.69871	4.37494	1.78829	3.51383	5.57542	7.57624	3.92003	5.9102	4.56531	7.41525	7.10209	2.52877	7.72557	3.49917
ENSAMEG00000001198	GL194009.1	+	31339	132143	3444	553	828	542	654	329	449	742	67	619	199	1892	2080	905	1440	1312	1853	2024	1155	2351	1425	949	667	827	831	665	9.41858	15.6699	9.54286	11.3336	5.39247	6.99151	10.6623	1.04624	11.2855	2.70218	40.0927	44.9096	19.3426	27.6894	21.906	33.1798	44.6926	24.386	46.7495
ENSAMEG00000001199	GL192373.1	+	3446530	3475441	2046	40	39	71	55	51	58	104	49	87	139	181	161	349	254	336	144	218	292	244	226	47	66	153	130	89	1.14677	1.24239	2.10424	1.60439	1.40708	1.52023	2.51557	1.28798	2.66998	3.17711	6.45624	5.85139	12.556	8.22134	9.44333	4.34028	8.10287	10.3777	8.16717
ENSAMEG00000001200	GL192667.1	+	994887	1039945	2560	641	638	695	728	577	472	595	203	579	383	1580	2084	1632	2855	2021	1558	2234	2069	2365	1746	620	412	944	1076	639	14.6873	16.2435	16.4622	16.9724	12.723	9.88758	11.5023	4.26456	14.2015	6.99653	45.0427	60.5336	46.9257	73.8551	45.396	37.5308	66.3638	58.7682	63.2672
ENSAMEG00000001201	GL192369.1	-	369189	387995	1167	238	100	184	130	253	256	208	88	135	448	505	269	344	332	618	325	226	394	215	407	269	171	380	187	361	11.9627	5.58508	9.56069	6.64851	12.2378	11.7641	8.82066	4.05537	7.26369	17.9527	31.5811	17.1404	21.6979	18.84	30.4515	17.1741	14.7274	24.5498	12.617
ENSAMEG00000001202	GL193373.1	-	387262	388139	255	12	17	4	3	3	19	54	0	18	6	42	24	5	9	14	69	21	18	26	36	108	47	42	10	42	2.76035	4.34519	0.951178	0.702155	0.664104	3.99578	10.48	0	4.43228	1.10036	12.0203	6.99858	1.44331	2.33731	3.15704	16.6867	6.26278	5.1328	6.98266
ENSAMEG00000001203	GL193373.1	+	392316	412539	6405	808	775	631	546	565	1972	2658	12	1832	834	2442	1658	1188	1039	1838	2901	1482	1159	1286	2406	6101	4509	5826	881	4183	7.39973	7.88647	5.97382	5.08775	4.97948	16.5111	20.5374	0.100758	17.9598	6.08934	27.8249	19.2488	13.653	10.7426	16.5013	27.9312	17.5961	13.1579	13.7502
ENSAMEG00000001204	GL194009.1	-	158340	166553	801	0	0	0	0	0	52	7	8	5	13	1	0	1	0	1	64	17	19	25	60	59	56	43	2	31	0	0	0	0	0	3.48144	0.432488	0.537126	0.391951	0.758987	0.0911118	0	0.0918962	0	0.0717892	4.92729	1.614	1.72482	2.13745
ENSAMEG00000001205	GL194808.1	-	64104	110701	1335	0	0	0	0	0	2	0	4	0	0	1	0	0	3	0	19	48	143	0	38	0	0	13	0	2	0	0	0	0	0	0.0803409	0	0.161138	0	0	0.0546671	0	0	0.148818	0	0.877674	2.73431	7.78891	0
ENSAMEG00000001206	GL193880.1	+	251473	363256	3907	508	679	237	699	272	275	555	13	519	174	982	1084	667	999	863	650	1110	803	1041	704	1147	982	1422	526	883	7.62683	11.3273	3.6783	10.6779	3.92989	3.77465	7.03005	0.178944	8.341	2.08271	18.3432	20.6312	12.5665	16.9331	12.7016	10.2596	21.6057	14.9449	18.2471
ENSAMEG00000001207	GL193431.1	-	56623	60081	564	218	61	111	83	102	376	188	21	81	235	745	547	688	467	788	1042	477	636	519	778	469	401	409	252	395	22.6726	7.04938	11.934	8.78317	10.2088	35.7517	16.4963	2.00244	9.01779	19.4855	96.4016	72.1186	89.7924	54.8343	80.3413	113.933	64.3172	81.9974	63.0196
ENSAMEG00000001208	GL192522.1	-	1107310	1183209	1320	164	130	187	159	110	467	473	183	422	564	273	354	344	599	393	418	267	259	325	499	152	138	280	343	196	7.28775	6.41903	8.59033	7.18911	4.70407	18.9728	17.7336	7.45582	20.074	19.9815	15.0937	19.942	19.1829	30.0516	17.1203	19.5282	15.3824	14.2675	16.8615
ENSAMEG00000001209	GL195002.1	+	61	1409	507	113	39	35	27	60	36	24	6	20	18	51	32	56	34	35	278	98	204	84	205	119	90	111	68	98	13.0736	5.01368	4.18603	3.1784	6.68033	3.80787	2.34267	0.636446	2.47695	1.66031	7.34124	4.69333	8.13037	4.44105	3.96965	33.8141	14.6996	29.258	11.3464
ENSAMEG00000001210	GL195002.1	+	3325	6839	942	6865	3095	2563	3405	3113	1470	1077	100	794	1156	1917	1529	1255	1419	2139	8270	4798	3608	5590	6875	2648	2788	2364	2583	2427	427.478	214.146	164.983	215.734	186.545	83.6863	56.5814	5.7091	52.9254	57.3893	148.518	120.697	98.067	99.7576	130.572	541.397	387.345	278.508	406.395
ENSAMEG00000001211	GL192911.1	+	749483	754559	1050	299	184	105	146	410	1002	148	421	76	775	76	24	52	22	84	18	13	20	9	31	3663	2661	2125	1691	3698	16.7034	11.4216	6.06376	8.29881	22.0419	51.176	6.97559	21.5631	4.54484	34.5172	5.2824	1.69966	3.64539	1.38755	4.60025	1.05717	0.941547	1.38504	0.587003
ENSAMEG00000001212	GL194855.1	-	17493	26559	1692	47	22	38	16	53	28	22	36	19	41	75	38	83	62	101	40	26	87	39	65	46	28	82	29	68	2.55505	1.32893	2.13552	0.885015	2.77274	1.39163	1.00904	1.79432	1.10567	1.77699	5.07279	2.61879	5.66222	3.80526	5.38259	2.28612	1.83248	5.863	2.47532
ENSAMEG00000001213	GL193431.1	+	64185	81394	1371	274	136	337	84	249	105	100	33	79	55	261	351	282	413	320	215	252	319	239	246	267	172	263	177	206	11.7229	6.46549	14.9051	3.65674	10.2522	4.10714	3.6097	1.29448	3.61813	1.87607	13.8934	19.0374	15.1406	19.9493	13.4216	9.67079	13.9782	16.919	11.9384
ENSAMEG00000001214	GL193080.1	-	414956	460247	3050	230	98	244	104	303	347	117	35	106	268	648	225	432	414	814	739	259	518	346	912	281	153	379	194	402	4.42335	2.09424	4.85101	2.0351	5.60787	6.10123	1.89843	0.617144	2.18223	4.10921	15.5054	5.48557	10.4259	8.98907	15.3467	14.9419	6.45785	12.3496	7.76898
ENSAMEG00000001215	GL192373.1	+	3484086	3691728	2868	80	80	58	82	80	40	23	3	35	65	183	63	83	79	259	39	24	36	10	40	436	187	685	214	614	3.02748	3.36402	2.26902	3.15743	2.91349	1.38394	0.734353	0.10409	1.41785	1.96113	8.61641	3.02237	3.94164	3.37528	9.60859	1.55165	1.17752	1.68886	0.441831
ENSAMEG00000001216	GL193502.1	-	321852	326556	591	349	236	254	213	183	335	295	105	180	233	855	824	640	722	740	743	620	602	595	604	635	629	574	344	524	34.6387	26.027	26.0608	21.5102	17.4791	30.398	24.7026	9.55477	19.124	18.4371	105.581	103.676	79.7118	80.9029	72.0006	77.5286	79.7797	74.0681	68.9473
ENSAMEG00000001217	GL192819.1	+	969614	972648	633	2636	2279	3605	3553	3990	894	873	2450	1017	1193	430	419	651	590	861	481	325	461	492	600	1302	2651	1634	1555	1981	244.267	234.661	345.338	334.999	355.815	75.7394	68.2526	208.152	100.882	88.1374	49.576	49.2209	75.702	61.7252	78.2152	46.86	39.0452	52.9565	53.2291
ENSAMEG00000001218	GL192453.1	-	1419165	1422000	813	7	0	3	2	3	7	0	0	6	10	19	5	24	20	13	10	13	19	11	24	5	1	15	1	16	0.505046	0	0.223755	0.146822	0.208298	0.461738	0	0	0.463399	0.575219	1.70557	0.457318	2.17296	1.62912	0.919485	0.758526	1.21602	1.69936	0.926594
ENSAMEG00000001219	GL194855.1	+	45354	90189	2382	100	45	99	60	104	48	22	23	16	72	142	113	230	145	195	147	97	279	118	238	228	159	519	73	282	2.46253	1.23132	2.5202	1.50336	2.4646	1.08066	0.457077	0.519283	0.421767	1.41356	4.35064	3.52757	7.10749	4.03126	4.70744	3.80572	3.09684	8.51696	3.39256
ENSAMEG00000001220	GL192453.1	+	1428544	1448497	1365	369	220	435	388	512	546	422	546	415	829	973	624	1006	1063	1648	877	723	1001	884	1326	552	670	777	627	860	15.8569	10.5049	19.3241	16.9649	21.1735	21.451	15.2999	21.5119	19.0902	28.4018	52.022	33.9931	54.2495	51.5721	69.4251	39.6212	40.2804	53.3241	44.3514
ENSAMEG00000001221	GL194855.1	-	96790	101310	1209	2	0	0	2	3	0	0	0	0	0	4	0	5	0	12	8	1	10	1	21	10	1	9	1	9	0.0970348	0	0	0.0987315	0.140072	0	0	0	0	0	0.241458	0	0.304421	0	0.570751	0.40806	0.0629016	0.601445	0.0566449
ENSAMEG00000001222	GL193376.1	+	75730	77687	240	0	0	0	0	0	1	0	0	0	1	0	0	1	0	0	2	0	0	0	0	0	0	0	0	5	0	0	0	0	0	0.223448	0	0	0	0.194855	0	0	0.306704	0	0	0.513901	0	0	0
ENSAMEG00000001223	GL193502.1	+	340756	348354	1104	573	207	187	184	450	644	263	47	189	365	1020	625	542	469	853	789	373	501	425	694	616	402	433	207	521	30.4445	12.2209	10.271	9.9472	23.009	31.2827	11.7895	2.28953	10.7495	15.4614	67.4277	42.0969	36.1377	28.1331	44.4295	44.0726	25.6938	32.9982	26.3638
ENSAMEG00000001224	GL193376.1	-	115626	473328	870	1	0	0	0	0	2	1	1	0	5	10	7	4	4	8	1	0	5	0	2	0	2	2	1	0	0.0725062	0	0	0	0	0.132577	0.0611731	0.0664768	0	0.289031	0.902108	0.643411	0.36395	0.327436	0.568634	0.0762276	0	0.449411	0
ENSAMEG00000001225	GL192369.1	-	395878	427486	1768	398	225	364	278	402	215	283	252	197	259	394	327	419	428	478	467	300	568	356	543	316	219	523	309	388	13.2046	8.2947	12.4842	9.38458	12.8351	6.52145	7.9216	7.66543	6.99646	6.8508	16.2638	13.7532	17.4446	16.0316	15.5467	16.289	12.9041	23.3608	13.7897
ENSAMEG00000001226	GL192522.1	-	1258355	1346165	2889	233	152	286	234	301	324	101	42	76	422	516	212	487	344	591	195	201	355	226	366	341	185	527	95	457	4.73077	3.42923	6.00289	4.83415	5.88131	6.0143	1.73014	0.781844	1.65181	6.83107	13.0349	5.45666	12.4083	7.88543	11.7634	4.16244	5.29099	8.93517	5.35733
ENSAMEG00000001227	GL195002.1	-	8925	55596	1707	2831	1997	2228	2658	2636	3277	2537	2107	1978	3747	1642	1695	1721	2026	2886	1878	1078	1525	1357	1948	3592	4654	3230	3533	4504	180.303	141.325	146.689	172.245	161.563	190.812	136.323	123.033	134.853	190.26	130.113	136.851	137.547	145.678	180.189	125.747	89.0117	120.402	100.904
ENSAMEG00000001228	GL192911.1	-	776561	804162	1239	394	204	351	252	357	199	219	23	217	222	540	571	765	797	765	653	700	697	799	737	527	423	583	411	682	18.653	10.7315	17.1782	12.139	16.2649	8.6133	8.74745	0.998332	10.9972	8.37925	31.8075	34.2692	45.4486	42.5992	35.5044	32.5014	42.965	40.9057	44.1634
ENSAMEG00000001229	GL193409.1	-	443297	494538	1533	1030	939	1213	1054	1421	3810	4962	4236	3021	8688	1026	2073	1776	2816	1677	2764	1521	2532	1358	2935	1181	1222	2172	1787	2024	39.4111	39.923	47.9801	41.0346	52.3247	133.282	160.186	148.605	123.738	265.034	48.8441	100.553	85.2768	121.648	62.9046	111.188	75.4528	120.1	60.666
ENSAMEG00000001230	GL192819.1	+	977687	985771	2520	569	288	150	274	182	1807	1460	39	784	730	1810	4738	1010	2422	1005	3283	2210	1403	2140	1933	671	720	320	703	279	13.2445	7.4489	3.60938	6.48936	4.07686	38.4543	28.6722	0.832305	19.5348	13.5471	52.4186	139.808	29.502	63.6485	22.9328	80.3399	66.6929	40.4836	58.1568
ENSAMEG00000001231	GL193300.1	-	371786	441557	5739	306	95	118	151	157	2859	1507	12	866	958	326	325	144	173	230	7075	1819	1439	1501	3634	5696	2372	3614	726	3130	3.13304	1.0808	1.24895	1.57308	1.54695	26.7623	13.018	0.112647	9.49147	7.82006	4.15285	4.21836	1.85018	1.99978	2.30856	76.1568	24.1458	18.2643	17.9428
ENSAMEG00000001232	GL192453.1	+	1503611	1558126	1263	17	11	15	33	37	350	174	71	122	323	114	150	80	453	149	197	213	314	175	300	170	60	187	95	278	0.789531	0.567662	0.720162	1.55942	1.65369	14.8612	6.81796	3.02324	6.06528	11.9598	6.58732	8.83134	4.66248	23.7525	6.78382	9.61886	12.8252	18.0779	9.48904
ENSAMEG00000001233	GL192453.1	+	1579479	1743469	5706	734	488	718	552	700	212	187	29	162	138	851	704	815	659	882	571	559	686	690	579	293	284	412	270	332	7.5455	5.57427	7.63018	5.77377	6.92502	1.99247	1.62188	0.273328	1.7827	1.13102	10.8844	9.17445	10.5137	7.64835	8.8885	6.17114	7.4502	8.74207	8.28142
ENSAMEG00000001234	GL193376.1	-	206523	212694	429	27	234	39	221	29	893	2256	90	1628	466	134	224	128	186	120	1384	3011	286	3720	1584	158	974	145	1023	101	3.69173	35.5516	5.51251	30.7459	3.81589	111.63	260.25	11.2825	238.282	50.7987	22.7958	38.8266	21.9626	28.7124	16.0848	198.948	533.755	48.4765	593.845
ENSAMEG00000001235	GL193431.1	+	146874	171262	1623	453	217	330	270	266	417	401	103	289	231	739	852	670	773	805	743	663	524	759	587	541	544	481	674	447	16.3721	8.71448	12.3293	9.92881	9.25163	13.7786	12.2274	3.41301	11.1808	6.65606	33.2302	39.0355	30.3869	31.541	28.5213	28.2313	31.0658	23.4766	32.0266
ENSAMEG00000001236	GL193376.1	-	319635	335250	1077	0	0	0	0	0	0	0	0	0	0	0	0	0	0	0	2	0	5	0	1	0	0	0	0	1	0	0	0	0	0	0	0	0	0	0	0	0	0	0	0	0.114518	0	0.33758	0
ENSAMEG00000001237	GL193376.1	+	334844	336803	297	0	0	0	0	0	0	0	0	0	0	0	0	0	0	0	0	0	0	0	1	0	0	0	0	0	0	0	0	0	0	0	0	0	0	0	0	0	0	0	0	0	0	0	0
ENSAMEG00000001238	GL193376.1	+	364821	409155	3747	248	313	268	319	205	198	169	42	155	149	783	665	762	744	840	501	772	718	858	506	326	204	417	269	291	3.88232	5.44454	4.33704	5.08112	3.08834	2.8338	2.23209	0.602815	2.59742	1.85963	15.2505	13.1971	14.9693	13.1493	12.891	8.24546	15.6683	13.9336	15.6816
ENSAMEG00000001239	GL193409.1	+	84691	616031	519	0	0	0	0	0	0	0	0	0	1	0	0	0	0	0	0	0	0	0	0	0	0	0	0	0	0	0	0	0	0	0	0	0	0	0.0495395	0	0	0	0	0	0	0	0	0
ENSAMEG00000001240	GL193669.1	-	13305	30491	285	0	0	0	0	0	2	1	0	0	1	0	0	0	0	0	0	0	0	0	0	1	0	0	0	1	0	0	0	0	0	0.376334	0.173646	0	0	0.164089	0	0	0	0	0	0	0	0	0
ENSAMEG00000001241	GL193669.1	-	220698	407298	997	1	1	2	0	0	0	1	0	1	0	0	1	2	1	1	1	2	3	0	3	0	0	1	2	2	0.058834	0.065374	0.12164	0	0	0	0.0496379	0	0.0629795	0	0	0.0745837	0.147661	0.0664231	0.0576762	0.0618537	0.152554	0.2188	0
ENSAMEG00000001242	GL193669.1	+	421737	423602	363	285	518	368	583	181	457	830	1479	447	534	575	854	675	1222	749	960	1120	868	1225	822	591	954	680	907	616	46.0534	93.0086	61.4729	95.8548	28.1467	67.5146	113.157	219.119	77.3206	68.7952	115.603	174.94	136.876	222.935	118.65	163.089	234.639	173.874	231.109
ENSAMEG00000001243	GL192911.1	-	809266	865019	2316	416	370	275	841	425	1166	1021	269	831	1232	2006	3253	1926	3795	2300	2383	1485	1428	1519	2689	1923	867	2690	1038	2024	10.5361	10.4127	7.20006	21.6725	10.3587	26.999	21.817	6.24643	22.5298	24.8769	63.212	104.444	61.2136	108.514	57.1059	63.4521	48.7614	44.8344	44.9166
ENSAMEG00000001244	GL192534.1	+	1214091	1262864	1431	0	9	0	3	0	0	4	0	0	3	0	8	0	9	0	8	19	2	26	25	0	11	0	5	0	0	0.409924	0	0.125122	0	0	0.138334	0	0	0.0980404	0	0.415709	0	0.416502	0	0.344755	1.00972	0.101628	1.24429
ENSAMEG00000001245	GL194499.1	+	133314	134806	189	0	0	0	0	0	0	0	0	0	0	0	0	0	0	0	0	0	0	0	0	0	0	0	0	0	0	0	0	0	0	0	0	0	0	0	0	0	0	0	0	0	0	0	0
ENSAMEG00000001246	GL193431.1	-	195373	217749	1035	231	138	292	243	233	449	445	184	443	407	617	517	716	807	923	597	708	715	1047	913	766	610	838	681	948	13.0917	8.69038	17.1074	14.0126	12.7078	23.2645	21.2779	9.56083	26.8756	18.3898	43.5063	37.144	50.9217	51.6354	51.2806	35.5709	52.0213	50.2328	69.2778
ENSAMEG00000001247	GL194499.1	-	145454	149603	1761	1147	4273	931	3992	586	351	3195	132	1915	193	1081	5253	802	4292	848	1124	10846	2222	10440	519	823	2467	643	2192	469	38.2057	158.152	32.0577	135.295	18.7842	10.689	89.7884	4.03119	68.2816	5.12533	44.7995	221.813	33.5232	161.404	27.6903	39.3612	468.38	91.7502	406.002
ENSAMEG00000001248	GL193669.1	+	493425	516131	333	195	36	237	50	192	122	11	7	13	97	365	63	225	112	549	1100	125	203	152	1218	154	23	159	102	130	35.3031	7.24199	44.3553	9.21037	33.4512	20.1931	1.68018	1.16191	2.51937	14.0007	82.2157	14.4589	51.1173	22.8922	97.4359	209.367	29.3395	45.5589	32.1282
ENSAMEG00000001249	GL193892.1	+	321743	349584	630	1	0	0	0	0	0	0	1	0	0	48	39	76	82	105	21	30	35	30	28	5	1	12	17	2	0.0931072	0	0	0	0	0	0	0.0853646	0	0	5.56042	4.60323	8.8798	8.61961	9.58386	2.0556	3.62134	4.0397	3.26113
ENSAMEG00000001250	GL192647.1	-	218971	351895	8655	580	767	687	881	563	332	424	31	364	147	1526	1184	1328	953	1368	1122	1329	1121	1229	1106	758	552	1205	588	598	3.93083	5.77602	4.81318	6.07521	3.67195	2.05712	2.42442	0.192625	2.64076	0.794281	12.8675	10.1724	11.2944	7.29189	9.08889	7.99441	11.6774	9.41804	9.72461
ENSAMEG00000001251	GL193502.1	-	349975	353285	1242	144	142	39	67	52	181	410	7	199	63	224	170	121	82	127	280	176	135	163	156	290	224	134	95	148	6.80087	7.4519	1.90408	3.21963	2.3634	7.81529	16.3369	0.303106	10.0606	2.37215	13.1624	10.1781	7.17124	4.37227	5.87995	13.9026	10.7765	7.90377	8.9878
ENSAMEG00000001252	GL193892.1	+	357937	369883	1146	151	30	101	29	84	146	48	55	42	215	258	99	206	129	306	124	58	150	68	165	167	92	214	54	244	7.72887	1.70623	5.34415	1.51031	4.13761	6.83213	2.07284	2.58105	2.30122	8.77359	16.4302	6.42376	13.2316	7.45452	15.3542	6.67264	3.84885	9.51763	4.06361
ENSAMEG00000001253	GL192369.1	-	463160	487028	1878	11	2	4	5	6	2139	434	83	296	1450	3	3	1	0	3	3	4	8	0	3	40	21	45	25	31	0.343574	0.069412	0.129154	0.158901	0.180348	61.0806	11.4368	2.37684	9.8967	36.1074	0.116582	0.118786	0.0391954	0	0.0918581	0.0985114	0.161977	0.309754	0
ENSAMEG00000001254	GL193502.1	-	358139	367607	1890	265	220	124	105	156	232	132	13	129	93	415	345	235	223	273	433	138	195	131	267	382	170	286	95	243	8.22447	7.58684	3.97834	3.31573	4.65927	6.58285	3.45637	0.369913	4.28571	2.30115	16.0248	13.5736	9.15243	7.81371	8.30601	14.1282	5.55272	7.50231	4.74676
ENSAMEG00000001255	GL192583.1	+	1392533	1411187	3120	46	8	3	19	27	5	12	1	9	0	86	57	47	49	72	8	14	12	27	2	12	7	5	5	7	0.864822	0.167123	0.0583054	0.363455	0.488499	0.0859416	0.190342	0.0172371	0.181127	0	2.01164	1.3585	1.10885	1.04005	1.327	0.158123	0.341241	0.279672	0.592648
ENSAMEG00000001256	GL192534.1	+	1284818	1342599	1199	1	2	0	9	0	12	25	1	11	7	32	27	35	18	54	99	21	28	24	93	7	4	5	0	0	0.048922	0.10872	0	0.447997	0	0.536723	1.03188	0.0448538	0.57606	0.273025	1.94777	1.67449	2.14872	0.994186	2.5898	5.09186	1.33195	1.69809	1.37082
ENSAMEG00000001257	GL194499.1	-	209381	209966	558	1	1	1	0	2	3	12	28	9	1	3	5	2	3	3	7	11	7	15	9	10	8	26	2	13	0.105121	0.116806	0.10867	0	0.202326	0.28832	1.06428	2.69862	1.01275	0.0838088	0.392368	0.666308	0.263831	0.356042	0.309157	0.773615	1.49916	0.912191	1.84096
ENSAMEG00000001258	GL195004.1	+	19760	91058	867	169	131	121	241	107	366	671	38	524	355	1081	1591	1365	1555	1293	1336	780	1063	1100	1095	449	538	785	396	332	4.15644	3.58	3.07637	6.03088	2.53251	8.22963	13.9233	0.856867	13.7955	6.96087	33.0784	49.6045	42.1284	43.1774	31.1747	34.5445	24.8711	32.4091	31.5858
ENSAMEG00000001259	GL192522.1	+	1346621	1388410	2193	21	5	13	23	24	6	12	3	9	8	509	544	809	795	841	130	175	219	221	177	8	10	51	24	17	0.5617	0.148604	0.359457	0.625952	0.617771	0.146724	0.270802	0.07357	0.25769	0.170598	16.9389	18.4459	27.1544	24.0073	22.0521	3.65566	6.06859	7.26152	6.90146
ENSAMEG00000001260	GL193892.1	+	378552	388382	1152	20	5	38	17	24	25	6	30	3	58	110	66	187	115	179	42	44	136	54	98	37	12	68	19	41	1.01836	0.28289	2.0002	0.880742	1.17602	1.16379	0.257755	1.40051	0.163517	2.3545	6.96863	4.2602	11.9487	6.61089	8.93495	2.24832	2.90461	8.58437	3.21018
ENSAMEG00000001261	GL193557.1	-	12905	15669	1227	31	24	57	36	36	58	24	38	31	85	88	57	130	150	152	71	95	137	106	130	61	69	123	59	83	1.48197	1.27487	2.81691	1.7511	1.6562	2.53496	0.968	1.66555	1.5864	3.23965	5.23414	3.45437	7.79882	8.09582	7.12346	3.56841	5.88799	8.11892	5.91628
ENSAMEG00000001262	GL193080.1	-	468823	490569	1506	578	287	465	332	477	467	473	511	293	609	850	594	869	688	1139	817	575	867	581	894	751	730	923	415	828	22.5126	12.421	18.7228	13.1573	17.8792	16.6295	15.5434	18.248	12.2162	18.9111	41.1909	29.3292	42.4742	30.2536	43.4901	33.4548	29.0356	41.8616	26.4204
ENSAMEG00000001263	GL193557.1	+	48753	52621	1461	257	197	191	150	202	459	287	288	183	315	11	10	11	8	17	57	15	15	10	54	1295	1732	1012	228	1053	10.3183	8.78853	7.9273	6.12764	7.8047	16.8481	9.72166	10.6013	7.86494	10.0829	0.549477	0.508966	0.554208	0.362622	0.669099	2.40594	0.780781	0.746557	0.468746
ENSAMEG00000001264	GL192667.1	+	1044840	1053870	1014	293	135	240	302	223	463	1472	48	1192	753	821	745	1715	994	996	2422	1281	3792	2097	2666	1713	1241	3280	3063	2507	16.9494	8.67753	14.3521	17.7755	12.4143	24.4867	71.842	2.54578	73.813	34.7281	59.0898	54.6333	124.496	64.9176	56.4824	147.298	96.0725	271.927	141.628
ENSAMEG00000001265	GL193431.1	-	223060	228499	732	28	14	12	3	13	10	3	1	0	3	22	10	10	1	10	77	12	43	18	60	308	111	106	20	160	2.24373	1.24657	0.994059	0.244603	1.00251	0.732617	0.202824	0.0734695	0	0.191661	2.1934	1.01585	1.00559	0.0904697	0.785562	6.48695	1.24669	4.27149	1.68403
ENSAMEG00000001266	GL194071.1	+	62478	63111	255	0	0	0	0	0	0	0	0	0	0	1	0	0	6	2	0	3	2	0	0	0	0	1	0	0	0	0	0	0	0	0	0	0	0	0	0.286198	0	0	1.55821	0.451005	0	0.894683	0.570311	0
ENSAMEG00000001267	GL192534.1	-	1363541	1484733	1605	200	118	137	113	138	415	165	60	159	409	214	145	207	157	271	392	251	272	320	419	243	158	259	121	299	7.30935	4.79189	5.17592	4.20199	4.85354	13.8663	5.08765	2.01046	6.22037	11.9171	9.73074	6.71787	9.49348	6.47797	9.70926	15.0616	11.8929	12.323	13.6541
ENSAMEG00000001268	GL193376.1	-	447401	727448	2145	2	1	0	2	1	0	0	0	0	0	3	4	5	2	0	2	0	0	1	1	4	6	0	24	5	0.0546923	0.030386	0	0.0556487	0.0263165	0	0	0	0	0	0.102071	0.138667	0.171583	0.0617472	0	0.0574994	0	0	0.0319272
ENSAMEG00000001269	GL193978.1	+	159463	163783	213	4938	3509	12631	7458	10372	3266	8469	19381	7552	11681	3033	2887	9919	6574	13097	3176	2146	10565	3952	5317	3708	7844	8267	13695	9122	1359.86	1073.75	3595.84	2089.75	2748.77	822.289	1967.71	4893.45	2226.26	2564.63	1039.2	1007.87	3427.82	2043.92	3535.77	919.521	766.193	3606.72	1270.65
ENSAMEG00000001270	GL194071.1	+	152346	219110	1474	0	1	0	0	0	0	0	0	0	0	0	2	1	2	0	1	1	0	0	0	0	3	0	0	0	0	0.0442184	0	0	0	0	0	0	0	0	0	0.100895	0.0499382	0.0898559	0	0.0418373	0.051593	0	0
ENSAMEG00000001271	GL192911.1	-	964601	993736	6522	6	8	20	6	14	5	0	10	0	4	14	10	10	5	17	8	1	20	2	12	23	20	46	6	63	0.0539628	0.0799483	0.185948	0.0549064	0.121172	0.0411128	0	0.0824589	0	0.0286816	0.156659	0.114014	0.112862	0.0507696	0.149886	0.0756432	0.0116602	0.222983	0.0210008
ENSAMEG00000001272	GL192819.1	-	988281	1048525	1203	151	121	131	105	99	1250	933	114	874	998	420	519	332	492	389	591	648	448	620	716	1013	800	1108	268	853	7.36266	6.55571	6.6031	5.20926	4.64541	55.7227	38.3817	5.09633	45.6184	38.7961	25.4795	32.0805	20.3143	27.0841	18.5941	30.2958	40.9635	27.0791	35.295
ENSAMEG00000001273	GL193502.1	+	374242	386908	1617	351	1073	243	711	247	231	513	31	529	177	767	742	644	736	807	458	587	593	591	468	414	333	419	295	383	12.7327	43.2504	9.11252	26.2429	8.62267	7.66108	15.7006	1.03103	20.5419	5.11902	34.6172	34.1219	29.3161	30.1427	28.6982	17.4669	27.6068	26.6665	25.0302
ENSAMEG00000001274	GL193978.1	+	176375	203795	1497	79	28	26	16	45	933	388	302	215	373	56	53	28	32	43	61	47	44	35	34	1239	1028	556	142	712	3.09549	1.21909	1.05316	0.637897	1.69686	33.4232	12.8268	10.8493	9.01802	11.6523	2.73007	2.63265	1.37679	1.41561	1.65173	2.51286	2.38761	2.13724	1.60116
ENSAMEG00000001275	GL192911.1	+	1047591	1090861	2163	362	241	300	287	308	572	648	86	582	566	584	528	427	664	665	428	557	569	576	595	728	305	738	475	1017	9.81693	7.26207	8.41021	7.91913	8.03802	14.1817	14.8261	2.13826	16.8951	12.2372	19.7044	18.1517	14.5312	20.3295	17.679	12.2025	19.5833	19.1284	18.237
ENSAMEG00000001276	GL193557.1	-	58273	343830	807	386	146	153	82	145	173	138	103	104	94	289	299	173	210	270	725	281	165	292	323	305	279	181	136	196	40.8697	17.1768	16.7465	8.83398	14.7745	16.7465	12.3276	9.99875	11.7874	7.93491	38.0711	40.1329	22.9862	25.1029	28.025	80.7029	38.5731	21.6569	36.0961
ENSAMEG00000001277	GL192373.1	-	3701785	3714151	585	279	214	193	305	216	662	839	715	454	693	1410	1323	1228	2300	1767	2025	1200	2270	1253	2092	1455	1200	1728	790	1518	27.9751	23.8428	20.0052	31.1169	20.8426	60.6862	70.9765	65.7307	48.7298	55.3989	175.902	168.168	154.516	260.367	173.689	213.467	155.996	282.158	146.684
ENSAMEG00000001278	GL193431.1	+	251361	259436	930	93	47	64	62	81	138	42	22	44	56	213	224	217	180	176	276	138	184	167	233	310	319	218	114	226	5.86575	3.29394	4.17291	3.97888	4.91651	7.95763	2.23499	1.27221	2.97074	2.81597	16.7149	17.9103	17.1754	12.8175	10.8823	18.3015	11.2846	14.3866	12.2976
ENSAMEG00000001279	GL193557.1	+	159872	243809	2922	246	166	263	170	206	358	490	44	354	203	614	556	523	551	536	591	822	730	808	592	818	851	726	765	627	4.93831	3.70278	5.4578	3.47233	3.97962	6.57038	8.29898	0.809824	7.60707	3.24892	15.3354	14.1493	13.175	12.4878	10.5481	12.4729	21.3934	18.1662	18.9373
ENSAMEG00000001280	GL192667.1	-	1064766	1065595	771	0	0	1	0	1	1	0	2	0	1	8	2	10	4	11	3	11	18	7	6	0	0	2	1	2	0	0	0.078648	0	0.0732151	0.0695558	0	0.139506	0	0.0606554	0.757256	0.192892	0.95472	0.343574	0.820408	0.239954	1.08499	1.69762	0.621772
ENSAMEG00000001281	GL195348.1	+	27928	31156	1272	69	10	32	18	79	15	19	10	20	25	236	220	570	321	465	245	146	289	205	393	28	60	47	470	37	3.18189	0.512405	1.52547	0.844574	3.50586	0.6324	0.739222	0.422796	0.987273	0.919129	13.5404	12.861	32.9851	16.7121	21.0212	11.8779	8.72879	16.5209	11.0371
ENSAMEG00000001282	GL192369.1	+	489122	491057	708	134	68	51	65	70	767	720	201	521	484	104	53	67	51	112	103	68	93	59	76	293	418	229	361	248	11.1018	6.26002	4.36796	5.47939	5.5811	58.0965	50.3278	15.268	46.2061	31.9695	10.7203	5.56649	6.96581	4.77036	9.09654	8.97149	7.30405	9.5515	5.70698
ENSAMEG00000001283	GL192667.1	+	1074349	1093446	1014	613	127	228	374	415	780	3153	169	2124	1608	4907	4013	5755	7783	8576	6640	3294	5606	4131	9856	798	623	1608	1718	1148	35.4606	8.1633	13.6345	22.0133	23.1028	41.252	153.884	8.96328	131.526	74.1603	353.171	294.286	417.77	508.304	486.338	403.823	247.044	402.01	279
ENSAMEG00000001284	GL192522.1	+	1529161	1592991	1548	780	730	793	848	674	1079	1269	832	1104	1127	1550	1870	1492	2387	2086	2156	3967	2506	4873	2493	988	1146	1106	2751	1123	29.5561	30.7363	31.0631	32.6947	24.5778	37.3799	40.5695	28.9048	44.7809	34.0468	73.0748	89.8276	70.946	102.116	77.4881	85.8892	194.885	117.715	215.582
ENSAMEG00000001285	GL195257.1	-	12062	50203	549	1	0	0	0	0	0	3	0	0	0	0	1	0	0	0	30	13	5	15	15	196	93	117	3	96	0.106844	0	0	0	0	0	0.270432	0	0	0	0	0.135446	0	0	0	3.36984	1.80077	0.662247	1.87114
ENSAMEG00000001286	GL196172.1	-	324	3042	927	0	0	0	0	0	0	0	0	0	0	0	0	0	0	0	0	0	0	0	0	0	0	0	0	0	0	0	0	0	0	0	0	0	0	0	0	0	0	0	0	0	0	0	0
ENSAMEG00000001287	GL193502.1	-	387290	443147	4356	313	901	340	753	248	323	1113	26	1057	183	971	712	972	690	861	433	501	804	732	551	396	178	389	271	333	4.21483	13.4815	4.73296	10.3171	3.2138	3.97651	12.6449	0.320999	15.2364	1.96466	16.2682	12.1543	16.4251	10.49	11.366	6.13001	8.74657	13.4212	11.5083
ENSAMEG00000001288	GL195389.1	+	30287	45986	639	1	0	1	4	5	0	0	0	0	1	0	1	0	0	4	20	18	122	0	51	4	0	8	0	6	0.0917958	0	0.0948946	0.373604	0.441697	0	0	0	0	0.0731851	0	0.116369	0	0	0.359957	1.93015	2.1422	13.8829	0
ENSAMEG00000001289	GL197293.1	+	1	2360	921	37	41	55	33	47	35	22	26	17	51	116	70	95	99	159	99	48	138	68	120	105	40	105	32	102	1.68504	2.07476	2.58934	1.52915	2.05986	1.45727	0.845309	1.08561	0.828757	1.85173	6.57278	4.0413	5.42923	5.09019	7.0986	4.74002	2.83409	7.79086	3.6156
ENSAMEG00000001290	GL192373.1	-	3751517	3756769	1434	35	4	16	25	49	1	1	4	4	3	752	113	313	175	1268	557	116	323	77	632	25	7	65	62	33	1.43167	0.181807	0.67657	1.0405	1.92887	0.0373972	0.0345112	0.150013	0.175148	0.0978353	38.2715	5.8596	16.0667	8.08171	50.8466	23.9534	6.15173	16.3786	3.6773
ENSAMEG00000001291	GL193275.1	-	48143	70547	507	2	0	0	0	2	3	0	3	0	7	0	0	0	0	2	0	0	3	0	1	0	0	0	0	0	0.231391	0	0	0	0.222678	0.317323	0	0.318223	0	0.645675	0	0	0	0	0.226837	0	0	0.430264	0
ENSAMEG00000001292	GL193275.1	-	188296	498184	1496	87	88	75	86	67	0	4	1	2	1	3	4	1	6	10	0	3	0	1	5	306	102	262	52	316	3.41123	3.83399	3.03999	3.43099	2.52812	0	0.132324	0.035949	0.0839446	0.0312602	0.146351	0.198823	0.0492038	0.265604	0.384379	0	0.152503	0	0.0457779
ENSAMEG00000001293	GL192369.1	+	493617	526533	5250	532	852	901	702	652	186	120	13	111	126	729	848	767	677	600	780	1318	1681	1197	844	893	637	1330	429	661	5.94396	10.5774	10.4066	7.9805	7.01041	1.89995	1.13118	0.133169	1.32757	1.12237	10.1339	12.0109	10.7539	8.53972	6.57179	9.16212	19.0917	23.2825	15.6143
ENSAMEG00000001294	GL194606.1	+	81259	177778	4215	50	20	40	17	71	43	13	17	11	81	105	85	147	96	210	94	50	197	57	141	56	15	144	30	100	0.695819	0.309266	0.575446	0.240715	0.950858	0.54709	0.152635	0.216905	0.163866	0.898692	1.81802	1.49955	2.56714	1.5083	2.86493	1.37528	0.902112	3.39853	0.926115
ENSAMEG00000001295	GL193431.1	+	275280	437169	3501	911	754	489	616	498	783	575	41	442	360	1128	1135	977	904	964	1471	1288	1039	1166	1111	1292	1248	1113	830	892	15.2634	14.0372	8.46952	10.5012	8.02957	11.9938	8.12801	0.629811	7.92729	4.80877	23.5139	24.107	20.5415	17.0998	15.8335	25.9108	27.9777	21.5797	22.8084
ENSAMEG00000001296	GL193070.1	-	159523	457866	11382	8619	2461	1735	2235	2899	1	0	0	0	0	3	0	0	1	1	1	0	2	1	0	0	0	0	0	1	46.0362	14.606	9.57988	12.1464	14.9012	0.00488322	0	0	0	0	0.0199364	0	0	0.00603022	0.00523613	0.00561538	0	0.0132425	0.006236
ENSAMEG00000001297	GL194619.1	-	13928	15690	966	0	0	0	0	0	0	0	0	0	0	0	0	0	0	0	0	0	0	0	0	0	0	0	0	0	0	0	0	0	0	0	0	0	0	0	0	0	0	0	0	0	0	0	0
ENSAMEG00000001298	GL192819.1	-	1071220	1103361	2643	444	231	486	362	371	283	195	59	173	265	763	647	772	932	1001	720	756	959	921	850	538	348	729	519	643	9.85393	5.69659	11.1502	8.17454	7.92377	5.74218	3.65129	1.20053	4.11001	4.68891	21.0685	18.2031	21.5006	23.3525	21.7785	16.7995	21.7527	26.3842	23.8644
ENSAMEG00000001299	GL193080.1	-	495163	497327	843	252	113	102	119	143	78	73	33	58	65	235	233	241	251	224	400	124	185	183	320	146	176	188	213	147	17.5346	8.73677	7.33694	8.42503	9.57554	4.96198	4.28552	2.10526	4.32011	3.60586	20.3445	20.5526	21.0436	19.7179	15.2796	29.2613	11.1862	15.9576	14.8666
ENSAMEG00000001300	GL194619.1	+	67131	68809	954	0	0	0	0	0	0	0	0	0	0	0	0	0	0	0	0	0	0	0	0	0	0	0	0	0	0	0	0	0	0	0	0	0	0	0	0	0	0	0	0	0	0	0	0
ENSAMEG00000001301	GL192810.1	+	986900	1010521	5838	10	0	0	0	18	17	0	0	0	17	22	0	2	0	23	26	0	0	0	64	24	0	0	0	17	0.100475	0	0	0	0.174046	0.156161	0	0	0	0.136178	0.275021	0	0.0252172	0	0.226545	0.274644	0	0	0
ENSAMEG00000001302	GL192626.1	+	15399	17031	411	15	11	56	162	2	8	2	24	61	3	54	5	102	7	166	20	58	3	106	119	141	63	58	233	9	2.14079	1.74442	8.26206	23.5248	0.27469	1.04385	0.240822	3.14042	9.31928	0.341352	9.58868	0.904622	18.2679	1.1279	23.2251	3.00088	10.7318	0.530764	17.6625
ENSAMEG00000001303	GL192637.1	+	309331	495112	5454	26	27	23	62	34	0	1	0	1	0	503	30	97	31	566	37	43	45	13	24	7	9	41	4	8	0.280452	0.323612	0.256467	0.680463	0.352935	0	0.00910059	0	0.0115466	0	6.7505	0.410224	1.31299	0.377517	5.98507	0.419588	0.601336	0.601721	0.163716
ENSAMEG00000001304	GL192626.1	+	163508	172610	642	144	77	171	78	111	87	133	234	91	210	90	75	63	65	129	145	106	257	140	162	105	87	140	65	175	13.1568	7.81728	16.1511	7.25123	9.75984	7.26728	10.2524	19.6019	8.90022	15.2971	10.2309	8.68691	7.2233	6.70491	11.5544	13.9282	12.5562	29.1085	14.9341
ENSAMEG00000001305	GL192626.1	+	200068	200785	369	0	0	0	0	0	1	1	0	0	0	0	0	1	1	0	0	1	1	1	2	1	0	0	0	1	0	0	0	0	0	0.145727	0.134481	0	0	0	0	0	0.200024	0.179956	0	0	0.206652	0.197594	0.186097
ENSAMEG00000001306	GL192534.1	-	1636957	1663864	861	950	567	1007	687	1182	630	695	509	489	1734	1329	977	1885	1625	3158	1613	1306	2532	1479	2696	757	644	1352	883	1583	64.7208	42.922	70.92	47.6218	77.4942	39.2397	39.9476	31.7931	35.6615	94.1824	112.649	84.3782	161.153	124.987	210.912	115.529	115.353	213.837	117.639
ENSAMEG00000001307	GL192626.1	-	210723	250840	846	25	5	16	4	16	4	4	7	8	16	13	11	20	7	25	19	14	29	11	26	5	5	29	12	22	1.73338	0.385212	1.14681	0.28219	1.06759	0.253558	0.233991	0.444986	0.593764	0.88445	1.12145	0.966855	1.74016	0.547951	1.69927	1.38498	1.25848	2.49258	0.890451
ENSAMEG00000001308	GL193080.1	+	506476	515512	762	329	312	417	381	388	315	289	530	282	545	429	339	544	455	797	448	348	540	478	650	390	472	446	595	615	25.3259	26.687	33.1836	29.8416	28.743	22.1689	18.7694	37.4058	23.2375	33.4476	41.0875	33.0814	52.5502	39.5431	60.1444	36.2563	34.7306	51.5301	42.9596
ENSAMEG00000001309	GL194810.1	-	18383	63337	1386	21	26	41	48	20	145	226	34	216	124	228	163	250	167	260	98	172	163	167	150	77	40	128	57	63	0.88875	1.22267	1.79375	2.06695	0.814557	5.61038	8.06963	1.31927	9.78554	4.18391	12.0055	8.74507	13.2772	7.97935	10.787	4.36037	9.43742	8.55158	8.25165
ENSAMEG00000001310	GL193557.1	+	315431	362068	1125	4	19	0	32	3	9	68	10	38	8	45	1309	48	2226	35	74	839	219	624	62	171	137	99	90	79	0.20856	1.10078	0	1.69766	0.15053	0.42902	2.99134	0.478042	2.12093	0.332553	2.91922	86.5219	3.14065	131.035	1.78899	4.05639	56.715	14.1551	37.9856
ENSAMEG00000001311	GL192626.1	+	256485	275800	855	75	71	69	75	80	35	37	39	31	25	79	65	124	95	105	84	126	131	130	119	61	67	143	88	90	5.1454	5.41243	4.89356	5.23537	5.28176	2.19528	2.14163	2.45311	2.27662	1.36741	6.74323	5.65309	10.6754	7.3582	7.06179	6.05862	11.2071	11.1411	10.4127
ENSAMEG00000001312	GL193070.1	+	31642	931406	5313	336	134	248	1353	1177	22	9	2	7	42	304	99	277	106	334	95	112	198	18	84	43	19	35	470	53	3.30631	1.46516	2.52275	13.5466	11.1458	0.197921	0.0747192	0.0180439	0.0737349	0.329499	3.72187	1.23497	3.42051	1.17761	3.22195	0.9828	1.42885	2.41528	0.206795
ENSAMEG00000001313	GL192647.1	+	356400	358880	192	0	0	0	0	0	0	0	0	0	0	0	1	0	0	1	50	46	67	1	38	0	0	0	0	0	0	0	0	0	0	0	0	0	0	0	0	0.387291	0	0	0.299496	16.0594	18.2198	25.3744	0.356686
ENSAMEG00000001314	GL192534.1	-	1754318	1833216	4200	8	6	6	76	15	985	1178	54	819	1484	500	197	741	326	776	796	215	486	239	1082	728	431	1505	553	1113	0.113595	0.0946665	0.0880721	1.09802	0.20497	12.787	14.1123	0.703003	12.4487	16.7997	8.83328	3.54609	13.2036	5.22609	10.8019	11.8828	3.95796	8.55467	3.96214
ENSAMEG00000001315	GL192647.1	+	367995	368553	174	1	0	0	0	0	0	0	0	0	0	4	4	11	2	11	13	14	43	0	21	1	0	1	0	0	0.337112	0	0	0	0	0	0	0	0	0	1.67771	1.70942	4.65344	0.761193	3.63526	4.60739	6.11881	17.9697	0
ENSAMEG00000001316	GL193978.1	+	217446	238219	1821	0	0	1	2	1	11	9	0	8	10	4	0	0	0	1	164	132	305	5	127	95	43	62	2	65	0	0	0.0332991	0.0655499	0.0309988	0.323944	0.244591	0	0.275851	0.256811	0.160309	0	0	0	0.0315778	5.55386	5.51254	12.179	0.188039
ENSAMEG00000001317	GL192647.1	-	373257	376902	492	140	39	72	56	101	82	36	164	44	64	97	43	158	41	182	103	34	85	41	120	83	73	167	58	135	16.6912	5.16654	8.8738	6.79321	11.5881	8.93792	3.62115	17.9266	5.61542	6.08329	14.3884	6.49894	23.6386	5.51865	21.2715	12.9102	5.25535	12.5625	5.70698
ENSAMEG00000001318	GL192819.1	-	1166277	1168221	1365	843	119	235	153	552	197	130	34	94	101	337	371	327	343	362	301	97	139	180	277	301	274	201	47	257	36.2258	5.68217	10.4394	6.68977	22.8277	7.73965	4.71324	1.33957	4.32404	3.46029	18.0179	20.2106	17.6338	16.6409	15.2499	13.5986	5.40415	7.40465	9.03082
ENSAMEG00000001319	GL192647.1	+	378497	428109	6027	1012	574	880	686	868	1022	685	78	687	818	2771	2085	2676	2310	2901	1864	1975	2329	2211	2206	1088	834	1494	1285	1027	9.84925	6.20742	8.85368	6.79321	8.12968	9.09364	5.62468	0.696004	7.15731	6.34711	33.5539	25.7243	32.6825	25.382	27.6782	19.0724	24.9203	28.099	25.1232
ENSAMEG00000001320	GL192819.1	+	1233786	1304980	4758	883	395	622	510	606	1453	1382	23	1000	694	2087	2368	1300	1755	1913	3051	1280	1332	1421	1937	1729	916	1219	1530	956	12.0509	5.99006	8.77538	7.082	7.95905	18.1296	15.9129	0.287793	14.6093	7.55121	35.4375	40.9689	22.2642	27.0411	25.5941	43.7761	22.6481	22.5351	22.642
ENSAMEG00000001321	GL192667.1	+	1104459	1121396	1191	6	2	1	1	5	6	17	12	13	17	50	38	82	68	54	23	12	125	14	70	6	7	9	4	3	0.295504	0.109451	0.0509132	0.0501118	0.236981	0.270164	0.706392	0.541861	0.685371	0.667515	3.06383	2.37252	5.06795	3.78104	2.6072	1.1909	0.766227	7.63168	0.805015
ENSAMEG00000001322	GL193080.1	-	521049	534797	666	3	0	3	8	3	1	0	0	0	0	2	0	0	0	0	2	1	0	4	0	2	0	1	0	0	0.28246	0	0.291995	0.766397	0.271824	0.0860795	0	0	0	0	0.234287	0	0	0	0	0.197972	0.122068	0	0.439703
ENSAMEG00000001323	GL193557.1	+	391175	428221	2373	37	18	66	69	57	91	193	9	175	69	181	122	154	163	235	193	146	210	175	286	190	96	282	133	257	0.914592	0.494396	1.68651	1.73542	1.35591	2.05651	4.02502	0.203969	4.63057	1.3598	5.56657	3.82297	4.77698	4.54888	5.69458	5.01557	4.67889	6.43493	5.05042
ENSAMEG00000001324	GL192566.1	-	517051	560155	582	192	196	154	261	149	16	8	3	8	16	72	65	28	82	98	129	105	36	159	138	18	18	49	60	33	19.3509	21.9499	16.045	26.7651	14.4517	1.4743	0.680261	0.277215	0.863101	1.28564	9.02852	8.3048	3.54132	9.33051	9.68266	13.6687	13.72	4.49782	18.7095
ENSAMEG00000001325	GL193251.1	+	56611	164774	1337	4	2	4	4	1	3	5	0	8	2	68	13	23	20	82	11	5	11	0	8	3	3	0	1	1	0.17549	0.0974987	0.181414	0.178559	0.0422205	0.120331	0.185075	0	0.37571	0.0699556	3.7118	0.723021	1.26627	0.990633	3.52675	0.507367	0.284398	0.598251	0
ENSAMEG00000001326	GL192522.1	-	1596379	1632009	1062	51	27	47	33	33	88	45	10	43	89	267	247	327	231	391	158	54	171	87	133	626	469	445	93	667	2.81689	1.65706	2.68359	1.85456	1.75406	4.44371	2.09699	0.5064	2.54237	3.91913	18.3482	17.2946	22.6649	14.4046	21.1711	9.17473	3.86685	11.7083	5.61025
ENSAMEG00000001327	GL195354.1	-	1245	19838	879	418	272	347	295	565	379	274	152	293	672	553	358	390	589	699	340	352	635	386	773	222	156	414	298	396	27.894	20.1688	23.9377	20.0302	36.2839	23.1227	15.4266	9.29979	20.9302	35.7523	45.9138	30.2854	32.6592	44.3752	45.7278	23.8534	30.4538	52.5299	30.0736
ENSAMEG00000001328	GL193502.1	+	467918	488296	1914	132	3586	84	1586	59	832	7898	107	4760	371	25	19	32	32	17	130	40	104	19	80	749	687	349	54	501	4.04535	122.115	2.66121	49.4554	1.74006	23.3114	204.213	3.00649	156.156	9.06475	0.953246	0.73816	1.23066	1.10719	0.510739	4.18854	1.5893	3.95106	0.679828
ENSAMEG00000001329	GL193978.1	+	244502	268500	3009	11	4	4	4	3	4	5	0	1	1	5	1	3	1	1	121	157	217	3	79	2	4	5	0	0	0.214434	0.0866439	0.0806083	0.0793396	0.05628	0.0712895	0.082235	0	0.0208676	0.0155418	0.12127	0.0247125	0.0733887	0.0220086	0.0191104	2.47984	3.96794	5.24396	0.0682789
ENSAMEG00000001330	GL195354.1	-	35472	43569	381	116	119	188	163	168	281	182	85	199	434	347	235	345	252	351	266	198	341	277	400	559	484	863	224	972	17.859	20.3574	29.9209	25.5338	24.8908	39.5521	23.6404	11.9981	32.7961	53.2707	66.4678	45.865	66.6537	43.8016	52.9753	43.0544	39.521	65.0806	49.79
ENSAMEG00000001331	GL192566.1	-	964912	1426814	1473	809	655	1048	919	1025	439	552	757	650	574	360	395	470	554	688	472	483	463	608	571	551	821	595	1154	694	32.2158	28.9827	43.142	37.2362	39.2804	15.9827	18.5458	27.6383	27.708	18.2235	17.8364	19.9404	23.4869	24.907	26.8582	19.7606	24.9363	22.856	28.2676
ENSAMEG00000001332	GL193251.1	-	230426	272791	1096	2338	3936	2766	4102	1649	353	548	530	442	458	719	722	1004	1045	1191	871	1206	1165	1322	991	529	682	981	537	747	125.129	234.069	153.033	223.376	84.9308	17.2724	24.7445	26.0066	25.3225	19.5424	47.8768	48.9853	67.43	63.1422	62.4875	49.0082	83.6806	77.2925	82.6054
ENSAMEG00000001333	GL194253.1	-	110024	205050	3390	462	720	375	562	297	304	973	24	807	171	1256	1724	673	1519	919	2582	4034	1674	3847	2566	1667	1531	2431	1935	1217	7.76943	13.4541	6.51924	9.61639	4.80657	4.67396	13.8053	0.370044	14.5275	2.29268	26.2797	36.7536	14.2026	28.84	15.1506	45.65	87.9524	34.898	75.5324
ENSAMEG00000001334	GL193557.1	-	445093	597969	4092	517	540	655	859	452	619	706	11	554	379	2475	1714	1418	1843	2604	2434	1809	1399	1846	2542	1312	613	2411	1638	1449	8.15871	9.46894	10.6854	13.7928	6.86437	8.93071	9.39985	0.159154	9.35862	4.76837	48.5948	34.2892	28.0811	32.8358	40.2847	40.3821	37.0113	27.3683	34.0116
ENSAMEG00000001335	GL192583.1	-	1429570	1446073	1656	120	66	159	83	98	233	157	46	90	149	641	380	413	423	703	534	344	547	342	553	544	196	670	281	556	4.25054	2.59767	5.82209	2.99137	3.34057	7.54542	4.69189	1.49388	3.41253	4.20775	28.2491	17.0633	18.3578	16.9159	24.4111	19.8857	15.7974	24.0187	14.1434
ENSAMEG00000001337	GL192566.1	+	1776990	1930201	1350	70	93	91	115	89	44	78	8	51	57	137	91	90	138	164	129	141	114	144	226	64	33	115	107	65	3.17558	4.68797	4.26761	5.30825	3.8855	1.82491	2.98542	0.332744	2.47666	2.06158	7.73266	5.23337	5.12359	7.06797	7.29352	6.15251	8.29294	6.41104	7.62696
ENSAMEG00000001338	GL193373.1	-	423549	441076	1404	0	2	0	0	0	128	61	120	61	200	85	47	63	56	137	57	3	33	5	78	0	5	2	2	1	0	0.092846	0	0	0	4.88912	2.15016	4.59656	2.72808	6.66172	4.41834	2.48926	3.30296	2.64141	5.61106	2.50362	0.162496	1.70911	0.243888
ENSAMEG00000001339	GL192626.1	-	509531	533611	672	402	329	408	670	589	1161	1825	1984	2138	2246	1499	1220	2522	2257	3097	1629	2041	2049	2884	2447	1030	1151	2021	1607	1767	35.0898	31.91	36.8157	59.5056	49.4767	92.6511	134.401	158.778	199.771	156.302	162.794	134.999	276.252	222.421	265.011	149.49	230.973	221.715	293.909
ENSAMEG00000001340	GL193502.1	+	492159	513770	2046	1751	1898	1629	1910	1518	2487	2893	1058	2579	2059	2301	2117	2689	2271	3071	2234	1926	2034	2105	2258	2710	3526	3668	2249	3018	50.2001	60.4631	48.2789	55.716	41.8814	65.1866	69.9764	27.8098	79.148	47.0624	82.0763	76.9404	96.7421	73.5065	86.3109	67.3346	71.5878	72.2882	70.4586
ENSAMEG00000001341	GL192522.1	+	1644109	1646234	339	3334	2582	2893	2307	3176	659	603	812	426	813	619	668	851	691	1001	1136	539	1238	791	985	1519	1673	1384	1137	1707	576.885	496.429	517.477	406.163	528.854	104.249	88.0291	128.817	78.905	112.154	133.259	146.526	184.782	134.987	169.795	206.652	120.914	265.548	159.795
ENSAMEG00000001342	GL192522.1	+	1803268	1808152	546	603	1333	271	1314	224	494	1564	43	1209	487	251	928	287	1108	267	193	2908	672	2192	126	246	1347	182	500	367	64.7811	159.125	30.0967	143.633	23.1585	48.5202	141.76	4.2354	139.036	41.7119	33.5497	126.385	38.6919	134.388	28.1197	21.7984	405.033	89.495	274.938
ENSAMEG00000001343	GL192534.1	-	1966312	1999778	537	1197	886	1287	1216	1544	25	71	9	61	68	1470	546	1794	816	2800	5788	2052	8152	2869	8805	263	234	286	1902	248	130.751	107.537	145.327	135.149	162.304	2.49663	6.54324	0.901336	7.13263	5.92186	199.779	75.6062	245.911	100.631	299.83	664.684	290.597	1103.85	365.884
ENSAMEG00000001344	GL192453.1	-	1188041	1667519	186	0	0	0	0	0	0	0	0	0	0	0	1	1	1	0	1	1	3	2	4	0	1	0	0	0	0	0	0	0	0	0	0	0	0	0	0	0.221309	0.219074	0.197095	0	0.183536	0.226334	0.649238	0.407641
ENSAMEG00000001345	GL193034.1	+	81907	470933	4779	54	40	15	47	27	140	71	7	73	129	738	259	401	258	1016	442	212	201	258	385	131	34	336	20	100	0.987377	0.812692	0.28353	0.874411	0.475099	2.34035	1.0953	0.11735	1.42884	1.88052	16.7892	6.0035	9.20111	5.32598	18.2117	8.49667	5.02562	4.556	5.50773
ENSAMEG00000001346	GL192709.1	-	109854	229089	1614	0	0	0	0	0	0	1	0	0	0	0	0	0	1	0	2	0	3	0	5	6	3	10	3	8	0	0	0	0	0	0	0.0496877	0	0	0	0	0	0	0.0664898	0	0.123832	0	0.21902	0
ENSAMEG00000001347	GL192534.1	-	2016786	2022698	486	759	198	755	290	691	41	73	5	51	54	794	362	475	513	1353	4130	1079	2799	1344	4709	225	121	203	711	206	91.6071	26.5539	94.2004	35.6134	80.2596	4.52413	7.43353	0.553289	6.58913	5.19614	119.232	55.3874	71.9428	69.9029	160.086	524.052	168.839	418.783	189.387
ENSAMEG00000001348	GL194051.1	-	203449	204701	915	0	0	0	0	0	0	0	0	0	0	0	0	0	0	0	0	0	0	0	0	0	0	0	0	0	0	0	0	0	0	0	0	0	0	0	0	0	0	0	0	0	0	0	0
ENSAMEG00000001349	GL194051.1	+	225714	226794	957	0	0	0	0	0	0	0	0	0	0	0	0	0	0	0	0	0	0	0	0	0	0	0	0	0	0	0	0	0	0	0	0	0	0	0	0	0	0	0	0	0	0	0	0
ENSAMEG00000001350	GL192522.1	-	1856324	1864888	369	3	1	4	6	8	7	33	3	15	9	118	92	139	96	180	302	456	78	519	140	17	14	16	21	9	0.47689	0.176634	0.657318	0.970459	1.22382	1.01732	4.42585	0.437233	2.55246	1.14062	23.3379	18.5396	27.728	17.229	28.0503	50.4709	93.9781	15.3706	96.3227
ENSAMEG00000001351	GL193978.1	-	269819	274052	1212	0	0	0	0	0	0	0	0	0	0	0	0	0	0	0	0	0	0	0	0	1	1	0	0	0	0	0	0	0	0	0	0	0	0	0	0	0	0	0	0	0	0	0	0
ENSAMEG00000001352	GL192522.1	-	1898975	1932333	936	20	11	23	36	33	41	23	51	24	82	88	52	106	82	148	112	84	141	136	180	49	28	99	48	64	1.25337	0.765979	1.49003	2.29551	1.99018	2.34907	1.21608	2.9303	1.61001	4.09696	6.86142	4.13111	8.33605	5.80166	9.09238	7.37909	6.82483	10.9538	9.95063
ENSAMEG00000001353	GL193251.1	-	354339	453482	3255	510	347	492	535	464	426	421	75	386	340	810	630	746	814	1075	807	901	714	1027	964	933	907	1207	780	1102	9.19058	6.9483	9.1655	9.80968	8.04678	7.01853	6.40088	1.23916	7.44613	4.88485	18.1611	14.3922	16.8701	16.561	18.9911	15.2892	21.0505	15.9503	21.6076
ENSAMEG00000001355	GL192386.1	-	2892433	2897257	1038	13	21	21	32	14	11	8	1	14	14	21	23	31	27	17	33	46	67	51	29	71	53	69	37	56	0.734632	1.31863	1.22677	1.83994	0.761352	0.568307	0.381418	0.0518109	0.846886	0.630746	1.47648	1.64767	2.19834	1.72259	0.941767	1.96055	3.37015	4.69353	3.36481
ENSAMEG00000001356	GL194051.1	-	322624	358150	1866	0	0	0	0	0	0	0	0	0	0	0	0	0	0	0	0	0	0	0	0	0	0	0	0	0	0	0	0	0	0	0	0	0	0	0	0	0	0	0	0	0	0	0	0
ENSAMEG00000001357	GL192369.1	-	526890	527805	507	25	5	12	22	25	100	53	37	62	155	143	90	139	102	159	161	70	104	102	177	171	152	229	28	227	2.89238	0.64278	1.43521	2.5898	2.78347	10.5774	5.17341	3.92475	7.67853	14.2971	20.5843	13.2	20.1807	13.3231	18.0335	19.583	10.4997	14.9158	13.7778
ENSAMEG00000001358	GL192667.1	+	1124887	1161524	864	60	34	92	78	76	43	164	171	125	100	141	323	252	595	217	246	385	536	394	398	121	175	287	518	177	4.07344	2.56487	6.45678	5.38807	4.96541	2.66896	9.39375	10.6439	9.08428	5.41265	11.91	27.7989	21.4693	45.6055	14.4423	17.5583	33.8872	45.11	31.2299
ENSAMEG00000001359	GL192583.1	-	1481119	1535073	2903	73	54	73	57	50	47	35	6	41	36	242	221	159	233	275	352	252	259	312	374	211	95	369	136	215	1.47503	1.2124	1.52482	1.17187	0.97225	0.868238	0.596664	0.111153	0.886811	0.579935	6.08381	5.66088	4.03163	5.31524	5.44725	7.4775	6.60148	6.48746	7.36029
ENSAMEG00000001360	GL193978.1	+	324623	336674	1455	566	330	329	269	276	1886	1191	20	855	740	196	250	202	195	151	282	309	293	211	227	2019	2980	3369	503	1283	23.8678	15.4628	14.342	11.5419	11.2005	72.7114	42.3734	0.773252	38.5952	24.8787	10.2834	13.3645	10.6894	9.28371	6.24225	12.5021	16.8935	15.3166	10.3883
ENSAMEG00000001362	GL192369.1	-	528609	535982	1629	1457	911	1383	1325	1236	1073	1333	728	974	1149	2578	2631	2966	3206	3624	2139	2623	2894	3320	2239	1390	1675	1875	1508	1642	52.7881	36.6751	51.7985	48.8451	43.095	35.5419	40.7467	24.1826	37.7752	33.1892	116.21	120.841	134.851	131.139	128.716	81.4751	123.208	129.979	140.436
ENSAMEG00000001363	GL192386.1	+	2900413	2903838	648	711	451	258	362	377	109	115	18	69	71	651	483	422	448	654	777	310	347	345	576	576	217	408	195	414	64.3603	45.363	24.1428	33.3415	32.8414	9.02068	8.78277	1.49388	6.68603	5.12397	73.3184	55.4257	47.9367	45.7844	58.0356	73.9447	36.381	38.9383	36.4613
ENSAMEG00000001364	GL192522.1	+	1932402	1951967	831	189	155	154	219	188	120	161	228	121	145	120	108	156	174	188	239	190	172	230	273	206	185	308	173	279	13.3409	12.1571	11.2373	15.7288	12.7706	7.74405	9.58812	14.7554	9.14279	8.16001	10.5387	9.66411	13.8183	13.8664	13.0091	17.7361	17.3876	15.0505	18.9546
ENSAMEG00000001365	GL192709.1	+	275576	303827	1773	39	8	16	6	43	32	8	15	4	47	73	43	70	89	79	91	45	135	46	145	157	127	299	24	290	1.29027	0.294091	0.547209	0.201974	1.36904	0.967897	0.223301	0.454989	0.141659	1.23969	3.00484	1.80343	2.90616	3.32426	2.56218	3.16514	1.93015	5.53665	1.77679
ENSAMEG00000001366	GL195036.1	-	6901	85152	1734	18	9	12	7	17	5	20	2	20	6	60	71	79	79	72	61	21	32	20	59	8	3	11	20	9	0.523209	0.290684	0.360581	0.207028	0.475535	0.132873	0.490476	0.0533	0.622305	0.139044	2.16989	2.61623	2.88162	2.59251	2.05165	1.8641	0.791382	1.15306	0.678729
ENSAMEG00000001367	GL193373.1	+	464401	472553	276	0	0	0	1	0	12	138	71	85	40	7	10	6	15	5	3	1	5	0	2	5	6	8	8	8	0	0	0	0.216243	0	2.33163	24.7445	13.8346	19.3377	6.77758	1.85096	2.6942	1.60019	3.59912	1.04172	0.670306	0.275536	1.31729	0
ENSAMEG00000001368	GL192730.1	+	29231	47727	549	366	121	138	220	432	62	89	52	76	160	571	335	457	548	935	363	475	337	690	511	135	50	272	249	148	39.105	14.3653	15.2422	23.9168	44.4188	6.0563	8.02281	5.09389	8.69232	13.6292	75.9051	45.3745	61.2737	66.1032	97.9334	40.7751	65.7975	44.6354	86.0725
ENSAMEG00000001369	GL193978.1	+	357891	369146	942	25	20	4	18	13	39	72	5	35	22	284	470	171	536	277	187	182	79	146	161	15	9	4	18	8	1.55673	1.38382	0.257485	1.14044	0.779018	2.22025	3.7826	0.285455	2.33298	1.09218	22.0026	37.101	13.3621	37.6815	16.9091	12.242	14.6929	6.09815	10.6143
ENSAMEG00000001370	GL193373.1	-	479696	480325	594	1	1	5	0	2	0	10	1	5	0	1	3	7	2	0	1	1	4	0	1	3	0	1	2	1	0.09875	0.109727	0.510418	0	0.190063	0	0.833148	0.0905382	0.52854	0	0.122863	0.375555	0.867445	0.222976	0	0.103818	0.128027	0.489661	0
ENSAMEG00000001371	GL193431.1	-	327460	329748	2148	5	0	0	1	1	0	0	0	0	2	1	0	1	0	1	22	71	29	28	46	17	12	11	0	12	0.13654	0	0	0.0277855	0.0262797	0	0	0	0	0.0435431	0.033976	0	0.0342686	0	0.0267706	0.63161	2.51369	0.981716	0.892712
ENSAMEG00000001372	GL192626.1	-	570796	608441	1098	73	56	77	129	89	74	45	27	74	135	218	147	172	269	421	258	287	213	332	392	190	143	392	205	275	3.89982	3.32419	4.25237	7.01196	4.57554	3.61424	2.02824	1.32245	4.23179	5.74983	14.4898	9.95529	11.5307	16.2242	22.0481	14.4903	19.8778	14.1059	20.7073
ENSAMEG00000001373	GL193373.1	+	494701	498945	561	135	81	124	89	205	305	230	284	202	348	170	132	196	120	276	153	46	150	68	191	236	254	266	181	288	14.1154	9.41071	13.403	9.46846	20.6275	29.1558	20.2896	27.2254	22.6091	29.0095	22.1153	17.4965	25.7172	14.1655	28.2903	16.8186	6.23567	19.4424	8.30106
ENSAMEG00000001374	GL193431.1	-	406659	409832	873	1	1	0	0	1	1	0	0	1	0	0	2	1	0	1	1	2	0	1	0	1	0	2	1	0	0.0671907	0.0746596	0	0	0.0646607	0.061429	0	0	0.071925	0	0	0.170355	0.0843172	0	0.0658684	0.0706393	0.174222	0	0.0784464
ENSAMEG00000001375	GL192667.1	+	1175608	1179168	402	501	304	461	621	615	507	1066	458	816	826	1072	1201	1372	2092	2295	1448	1052	1480	1448	2004	726	1124	1150	1103	1332	77.7445	52.4182	73.9522	98.051	91.8414	71.929	139.564	65.1616	135.548	102.191	206.971	236.26	267.173	366.509	349.126	236.231	211.647	284.703	262.34
ENSAMEG00000001376	GL193431.1	-	443441	542534	1023	80	38	60	59	68	92	88	29	70	58	153	200	134	167	158	255	98	201	110	212	111	68	189	117	128	4.5871	2.42107	3.55646	3.44214	3.75222	4.82281	4.25712	1.52455	4.29652	2.6514	10.915	14.5376	9.64183	10.8107	8.88123	15.3718	7.28515	14.287	7.36384
ENSAMEG00000001377	GL193978.1	-	388548	391283	663	17	3	9	6	2	6	7	6	5	4	174	430	193	332	123	468	167	258	222	359	8	16	70	12	12	1.50404	0.294923	0.823135	0.540119	0.170283	0.485317	0.522508	0.486694	0.473534	0.282144	19.1533	48.2274	21.4276	33.1619	10.668	43.5305	19.1554	28.2962	22.9312
ENSAMEG00000001378	GL192647.1	+	433925	463822	2172	383	450	334	485	327	1046	378	18	271	642	570	373	344	318	493	800	874	411	855	746	412	448	408	734	342	10.3434	13.5037	9.32457	13.3271	8.49851	25.8262	8.61273	0.445688	7.83437	13.8229	19.1524	12.7699	11.6581	9.69575	13.0521	22.7139	30.6013	13.7595	26.9584
ENSAMEG00000001379	GL192386.1	-	2997071	3024363	3969	65	29	14	22	23	20	12	2	14	17	243	92	89	70	171	156	137	150	45	127	85	31	90	25	57	0.960629	0.47623	0.213889	0.330821	0.327116	0.270232	0.149627	0.0270999	0.221483	0.200305	4.4682	1.72364	1.65059	1.16797	2.47746	2.42384	2.62499	2.7481	0.77646
ENSAMEG00000001380	GL195430.1	-	16206	39121	1532	2	0	0	0	3	0	0	0	0	0	0	0	0	0	0	1	1	1	0	1	0	1	0	0	0	0.0765764	0	0	0	0.110539	0	0	0	0	0	0	0	0	0	0	0.0402534	0.0496397	0.0474639	0
ENSAMEG00000001381	GL193431.1	+	570729	581316	951	429	140	341	95	213	125	112	23	52	69	362	300	125	210	397	827	443	252	453	575	570	780	363	253	359	26.4606	9.59506	21.7428	5.96204	12.6431	7.04884	5.82836	1.30067	3.43334	3.39307	27.7802	23.4574	9.6752	14.6236	24.005	53.6273	35.4251	19.2682	32.6216
ENSAMEG00000001382	GL192730.1	-	94618	99614	825	20	63	17	389	61	9	33	0	14	11	332	209	366	228	420	241	105	62	111	361	158	127	147	124	210	1.422	4.97722	1.2495	28.1415	4.17379	0.585028	1.97956	0	1.06554	0.623537	29.3691	18.8378	32.6556	18.3019	29.2743	18.0146	9.67884	5.46462	9.21418
ENSAMEG00000001383	GL192842.1	+	15638	385115	393	0	0	0	0	0	0	0	0	0	0	4	2	0	0	1	0	0	0	0	0	1	0	0	0	0	0	0	0	0	0	0	0	0	0	0	0.742804	0.378422	0	0	0.146318	0	0	0	0
ENSAMEG00000001384	GL193502.1	+	528228	530619	1233	9	65	2	5	15	4	2	0	1	2	41	63	41	55	53	3	35	18	4	8	10	5	5	2	2	0.428157	3.43598	0.0983579	0.242024	0.686725	0.173974	0.0802741	0	0.050925	0.0758561	2.42677	3.79941	2.44766	2.95402	2.47175	0.150044	2.1587	1.06153	0.222169
ENSAMEG00000001385	GL193227.1	+	1924	13251	1746	9	6	1	3	10	93	44	7	30	52	61	38	49	29	72	190	17	75	56	156	86	57	79	10	55	0.302358	0.223979	0.0347295	0.102548	0.323304	2.85645	1.24715	0.215612	1.07888	1.39278	2.54972	1.61837	2.06577	1.09994	2.37126	6.71074	0.740445	3.12348	2.1965
ENSAMEG00000001387	GL193373.1	-	517641	519510	513	2	7	0	8	0	6	32	5	20	0	308	359	97	781	472	54	313	65	234	63	10	39	0	28	5	0.228684	0.889367	0	0.930732	0	0.627223	3.08703	0.524169	2.44798	0	43.8168	52.0375	13.9183	100.82	52.9074	6.49138	46.3997	9.21336	31.2382
ENSAMEG00000001388	GL192842.1	+	35503	36833	384	0	0	0	0	0	2	4	1	1	1	0	0	0	0	0	0	0	0	0	0	0	0	0	0	0	0	0	0	0	0	0.27931	0.51551	0.140051	0.163517	0.121785	0	0	0	0	0	0	0	0	0
ENSAMEG00000001389	GL193502.1	+	541217	550234	1380	335	396	343	365	291	365	227	78	143	289	434	386	457	433	544	618	354	598	329	639	393	304	611	206	413	14.2393	18.7032	15.0715	15.7858	11.9033	14.1841	8.14058	3.03972	6.50656	9.7936	22.9518	20.7992	24.3763	20.7789	22.6679	27.6166	19.508	31.5097	16.3269
ENSAMEG00000001390	GL192842.1	+	45309	46073	345	167	142	92	91	77	492	108	7	58	193	17	17	13	5	19	38	15	16	18	27	67	47	56	92	25	28.3936	26.8268	16.17	15.7425	12.5987	76.4775	15.4922	1.09118	10.5561	26.1615	3.59614	3.66411	2.77367	0.959766	3.16684	6.79243	3.30644	3.37228	3.57306
ENSAMEG00000001391	GL192522.1	-	1962094	1966473	270	0	0	0	1	0	0	0	0	0	0	0	0	1	0	0	0	0	0	5	0	0	0	1	0	0	0	0	0	0.221049	0	0	0	0	0	0	0	0	0.272626	0	0	0	0	0	1.26822
ENSAMEG00000001393	GL192709.1	-	315136	381622	3519	680	368	465	379	459	293	213	9	187	144	449	391	325	311	417	1732	961	764	1010	1441	571	204	552	316	482	11.3348	6.81599	8.01264	6.42794	7.36289	4.46515	2.9955	0.137544	3.3367	1.91367	9.31181	8.26221	6.79821	5.85269	6.8141	30.3522	20.7679	15.7869	19.6557
ENSAMEG00000001394	GL192522.1	+	1997372	2020853	1626	68	57	42	97	57	93	38	6	48	120	145	197	175	273	250	67	162	80	166	99	66	13	79	41	75	2.45308	2.28483	1.56629	3.56044	1.97883	3.06726	1.15657	0.198449	1.8536	3.45131	6.5081	9.00917	7.92224	11.1188	8.8412	2.54106	7.57674	3.5776	6.99158
ENSAMEG00000001395	GL192842.1	-	48384	49535	141	321	190	166	87	131	657	155	9	119	267	26	15	29	16	10	51	21	22	30	32	87	70	67	127	70	133.539	87.8283	71.389	36.8258	52.4454	249.882	54.4028	3.43275	52.9935	88.5556	13.4574	7.91063	15.1394	7.51476	4.07824	22.3055	11.3263	11.3456	14.571
ENSAMEG00000001396	GL192842.1	+	51006	54864	276	0	0	2	0	0	0	2	0	1	0	0	0	0	0	0	2	1	0	2	0	0	1	0	4	0	0	0	0.439403	0	0	0	0.358616	0	0.227502	0	0	0	0	0	0	0.446871	0.275536	0	0.496259
ENSAMEG00000001397	GL193431.1	+	688081	691102	507	0	0	0	0	0	0	0	0	0	0	0	0	0	0	0	0	0	0	0	0	0	0	0	0	0	0	0	0	0	0	0	0	0	0	0	0	0	0	0	0	0	0	0	0
ENSAMEG00000001398	GL193373.1	+	203762	585366	1691	37	13	14	20	20	72	33	18	21	55	216	85	140	82	260	76	33	43	24	70	74	28	92	22	86	1.2091	0.47204	0.47294	0.664994	0.628956	2.15108	0.909826	0.539295	0.734597	1.43292	8.78206	3.52122	5.74108	3.02527	8.32915	2.61102	1.3981	1.74191	0.91566
ENSAMEG00000001399	GL192667.1	+	1218908	1220850	1041	1614	1903	1743	2653	1165	1640	3485	1123	2543	1754	3337	8131	3632	10666	3867	2832	11547	6092	9811	2922	2196	3333	2763	5361	2617	92.5447	121.245	103.315	154.78	64.2843	85.9718	168.592	59.0368	156.086	80.1821	238.061	591.027	261.337	690.463	217.365	170.718	858.384	433.018	656.788
ENSAMEG00000001400	GL192842.1	+	59186	62824	471	0	0	0	0	0	0	0	0	0	0	3	1	5	3	2	0	5	2	1	11	0	1	0	0	0	0	0	0	0	0	0	0	0	0	0	0.464844	0.157877	0.781411	0.421808	0.244175	0	0.807304	0.308767	0.145401
ENSAMEG00000001401	GL192842.1	+	64819	65957	321	0	0	0	0	0	0	0	0	0	0	0	0	0	0	0	0	0	0	0	0	0	0	0	0	0	0	0	0	0	0	0	0	0	0	0	0	0	0	0	0	0	0	0	0
ENSAMEG00000001402	GL192842.1	-	68098	69143	255	14	0	1	1	3	31	9	1	15	16	37	23	19	31	38	49	15	31	16	50	11	12	19	5	9	3.22041	0	0.237795	0.234052	0.664104	6.51943	1.74667	0.210901	3.69356	2.93429	10.5893	6.70697	5.48458	8.05074	8.5691	11.85	4.47342	8.83982	4.29702
ENSAMEG00000001403	GL192544.1	-	156933	157390	444	0	0	0	1	0	0	0	0	0	0	0	1	1	0	0	0	0	0	0	0	0	0	0	0	0	0	0	0	0.134422	0	0	0	0	0	0	0	0.167477	0.165786	0	0	0	0	0	0
ENSAMEG00000001404	GL193301.1	+	61591	70783	471	72249	54724	40242	45320	46702	0	1	4	11	0	0	2	11	16	10	3	0	11	25	26	0	1	7	9	17	8997.76	7572.81	5180.85	5742.77	5597.18	0	0.105072	0.456728	1.46645	0	0	0.315753	1.7191	2.24964	1.22087	0.392791	0	1.69822	3.63502
ENSAMEG00000001405	GL192842.1	-	70323	73669	636	20	4	6	5	12	62	18	0	13	32	72	59	37	40	59	88	14	30	17	68	36	26	18	3	20	1.84458	0.409924	0.572053	0.469208	1.06507	5.22784	1.40063	0	1.28345	2.35297	8.26195	6.89817	4.28228	4.16502	5.33441	8.5327	1.67401	3.42994	1.83054
ENSAMEG00000001406	GL192626.1	-	693041	742953	1582	26	6	21	10	46	0	0	0	0	0	5	6	6	4	14	20	35	84	28	33	99	112	294	88	168	0.96403	0.247198	0.804924	0.377264	1.64137	0	0	0	0	0	0.230659	0.282022	0.279174	0.167443	0.508877	0.779622	1.68248	3.86096	1.2121
ENSAMEG00000001407	GL192386.1	+	3028694	3030175	579	444	234	392	415	486	433	446	625	441	493	332	281	478	438	619	480	181	434	333	481	676	853	734	318	807	46.7575	27.3817	42.675	44.4677	49.2534	41.6889	39.6267	60.3453	49.7139	41.3919	43.5001	37.5137	63.1689	52.0755	63.9039	53.1431	24.7122	56.6574	40.9427
ENSAMEG00000001408	GL193251.1	+	553950	558532	675	0	0	0	0	0	18	2	2	0	10	0	0	3	0	1	7	2	1	0	2	1	0	2	0	0	0	0	0	0	0	1.43007	0.146634	0.159347	0	0.692819	0	0	0.327151	0	0.0851899	0.639521	0.225328	0.107725	0
ENSAMEG00000001409	GL192626.1	-	795177	797047	1548	0	0	0	0	0	0	0	0	0	0	0	0	0	0	0	0	0	0	0	0	0	1	0	0	0	0	0	0	0	0	0	0	0	0	0	0	0	0	0	0	0	0	0	0
ENSAMEG00000001410	GL193227.1	-	14392	15116	498	383	56	80	64	174	122	40	13	16	94	952	836	542	455	931	615	122	245	154	391	742	391	420	76	568	45.1121	7.32924	9.74098	7.67013	19.7231	13.1377	3.97502	1.40389	2.01737	8.82718	139.513	124.829	80.1125	60.5057	107.501	76.1564	18.6302	35.7733	21.1777
ENSAMEG00000001411	GL192544.1	-	173482	187177	906	196	64	261	95	407	138	118	284	99	365	185	72	229	134	263	170	63	235	87	286	141	100	280	105	297	12.6897	4.60418	17.4685	6.25817	25.3584	8.16843	6.44559	16.8581	6.86122	18.8403	14.9022	5.9094	18.6053	9.79469	16.6924	11.5713	5.28811	18.8609	6.57625
ENSAMEG00000001412	GL193251.1	-	576269	591562	2169	196	82	152	86	164	266	128	26	104	134	560	325	346	337	534	443	368	333	379	446	259	106	258	167	268	5.30054	2.46408	4.24939	2.36642	4.26815	6.57673	2.92051	0.644662	3.0107	2.88914	18.8424	11.142	11.7421	10.2893	14.1571	12.5952	12.9026	11.1637	11.9665
ENSAMEG00000001413	GL192842.1	-	79325	81636	375	0	0	0	0	1	0	0	0	0	8	0	1	0	3	0	15	29	19	10	57	22	236	0	4	10	0	0	0	0	0.15053	0	0	0	0	0.99766	0	0.198293	0	0.529791	0	2.46673	5.88105	3.68421	1.82623
ENSAMEG00000001414	GL193301.1	-	115931	120061	801	11	6	7	11	11	8	4	3	6	7	22	9	3	7	12	30	52	8	29	14	7	28	7	13	10	0.805534	0.488224	0.529917	0.81962	0.775202	0.535606	0.247136	0.201422	0.470341	0.408685	2.00446	0.835505	0.275689	0.578735	0.86147	2.30967	4.93695	0.726239	2.47944
ENSAMEG00000001415	GL193227.1	-	23115	41169	1335	1344	1105	851	964	712	560	946	79	681	317	1761	2211	1228	2167	1835	1937	1717	1200	1755	1225	862	1060	621	1116	626	59.053	53.9487	38.6536	43.0971	30.106	22.4954	35.0686	3.18247	32.0302	11.1046	96.2687	123.153	67.7092	107.496	79.0399	89.4765	97.8086	65.3615	90.0292
ENSAMEG00000001416	GL192842.1	+	82471	395288	4551	242	99	46	47	33	194	195	7	136	55	158	142	40	53	57	1579	1283	385	1444	625	186	97	84	80	79	4.43182	2.01455	0.870849	0.875776	0.581583	3.24812	3.01291	0.117533	2.6661	0.803026	3.60004	3.29663	0.919249	1.0958	1.02332	30.4009	30.462	8.74029	30.8743
ENSAMEG00000001417	GL192730.1	+	179029	180346	1287	0	0	0	0	0	0	0	0	0	0	0	0	0	0	0	0	0	2	0	0	0	0	0	0	0	0	0	0	0	0	0	0	0	0	0	0	0	0	0	0	0	0	0.112999	0
ENSAMEG00000001418	GL192583.1	+	1541902	1578907	2127	25	5	8	10	7	14	2	1	0	2	83	84	52	41	53	106	27	78	33	57	20	7	9	9	8	0.689439	0.153215	0.228068	0.280598	0.185774	0.352979	0.0465341	0.0252843	0	0.043973	2.84785	2.93664	1.79956	1.27653	1.43285	3.07326	0.965349	2.66655	1.06251
ENSAMEG00000001419	GL192544.1	+	206638	383479	1170	10	8	21	17	34	23	36	19	36	34	28	23	84	32	94	37	26	71	21	70	106	115	156	41	271	0.501346	0.445661	1.08837	0.867192	1.64039	1.05422	1.52274	0.873345	1.93202	1.35899	1.74654	1.46178	5.28474	1.81125	4.61991	1.95019	1.68996	4.4126	1.2292
ENSAMEG00000001420	GL193502.1	-	581825	583475	477	1	5	3	1	4	1	0	0	0	2	7	1	7	0	10	8	5	8	4	11	6	5	25	5	9	0.122972	0.683206	0.381369	0.125122	0.473365	0.112427	0	0	0	0.196081	1.07099	0.155891	1.08021	0	1.20552	1.03427	0.797149	1.21953	0.574287
ENSAMEG00000001421	GL193301.1	-	211838	231178	2190	117	56	81	93	76	194	313	123	223	132	599	421	790	398	674	501	363	380	342	439	950	2274	725	409	799	3.13376	1.66665	2.24276	2.53449	1.95895	4.75057	7.07309	3.0205	6.39374	2.81873	19.9613	14.2948	26.553	12.0352	17.6973	14.1076	12.6052	12.6172	10.6947
ENSAMEG00000001422	GL193448.1	-	396282	400607	999	0	0	0	0	0	0	0	0	0	0	11	1	16	0	17	0	4	11	2	9	87	36	147	31	241	0	0	0	0	0	0	0	0	0	0	0.803589	0.0744344	1.17892	0	0.978532	0	0.304497	0.800662	0.137105
ENSAMEG00000001423	GL194421.1	+	17330	158187	3102	64	69	86	38	22	29	40	3	22	30	10	5	7	9	11	45	31	46	38	54	29	13	67	1	30	1.15938	1.3889	1.61051	0.700421	0.383531	0.480296	0.611353	0.0498268	0.426619	0.433279	0.225388	0.114824	0.15913	0.184069	0.195347	0.857031	0.72807	1.03301	0.8037
ENSAMEG00000001424	GL192667.1	-	1234421	1241936	3264	1408	1423	847	1215	824	462	394	27	270	186	672	492	476	360	447	929	367	474	378	717	336	501	234	413	161	25.3032	28.4155	15.7353	22.2166	14.2506	7.59066	5.97386	0.444869	5.19407	2.66493	15.0254	11.2087	10.7346	7.3041	7.87497	17.552	8.55075	10.5597	7.93102
ENSAMEG00000001425	GL192522.1	+	2052130	2087004	1068	28	3	0	8	12	9	5	0	3	20	157	62	36	52	225	45	17	11	9	43	48	12	65	9	56	1.53784	0.183084	0	0.447065	0.634257	0.451917	0.23169	0	0.176378	0.875755	10.7284	4.31677	2.4812	3.22438	12.1144	2.59838	1.2105	0.748934	0.57711
ENSAMEG00000001426	GL192626.1	+	872950	1275608	1740	10	1	4	124	49	4478	3144	550	2557	3599	193	157	198	146	171	1595	368	432	420	1236	1984	1791	2123	764	1389	0.337112	0.0374585	0.139397	4.25329	1.58965	138.014	89.4215	16.9993	92.2733	96.7289	8.09497	6.70949	8.37618	5.55671	5.65117	56.5291	16.0837	18.0533	16.5306
ENSAMEG00000001427	GL192386.1	-	3030726	3034496	1704	1728	1427	1512	1462	1240	473	686	267	598	363	4356	4347	3873	3650	3996	2438	3507	3817	3922	1843	1810	2668	2053	1959	1630	59.4837	54.5826	53.8052	51.2071	41.0778	14.886	19.9234	8.42675	22.0357	9.96232	186.563	189.696	167.305	141.853	134.849	88.2318	156.514	162.883	157.625
ENSAMEG00000001428	GL192544.1	-	255156	305764	585	98	20	48	79	319	2	0	0	0	9	410	37	375	75	827	388	57	135	21	539	10	13	99	47	35	9.82639	2.2283	4.97539	8.05978	30.7815	0.183342	0	0	0	0.719466	51.1488	4.70311	47.1852	8.49023	81.2908	40.9013	7.40981	16.7803	2.45839
ENSAMEG00000001429	GL193448.1	+	515356	569843	1380	151	71	139	108	149	159	212	347	158	255	1012	471	795	627	1627	470	273	663	232	552	644	774	947	416	839	6.41832	3.35335	6.1077	4.67086	6.09484	6.17883	7.60266	13.5229	7.18906	8.64141	53.5191	25.3794	42.4051	30.0887	67.7954	21.0029	15.0443	34.9347	11.5132
ENSAMEG00000001430	GL193502.1	+	594837	609904	1440	179	139	139	109	146	181	115	130	67	130	222	276	226	204	206	256	318	320	235	251	425	449	451	92	349	7.29145	6.29148	5.85322	4.51769	5.72328	6.74068	3.95225	4.85511	2.92151	4.22187	11.2512	14.2523	11.5525	9.38171	8.22615	10.9632	16.7939	16.1588	11.1762
ENSAMEG00000001431	GL193251.1	+	664710	785505	1413	160	130	151	239	142	78	136	58	100	113	283	205	274	317	472	288	330	327	335	363	159	189	345	296	243	6.64204	5.99655	6.48003	10.095	5.67285	2.96033	4.76327	2.20752	4.44378	3.7399	14.6168	10.7882	14.2738	14.857	19.2084	12.5693	17.7607	16.8278	16.2364
ENSAMEG00000001432	GL192626.1	+	1366731	1562130	1770	59	63	40	114	54	284	189	32	209	215	398	408	252	434	474	482	215	125	269	467	2157	3320	2810	639	2733	1.95525	2.31989	1.37034	3.844	1.72217	8.60464	5.28442	0.972288	7.41425	5.68053	16.4103	17.1406	10.4799	16.2379	15.3992	16.7932	9.23748	5.13522	10.408
ENSAMEG00000001433	GL192369.1	+	555812	573990	1635	570	221	518	285	491	905	762	217	630	807	852	606	1150	771	1353	1035	513	962	675	1199	849	882	1266	627	1117	20.4494	8.80998	19.2112	10.4035	16.9519	29.6837	23.0646	7.13773	24.1945	23.0823	38.0302	27.5609	51.7738	31.2285	47.5852	39.0376	23.8609	42.7838	28.2731
ENSAMEG00000001434	GL192544.1	-	383887	485005	1377	88	30	75	80	74	142	248	132	197	270	415	305	519	365	665	425	222	540	207	652	826	954	1306	291	1427	3.74863	1.42	3.3027	3.46743	3.03356	5.53022	8.91305	5.15535	8.98311	9.16967	21.9949	16.4704	27.7437	17.5539	27.7702	19.0334	12.2605	28.5156	10.2949
ENSAMEG00000001435	GL192583.1	-	1602610	1620073	1965	3	5	2	12	1	96	102	6	71	35	236	344	129	287	168	363	138	124	130	216	269	873	230	187	177	0.0895535	0.165847	0.0617177	0.364478	0.0287271	2.61997	2.56889	0.164213	2.26877	0.83297	8.76509	13.0177	4.83234	9.67239	4.9163	11.3921	5.34078	4.58861	4.53073
ENSAMEG00000001436	GL192522.1	-	2092485	2108254	1635	124	31	155	63	122	148	59	69	54	232	578	338	497	427	757	404	226	543	242	599	283	101	459	151	335	4.44864	1.23579	5.74852	2.29972	4.21208	4.85436	1.78584	2.2696	2.07382	6.63581	25.7998	15.3723	22.3753	17.2952	26.6238	15.2379	10.5118	24.1493	10.1364
ENSAMEG00000001437	GL193227.1	-	78063	103060	1128	44	16	29	22	20	43	47	13	52	35	29	39	44	52	62	60	67	108	12	61	90	59	113	36	123	2.28806	0.924509	1.55895	1.16403	1.00087	2.04431	2.06204	0.619801	2.8946	1.45105	1.87627	2.57095	2.87127	3.05287	3.16063	3.28022	4.51704	6.96204	0.72855
ENSAMEG00000001438	GL194569.1	-	38549	48998	519	0	0	0	2	1	0	0	0	0	1	82	5	15	5	105	2	1	0	2	1	2217	109	1673	9	2941	0	0	0	0.229993	0.108765	0	0	0	0	0.0901065	11.5306	0.716377	2.12742	0.637995	11.6336	0.237642	0.146528	0	0.263907
ENSAMEG00000001439	GL195143.1	+	1498	41174	1455	40	22	93	26	54	7	1	3	14	11	153	81	114	112	284	108	98	209	120	191	94	18	152	48	125	1.70022	1.03907	4.08645	1.12447	2.20887	0.272024	0.0358616	0.116912	0.637006	0.372767	8.09132	4.3646	6.08073	5.37469	11.834	4.8262	5.40051	11.0126	5.95511
ENSAMEG00000001440	GL194569.1	-	94645	105989	606	0	1	0	0	0	1	0	0	0	1	378	21	55	23	529	7	10	1	19	11	0	1	0	0	0	0	0.107554	0	0	0	0.0884943	0	0	0	0.0771704	45.5225	2.57683	6.68068	2.51345	50.1966	0.712338	1.25492	0.119991	2.14718
ENSAMEG00000001441	GL192730.1	+	259255	264713	852	1	1	1	1	8	0	2	0	3	0	1	0	3	3	0	9	12	58	0	18	5	2	10	0	4	0.0688468	0.0764999	0.0711709	0.0700507	0.530036	0	0.116171	0	0.221094	0	0.0856579	0	0.259186	0.233183	0	0.651424	1.0711	4.95006	0
ENSAMEG00000001442	GL192647.1	+	470840	483707	1032	0	1	2	1	0	0	1	1	3	2	3	0	2	0	1	0	7	3	6	0	0	1	0	1	0	0	0.0631569	0.117515	0.0578326	0	0	0.0479545	0.0521121	0.182531	0.0906304	0.212153	0	0.142653	0	0.0557201	0	0.51583	0.21138	0.398161
ENSAMEG00000001443	GL194569.1	-	141554	153015	567	0	0	0	2	0	0	2	0	1	1	191	14	42	29	348	6	10	3	14	1	1	0	1	1	0	0	0	0	0.210523	0	0	0.174564	0	0.110742	0.0824785	24.5843	1.83605	5.45251	3.38711	35.2929	0.652573	1.34124	0.384734	1.69096
ENSAMEG00000001444	GL195143.1	+	10349	58381	492	38	20	59	27	61	2	4	2	1	6	43	25	43	28	56	48	27	34	26	41	22	11	58	10	30	3.98745	2.33195	6.40004	2.88273	6.15989	0.19187	0.354125	0.192414	0.112327	0.501953	5.61389	3.32558	5.66222	3.31712	5.7606	5.2953	3.67316	4.42272	3.18529
ENSAMEG00000001445	GL193653.1	-	192166	274365	1773	7	1	2	7	2	25	25	2	20	10	19	19	11	18	30	101	28	25	14	116	8	18	59	7	10	0.231586	0.0367614	0.0684012	0.235636	0.0636761	0.756169	0.697814	0.0606652	0.708297	0.263764	0.782081	0.796863	0.456682	0.672323	0.972981	3.51296	1.20098	1.02531	0.540763
ENSAMEG00000001446	GL196207.1	+	8411	9514	354	0	2	0	0	2	2	2	0	3	1	0	4	0	5	9	1	0	5	2	1	2	1	1	2	6	0	0.368237	0	0	0.31892	0.30298	0.279599	0	0.532123	0.132105	0	0.840225	0	0.935365	1.46194	0.174204	0	1.02704	0.386914
ENSAMEG00000001447	GL193448.1	+	652519	684496	966	340	187	294	389	349	519	423	161	359	893	1787	806	2017	1552	3359	1909	1010	1547	1132	2591	611	585	1123	637	1102	20.6455	12.6172	18.4549	24.0339	20.394	28.8123	21.6706	8.96328	23.3352	43.2313	135.006	62.0436	153.695	106.397	199.951	121.868	79.5119	116.449	80.2522
ENSAMEG00000001448	GL193319.1	+	511	4615	600	449	327	314	324	358	424	352	414	373	349	718	661	758	569	715	531	450	517	501	436	515	803	537	352	423	43.8954	35.5219	31.7337	32.2289	33.6811	37.8968	29.0335	37.108	39.0348	27.2018	87.3334	81.9199	92.9926	62.8023	68.5246	54.5763	57.036	62.6558	57.1839
ENSAMEG00000001449	GL193502.1	-	610348	612447	354	10	3	13	9	8	446	308	1646	243	597	1	4	10	9	13	14	4	25	1	22	113	131	223	15	195	1.65699	0.552355	2.22681	1.51737	1.27568	67.5646	43.0582	250.06	43.102	78.8669	0.20616	0.840225	2.07935	1.68366	2.1117	2.43885	0.8593	5.13522	0.193457
ENSAMEG00000001450	GL192730.1	-	295851	316609	1017	89	67	61	82	69	211	159	64	107	123	156	93	123	110	158	177	214	120	226	199	205	271	239	224	227	5.13325	4.29392	3.63707	4.81221	3.82986	11.1263	7.73722	3.38437	6.60628	5.65598	11.1947	6.79988	8.90255	7.16285	8.93363	10.7328	16.0022	8.5799	15.2186
ENSAMEG00000001451	GL192647.1	+	486888	504314	1671	0	1	1	1	1	8106	3700	1276	2520	5289	0	2	0	3	0	2	0	0	0	2	0	1	0	3	0	0	0.0390053	0.0362882	0.0357171	0.0337815	260.147	109.581	41.067	94.6931	148.02	0	0.0890005	0	0.118894	0	0.0738099	0	0	0
ENSAMEG00000001452	GL192583.1	-	1631162	1637146	1053	14	31	1	21	4	353	49	12	26	105	8	17	3	3	3	8	16	8	13	9	258	493	88	348	125	0.779872	1.91882	0.0575856	1.19026	0.214431	17.9777	2.30291	0.612874	1.55038	4.66321	0.554458	1.20049	0.209712	0.188672	0.163827	0.468514	1.15553	0.552438	0.845478
ENSAMEG00000001454	GL193502.1	-	614790	624214	1434	2	4	2	1	5	17	33	9	18	6	0	0	0	0	0	2	4	1	0	2	3	1	11	0	3	0.0818096	0.181807	0.0845713	0.0416201	0.196823	0.635752	1.13887	0.337529	0.788166	0.195671	0	0	0	0	0	0.0860086	0.212128	0.0507076	0
ENSAMEG00000001455	GL193319.1	+	12195	34709	4704	20	5	2	4	2	2	4	0	2	2	69	31	12	12	24	21	28	10	38	10	22	6	5	5	10	0.249394	0.0692792	0.0257813	0.050751	0.0240004	0.0228008	0.0420825	0	0.0266967	0.0198832	1.07051	0.490042	0.187778	0.168938	0.293383	0.275304	0.452667	0.154581	0.553228
ENSAMEG00000001456	GL193163.1	+	176014	207885	1446	0	0	0	0	0	1	0	0	0	0	3	1	2	1	0	0	1	0	0	0	0	0	0	0	0	0	0	0	0	0	0.0370868	0	0	0	0	0.151412	0.0514246	0.10181	0.0457979	0	0	0.052592	0	0
ENSAMEG00000001457	GL192522.1	+	2127752	2225033	1233	125	117	148	135	104	78	82	30	45	115	283	227	276	350	392	211	130	185	139	301	110	43	183	160	175	5.94663	6.18476	7.27848	6.53466	4.7613	3.3925	3.29124	1.30851	2.29163	4.36173	16.7506	13.6899	16.4769	18.7983	18.2816	10.5531	8.01804	10.9102	7.72039
ENSAMEG00000001458	GL192386.1	-	3036464	3044013	2097	42	7	12	7	15	20	17	2	11	18	169	87	216	75	172	239	90	152	88	222	25	17	51	9	11	1.17483	0.21757	0.346996	0.199229	0.403783	0.511469	0.401198	0.051292	0.329373	0.401419	5.8816	3.08503	7.58203	2.36852	4.71652	7.02846	3.26387	5.27069	2.8739
ENSAMEG00000001459	GL193251.1	-	800587	825105	690	1	2	0	0	1	4	2	3	0	5	1	0	3	2	0	6	12	14	5	11	10	7	16	1	13	0.0850109	0.188921	0	0	0.0818099	0.310884	0.143446	0.233825	0	0.338879	0.105769	0	0.320039	0.191953	0	0.536245	1.32257	1.47537	0.496259
ENSAMEG00000001460	GL193502.1	-	629334	646695	1530	0	0	0	0	4	1	3	0	0	0	0	0	0	0	0	0	0	0	0	0	0	2	1	0	3	0	0	0	0	0.147579	0.0350507	0.0970373	0	0	0	0	0	0	0	0	0	0	0	0
ENSAMEG00000001461	GL192982.1	-	105847	309190	2163	0	0	0	6	4	0	0	0	0	0	0	0	0	0	0	0	0	0	0	1	29	25	75	10	64	0	0	0	0.165557	0.10439	0	0	0	0	0	0	0	0	0	0	0	0	0	0
ENSAMEG00000001463	GL193227.1	-	106741	112679	774	2544	1824	3309	2328	3231	1637	1996	4138	1606	2139	734	718	1202	943	1224	635	445	898	572	766	878	1468	1120	1112	1308	192.797	153.597	259.238	179.512	235.641	113.422	127.623	287.52	130.286	129.239	69.2089	68.9799	114.313	80.6836	90.9352	50.5934	43.7227	84.3641	50.6107
ENSAMEG00000001464	GL193163.1	+	209564	222659	1101	143	102	194	183	156	137	133	124	116	97	147	175	392	234	196	242	195	389	174	261	298	367	395	213	336	7.61855	6.03828	10.6846	9.9201	7.9982	6.673	5.97824	6.05693	6.61554	4.1201	9.74399	11.8192	26.2077	14.0748	10.2367	13.5547	13.469	25.6912	10.823
ENSAMEG00000001465	GL192544.1	+	492582	520845	1350	346	171	408	215	433	308	383	816	305	821	615	440	905	741	1252	544	430	895	470	791	535	440	1231	710	1036	15.0337	8.25586	18.326	9.5051	18.1054	12.235	14.0402	32.5068	14.186	28.4402	33.2467	24.2358	49.3452	36.3495	53.3289	24.85	24.2227	48.2071	23.8425
ENSAMEG00000001466	GL193168.1	+	536939	791308	1113	0	0	0	0	0	0	0	0	0	0	1	0	0	0	2	1	0	2	0	0	0	0	0	0	0	0	0	0	0	0	0	0	0	0	0	0.065571	0	0	0	0.10333	0.0554071	0	0.130664	0
ENSAMEG00000001467	GL192842.1	+	151986	173701	2916	0	0	0	0	0	0	0	0	0	0	5	0	0	0	1	0	0	0	1	0	0	0	0	0	0	0	0	0	0	0	0	0	0	0	0	0.125138	0	0	0	0.0197199	0	0	0	0.0234855
ENSAMEG00000001468	GL193301.1	-	234738	240707	867	94	244	53	480	73	2205	4294	328	2551	1665	5793	8666	4642	7896	7110	768	2306	369	1359	629	1590	13234	870	2840	1749	6.35964	18.343	3.7068	33.0426	4.7529	136.388	245.105	20.3457	184.751	89.8088	487.631	743.256	394.109	603.118	471.566	54.6264	202.269	30.9478	107.346
ENSAMEG00000001469	GL194995.1	+	10073	69642	1304	63	6	21	16	20	51	327	3	229	41	34	154	136	216	51	962	518	538	643	1132	34	35	138	126	38	2.83391	0.299898	0.976526	0.732309	0.86578	2.0974	12.4102	0.123726	11.0269	1.47038	1.90287	8.78177	7.677	10.9696	2.24897	45.4944	30.2093	30.0004	33.7692
ENSAMEG00000001470	GL192369.1	+	575249	577892	1572	918	210	185	196	339	601	275	61	186	267	1313	1004	643	661	894	1011	395	563	524	635	1001	800	493	419	610	34.2542	8.70697	7.13611	7.44142	12.1731	20.5026	8.65743	2.08687	7.42942	7.94296	60.9564	47.492	30.1085	27.846	32.7022	39.6606	19.1088	26.0422	22.8279
ENSAMEG00000001471	GL194258.1	-	23607	24702	1029	0	0	0	0	0	0	0	0	0	0	0	0	0	0	0	0	0	0	0	0	0	0	0	0	0	0	0	0	0	0	0	0	0	0	0	0	0	0	0	0	0	0	0	0
ENSAMEG00000001472	GL192626.1	+	1689945	1693053	2739	0	0	0	0	0	0	0	0	0	0	0	0	0	0	0	0	0	0	0	0	1	0	0	0	0	0	0	0	0	0	0	0	0	0	0	0	0	0	0	0	0	0	0	0
ENSAMEG00000001473	GL192583.1	-	1693444	1724581	380	0	0	0	0	0	0	0	0	0	0	0	1	0	0	0	0	0	0	0	0	8	1	6	0	8	0	0	0	0	0	0	0	0	0	0	0	0.195684	0	0	0	0	0	0	0
ENSAMEG00000001474	GL192369.1	-	578749	583898	1419	1206	478	757	662	991	1160	1129	613	839	986	1482	1182	1612	1291	2088	1852	704	1315	859	1862	1507	1577	1919	1236	1596	49.8527	21.9556	32.3486	27.8437	39.4227	43.8393	39.375	23.2325	37.1256	32.4951	76.2207	61.9404	83.6205	60.2502	84.6135	80.4858	37.7293	67.3853	41.457
ENSAMEG00000001475	GL192616.1	+	10982	121500	1338	9	6	4	4	6	27	72	2	53	37	282	114	382	233	381	392	124	309	122	359	13	13	47	23	16	0.394557	0.292277	0.181278	0.178425	0.253134	1.08217	2.66309	0.0803882	2.48722	1.29321	15.3815	6.3356	21.0154	11.5323	16.3742	18.0672	7.0478	16.7929	6.24441
ENSAMEG00000001476	GL192583.1	+	1788810	1796638	1518	19	1	0	3	2	418	618	21	395	128	37	39	62	45	51	254	106	101	123	197	621	599	386	99	438	0.734185	0.0429367	0	0.117951	0.0743726	14.767	20.1477	0.743988	16.3388	3.94332	1.77884	1.91043	3.00642	1.96316	1.93192	10.3186	5.31034	4.83807	5.54908
ENSAMEG00000001477	GL192469.1	+	211750	274721	1419	49	228	49	226	33	90	146	23	184	114	83	184	117	425	120	137	258	189	267	167	144	113	141	304	120	2.07076	10.7065	2.14067	9.71787	1.34208	3.47729	5.20562	0.891162	8.32382	3.84095	4.36411	9.85751	6.20478	20.2775	4.97145	6.08684	14.1357	9.90135	13.1737
ENSAMEG00000001478	GL192709.1	+	392992	440505	2214	690	339	721	501	685	966	685	3209	580	1387	898	716	1180	1036	1337	860	960	1201	1174	1146	813	863	1414	808	1188	18.2808	9.97981	19.7469	13.5055	17.465	23.3985	15.3116	77.949	16.4492	29.297	29.601	24.0477	39.2315	30.9882	34.7253	23.9542	32.9748	39.4446	36.3143
ENSAMEG00000001479	GL193354.1	+	557928	630410	2394	31	5	10	55	47	87	71	3	68	115	2205	1121	880	1332	2886	838	132	163	160	884	206	26	763	67	184	0.727062	0.130304	0.242454	1.31251	1.06081	1.86549	1.40493	0.0645098	1.70722	2.15034	64.3431	33.3297	25.9	35.2699	66.3551	20.6629	4.01373	4.7391	4.38121
ENSAMEG00000001480	GL193227.1	-	114832	124800	2517	282	91	54	144	189	411	340	185	182	321	1869	5819	2049	9009	2044	3992	3795	5406	2484	3446	170	249	103	227	150	6.57188	2.35645	1.30093	3.41453	4.23871	8.75682	6.68505	3.95282	4.54028	5.96411	54.1917	171.911	59.9224	237.032	46.697	97.8066	114.661	156.176	67.5859
ENSAMEG00000001481	GL192626.1	+	1746186	1769529	1037	2	0	0	0	0	0	2	0	0	1	184	252	96	145	202	25	19	5	12	7	126	25	105	1	46	0.113129	0	0	0	0	0	0.0954465	0	0	0.0450967	12.9493	18.0701	6.81432	9.25984	11.2012	1.4867	1.39336	0.350601	0.792483
ENSAMEG00000001482	GL193283.1	+	355149	375001	2586	12	7	9	17	10	22	60	4	31	21	234	277	200	377	219	267	483	436	480	199	33	68	82	57	29	0.272193	0.176429	0.211036	0.392349	0.218286	0.456228	1.14824	0.0831859	0.75271	0.379765	6.60381	7.96508	5.69288	9.65444	4.86976	6.36713	14.2039	12.2597	12.7116
ENSAMEG00000001483	GL192790.1	-	510567	533277	1011	676	1128	772	2142	640	1337	1808	645	1857	1808	1261	1120	1477	2565	2394	1881	2446	1866	2477	2615	1434	1812	2467	1678	2380	39.221	72.7207	46.3029	126.45	35.7342	70.9199	88.5026	34.3105	115.333	83.6317	91.0272	82.377	107.537	168.016	136.165	114.736	183.99	134.209	167.789
ENSAMEG00000001484	GL192386.1	+	3100627	3104966	2271	311	104	269	208	245	409	267	123	217	245	833	629	801	788	883	773	704	717	895	645	516	553	494	432	483	8.0328	2.98481	7.18253	5.46636	6.08981	9.65815	5.81839	2.91277	5.9998	5.04513	26.7692	20.5955	25.9624	22.9786	22.3581	20.9905	23.5746	22.9575	26.9894
ENSAMEG00000001485	GL196564.1	-	1885	3316	477	3	1	4	3	2	1	0	0	1	0	1	1	4	0	3	5	3	3	4	3	2	6	8	3	1	0.263827	0.097718	0.363644	0.26844	0.169262	0.0804011	0	0	0.0941388	0	0.109416	0.111484	0.441433	0	0.258635	0.46228	0.342045	0.327053	0.410697
ENSAMEG00000001486	GL193301.1	-	271416	310231	1503	732	640	554	554	461	627	794	240	500	305	539	1175	559	1346	524	1043	994	658	872	697	1556	1820	975	686	1301	28.5677	27.7537	22.3508	21.999	17.314	22.3716	26.1439	8.58758	20.8884	9.48996	26.172	58.1323	27.3768	59.3062	20.0477	42.7943	50.2939	31.8338	39.7324
ENSAMEG00000001488	GL194310.1	-	110764	163668	528	32	26	49	98	46	143	526	300	450	258	301	204	345	434	547	236	442	350	488	362	212	208	355	140	432	2.19537	1.98202	3.47514	6.84088	3.03701	8.96928	30.4459	18.8701	33.0477	14.1116	25.6926	17.742	29.7018	33.6154	36.7886	17.0218	39.3137	29.7662	39.0878
ENSAMEG00000001489	GL193163.1	-	223609	233675	1389	162	56	98	69	113	227	148	19	84	305	468	264	403	312	591	240	153	351	157	331	245	151	267	105	267	6.84126	2.62776	4.27825	2.96482	4.59231	8.76418	5.27313	0.735647	3.79727	10.2688	24.5896	14.1332	21.3566	14.8753	24.4668	10.6554	8.37678	18.375	7.74078
ENSAMEG00000001490	GL192641.1	+	288494	458511	2538	0	0	0	2	0	0	0	0	0	0	73	12	29	20	128	0	3	1	0	0	3	3	4	0	2	0	0	0	0.0470317	0	0	0	0	0	0	2.09912	0.351584	0.841079	0.521858	2.90008	0	0.0898913	0.0286504	0
ENSAMEG00000001491	GL192730.1	-	327118	482276	2696	207	172	97	383	193	116	227	12	192	98	377	415	264	406	396	790	435	442	380	747	250	144	313	491	165	4.50375	4.15823	2.18169	8.47873	4.04103	2.30742	4.16691	0.239376	4.47173	1.69993	10.2054	11.4464	7.20799	9.97288	8.44631	18.0704	12.2704	11.9213	9.65275
ENSAMEG00000001492	GL192641.1	-	514518	542260	1148	0	0	0	0	0	0	0	0	0	0	0	0	0	0	0	0	0	0	0	0	0	1	0	0	0	0	0	0	0	0	0	0	0	0	0	0	0	0	0	0	0	0	0	0
ENSAMEG00000001493	GL192842.1	-	188920	195402	1080	225	138	70	37	45	281	161	0	77	45	57	22	38	8	39	885	546	222	722	337	124	149	50	24	54	12.2203	8.32828	3.93022	2.0447	2.35203	13.9531	7.37753	0	4.47673	1.94855	3.85175	1.51474	2.58994	0.490547	2.0765	50.5336	38.4465	14.9469	45.7826
ENSAMEG00000001494	GL192790.1	+	544457	547349	378	131	96	143	143	151	301	410	140	366	544	216	195	261	373	425	314	276	332	452	421	213	295	395	445	409	20.3284	16.5531	22.9396	22.5786	22.5497	42.7034	53.6785	19.9184	60.7972	67.3024	41.7032	38.3603	50.8252	65.3479	64.653	51.227	55.5272	63.8658	81.8906
ENSAMEG00000001495	GL192790.1	-	571273	577864	1305	3	1	3	0	0	0	0	1	3	0	2	3	0	1	0	2	3	2	2	4	1	0	2	1	0	0.134845	0.0499447	0.139397	0	0	0	0	0.0412105	0.144346	0	0.111848	0.170942	0	0.0507462	0	0.0945106	0.174823	0.11144	0.104956
ENSAMEG00000001496	GL192641.1	-	609081	620022	2022	0	3	0	8	8	0	0	1	0	0	2	27	15	157	5	9	5	5	0	14	0	10	1	7	0	0	0.0967031	0	0.236135	0.223339	0	0	0.0265973	0	0	0.0721865	0.992937	0.54606	5.14201	0.142194	0.274487	0.188052	0.179809	0
ENSAMEG00000001497	GL192790.1	+	587322	607691	1113	346	287	409	310	365	264	348	455	214	500	541	467	608	602	878	681	391	704	466	708	632	621	716	432	884	18.2349	16.8069	22.2828	16.6234	18.512	12.7203	15.4736	21.9854	12.0729	21.0087	35.4739	31.2004	40.2104	35.8192	45.3619	37.7323	26.7159	45.9938	28.6733
ENSAMEG00000001498	GL193466.1	-	178728	179215	471	0	0	0	0	0	0	0	0	0	0	0	0	0	0	0	0	0	0	0	0	0	0	0	0	0	0	0	0	0	0	0	0	0	0	0	0	0	0	0	0	0	0	0	0
ENSAMEG00000001499	GL192842.1	+	337237	438566	1530	149	66	74	56	67	255	241	37	160	126	1067	687	562	438	559	709	575	528	446	558	579	424	493	131	341	5.86182	2.88514	3.00951	2.24162	2.5366	9.17171	7.99923	1.33457	6.73809	3.952	52.2268	34.2624	27.7453	19.4541	21.5589	29.3244	29.3277	25.7501	20.4854
ENSAMEG00000001500	GL192641.1	-	640342	667869	1926	0	0	0	0	0	1	0	0	0	3	0	1	0	0	0	10	2	0	2	3	9	3	0	8	3	0	0	0	0	0	0.0279747	0	0	0	0.0731851	0	0.0387897	0	0	0	0.321691	0.0793407	0	0.0714489
ENSAMEG00000001501	GL192647.1	-	509069	526362	3045	9015	1338	758	2845	3821	3213	525	5	339	1415	6403	3181	2454	1621	3806	13645	1382	1645	1447	5283	2447	1214	1195	1383	736	173.661	28.6397	15.0947	55.7631	70.8345	56.5863	8.53259	0.0883082	6.99048	21.7317	153.463	77.6811	59.3222	35.2541	71.8742	276.342	34.5151	39.2826	32.5438
ENSAMEG00000001502	GL192667.1	-	1278245	1283471	1686	2035	821	1230	1381	1730	129	174	24	171	98	975	1035	1059	1159	949	1549	671	857	676	1000	250	605	297	1096	236	70.7995	31.7385	44.2374	48.8864	57.922	4.10317	5.10741	0.765547	6.36844	2.71827	42.204	45.648	46.2348	45.524	32.3668	56.6571	30.2659	36.9611	27.4585
ENSAMEG00000001503	GL193283.1	-	451706	566921	837	115	65	222	108	146	369	229	437	147	619	299	209	404	297	527	384	274	562	306	632	286	240	501	147	521	8.06892	5.06766	16.1023	7.71027	9.85829	23.6705	13.5562	28.1121	11.0409	34.6265	26.1019	18.59	35.5718	23.5269	36.249	28.326	24.9248	48.8824	25.067
ENSAMEG00000001504	GL192544.1	+	589981	640183	3306	301	212	394	540	383	913	1033	230	826	1162	1148	964	798	1583	1604	2393	2147	1915	2365	3537	907	305	1452	2557	1114	5.34057	4.17959	7.22663	9.74862	6.5396	14.81	15.4634	3.74148	15.6881	16.4372	25.3423	21.6827	17.7677	31.7097	27.8993	44.6376	49.3875	42.12	48.9909
ENSAMEG00000001505	GL192469.1	+	575490	581783	900	78	40	64	95	74	9	8	2	12	12	475	1006	1295	1337	697	377	323	632	393	412	15	57	73	81	26	5.08365	2.89679	4.31201	6.29989	4.64135	0.536275	0.439902	0.11951	0.837208	0.623537	38.5175	83.1179	105.915	98.3792	44.533	25.8321	27.2928	51.0619	29.9046
ENSAMEG00000001506	GL193653.1	+	388142	433721	639	66	43	62	83	59	194	247	146	177	175	214	140	216	142	239	456	219	333	334	461	213	154	329	131	196	6.05852	4.38599	5.88346	7.75228	5.21202	16.2813	19.1296	12.2877	17.3927	12.8074	24.4411	16.2917	24.8819	14.7164	21.5074	44.0073	26.0634	37.8936	35.7959
ENSAMEG00000001507	GL192469.1	+	644188	732973	4272	84	50	63	89	75	194	97	1	100	161	182	271	135	340	194	212	278	375	237	234	124	78	220	126	117	1.15338	0.76285	0.894235	1.2434	0.991026	2.43533	1.1237	0.0125889	1.46982	1.76246	3.10919	4.71712	2.32612	5.27062	2.61133	3.06031	4.94882	6.38296	3.79931
ENSAMEG00000001508	GL193466.1	+	260002	322821	2220	4	4	0	1	6	1	0	2	1	2	14	25	65	40	17	210	61	301	64	296	2	0	9	3	3	0.105689	0.117438	0	0.0268843	0.152564	0.0241565	0	0.0484502	0.028284	0.0421309	0.460238	0.837387	2.15522	1.19322	0.440339	5.83347	2.08961	9.85906	1.97431
ENSAMEG00000001509	GL192641.1	-	690002	783103	1926	194	176	239	249	230	213	263	122	318	468	786	534	629	836	1390	644	723	664	726	972	573	209	858	605	1004	5.90839	5.95603	7.52461	7.71605	6.74103	5.93077	6.75784	3.40661	10.3673	11.3635	29.7833	20.6169	24.0395	28.7451	41.5002	20.6201	28.5476	25.0688	25.8147
ENSAMEG00000001510	GL193163.1	+	239168	252536	1095	2	1	1	0	3	0	0	0	0	0	2	7	15	3	3	25	7	27	6	40	2	0	5	1	4	0.107137	0.0595232	0.0553768	0	0.154654	0	0	0	0	0	0.133298	0.47536	1.00834	0.181435	0.157543	1.40795	0.486152	1.79296	0.375253
ENSAMEG00000001511	GL195478.1	+	895	20577	1158	10	5	5	15	12	24	68	19	42	21	480	447	464	576	504	267	204	314	243	221	73	47	154	31	88	0.506542	0.281424	0.26182	0.773098	0.584962	1.11145	2.90609	0.882396	2.27738	0.848075	30.251	28.7037	29.4944	32.9404	25.0273	14.2188	13.3971	19.7171	14.3709
ENSAMEG00000001512	GL193319.1	-	21721	25104	351	0	0	0	0	0	0	0	0	0	0	1	0	0	0	1	1	1	0	1	0	0	0	0	0	0	0	0	0	0	0	0	0	0	0	0	0.207922	0	0	0	0.163827	0.175693	0.216661	0	0.19511
ENSAMEG00000001514	GL193163.1	+	260316	269137	1548	366	136	145	100	196	763	530	7	273	309	1463	836	701	553	1300	1595	468	461	425	889	667	387	316	264	401	13.8686	5.72622	5.67988	3.8555	7.14727	26.4327	16.9439	0.24319	11.0735	9.33493	68.9732	40.1582	33.3332	23.6575	48.2908	63.5405	22.9913	21.6547	18.8021
ENSAMEG00000001515	GL193319.1	-	45552	59230	1884	0	0	0	0	0	0	0	0	0	0	0	0	0	0	0	0	0	0	0	0	0	0	0	1	0	0	0	0	0	0	0	0	0	0	0	0	0	0	0	0	0	0	0	0
ENSAMEG00000001516	GL195478.1	+	35530	38218	1137	0	0	0	0	0	0	0	0	0	0	0	1	0	1	0	1	1	0	2	0	471	429	322	60	339	0	0	0	0	0	0	0	0	0	0	0	0.0654001	0	0.0582444	0	0.0542376	0.0668848	0	0.120464
ENSAMEG00000001517	GL193227.1	-	400701	613525	2673	0	1	0	9	3	0	0	0	0	0	2	1	0	1	1	1	0	0	0	2	2	22	0	2	8	0	0.0243838	0	0.200954	0.0633545	0	0	0	0	0	0.0546057	0.0278189	0	0.0247751	0.0215126	0.0230708	0	0	0
ENSAMEG00000001518	GL192386.1	+	3109401	3118220	1386	435	351	243	365	299	897	903	25	597	385	1402	1045	825	819	1322	1753	1049	713	1160	1104	1238	1133	853	603	890	18.4098	16.5061	10.6313	15.7174	12.1776	34.707	32.2428	0.970052	27.0462	12.9904	73.823	56.065	43.8148	39.1323	54.8479	77.9973	57.5573	37.4066	57.3168
ENSAMEG00000001519	GL195541.1	-	28048	28670	597	0	0	0	0	0	0	0	0	0	0	0	0	0	0	0	0	0	0	0	0	0	0	0	0	0	0	0	0	0	0	0	0	0	0	0	0	0	0	0	0	0	0	0	0
ENSAMEG00000001520	GL194985.1	+	44304	59818	1667	0	2	0	2	1	0	0	2	0	0	3	6	7	2	3	7	2	6	9	4	3	5	1	8	3	0	0.0781978	0	0.0716055	0.0338625	0	0	0.0645227	0	0	0.131339	0.267642	0.309096	0.0794527	0.103485	0.258954	0.0912394	0.261721	0.369738
ENSAMEG00000001521	GL192709.1	-	444394	609026	5934	15	5	26	13	34	21	12	38	21	26	37	20	43	41	44	61	124	113	124	107	115	44	147	27	136	0.148275	0.054919	0.265686	0.130752	0.323434	0.189784	0.100079	0.344393	0.222211	0.204904	0.455052	0.250623	0.533398	0.457563	0.42638	0.633933	1.58914	1.38469	1.43107
ENSAMEG00000001522	GL192790.1	+	831676	906789	660	964	843	995	1297	1169	273	618	1836	832	319	625	939	955	1347	994	711	988	937	1628	872	736	1094	1032	927	921	85.6755	83.2499	91.4158	117.287	99.9829	22.1823	46.3397	149.605	79.1542	22.6032	69.1104	105.794	106.51	135.157	86.6032	66.4334	113.842	103.233	168.927
ENSAMEG00000001523	GL193283.1	+	741819	786718	5016	197	193	201	315	111	351	309	54	305	248	428	529	597	955	530	1379	4453	1370	5490	1497	629	551	1011	998	662	2.30373	2.50784	2.42986	3.74805	1.24917	3.75264	3.04866	0.578968	3.81801	2.31216	6.22721	7.84219	8.76087	12.6084	6.07589	16.9538	67.5124	19.8603	74.9553
ENSAMEG00000001524	GL192842.1	+	715487	717130	447	7	4	6	2	4	4	11	7	3	0	3	2	2	3	6	8	5	5	4	2	6	12	4	11	4	0.918574	0.583247	0.813928	0.267039	0.505135	0.479888	1.21785	0.842188	0.421413	0	0.489802	0.332707	0.329346	0.444455	0.771854	1.10368	0.850649	0.813363	0.61283
ENSAMEG00000001525	GL192369.1	+	584283	588924	1632	1418	1040	978	924	981	907	720	331	386	754	1100	690	987	716	1139	1375	1010	1142	1107	1199	901	892	969	476	915	51.8556	42.26	36.9723	34.3811	34.5239	30.3243	22.2145	11.0979	15.1104	21.9832	50.049	31.9877	45.2943	29.5613	40.833	52.8639	47.8856	51.7707	47.264
ENSAMEG00000001526	GL193300.1	+	506239	508550	669	203	125	111	187	211	391	241	298	222	368	158	141	144	106	177	411	197	205	216	303	706	867	457	333	754	17.7989	12.1782	10.061	16.6827	17.8037	31.3429	17.8279	23.9557	20.8363	25.7244	17.2361	15.6723	15.8441	10.4929	15.2138	37.8858	22.3938	22.2818	22.1113
ENSAMEG00000001527	GL192469.1	-	736943	769477	2025	547	434	534	512	643	1414	1411	1071	1178	2885	1135	1603	1161	2517	1792	1422	1347	1927	1239	2084	762	783	1379	1919	1284	15.8448	13.969	15.9904	15.0903	17.9242	37.4466	34.4834	28.4435	36.5271	66.6261	40.9051	58.8637	42.2024	82.3138	50.8867	43.3047	50.586	69.1956	41.9019
ENSAMEG00000001528	GL192583.1	+	1824935	1852690	1545	137	37	124	70	101	4	4	2	1	4	76	42	100	46	73	310	432	373	564	265	1985	881	2244	162	965	5.20135	1.56089	4.86671	2.70409	3.69018	0.138842	0.128127	0.0696177	0.0406411	0.121075	3.58998	2.02143	4.76433	1.97171	2.71698	12.3735	21.2639	17.5551	24.9999
ENSAMEG00000001529	GL192842.1	+	964150	1032166	3960	9	48	5	24	4	3	1	0	7	0	2	6	5	1	6	4	5	3	0	2	4	3	3	5	3	0.133313	0.790035	0.0765627	0.361716	0.057019	0.0406269	0.0124972	0	0.110993	0	0.0368589	0.112667	0.0929405	0.0167232	0.087126	0.062291	0.0960203	0.0550869	0
[truncated: 23,914 more rows]
[truncated: 13 more columns]
